# Supplementary material for: Modelling the response to vaccine in non-human primates to define SARS-CoV-2 mechanistic correlates of protection
Source: eLife. 2022 Jul 8;11:e75427. doi: 10.7554/eLife.75427 (PMC9282856; doi:10.7554/eLife.75427)
Supplement: Figure 1—source data 1. [file elife-75427-fig1-data1.xlsx]

## Sheet: Feuil1
Figure 1B / Figure 2 - figure supplement 2B
Study [Marlin, 2021]
Fluid	Day post exposure	Group	Animal ID	Viral load (copies/mL)			ND	Not Determined
Nasal fluid	0	Naive	MF1	<LOD			<LOD	Under the limit of detection
Nasal fluid	0	Naive	MF2	<LOD			LOD	749 cp/ml
Nasal fluid	0	Naive	MF3	<LOD
Nasal fluid	0	Naive	MF4	<LOD
Nasal fluid	0	Naive	MF5	<LOD
Nasal fluid	0	Naive	MF6	<LOD
Nasal fluid	0	Conv.	MF7	<LOD
Nasal fluid	0	Conv.	MF8	<LOD
Nasal fluid	0	Conv.	MF9	<LOD
Nasal fluid	0	Conv.	MF10	<LOD
Nasal fluid	0	Conv.	MF11	<LOD
Nasal fluid	0	Conv.	MF12	<LOD
Nasal fluid	0	αCD40.RBD	MF13	<LOD
Nasal fluid	0	αCD40.RBD	MF14	<LOD
Nasal fluid	0	αCD40.RBD	MF15	<LOD
Nasal fluid	0	αCD40.RBD	MF16	<LOD
Nasal fluid	0	αCD40.RBD	MF17	<LOD
Nasal fluid	0	αCD40.RBD	MF18	<LOD
Nasal fluid	1	Naive	MF1	175236
Nasal fluid	1	Naive	MF2	23721
Nasal fluid	1	Naive	MF3	1151168
Nasal fluid	1	Naive	MF4	1815
Nasal fluid	1	Naive	MF5	37730
Nasal fluid	1	Naive	MF6	947804
Nasal fluid	1	Conv.	MF7	14580
Nasal fluid	1	Conv.	MF8	21088
Nasal fluid	1	Conv.	MF9	32188
Nasal fluid	1	Conv.	MF10	42330
Nasal fluid	1	Conv.	MF11	11775
Nasal fluid	1	Conv.	MF12	13551
Nasal fluid	1	αCD40.RBD	MF13	4544
Nasal fluid	1	αCD40.RBD	MF14	<LOD
Nasal fluid	1	αCD40.RBD	MF15	4805
Nasal fluid	1	αCD40.RBD	MF16	11517
Nasal fluid	1	αCD40.RBD	MF17	8353
Nasal fluid	1	αCD40.RBD	MF18	76431
Nasal fluid	2	Naive	MF1	14832925
Nasal fluid	2	Naive	MF2	41399
Nasal fluid	2	Naive	MF3	33827113
Nasal fluid	2	Naive	MF4	277136
Nasal fluid	2	Naive	MF5	2910885
Nasal fluid	2	Naive	MF6	1059207
Nasal fluid	2	Conv.	MF7	51759
Nasal fluid	2	Conv.	MF8	241268
Nasal fluid	2	Conv.	MF9	2671327
Nasal fluid	2	Conv.	MF10	3833
Nasal fluid	2	Conv.	MF11	422750
Nasal fluid	2	Conv.	MF12	486236
Nasal fluid	2	αCD40.RBD	MF13	22479
Nasal fluid	2	αCD40.RBD	MF14	2763
Nasal fluid	2	αCD40.RBD	MF15	1423
Nasal fluid	2	αCD40.RBD	MF16	63565
Nasal fluid	2	αCD40.RBD	MF17	9476
Nasal fluid	2	αCD40.RBD	MF18	22882
Nasal fluid	3	Naive	MF1	345912
Nasal fluid	3	Naive	MF2	ND
Nasal fluid	3	Naive	MF3	134401841
Nasal fluid	3	Naive	MF4	18021
Nasal fluid	3	Naive	MF5	ND
Nasal fluid	3	Naive	MF6	6990088
Nasal fluid	3	Conv.	MF7	8501
Nasal fluid	3	Conv.	MF8	1711
Nasal fluid	3	Conv.	MF9	28200
Nasal fluid	3	Conv.	MF10	615265
Nasal fluid	3	Conv.	MF11	717780
Nasal fluid	3	Conv.	MF12	219813
Nasal fluid	3	αCD40.RBD	MF13	27378
Nasal fluid	3	αCD40.RBD	MF14	<LOD
Nasal fluid	3	αCD40.RBD	MF15	<LOD
Nasal fluid	3	αCD40.RBD	MF16	<LOD
Nasal fluid	3	αCD40.RBD	MF17	<LOD
Nasal fluid	3	αCD40.RBD	MF18	128041
Nasal fluid	4	Naive	MF1	975262
Nasal fluid	4	Naive	MF2	603214
Nasal fluid	4	Naive	MF3	139723
Nasal fluid	4	Naive	MF4	83882
Nasal fluid	4	Naive	MF5	18268
Nasal fluid	4	Naive	MF6	52563
Nasal fluid	4	Conv.	MF7	<LOD
Nasal fluid	4	Conv.	MF8	1147
Nasal fluid	4	Conv.	MF9	46026
Nasal fluid	4	Conv.	MF10	1202
Nasal fluid	4	Conv.	MF11	<LOD
Nasal fluid	4	Conv.	MF12	3711
Nasal fluid	4	αCD40.RBD	MF13	6121
Nasal fluid	4	αCD40.RBD	MF14	<LOD
Nasal fluid	4	αCD40.RBD	MF15	<LOD
Nasal fluid	4	αCD40.RBD	MF16	<LOD
Nasal fluid	4	αCD40.RBD	MF17	<LOD
Nasal fluid	4	αCD40.RBD	MF18	531
Nasal fluid	6	Naive	MF1	3244
Nasal fluid	6	Naive	MF2	24397
Nasal fluid	6	Naive	MF3	211422
Nasal fluid	6	Naive	MF4	<LOD
Nasal fluid	6	Naive	MF5	1072
Nasal fluid	6	Naive	MF6	74086
Nasal fluid	6	Conv.	MF7	<LOD
Nasal fluid	6	Conv.	MF8	<LOD
Nasal fluid	6	Conv.	MF9	<LOD
Nasal fluid	6	Conv.	MF10	11544
Nasal fluid	6	Conv.	MF11	<LOD
Nasal fluid	6	Conv.	MF12	<LOD
Nasal fluid	6	αCD40.RBD	MF13	<LOD
Nasal fluid	6	αCD40.RBD	MF14	<LOD
Nasal fluid	6	αCD40.RBD	MF15	<LOD
Nasal fluid	6	αCD40.RBD	MF16	<LOD
Nasal fluid	6	αCD40.RBD	MF17	<LOD
Nasal fluid	6	αCD40.RBD	MF18	<LOD
Nasal fluid	9	Naive	MF1	<LOD
Nasal fluid	9	Naive	MF2	53601
Nasal fluid	9	Naive	MF3	1336411
Nasal fluid	9	Naive	MF4	<LOD
Nasal fluid	9	Naive	MF5	591328
Nasal fluid	9	Naive	MF6	14632
Nasal fluid	9	Conv.	MF7	<LOD
Nasal fluid	9	Conv.	MF8	<LOD
Nasal fluid	9	Conv.	MF9	<LOD
Nasal fluid	9	Conv.	MF10	<LOD
Nasal fluid	9	Conv.	MF11	<LOD
Nasal fluid	9	Conv.	MF12	<LOD
Nasal fluid	9	αCD40.RBD	MF13	<LOD
Nasal fluid	9	αCD40.RBD	MF14	<LOD
Nasal fluid	9	αCD40.RBD	MF15	<LOD
Nasal fluid	9	αCD40.RBD	MF16	<LOD
Nasal fluid	9	αCD40.RBD	MF17	<LOD
Nasal fluid	9	αCD40.RBD	MF18	<LOD
Nasal fluid	14	Naive	MF1	<LOD
Nasal fluid	14	Naive	MF2	<LOD
Nasal fluid	14	Naive	MF3	27693
Nasal fluid	14	Naive	MF4	<LOD
Nasal fluid	14	Naive	MF5	<LOD
Nasal fluid	14	Naive	MF6	<LOD
Nasal fluid	14	Conv.	MF7	<LOD
Nasal fluid	14	Conv.	MF8	<LOD
Nasal fluid	14	Conv.	MF9	<LOD
Nasal fluid	14	Conv.	MF10	<LOD
Nasal fluid	14	Conv.	MF11	<LOD
Nasal fluid	14	Conv.	MF12	<LOD
Nasal fluid	14	αCD40.RBD	MF13	<LOD
Nasal fluid	14	αCD40.RBD	MF14	<LOD
Nasal fluid	14	αCD40.RBD	MF15	<LOD
Nasal fluid	14	αCD40.RBD	MF16	<LOD
Nasal fluid	14	αCD40.RBD	MF17	<LOD
Nasal fluid	14	αCD40.RBD	MF18	<LOD
Nasal fluid	20	Naive	MF1	<LOD
Nasal fluid	20	Naive	MF2	<LOD
Nasal fluid	20	Naive	MF3	<LOD
Nasal fluid	20	Naive	MF4	<LOD
Nasal fluid	20	Naive	MF5	<LOD
Nasal fluid	20	Naive	MF6	<LOD
Nasal fluid	20	Conv.	MF7	<LOD
Nasal fluid	20	Conv.	MF8	<LOD
Nasal fluid	20	Conv.	MF9	<LOD
Nasal fluid	20	Conv.	MF10	<LOD
Nasal fluid	20	Conv.	MF11	<LOD
Nasal fluid	20	Conv.	MF12	<LOD
Nasal fluid	20	αCD40.RBD	MF13	<LOD
Nasal fluid	20	αCD40.RBD	MF14	<LOD
Nasal fluid	20	αCD40.RBD	MF16	<LOD
Nasal fluid	20	αCD40.RBD	MF17	<LOD
Nasal fluid	20	αCD40.RBD	MF18	<LOD
Tracheal Fluid	0	Naive	MF1	<LOD
Tracheal Fluid	0	Naive	MF2	<LOD
Tracheal Fluid	0	Naive	MF3	<LOD
Tracheal Fluid	0	Naive	MF4	<LOD
Tracheal Fluid	0	Naive	MF5	<LOD
Tracheal Fluid	0	Naive	MF6	<LOD
Tracheal Fluid	0	Conv.	MF7	<LOD
Tracheal Fluid	0	Conv.	MF8	<LOD
Tracheal Fluid	0	Conv.	MF9	<LOD
Tracheal Fluid	0	Conv.	MF10	<LOD
Tracheal Fluid	0	Conv.	MF11	<LOD
Tracheal Fluid	0	Conv.	MF12	<LOD
Tracheal Fluid	0	αCD40.RBD	MF13	<LOD
Tracheal Fluid	0	αCD40.RBD	MF14	<LOD
Tracheal Fluid	0	αCD40.RBD	MF15	<LOD
Tracheal Fluid	0	αCD40.RBD	MF16	<LOD
Tracheal Fluid	0	αCD40.RBD	MF17	<LOD
Tracheal Fluid	0	αCD40.RBD	MF18	<LOD
Tracheal Fluid	1	Naive	MF1	11156417
Tracheal Fluid	1	Naive	MF2	<LOD
Tracheal Fluid	1	Naive	MF3	<LOD
Tracheal Fluid	1	Naive	MF4	8153258
Tracheal Fluid	1	Naive	MF5	20795
Tracheal Fluid	1	Naive	MF6	38830748
Tracheal Fluid	1	Conv.	MF7	25239
Tracheal Fluid	1	Conv.	MF8	29780
Tracheal Fluid	1	Conv.	MF9	1471727
Tracheal Fluid	1	Conv.	MF10	1296346
Tracheal Fluid	1	Conv.	MF11	<LOD
Tracheal Fluid	1	Conv.	MF12	7839
Tracheal Fluid	1	αCD40.RBD	MF13	<LOD
Tracheal Fluid	1	αCD40.RBD	MF14	4364
Tracheal Fluid	1	αCD40.RBD	MF15	12712
Tracheal Fluid	1	αCD40.RBD	MF16	85953
Tracheal Fluid	1	αCD40.RBD	MF17	<LOD
Tracheal Fluid	1	αCD40.RBD	MF18	2195
Tracheal Fluid	2	Naive	MF1	8737603
Tracheal Fluid	2	Naive	MF2	11130347
Tracheal Fluid	2	Naive	MF3	10828500
Tracheal Fluid	2	Naive	MF4	500409
Tracheal Fluid	2	Naive	MF5	210373
Tracheal Fluid	2	Naive	MF6	47432357
Tracheal Fluid	2	Conv.	MF7	81110
Tracheal Fluid	2	Conv.	MF8	47200
Tracheal Fluid	2	Conv.	MF9	448896
Tracheal Fluid	2	Conv.	MF10	143377
Tracheal Fluid	2	Conv.	MF11	361579
Tracheal Fluid	2	Conv.	MF12	115152
Tracheal Fluid	2	αCD40.RBD	MF13	<LOD
Tracheal Fluid	2	αCD40.RBD	MF14	5388
Tracheal Fluid	2	αCD40.RBD	MF15	3664
Tracheal Fluid	2	αCD40.RBD	MF16	65543
Tracheal Fluid	2	αCD40.RBD	MF17	<LOD
Tracheal Fluid	2	αCD40.RBD	MF18	<LOD
Tracheal Fluid	3	Naive	MF1	32651
Tracheal Fluid	3	Naive	MF2	704669
Tracheal Fluid	3	Naive	MF3	782085
Tracheal Fluid	3	Naive	MF4	4988
Tracheal Fluid	3	Naive	MF5	2930
Tracheal Fluid	3	Naive	MF6	1525292
Tracheal Fluid	3	Conv.	MF7	9285
Tracheal Fluid	3	Conv.	MF8	23983
Tracheal Fluid	3	Conv.	MF9	1035
Tracheal Fluid	3	Conv.	MF10	8255
Tracheal Fluid	3	Conv.	MF11	<LOD
Tracheal Fluid	3	Conv.	MF12	1904
Tracheal Fluid	3	αCD40.RBD	MF13	<LOD
Tracheal Fluid	3	αCD40.RBD	MF14	<LOD
Tracheal Fluid	3	αCD40.RBD	MF15	<LOD
Tracheal Fluid	3	αCD40.RBD	MF16	<LOD
Tracheal Fluid	3	αCD40.RBD	MF17	<LOD
Tracheal Fluid	3	αCD40.RBD	MF18	<LOD
Tracheal Fluid	4	Naive	MF1	47220
Tracheal Fluid	4	Naive	MF2	65987
Tracheal Fluid	4	Naive	MF3	25681
Tracheal Fluid	4	Naive	MF4	66390
Tracheal Fluid	4	Naive	MF5	619175
Tracheal Fluid	4	Naive	MF6	1390
Tracheal Fluid	4	Conv.	MF7	<LOD
Tracheal Fluid	4	Conv.	MF8	<LOD
Tracheal Fluid	4	Conv.	MF9	12313
Tracheal Fluid	4	Conv.	MF10	35741
Tracheal Fluid	4	Conv.	MF11	26620
Tracheal Fluid	4	Conv.	MF12	1603
Tracheal Fluid	4	αCD40.RBD	MF13	<LOD
Tracheal Fluid	4	αCD40.RBD	MF14	<LOD
Tracheal Fluid	4	αCD40.RBD	MF15	<LOD
Tracheal Fluid	4	αCD40.RBD	MF16	<LOD
Tracheal Fluid	4	αCD40.RBD	MF17	<LOD
Tracheal Fluid	4	αCD40.RBD	MF18	<LOD
Tracheal Fluid	6	Naive	MF1	<LOD
Tracheal Fluid	6	Naive	MF2	1801807
Tracheal Fluid	6	Naive	MF3	8269
Tracheal Fluid	6	Naive	MF4	<LOD
Tracheal Fluid	6	Naive	MF5	1234
Tracheal Fluid	6	Naive	MF6	34358
Tracheal Fluid	6	Conv.	MF7	<LOD
Tracheal Fluid	6	Conv.	MF8	<LOD
Tracheal Fluid	6	Conv.	MF9	<LOD
Tracheal Fluid	6	Conv.	MF10	<LOD
Tracheal Fluid	6	Conv.	MF11	<LOD
Tracheal Fluid	6	Conv.	MF12	<LOD
Tracheal Fluid	6	αCD40.RBD	MF13	<LOD
Tracheal Fluid	6	αCD40.RBD	MF14	<LOD
Tracheal Fluid	6	αCD40.RBD	MF15	<LOD
Tracheal Fluid	6	αCD40.RBD	MF16	<LOD
Tracheal Fluid	6	αCD40.RBD	MF17	<LOD
Tracheal Fluid	6	αCD40.RBD	MF18	<LOD
Tracheal Fluid	9	Naive	MF1	58729
Tracheal Fluid	9	Naive	MF2	1451
Tracheal Fluid	9	Naive	MF3	<LOD
Tracheal Fluid	9	Naive	MF4	<LOD
Tracheal Fluid	9	Naive	MF5	671
Tracheal Fluid	9	Naive	MF6	773
Tracheal Fluid	9	Conv.	MF7	<LOD
Tracheal Fluid	9	Conv.	MF8	<LOD
Tracheal Fluid	9	Conv.	MF9	<LOD
Tracheal Fluid	9	Conv.	MF10	<LOD
Tracheal Fluid	9	Conv.	MF11	<LOD
Tracheal Fluid	9	Conv.	MF12	<LOD
Tracheal Fluid	9	αCD40.RBD	MF13	<LOD
Tracheal Fluid	9	αCD40.RBD	MF14	<LOD
Tracheal Fluid	9	αCD40.RBD	MF15	<LOD
Tracheal Fluid	9	αCD40.RBD	MF16	<LOD
Tracheal Fluid	9	αCD40.RBD	MF17	<LOD
Tracheal Fluid	9	αCD40.RBD	MF18	<LOD
Tracheal Fluid	14	Naive	MF1	<LOD
Tracheal Fluid	14	Naive	MF2	<LOD
Tracheal Fluid	14	Naive	MF3	<LOD
Tracheal Fluid	14	Naive	MF4	<LOD
Tracheal Fluid	14	Naive	MF5	<LOD
Tracheal Fluid	14	Naive	MF6	<LOD
Tracheal Fluid	14	Conv.	MF7	<LOD
Tracheal Fluid	14	Conv.	MF8	<LOD
Tracheal Fluid	14	Conv.	MF9	<LOD
Tracheal Fluid	14	Conv.	MF10	<LOD
Tracheal Fluid	14	Conv.	MF11	<LOD
Tracheal Fluid	14	Conv.	MF12	<LOD
Tracheal Fluid	14	αCD40.RBD	MF13	<LOD
Tracheal Fluid	14	αCD40.RBD	MF14	<LOD
Tracheal Fluid	14	αCD40.RBD	MF15	<LOD
Tracheal Fluid	14	αCD40.RBD	MF16	<LOD
Tracheal Fluid	14	αCD40.RBD	MF17	<LOD
Tracheal Fluid	14	αCD40.RBD	MF18	<LOD
Tracheal Fluid	20	Naive	MF1	<LOD
Tracheal Fluid	20	Naive	MF2	<LOD
Tracheal Fluid	20	Naive	MF4	<LOD
Tracheal Fluid	20	Naive	MF5	<LOD
Tracheal Fluid	20	Naive	MF6	<LOD
Tracheal Fluid	20	Conv.	MF7	<LOD
Tracheal Fluid	20	Conv.	MF8	<LOD
Tracheal Fluid	20	Conv.	MF9	<LOD
Tracheal Fluid	20	Conv.	MF10	<LOD
Tracheal Fluid	20	Conv.	MF11	<LOD
Tracheal Fluid	20	Conv.	MF12	<LOD
Tracheal Fluid	20	αCD40.RBD	MF13	<LOD
Tracheal Fluid	20	αCD40.RBD	MF14	<LOD
Tracheal Fluid	20	αCD40.RBD	MF16	<LOD
Tracheal Fluid	20	αCD40.RBD	MF17	<LOD
Tracheal Fluid	20	αCD40.RBD	MF18	<LOD
