# Supplementary material for: Modelling the response to vaccine in non-human primates to define SARS-CoV-2 mechanistic correlates of protection
Source: eLife. 2022 Jul 8;11:e75427. doi: 10.7554/eLife.75427 (PMC9282856; doi:10.7554/eLife.75427)
Supplement: Figure 1—source data 2. [file elife-75427-fig1-data2.xlsx]

## Sheet: Feuil1
Figure 1 - figure supplement 1A
Study [Marlin, 2021]
Fluid	Days post infection (dpi)	Animal ID	Unit	Value			N.D	Not Determined
Tracheal fluid	0	MF10	viral load (copies / mL)	<LOD			<LOD	Under the limit of detection
Tracheal fluid	1	MF10	viral load (copies / mL)	519827
Tracheal fluid	2	MF10	viral load (copies / mL)	3.59104e+06
Tracheal fluid	3	MF10	viral load (copies / mL)	359206
Tracheal fluid	4	MF10	viral load (copies / mL)	102391
Tracheal fluid	5	MF10	viral load (copies / mL)	168898
Tracheal fluid	7	MF10	viral load (copies / mL)	<LOD
Tracheal fluid	9	MF10	viral load (copies / mL)	955.9
Tracheal fluid	11	MF10	viral load (copies / mL)	<LOD
Tracheal fluid	13	MF10	viral load (copies / mL)	354.02
Tracheal fluid	16	MF10	viral load (copies / mL)	N.D.
Tracheal fluid	20	MF10	viral load (copies / mL)	N.D.
Tracheal fluid	27	MF10	viral load (copies / mL)	N.D.
Nasal fluid	0	MF10	viral load (copies / mL)	<LOD
Nasal fluid	1	MF10	viral load (copies / mL)	7822.44
Nasal fluid	2	MF10	viral load (copies / mL)	N.D.
Nasal fluid	3	MF10	viral load (copies / mL)	34045.5
Nasal fluid	4	MF10	viral load (copies / mL)	<LOD
Nasal fluid	5	MF10	viral load (copies / mL)	3594.11
Nasal fluid	7	MF10	viral load (copies / mL)	<LOD
Nasal fluid	9	MF10	viral load (copies / mL)	<LOD
Nasal fluid	11	MF10	viral load (copies / mL)	<LOD
Nasal fluid	13	MF10	viral load (copies / mL)	<LOD
Nasal fluid	16	MF10	viral load (copies / mL)	N.D.
Nasal fluid	20	MF10	viral load (copies / mL)	N.D.
Nasal fluid	27	MF10	viral load (copies / mL)	N.D.
Tracheal fluid	0	MF14	viral load (copies / mL)	<LOD
Tracheal fluid	1	MF14	viral load (copies / mL)	178252
Tracheal fluid	2	MF14	viral load (copies / mL)	9.6219e+06
Tracheal fluid	3	MF14	viral load (copies / mL)	3.19933e+06
Tracheal fluid	4	MF14	viral load (copies / mL)	470312
Tracheal fluid	5	MF14	viral load (copies / mL)	266027
Tracheal fluid	7	MF14	viral load (copies / mL)	<LOD
Tracheal fluid	9	MF14	viral load (copies / mL)	<LOD
Tracheal fluid	11	MF14	viral load (copies / mL)	<LOD
Tracheal fluid	13	MF14	viral load (copies / mL)	<LOD
Tracheal fluid	16	MF14	viral load (copies / mL)	N.D.
Tracheal fluid	20	MF14	viral load (copies / mL)	N.D.
Tracheal fluid	27	MF14	viral load (copies / mL)	N.D.
Nasal fluid	0	MF14	viral load (copies / mL)	<LOD
Nasal fluid	1	MF14	viral load (copies / mL)	5.69986e+06
Nasal fluid	2	MF14	viral load (copies / mL)	N.D.
Nasal fluid	3	MF14	viral load (copies / mL)	2.6793e+07
Nasal fluid	4	MF14	viral load (copies / mL)	1.36103e+06
Nasal fluid	5	MF14	viral load (copies / mL)	519827
Nasal fluid	7	MF14	viral load (copies / mL)	95535.4
Nasal fluid	9	MF14	viral load (copies / mL)	2112.76
Nasal fluid	11	MF14	viral load (copies / mL)	<LOD
Nasal fluid	13	MF14	viral load (copies / mL)	<LOD
Nasal fluid	16	MF14	viral load (copies / mL)	N.D.
Nasal fluid	20	MF14	viral load (copies / mL)	N.D.
Nasal fluid	27	MF14	viral load (copies / mL)	N.D.
Tracheal fluid	0	MF11	viral load (copies / mL)	<LOD
Tracheal fluid	1	MF11	viral load (copies / mL)	601723
Tracheal fluid	2	MF11	viral load (copies / mL)	1.95396e+07
Tracheal fluid	3	MF11	viral load (copies / mL)	1.16644e+07
Tracheal fluid	4	MF11	viral load (copies / mL)	6.06201e+06
Tracheal fluid	5	MF11	viral load (copies / mL)	12416.1
Tracheal fluid	7	MF11	viral load (copies / mL)	<LOD
Tracheal fluid	9	MF11	viral load (copies / mL)	<LOD
Tracheal fluid	11	MF11	viral load (copies / mL)	<LOD
Tracheal fluid	13	MF11	viral load (copies / mL)	<LOD
Tracheal fluid	16	MF11	viral load (copies / mL)	N.D.
Tracheal fluid	20	MF11	viral load (copies / mL)	N.D.
Tracheal fluid	27	MF11	viral load (copies / mL)	N.D.
Nasal fluid	0	MF11	viral load (copies / mL)	<LOD
Nasal fluid	1	MF11	viral load (copies / mL)	3.48014e+08
Nasal fluid	2	MF11	viral load (copies / mL)	N.D.
Nasal fluid	3	MF11	viral load (copies / mL)	3.03059e+07
Nasal fluid	4	MF11	viral load (copies / mL)	2.63836e+07
Nasal fluid	5	MF11	viral load (copies / mL)	2.22722e+07
Nasal fluid	7	MF11	viral load (copies / mL)	<LOD
Nasal fluid	9	MF11	viral load (copies / mL)	27023.2
Nasal fluid	11	MF11	viral load (copies / mL)	<LOD
Nasal fluid	13	MF11	viral load (copies / mL)	<LOD
Nasal fluid	16	MF11	viral load (copies / mL)	N.D.
Nasal fluid	20	MF11	viral load (copies / mL)	N.D.
Nasal fluid	27	MF11	viral load (copies / mL)	N.D.
Tracheal fluid	0	MF12	viral load (copies / mL)	<LOD
Tracheal fluid	1	MF12	viral load (copies / mL)	4.59441e+06
Tracheal fluid	2	MF12	viral load (copies / mL)	1.22159e+07
Tracheal fluid	3	MF12	viral load (copies / mL)	891136
Tracheal fluid	4	MF12	viral load (copies / mL)	511883
Tracheal fluid	5	MF12	viral load (copies / mL)	96273.8
Tracheal fluid	7	MF12	viral load (copies / mL)	71300
Tracheal fluid	9	MF12	viral load (copies / mL)	<LOD
Tracheal fluid	11	MF12	viral load (copies / mL)	<LOD
Tracheal fluid	13	MF12	viral load (copies / mL)	<LOD
Tracheal fluid	16	MF12	viral load (copies / mL)	N.D.
Tracheal fluid	20	MF12	viral load (copies / mL)	N.D.
Tracheal fluid	27	MF12	viral load (copies / mL)	N.D.
Nasal fluid	0	MF12	viral load (copies / mL)	<LOD
Nasal fluid	1	MF12	viral load (copies / mL)	1.90934e+07
Nasal fluid	2	MF12	viral load (copies / mL)	N.D.
Nasal fluid	3	MF12	viral load (copies / mL)	3.96798e+07
Nasal fluid	4	MF12	viral load (copies / mL)	6.80421e+06
Nasal fluid	5	MF12	viral load (copies / mL)	592527
Nasal fluid	7	MF12	viral load (copies / mL)	42200893
Nasal fluid	9	MF12	viral load (copies / mL)	2371.44
Nasal fluid	11	MF12	viral load (copies / mL)	<LOD
Nasal fluid	13	MF12	viral load (copies / mL)	16008.1
Nasal fluid	16	MF12	viral load (copies / mL)	N.D.
Nasal fluid	20	MF12	viral load (copies / mL)	N.D.
Nasal fluid	27	MF12	viral load (copies / mL)	N.D.
Tracheal fluid	0	MF9	viral load (copies / mL)	<LOD
Tracheal fluid	1	MF9	viral load (copies / mL)	1.86574e+07
Tracheal fluid	2	MF9	viral load (copies / mL)	1.55049e+08
Tracheal fluid	3	MF9	viral load (copies / mL)	4.9227e+07
Tracheal fluid	4	MF9	viral load (copies / mL)	2.63836e+07
Tracheal fluid	5	MF9	viral load (copies / mL)	884300
Tracheal fluid	7	MF9	viral load (copies / mL)	15168.1
Tracheal fluid	9	MF9	viral load (copies / mL)	<LOD
Tracheal fluid	11	MF9	viral load (copies / mL)	<LOD
Tracheal fluid	13	MF9	viral load (copies / mL)	<LOD
Tracheal fluid	16	MF9	viral load (copies / mL)	N.D.
Tracheal fluid	20	MF9	viral load (copies / mL)	N.D.
Tracheal fluid	27	MF9	viral load (copies / mL)	N.D.
Nasal fluid	0	MF9	viral load (copies / mL)	<LOD
Nasal fluid	1	MF9	viral load (copies / mL)	7.06725e+08
Nasal fluid	2	MF9	viral load (copies / mL)	N.D.
Nasal fluid	3	MF9	viral load (copies / mL)	8.97512e+07
Nasal fluid	4	MF9	viral load (copies / mL)	7.93479e+07
Nasal fluid	5	MF9	viral load (copies / mL)	1.27899e+08
Nasal fluid	7	MF9	viral load (copies / mL)	800068
Nasal fluid	9	MF9	viral load (copies / mL)	270155
Nasal fluid	11	MF9	viral load (copies / mL)	<LOD
Nasal fluid	13	MF9	viral load (copies / mL)	17830.3
Nasal fluid	16	MF9	viral load (copies / mL)	N.D.
Nasal fluid	20	MF9	viral load (copies / mL)	N.D.
Nasal fluid	27	MF9	viral load (copies / mL)	N.D.
Tracheal fluid	0	MF13	viral load (copies / mL)	<LOD
Tracheal fluid	1	MF13	viral load (copies / mL)	561435
Tracheal fluid	2	MF13	viral load (copies / mL)	1.96906e+07
Tracheal fluid	3	MF13	viral load (copies / mL)	1.0803e+06
Tracheal fluid	4	MF13	viral load (copies / mL)	235191
Tracheal fluid	5	MF13	viral load (copies / mL)	4742.18
Tracheal fluid	7	MF13	viral load (copies / mL)	<LOD
Tracheal fluid	9	MF13	viral load (copies / mL)	<LOD
Tracheal fluid	11	MF13	viral load (copies / mL)	<LOD
Tracheal fluid	13	MF13	viral load (copies / mL)	<LOD
Tracheal fluid	16	MF13	viral load (copies / mL)	N.D.
Tracheal fluid	20	MF13	viral load (copies / mL)	N.D.
Tracheal fluid	27	MF13	viral load (copies / mL)	N.D.
Nasal fluid	0	MF13	viral load (copies / mL)	<LOD
Nasal fluid	1	MF13	viral load (copies / mL)	1.58718e+07
Nasal fluid	2	MF13	viral load (copies / mL)	N.D.
Nasal fluid	3	MF13	viral load (copies / mL)	4.45379e+07
Nasal fluid	4	MF13	viral load (copies / mL)	8.7029e+07
Nasal fluid	5	MF13	viral load (copies / mL)	376191
Nasal fluid	7	MF13	viral load (copies / mL)	1.96962e+06
Nasal fluid	9	MF13	viral load (copies / mL)	57916.2
Nasal fluid	11	MF13	viral load (copies / mL)	<LOD
Nasal fluid	13	MF13	viral load (copies / mL)	1651.36
Nasal fluid	16	MF13	viral load (copies / mL)	N.D.
Nasal fluid	20	MF13	viral load (copies / mL)	N.D.
Nasal fluid	27	MF13	viral load (copies / mL)	N.D.
Tracheal fluid	0	MF15	viral load (copies / mL)	<LOD
Tracheal fluid	1	MF15	viral load (copies / mL)	376191
Tracheal fluid	2	MF15	viral load (copies / mL)	1.82313e+07
Tracheal fluid	3	MF15	viral load (copies / mL)	2.15967e+07
Tracheal fluid	4	MF15	viral load (copies / mL)	162519
Tracheal fluid	5	MF15	viral load (copies / mL)	<LOD
Tracheal fluid	7	MF15	viral load (copies / mL)	<LOD
Tracheal fluid	9	MF15	viral load (copies / mL)	<LOD
Tracheal fluid	11	MF15	viral load (copies / mL)	<LOD
Tracheal fluid	13	MF15	viral load (copies / mL)	<LOD
Tracheal fluid	16	MF15	viral load (copies / mL)	N.D.
Tracheal fluid	20	MF15	viral load (copies / mL)	N.D.
Tracheal fluid	27	MF15	viral load (copies / mL)	N.D.
Nasal fluid	0	MF15	viral load (copies / mL)	<LOD
Nasal fluid	1	MF15	viral load (copies / mL)	3.53616e+06
Nasal fluid	2	MF15	viral load (copies / mL)	N.D.
Nasal fluid	3	MF15	viral load (copies / mL)	1.319e+08
Nasal fluid	4	MF15	viral load (copies / mL)	211156
Nasal fluid	5	MF15	viral load (copies / mL)	18530.1
Nasal fluid	7	MF15	viral load (copies / mL)	<LOD
Nasal fluid	9	MF15	viral load (copies / mL)	<LOD
Nasal fluid	11	MF15	viral load (copies / mL)	<LOD
Nasal fluid	13	MF15	viral load (copies / mL)	<LOD
Nasal fluid	16	MF15	viral load (copies / mL)	N.D.
Nasal fluid	20	MF15	viral load (copies / mL)	N.D.
Nasal fluid	27	MF15	viral load (copies / mL)	N.D.
Tracheal fluid	0	MF17	viral load (copies / mL)	<LOD
Tracheal fluid	1	MF17	viral load (copies / mL)	2.61887e+06
Tracheal fluid	2	MF17	viral load (copies / mL)	1.14013e+06
Tracheal fluid	3	MF17	viral load (copies / mL)	3.03059e+07
Tracheal fluid	4	MF17	viral load (copies / mL)	250134
Tracheal fluid	5	MF17	viral load (copies / mL)	2264.37
Tracheal fluid	7	MF17	viral load (copies / mL)	<LOD
Tracheal fluid	9	MF17	viral load (copies / mL)	10321.2
Tracheal fluid	11	MF17	viral load (copies / mL)	<LOD
Tracheal fluid	13	MF17	viral load (copies / mL)	<LOD
Tracheal fluid	16	MF17	viral load (copies / mL)	N.D.
Tracheal fluid	20	MF17	viral load (copies / mL)	N.D.
Tracheal fluid	27	MF17	viral load (copies / mL)	N.D.
Nasal fluid	0	MF17	viral load (copies / mL)	<LOD
Nasal fluid	1	MF17	viral load (copies / mL)	2.59804e+07
Nasal fluid	2	MF17	viral load (copies / mL)	N.D.
Nasal fluid	3	MF17	viral load (copies / mL)	2.33254e+07
Nasal fluid	4	MF17	viral load (copies / mL)	701904
Nasal fluid	5	MF17	viral load (copies / mL)	7.81353e+07
Nasal fluid	7	MF17	viral load (copies / mL)	587982
Nasal fluid	9	MF17	viral load (copies / mL)	186680
Nasal fluid	11	MF17	viral load (copies / mL)	764.6
Nasal fluid	13	MF17	viral load (copies / mL)	<LOD
Nasal fluid	16	MF17	viral load (copies / mL)	N.D.
Nasal fluid	20	MF17	viral load (copies / mL)	N.D.
Nasal fluid	27	MF17	viral load (copies / mL)	N.D.
Tracheal fluid	0	MF18	viral load (copies / mL)	<LOD
Tracheal fluid	1	MF18	viral load (copies / mL)	1.38215e+06
Tracheal fluid	2	MF18	viral load (copies / mL)	1.18454e+07
Tracheal fluid	3	MF18	viral load (copies / mL)	1.55093e+07
Tracheal fluid	4	MF18	viral load (copies / mL)	507957
Tracheal fluid	5	MF18	viral load (copies / mL)	37054.8
Tracheal fluid	7	MF18	viral load (copies / mL)	30802.5
Tracheal fluid	9	MF18	viral load (copies / mL)	435.83
Tracheal fluid	11	MF18	viral load (copies / mL)	<LOD
Tracheal fluid	13	MF18	viral load (copies / mL)	<LOD
Tracheal fluid	16	MF18	viral load (copies / mL)	N.D.
Tracheal fluid	20	MF18	viral load (copies / mL)	N.D.
Tracheal fluid	27	MF18	viral load (copies / mL)	N.D.
Nasal fluid	0	MF18	viral load (copies / mL)	<LOD
Nasal fluid	1	MF18	viral load (copies / mL)	1.2598e+07
Nasal fluid	2	MF18	viral load (copies / mL)	N.D.
Nasal fluid	3	MF18	viral load (copies / mL)	1.4028e+08
Nasal fluid	4	MF18	viral load (copies / mL)	5.83306e+06
Nasal fluid	5	MF18	viral load (copies / mL)	6.59783e+06
Nasal fluid	7	MF18	viral load (copies / mL)	1.67555e+06
Nasal fluid	9	MF18	viral load (copies / mL)	32011.5
Nasal fluid	11	MF18	viral load (copies / mL)	<LOD
Nasal fluid	13	MF18	viral load (copies / mL)	<LOD
Nasal fluid	16	MF18	viral load (copies / mL)	N.D.
Nasal fluid	20	MF18	viral load (copies / mL)	N.D.
Nasal fluid	27	MF18	viral load (copies / mL)	N.D.
Tracheal fluid	0	MF7	viral load (copies / mL)	<LOD
Tracheal fluid	1	MF7	viral load (copies / mL)	6.59407e+08
Tracheal fluid	2	MF7	viral load (copies / mL)	88455.2
Tracheal fluid	3	MF7	viral load (copies / mL)	15885.3
Tracheal fluid	4	MF7	viral load (copies / mL)	N.D.
Tracheal fluid	5	MF7	viral load (copies / mL)	16008.1
Tracheal fluid	7	MF7	viral load (copies / mL)	752.91
Tracheal fluid	9	MF7	viral load (copies / mL)	<LOD
Tracheal fluid	11	MF7	viral load (copies / mL)	N.D.
Tracheal fluid	13	MF7	viral load (copies / mL)	<LOD
Tracheal fluid	16	MF7	viral load (copies / mL)	<LOD
Tracheal fluid	20	MF7	viral load (copies / mL)	<LOD
Tracheal fluid	27	MF7	viral load (copies / mL)	<LOD
Nasal fluid	0	MF7	viral load (copies / mL)	<LOD
Nasal fluid	1	MF7	viral load (copies / mL)	7.29038e+07
Nasal fluid	2	MF7	viral load (copies / mL)	3.14954e+07
Nasal fluid	3	MF7	viral load (copies / mL)	N.D.
Nasal fluid	4	MF7	viral load (copies / mL)	1.0803e+06
Nasal fluid	5	MF7	viral load (copies / mL)	477611
Nasal fluid	7	MF7	viral load (copies / mL)	6305.34
Nasal fluid	9	MF7	viral load (copies / mL)	<LOD
Nasal fluid	11	MF7	viral load (copies / mL)	N.D.
Nasal fluid	13	MF7	viral load (copies / mL)	<LOD
Nasal fluid	16	MF7	viral load (copies / mL)	<LOD
Nasal fluid	20	MF7	viral load (copies / mL)	<LOD
Nasal fluid	27	MF7	viral load (copies / mL)	<LOD
Tracheal fluid	0	MF16	viral load (copies / mL)	<LOD
Tracheal fluid	1	MF16	viral load (copies / mL)	103980
Tracheal fluid	2	MF16	viral load (copies / mL)	933272
Tracheal fluid	3	MF16	viral load (copies / mL)	36770.5
Tracheal fluid	4	MF16	viral load (copies / mL)	N.D.
Tracheal fluid	5	MF16	viral load (copies / mL)	20168
Tracheal fluid	7	MF16	viral load (copies / mL)	<LOD
Tracheal fluid	9	MF16	viral load (copies / mL)	<LOD
Tracheal fluid	11	MF16	viral load (copies / mL)	N.D.
Tracheal fluid	13	MF16	viral load (copies / mL)	<LOD
Tracheal fluid	16	MF16	viral load (copies / mL)	<LOD
Tracheal fluid	20	MF16	viral load (copies / mL)	<LOD
Tracheal fluid	27	MF16	viral load (copies / mL)	<LOD
Nasal fluid	0	MF16	viral load (copies / mL)	<LOD
Nasal fluid	1	MF16	viral load (copies / mL)	32011.5
Nasal fluid	2	MF16	viral load (copies / mL)	409443
Nasal fluid	3	MF16	viral load (copies / mL)	N.D.
Nasal fluid	4	MF16	viral load (copies / mL)	2080.48
Nasal fluid	5	MF16	viral load (copies / mL)	16894.6
Nasal fluid	7	MF16	viral load (copies / mL)	7355.12
Nasal fluid	9	MF16	viral load (copies / mL)	<LOD
Nasal fluid	11	MF16	viral load (copies / mL)	N.D.
Nasal fluid	13	MF16	viral load (copies / mL)	<LOD
Nasal fluid	16	MF16	viral load (copies / mL)	<LOD
Nasal fluid	20	MF16	viral load (copies / mL)	<LOD
Nasal fluid	27	MF16	viral load (copies / mL)	<LOD
Tracheal fluid	0	MF8	viral load (copies / mL)	<LOD
Tracheal fluid	1	MF8	viral load (copies / mL)	1.76834e+06
Tracheal fluid	2	MF8	viral load (copies / mL)	9.61915e+07
Tracheal fluid	3	MF8	viral load (copies / mL)	1.75378e+08
Tracheal fluid	4	MF8	viral load (copies / mL)	5.00052e+06
Tracheal fluid	5	MF8	viral load (copies / mL)	19859.8
Tracheal fluid	7	MF8	viral load (copies / mL)	<LOD
Tracheal fluid	9	MF8	viral load (copies / mL)	272.48
Tracheal fluid	11	MF8	viral load (copies / mL)	<LOD
Tracheal fluid	13	MF8	viral load (copies / mL)	<LOD
Tracheal fluid	16	MF8	viral load (copies / mL)	N.D.
Tracheal fluid	20	MF8	viral load (copies / mL)	N.D.
Tracheal fluid	27	MF8	viral load (copies / mL)	N.D.
Nasal fluid	0	MF8	viral load (copies / mL)	<LOD
Nasal fluid	1	MF8	viral load (copies / mL)	8.7029e+07
Nasal fluid	2	MF8	viral load (copies / mL)	N.D.
Nasal fluid	3	MF8	viral load (copies / mL)	3.17298e+08
Nasal fluid	4	MF8	viral load (copies / mL)	7.40353e+07
Nasal fluid	5	MF8	viral load (copies / mL)	5.87815e+06
Nasal fluid	7	MF8	viral load (copies / mL)	373305
Nasal fluid	9	MF8	viral load (copies / mL)	13936.3
Nasal fluid	11	MF8	viral load (copies / mL)	<LOD
Nasal fluid	13	MF8	viral load (copies / mL)	<LOD
Nasal fluid	16	MF8	viral load (copies / mL)	N.D.
Nasal fluid	20	MF8	viral load (copies / mL)	N.D.
Nasal fluid	27	MF8	viral load (copies / mL)	N.D.
