# Supplementary material for: Modelling the response to vaccine in non-human primates to define SARS-CoV-2 mechanistic correlates of protection
Source: eLife. 2022 Jul 8;11:e75427. doi: 10.7554/eLife.75427 (PMC9282856; doi:10.7554/eLife.75427)
Supplement: Figure 1—source data 3. [file elife-75427-fig1-data3.xlsx]

## Sheet: Feuil1
Figure 1 - figure supplement 1D and 3A
Study [Marlin, 2021]
Assay	Week post immunisation	Group	Animal ID	Value (relative MFI to negative signal)
IgG Spike Luminex	0	Naive	MF1	0.38
IgG Spike Luminex	2	Naive	MF1	0.38
IgG Spike Luminex	4	Naive	MF1	0.55
IgG Spike Luminex	4.6	Naive	MF1	0.68
IgG Spike Luminex	5.3	Naive	MF1	15.51
IgG Spike Luminex	6	Naive	MF1	80.14
IgG Spike Luminex	6.9	Naive	MF1	63.64
IgG Spike Luminex	0	Naive	MF2	3
IgG Spike Luminex	2	Naive	MF2	3.25
IgG Spike Luminex	4	Naive	MF2	4.3
IgG Spike Luminex	4.6	Naive	MF2	3.05
IgG Spike Luminex	5.3	Naive	MF2	10.55
IgG Spike Luminex	6	Naive	MF2	81.41
IgG Spike Luminex	6.9	Naive	MF2	95.43
IgG Spike Luminex	0	Naive	MF3	0.37
IgG Spike Luminex	2	Naive	MF3	0.2
IgG Spike Luminex	4	Naive	MF3	0.19
IgG Spike Luminex	4.6	Naive	MF3	0.57
IgG Spike Luminex	5.3	Naive	MF3	8.73
IgG Spike Luminex	6	Naive	MF3	146.51
IgG Spike Luminex	6.9	Naive	MF3	334.08
IgG Spike Luminex	0	Naive	MF4	0.36
IgG Spike Luminex	2	Naive	MF4	0.26
IgG Spike Luminex	4	Naive	MF4	0.59
IgG Spike Luminex	4.6	Naive	MF4	0.75
IgG Spike Luminex	5.3	Naive	MF4	6.85
IgG Spike Luminex	6	Naive	MF4	21.49
IgG Spike Luminex	6.9	Naive	MF4	23.51
IgG Spike Luminex	0	Naive	MF5	0.2
IgG Spike Luminex	2	Naive	MF5	0.17
IgG Spike Luminex	4	Naive	MF5	0.15
IgG Spike Luminex	4.6	Naive	MF5	0.49
IgG Spike Luminex	5.3	Naive	MF5	3.68
IgG Spike Luminex	6	Naive	MF5	48.89
IgG Spike Luminex	6.9	Naive	MF5	55.78
IgG Spike Luminex	0	Naive	MF6	1.15
IgG Spike Luminex	2	Naive	MF6	1.91
IgG Spike Luminex	4	Naive	MF6	1.12
IgG Spike Luminex	4.6	Naive	MF6	1.54
IgG Spike Luminex	5.3	Naive	MF6	16.62
IgG Spike Luminex	6	Naive	MF6	80.8
IgG Spike Luminex	6.9	Naive	MF6	93.67
IgG Spike Luminex	-24.6	Conv.	MF7	0.431585
IgG Spike Luminex	-23.6	Conv.	MF7	10.8643
IgG Spike Luminex	-22.7	Conv.	MF7	162.86
IgG Spike Luminex	-21.9	Conv.	MF7	230.408
IgG Spike Luminex	-20.9	Conv.	MF7	117.117
IgG Spike Luminex	-19.9	Conv.	MF7	106.433
IgG Spike Luminex	-18.9	Conv.	MF7	95.8702
IgG Spike Luminex	-17.9	Conv.	MF7	74.5749
IgG Spike Luminex	-14.9	Conv.	MF7	40.6858
IgG Spike Luminex	0	Conv.	MF7	93.0276
IgG Spike Luminex	2	Conv.	MF7	90.0535
IgG Spike Luminex	4	Conv.	MF7	92.106
IgG Spike Luminex	4.6	Conv.	MF7	107.523
IgG Spike Luminex	5.3	Conv.	MF7	1239.43
IgG Spike Luminex	6	Conv.	MF7	1419.14
IgG Spike Luminex	6.9	Conv.	MF7	1042.54
IgG Spike Luminex	-24.6	Conv.	MF8	0.707409
IgG Spike Luminex	-23.6	Conv.	MF8	4.13088
IgG Spike Luminex	-22.7	Conv.	MF8	101.87
IgG Spike Luminex	-21.9	Conv.	MF8	167.422
IgG Spike Luminex	-20.9	Conv.	MF8	247.468
IgG Spike Luminex	-19.9	Conv.	MF8	237.441
IgG Spike Luminex	-18.9	Conv.	MF8	281.346
IgG Spike Luminex	-17.9	Conv.	MF8	227.268
IgG Spike Luminex	-14.9	Conv.	MF8	148.274
IgG Spike Luminex	0	Conv.	MF8	146.14
IgG Spike Luminex	2	Conv.	MF8	146.89
IgG Spike Luminex	4	Conv.	MF8	128.401
IgG Spike Luminex	4.6	Conv.	MF8	141.961
IgG Spike Luminex	5.3	Conv.	MF8	1412.1
IgG Spike Luminex	6	Conv.	MF8	1381.4
IgG Spike Luminex	6.9	Conv.	MF8	1174.19
IgG Spike Luminex	-24.6	Conv.	MF9	0.15576
IgG Spike Luminex	-23.6	Conv.	MF9	1.12115
IgG Spike Luminex	-22.7	Conv.	MF9	47.4597
IgG Spike Luminex	-21.9	Conv.	MF9	52.3548
IgG Spike Luminex	-20.9	Conv.	MF9	101.005
IgG Spike Luminex	-19.9	Conv.	MF9	90.4916
IgG Spike Luminex	-18.9	Conv.	MF9	106.7
IgG Spike Luminex	-17.9	Conv.	MF9	103.975
IgG Spike Luminex	-14.9	Conv.	MF9	64.6339
IgG Spike Luminex	0	Conv.	MF9	59.0362
IgG Spike Luminex	2	Conv.	MF9	60.9865
IgG Spike Luminex	4	Conv.	MF9	56.6382
IgG Spike Luminex	4.6	Conv.	MF9	75.6896
IgG Spike Luminex	5.3	Conv.	MF9	949.21
IgG Spike Luminex	6	Conv.	MF9	930.836
IgG Spike Luminex	6.9	Conv.	MF9	822.996
IgG Spike Luminex	-24.6	Conv.	MF10	0.902109
IgG Spike Luminex	-23.6	Conv.	MF10	1.63223
IgG Spike Luminex	-22.7	Conv.	MF10	37.9275
IgG Spike Luminex	-21.9	Conv.	MF10	87.5955
IgG Spike Luminex	-20.9	Conv.	MF10	44.1774
IgG Spike Luminex	-19.9	Conv.	MF10	34.9535
IgG Spike Luminex	-18.9	Conv.	MF10	38.7258
IgG Spike Luminex	-17.9	Conv.	MF10	37.1682
IgG Spike Luminex	-14.9	Conv.	MF10	19.5527
IgG Spike Luminex	0	Conv.	MF10	19.4473
IgG Spike Luminex	2	Conv.	MF10	24.5533
IgG Spike Luminex	4	Conv.	MF10	21.6977
IgG Spike Luminex	4.6	Conv.	MF10	23.51
IgG Spike Luminex	5.3	Conv.	MF10	873.375
IgG Spike Luminex	6	Conv.	MF10	1026.34
IgG Spike Luminex	6.9	Conv.	MF10	862.35
IgG Spike Luminex	-24.6	Conv.	MF11	0.269335
IgG Spike Luminex	-23.6	Conv.	MF11	10.2477
IgG Spike Luminex	-22.7	Conv.	MF11	101.822
IgG Spike Luminex	-21.9	Conv.	MF11	82.7036
IgG Spike Luminex	-20.9	Conv.	MF11	91.4164
IgG Spike Luminex	-19.9	Conv.	MF11	88.2526
IgG Spike Luminex	-18.9	Conv.	MF11	84.5776
IgG Spike Luminex	-17.9	Conv.	MF11	77.2034
IgG Spike Luminex	-14.9	Conv.	MF11	56.9189
IgG Spike Luminex	0	Conv.	MF11	86.0671
IgG Spike Luminex	2	Conv.	MF11	106.141
IgG Spike Luminex	4	Conv.	MF11	95.1076
IgG Spike Luminex	4.6	Conv.	MF11	93.5046
IgG Spike Luminex	5.3	Conv.	MF11	742.074
IgG Spike Luminex	6	Conv.	MF11	713.77
IgG Spike Luminex	6.9	Conv.	MF11	706.541
IgG Spike Luminex	-24.6	Conv.	MF12	0.171985
IgG Spike Luminex	-23.6	Conv.	MF12	1.25095
IgG Spike Luminex	-22.7	Conv.	MF12	111.565
IgG Spike Luminex	-21.9	Conv.	MF12	127.947
IgG Spike Luminex	-20.9	Conv.	MF12	121.838
IgG Spike Luminex	-19.9	Conv.	MF12	90.7837
IgG Spike Luminex	-18.9	Conv.	MF12	86.3299
IgG Spike Luminex	-17.9	Conv.	MF12	66.2028
IgG Spike Luminex	-14.9	Conv.	MF12	40.7345
IgG Spike Luminex	0	Conv.	MF12	50.0395
IgG Spike Luminex	2	Conv.	MF12	41.9627
IgG Spike Luminex	4	Conv.	MF12	14.5668
IgG Spike Luminex	4.6	Conv.	MF12	49.2104
IgG Spike Luminex	5.3	Conv.	MF12	1782.06
IgG Spike Luminex	6	Conv.	MF12	1660.81
IgG Spike Luminex	6.9	Conv.	MF12	1357.16
IgG Spike Luminex	-24.6	αCD40.RBD	MF13	0.12331
IgG Spike Luminex	-23.6	αCD40.RBD	MF13	0.910222
IgG Spike Luminex	-22.7	αCD40.RBD	MF13	182.127
IgG Spike Luminex	-21.9	αCD40.RBD	MF13	236.224
IgG Spike Luminex	-20.9	αCD40.RBD	MF13	233.645
IgG Spike Luminex	-19.9	αCD40.RBD	MF13	249.74
IgG Spike Luminex	-18.9	αCD40.RBD	MF13	259.053
IgG Spike Luminex	-17.9	αCD40.RBD	MF13	402.798
IgG Spike Luminex	-14.9	αCD40.RBD	MF13	246.346
IgG Spike Luminex	0	αCD40.RBD	MF13	161.246
IgG Spike Luminex	2	αCD40.RBD	MF13	2388.73
IgG Spike Luminex	4	αCD40.RBD	MF13	2277.23
IgG Spike Luminex	4.6	αCD40.RBD	MF13	2300.18
IgG Spike Luminex	5.3	αCD40.RBD	MF13	2118.62
IgG Spike Luminex	6	αCD40.RBD	MF13	2103.42
IgG Spike Luminex	6.9	αCD40.RBD	MF13	1979.37
IgG Spike Luminex	-24.6	αCD40.RBD	MF14	1.30773
IgG Spike Luminex	-23.6	αCD40.RBD	MF14	8.43862
IgG Spike Luminex	-22.7	αCD40.RBD	MF14	97.5949
IgG Spike Luminex	-21.9	αCD40.RBD	MF14	49.6777
IgG Spike Luminex	-20.9	αCD40.RBD	MF14	91.3921
IgG Spike Luminex	-19.9	αCD40.RBD	MF14	98.888
IgG Spike Luminex	-18.9	αCD40.RBD	MF14	141.016
IgG Spike Luminex	-17.9	αCD40.RBD	MF14	143.061
IgG Spike Luminex	-14.9	αCD40.RBD	MF14	125.737
IgG Spike Luminex	0	αCD40.RBD	MF14	131.805
IgG Spike Luminex	2	αCD40.RBD	MF14	1524.03
IgG Spike Luminex	4	αCD40.RBD	MF14	918.759
IgG Spike Luminex	4.6	αCD40.RBD	MF14	974.059
IgG Spike Luminex	5.3	αCD40.RBD	MF14	909.224
IgG Spike Luminex	6	αCD40.RBD	MF14	874.762
IgG Spike Luminex	6.9	αCD40.RBD	MF14	867.023
IgG Spike Luminex	-24.6	αCD40.RBD	MF15	1.18605
IgG Spike Luminex	-23.6	αCD40.RBD	MF15	6.10222
IgG Spike Luminex	-22.7	αCD40.RBD	MF15	92.5165
IgG Spike Luminex	-21.9	αCD40.RBD	MF15	153.38
IgG Spike Luminex	-20.9	αCD40.RBD	MF15	143.328
IgG Spike Luminex	-19.9	αCD40.RBD	MF15	111.008
IgG Spike Luminex	-18.9	αCD40.RBD	MF15	94.702
IgG Spike Luminex	-17.9	αCD40.RBD	MF15	90.7107
IgG Spike Luminex	-14.9	αCD40.RBD	MF15	62.2893
IgG Spike Luminex	0	αCD40.RBD	MF15	93.4251
IgG Spike Luminex	2	αCD40.RBD	MF15	942.342
IgG Spike Luminex	4	αCD40.RBD	MF15	498.865
IgG Spike Luminex	4.6	αCD40.RBD	MF15	441.798
IgG Spike Luminex	5.3	αCD40.RBD	MF15	629.367
IgG Spike Luminex	6	αCD40.RBD	MF15	609.07
IgG Spike Luminex	6.9	αCD40.RBD	MF15	563.437
IgG Spike Luminex	-24.6	αCD40.RBD	MF16	0.407247
IgG Spike Luminex	-23.6	αCD40.RBD	MF16	0.601947
IgG Spike Luminex	-22.7	αCD40.RBD	MF16	20.7696
IgG Spike Luminex	-21.9	αCD40.RBD	MF16	24.8534
IgG Spike Luminex	-20.9	αCD40.RBD	MF16	27.4575
IgG Spike Luminex	-19.9	αCD40.RBD	MF16	26.5084
IgG Spike Luminex	-18.9	αCD40.RBD	MF16	27.993
IgG Spike Luminex	-17.9	αCD40.RBD	MF16	24.9508
IgG Spike Luminex	-14.9	αCD40.RBD	MF16	26.0265
IgG Spike Luminex	0	αCD40.RBD	MF16	27.7626
IgG Spike Luminex	2	αCD40.RBD	MF16	163.957
IgG Spike Luminex	4	αCD40.RBD	MF16	147.018
IgG Spike Luminex	4.6	αCD40.RBD	MF16	175.668
IgG Spike Luminex	5.3	αCD40.RBD	MF16	498.748
IgG Spike Luminex	6	αCD40.RBD	MF16	455.89
IgG Spike Luminex	6.9	αCD40.RBD	MF16	521.236
IgG Spike Luminex	-24.6	αCD40.RBD	MF17	0.610059
IgG Spike Luminex	-23.6	αCD40.RBD	MF17	0.391022
IgG Spike Luminex	-22.7	αCD40.RBD	MF17	74.8394
IgG Spike Luminex	-21.9	αCD40.RBD	MF17	85.7945
IgG Spike Luminex	-20.9	αCD40.RBD	MF17	76.8626
IgG Spike Luminex	-19.9	αCD40.RBD	MF17	65.351
IgG Spike Luminex	-18.9	αCD40.RBD	MF17	57.0519
IgG Spike Luminex	-17.9	αCD40.RBD	MF17	38.8962
IgG Spike Luminex	-14.9	αCD40.RBD	MF17	28.1844
IgG Spike Luminex	0	αCD40.RBD	MF17	69.8745
IgG Spike Luminex	2	αCD40.RBD	MF17	829.027
IgG Spike Luminex	4	αCD40.RBD	MF17	698.627
IgG Spike Luminex	4.6	αCD40.RBD	MF17	800.216
IgG Spike Luminex	5.3	αCD40.RBD	MF17	991.801
IgG Spike Luminex	6	αCD40.RBD	MF17	1024.44
IgG Spike Luminex	6.9	αCD40.RBD	MF17	460.197
IgG Spike Luminex	-24.6	αCD40.RBD	MF18	4.14711
IgG Spike Luminex	-23.6	αCD40.RBD	MF18	7.3921
IgG Spike Luminex	-22.7	αCD40.RBD	MF18	105.245
IgG Spike Luminex	-21.9	αCD40.RBD	MF18	104.997
IgG Spike Luminex	-20.9	αCD40.RBD	MF18	95.1401
IgG Spike Luminex	-19.9	αCD40.RBD	MF18	83.7745
IgG Spike Luminex	-18.9	αCD40.RBD	MF18	85.4051
IgG Spike Luminex	-17.9	αCD40.RBD	MF18	85.3564
IgG Spike Luminex	-14.9	αCD40.RBD	MF18	120.991
IgG Spike Luminex	0	αCD40.RBD	MF18	129.339
IgG Spike Luminex	2	αCD40.RBD	MF18	788.213
IgG Spike Luminex	4	αCD40.RBD	MF18	486.891
IgG Spike Luminex	4.6	αCD40.RBD	MF18	577.893
IgG Spike Luminex	5.3	αCD40.RBD	MF18	566.065
IgG Spike Luminex	6	αCD40.RBD	MF18	513.862
IgG Spike Luminex	6.9	αCD40.RBD	MF18	1008.96
