# Supplementary material for: Modelling the response to vaccine in non-human primates to define SARS-CoV-2 mechanistic correlates of protection
Source: eLife. 2022 Jul 8;11:e75427. doi: 10.7554/eLife.75427 (PMC9282856; doi:10.7554/eLife.75427)
Supplement: Figure 1—source data 4. [file elife-75427-fig1-data4.xlsx]

## Sheet: Feuil1
Figure - figure supplement 1C
Study [Marlin, 2021]
Assay	Week post imm	Group	Animal ID	Value (AU)
ACE-2 binding inhibition Spike	0	Naive	MF1	1.0637e-06
ACE-2 binding inhibition Spike	2	Naive	MF1	1.05611e-06
ACE-2 binding inhibition Spike	4	Naive	MF1	1.19106e-06
ACE-2 binding inhibition Spike	4.6	Naive	MF1	1.13227e-06
ACE-2 binding inhibition Spike	5.3	Naive	MF1	2.78905e-06
ACE-2 binding inhibition Spike	6.9	Naive	MF1	2.59373e-06
ACE-2 binding inhibition Spike	0	Naive	MF2	1.0909e-06
ACE-2 binding inhibition Spike	2	Naive	MF2	1.1236e-06
ACE-2 binding inhibition Spike	4	Naive	MF2	1.2072e-06
ACE-2 binding inhibition Spike	4.6	Naive	MF2	1.1639e-06
ACE-2 binding inhibition Spike	5.3	Naive	MF2	1.7005e-06
ACE-2 binding inhibition Spike	6.9	Naive	MF2	3.923e-06
ACE-2 binding inhibition Spike	0	Naive	MF3	1.015e-06
ACE-2 binding inhibition Spike	2	Naive	MF3	9.9477e-07
ACE-2 binding inhibition Spike	4	Naive	MF3	1.0958e-06
ACE-2 binding inhibition Spike	4.6	Naive	MF3	1.0639e-06
ACE-2 binding inhibition Spike	5.3	Naive	MF3	1.5579e-06
ACE-2 binding inhibition Spike	6.9	Naive	MF3	9.5202e-05
ACE-2 binding inhibition Spike	0	Naive	MF4	1.0415e-06
ACE-2 binding inhibition Spike	2	Naive	MF4	1.0464e-06
ACE-2 binding inhibition Spike	4	Naive	MF4	1.1608e-06
ACE-2 binding inhibition Spike	4.6	Naive	MF4	1.086e-06
ACE-2 binding inhibition Spike	5.3	Naive	MF4	1.3334e-06
ACE-2 binding inhibition Spike	6.9	Naive	MF4	1.5592e-06
ACE-2 binding inhibition Spike	0	Naive	MF5	1.1747e-06
ACE-2 binding inhibition Spike	2	Naive	MF5	1.1192e-06
ACE-2 binding inhibition Spike	4	Naive	MF5	1.316e-06
ACE-2 binding inhibition Spike	4.6	Naive	MF5	1.1524e-06
ACE-2 binding inhibition Spike	5.3	Naive	MF5	1.5793e-06
ACE-2 binding inhibition Spike	6.9	Naive	MF5	3.1108e-06
ACE-2 binding inhibition Spike	0	Naive	MF6	1.1211e-06
ACE-2 binding inhibition Spike	2	Naive	MF6	1.1434e-06
ACE-2 binding inhibition Spike	4	Naive	MF6	1.228e-06
ACE-2 binding inhibition Spike	4.6	Naive	MF6	1.1499e-06
ACE-2 binding inhibition Spike	5.3	Naive	MF6	1.529e-06
ACE-2 binding inhibition Spike	6.9	Naive	MF6	3.7602e-06
ACE-2 binding inhibition Spike	-24.6	Conv.	MF7	1.00267e-06
ACE-2 binding inhibition Spike	-22.7	Conv.	MF7	2.17581e-05
ACE-2 binding inhibition Spike	-21.9	Conv.	MF7	1.21212e-05
ACE-2 binding inhibition Spike	-18.9	Conv.	MF7	3.31428e-06
ACE-2 binding inhibition Spike	0	Conv.	MF7	2.8827e-06
ACE-2 binding inhibition Spike	2	Conv.	MF7	2.2262e-06
ACE-2 binding inhibition Spike	4	Conv.	MF7	2.3362e-06
ACE-2 binding inhibition Spike	4.6	Conv.	MF7	2.5879e-06
ACE-2 binding inhibition Spike	5.3	Conv.	MF7	0.0153846
ACE-2 binding inhibition Spike	6.9	Conv.	MF7	0.0212766
ACE-2 binding inhibition Spike	-24.6	Conv.	MF8	1.24369e-06
ACE-2 binding inhibition Spike	-22.7	Conv.	MF8	4.06218e-06
ACE-2 binding inhibition Spike	-21.9	Conv.	MF8	5.46538e-06
ACE-2 binding inhibition Spike	-18.9	Conv.	MF8	8.02761e-06
ACE-2 binding inhibition Spike	0	Conv.	MF8	3.5432e-06
ACE-2 binding inhibition Spike	2	Conv.	MF8	3.7371e-06
ACE-2 binding inhibition Spike	4	Conv.	MF8	2.58564e-06
ACE-2 binding inhibition Spike	4.6	Conv.	MF8	2.99791e-06
ACE-2 binding inhibition Spike	5.3	Conv.	MF8	0.00961539
ACE-2 binding inhibition Spike	6.9	Conv.	MF8	0.0172414
ACE-2 binding inhibition Spike	-24.6	Conv.	MF9	1.22235e-06
ACE-2 binding inhibition Spike	-22.7	Conv.	MF9	2.66008e-06
ACE-2 binding inhibition Spike	-21.9	Conv.	MF9	2.10893e-06
ACE-2 binding inhibition Spike	-18.9	Conv.	MF9	3.49256e-06
ACE-2 binding inhibition Spike	0	Conv.	MF9	1.7559e-06
ACE-2 binding inhibition Spike	2	Conv.	MF9	1.5702e-06
ACE-2 binding inhibition Spike	4	Conv.	MF9	1.5589e-06
ACE-2 binding inhibition Spike	4.6	Conv.	MF9	2.4716e-06
ACE-2 binding inhibition Spike	5.3	Conv.	MF9	0.00653595
ACE-2 binding inhibition Spike	6.9	Conv.	MF9	0.00862069
ACE-2 binding inhibition Spike	-24.6	Conv.	MF10	1.15249e-06
ACE-2 binding inhibition Spike	-22.7	Conv.	MF10	2.78438e-06
ACE-2 binding inhibition Spike	-21.9	Conv.	MF10	4.06364e-06
ACE-2 binding inhibition Spike	-18.9	Conv.	MF10	1.46783e-06
ACE-2 binding inhibition Spike	0	Conv.	MF10	1.2719e-06
ACE-2 binding inhibition Spike	2	Conv.	MF10	1.1695e-06
ACE-2 binding inhibition Spike	4	Conv.	MF10	1.235e-06
ACE-2 binding inhibition Spike	4.6	Conv.	MF10	1.2676e-06
ACE-2 binding inhibition Spike	5.3	Conv.	MF10	0.00877193
ACE-2 binding inhibition Spike	6.9	Conv.	MF10	0.00621118
ACE-2 binding inhibition Spike	-24.6	Conv.	MF11	1.59933e-06
ACE-2 binding inhibition Spike	-22.7	Conv.	MF11	5.30405e-06
ACE-2 binding inhibition Spike	-21.9	Conv.	MF11	4.15464e-06
ACE-2 binding inhibition Spike	-18.9	Conv.	MF11	3.01441e-06
ACE-2 binding inhibition Spike	0	Conv.	MF11	2.582e-06
ACE-2 binding inhibition Spike	2	Conv.	MF11	2.3299e-06
ACE-2 binding inhibition Spike	4	Conv.	MF11	2.3299e-06
ACE-2 binding inhibition Spike	4.6	Conv.	MF11	2.0895e-06
ACE-2 binding inhibition Spike	5.3	Conv.	MF11	0.00502513
ACE-2 binding inhibition Spike	6.9	Conv.	MF11	0.00724638
ACE-2 binding inhibition Spike	-24.6	Conv.	MF12	1.30519e-06
ACE-2 binding inhibition Spike	-22.7	Conv.	MF12	1.62153e-05
ACE-2 binding inhibition Spike	-21.9	Conv.	MF12	1.1026e-05
ACE-2 binding inhibition Spike	-18.9	Conv.	MF12	4.08988e-06
ACE-2 binding inhibition Spike	0	Conv.	MF12	2.0054e-06
ACE-2 binding inhibition Spike	2	Conv.	MF12	1.6715e-06
ACE-2 binding inhibition Spike	4	Conv.	MF12	1.896e-06
ACE-2 binding inhibition Spike	4.6	Conv.	MF12	2.179e-06
ACE-2 binding inhibition Spike	5.3	Conv.	MF12	0.0125
ACE-2 binding inhibition Spike	6.9	Conv.	MF12	0.0106383
ACE-2 binding inhibition Spike	-24.6	αCD40.RBD	MF13	1.15726e-06
ACE-2 binding inhibition Spike	-22.7	αCD40.RBD	MF13	0.000124828
ACE-2 binding inhibition Spike	-21.9	αCD40.RBD	MF13	8.04699e-05
ACE-2 binding inhibition Spike	-18.9	αCD40.RBD	MF13	0.003367
ACE-2 binding inhibition Spike	0	αCD40.RBD	MF13	3.1032e-05
ACE-2 binding inhibition Spike	2	αCD40.RBD	MF13	0.0243902
ACE-2 binding inhibition Spike	4	αCD40.RBD	MF13	0.016129
ACE-2 binding inhibition Spike	4.6	αCD40.RBD	MF13	0.0192308
ACE-2 binding inhibition Spike	5.3	αCD40.RBD	MF13	0.0135135
ACE-2 binding inhibition Spike	6.9	αCD40.RBD	MF13	0.027027
ACE-2 binding inhibition Spike	-24.6	αCD40.RBD	MF14	1.27666e-06
ACE-2 binding inhibition Spike	-22.7	αCD40.RBD	MF14	5.11381e-06
ACE-2 binding inhibition Spike	-21.9	αCD40.RBD	MF14	2.72728e-06
ACE-2 binding inhibition Spike	-18.9	αCD40.RBD	MF14	6.29846e-06
ACE-2 binding inhibition Spike	0	αCD40.RBD	MF14	3.6454e-06
ACE-2 binding inhibition Spike	2	αCD40.RBD	MF14	0.0166667
ACE-2 binding inhibition Spike	4	αCD40.RBD	MF14	0.0138889
ACE-2 binding inhibition Spike	4.6	αCD40.RBD	MF14	0.0117647
ACE-2 binding inhibition Spike	5.3	αCD40.RBD	MF14	0.00806452
ACE-2 binding inhibition Spike	6.9	αCD40.RBD	MF14	0.0111111
ACE-2 binding inhibition Spike	-24.6	αCD40.RBD	MF15	2.37993e-06
ACE-2 binding inhibition Spike	-22.7	αCD40.RBD	MF15	4.6151e-05
ACE-2 binding inhibition Spike	-21.9	αCD40.RBD	MF15	2.49526e-05
ACE-2 binding inhibition Spike	-18.9	αCD40.RBD	MF15	9.15826e-06
ACE-2 binding inhibition Spike	0	αCD40.RBD	MF15	1.0133e-05
ACE-2 binding inhibition Spike	2	αCD40.RBD	MF15	0.0135135
ACE-2 binding inhibition Spike	4	αCD40.RBD	MF15	0.0147059
ACE-2 binding inhibition Spike	4.6	αCD40.RBD	MF15	0.00617284
ACE-2 binding inhibition Spike	5.3	αCD40.RBD	MF15	0.00653595
ACE-2 binding inhibition Spike	6.9	αCD40.RBD	MF15	0.00606061
ACE-2 binding inhibition Spike	-24.6	αCD40.RBD	MF16	1.12704e-06
ACE-2 binding inhibition Spike	-22.7	αCD40.RBD	MF16	2.60601e-06
ACE-2 binding inhibition Spike	-21.9	αCD40.RBD	MF16	1.85674e-06
ACE-2 binding inhibition Spike	-18.9	αCD40.RBD	MF16	1.48888e-06
ACE-2 binding inhibition Spike	0	αCD40.RBD	MF16	1.1802e-06
ACE-2 binding inhibition Spike	2	αCD40.RBD	MF16	0.00025452
ACE-2 binding inhibition Spike	4	αCD40.RBD	MF16	0.00025019
ACE-2 binding inhibition Spike	4.6	αCD40.RBD	MF16	0.00010342
ACE-2 binding inhibition Spike	5.3	αCD40.RBD	MF16	0.0004207
ACE-2 binding inhibition Spike	6.9	αCD40.RBD	MF16	0.00181818
ACE-2 binding inhibition Spike	-24.6	αCD40.RBD	MF17	1.25235e-06
ACE-2 binding inhibition Spike	-22.7	αCD40.RBD	MF17	4.95371e-06
ACE-2 binding inhibition Spike	-21.9	αCD40.RBD	MF17	4.03587e-06
ACE-2 binding inhibition Spike	-18.9	αCD40.RBD	MF17	2.23159e-06
ACE-2 binding inhibition Spike	0	αCD40.RBD	MF17	1.5256e-06
ACE-2 binding inhibition Spike	2	αCD40.RBD	MF17	0.0135135
ACE-2 binding inhibition Spike	4	αCD40.RBD	MF17	0.00970874
ACE-2 binding inhibition Spike	4.6	αCD40.RBD	MF17	0.0123457
ACE-2 binding inhibition Spike	5.3	αCD40.RBD	MF17	0.00917431
ACE-2 binding inhibition Spike	6.9	αCD40.RBD	MF17	0.0107527
ACE-2 binding inhibition Spike	-24.6	αCD40.RBD	MF18	1.16425e-06
ACE-2 binding inhibition Spike	-22.7	αCD40.RBD	MF18	5.78918e-06
ACE-2 binding inhibition Spike	-21.9	αCD40.RBD	MF18	4.22226e-06
ACE-2 binding inhibition Spike	-18.9	αCD40.RBD	MF18	2.93714e-06
ACE-2 binding inhibition Spike	0	αCD40.RBD	MF18	3.3702e-06
ACE-2 binding inhibition Spike	2	αCD40.RBD	MF18	0.0121951
ACE-2 binding inhibition Spike	4	αCD40.RBD	MF18	0.00990099
ACE-2 binding inhibition Spike	4.6	αCD40.RBD	MF18	0.0075188
ACE-2 binding inhibition Spike	5.3	αCD40.RBD	MF18	0.00561798
ACE-2 binding inhibition Spike	6.9	αCD40.RBD	MF18	0.00555556
