# Supplementary material for: Modelling the response to vaccine in non-human primates to define SARS-CoV-2 mechanistic correlates of protection
Source: eLife. 2022 Jul 8;11:e75427. doi: 10.7554/eLife.75427 (PMC9282856; doi:10.7554/eLife.75427)
Supplement: Figure 1—source data 5. [file elife-75427-fig1-data5.xlsx]

## Sheet: Feuil1
Figure 1 - figure Supplement 1E and 3D
Study [Marlin, 2021]
Assay	Week post immunisation	Group	Animal ID	Value (AU/mL)
ELISA MSD RBD	0	Naive	MF1	34.705
ELISA MSD RBD	2	Naive	MF1	34.443
ELISA MSD RBD	4	Naive	MF1	32.278
ELISA MSD RBD	4.6	Naive	MF1	18.803
ELISA MSD RBD	5.3	Naive	MF1	159.55
ELISA MSD RBD	6.9	Naive	MF1	1406.33
ELISA MSD RBD	0	Naive	MF2	26.677
ELISA MSD RBD	2	Naive	MF2	20.695
ELISA MSD RBD	4	Naive	MF2	22.642
ELISA MSD RBD	4.6	Naive	MF2	13.877
ELISA MSD RBD	5.3	Naive	MF2	58.845
ELISA MSD RBD	6.9	Naive	MF2	1705.54
ELISA MSD RBD	0	Naive	MF3	99.012
ELISA MSD RBD	2	Naive	MF3	92.174
ELISA MSD RBD	4	Naive	MF3	72.606
ELISA MSD RBD	4.6	Naive	MF3	53.264
ELISA MSD RBD	5.3	Naive	MF3	212.104
ELISA MSD RBD	6.9	Naive	MF3	30118.9
ELISA MSD RBD	0	Naive	MF4	27.996
ELISA MSD RBD	2	Naive	MF4	27.139
ELISA MSD RBD	4	Naive	MF4	19.447
ELISA MSD RBD	4.6	Naive	MF4	18.416
ELISA MSD RBD	5.3	Naive	MF4	50.386
ELISA MSD RBD	6.9	Naive	MF4	553.298
ELISA MSD RBD	0	Naive	MF5	43.387
ELISA MSD RBD	2	Naive	MF5	27.568
ELISA MSD RBD	4	Naive	MF5	19.768
ELISA MSD RBD	4.6	Naive	MF5	27.307
ELISA MSD RBD	5.3	Naive	MF5	78.092
ELISA MSD RBD	6.9	Naive	MF5	2085.47
ELISA MSD RBD	0	Naive	MF6	33.063
ELISA MSD RBD	2	Naive	MF6	18.474
ELISA MSD RBD	4	Naive	MF6	22.324
ELISA MSD RBD	4.6	Naive	MF6	13.049
ELISA MSD RBD	5.3	Naive	MF6	436.935
ELISA MSD RBD	6.9	Naive	MF6	3068.24
ELISA MSD RBD	-24.6	Conv.	MF7	43.55
ELISA MSD RBD	-22.7	Conv.	MF7	15749.4
ELISA MSD RBD	-21.9	Conv.	MF7	18730.2
ELISA MSD RBD	-18.9	Conv.	MF7	10164.2
ELISA MSD RBD	0	Conv.	MF7	2389.26
ELISA MSD RBD	2	Conv.	MF7	2750.05
ELISA MSD RBD	4	Conv.	MF7	2849.98
ELISA MSD RBD	4.6	Conv.	MF7	3263.89
ELISA MSD RBD	5.3	Conv.	MF7	78928.6
ELISA MSD RBD	6.9	Conv.	MF7	62710.4
ELISA MSD RBD	-24.6	Conv.	MF8	57.24
ELISA MSD RBD	-22.7	Conv.	MF8	1903.33
ELISA MSD RBD	-21.9	Conv.	MF8	4028.8
ELISA MSD RBD	-18.9	Conv.	MF8	22221.3
ELISA MSD RBD	0	Conv.	MF8	3160.87
ELISA MSD RBD	2	Conv.	MF8	3577.39
ELISA MSD RBD	4	Conv.	MF8	3024.74
ELISA MSD RBD	4.6	Conv.	MF8	4781.77
ELISA MSD RBD	5.3	Conv.	MF8	112855
ELISA MSD RBD	6.9	Conv.	MF8	79858.8
ELISA MSD RBD	-24.6	Conv.	MF9	19.69
ELISA MSD RBD	-22.7	Conv.	MF9	562.97
ELISA MSD RBD	-21.9	Conv.	MF9	759.9
ELISA MSD RBD	-18.9	Conv.	MF9	4018.75
ELISA MSD RBD	0	Conv.	MF9	1625.68
ELISA MSD RBD	2	Conv.	MF9	1671.37
ELISA MSD RBD	4	Conv.	MF9	1437.81
ELISA MSD RBD	4.6	Conv.	MF9	3935.14
ELISA MSD RBD	5.3	Conv.	MF9	119469
ELISA MSD RBD	6.9	Conv.	MF9	103997
ELISA MSD RBD	-24.6	Conv.	MF10	22.64
ELISA MSD RBD	-22.7	Conv.	MF10	272.22
ELISA MSD RBD	-21.9	Conv.	MF10	1084.23
ELISA MSD RBD	-18.9	Conv.	MF10	414.83
ELISA MSD RBD	0	Conv.	MF10	140.824
ELISA MSD RBD	2	Conv.	MF10	97.673
ELISA MSD RBD	4	Conv.	MF10	56.987
ELISA MSD RBD	4.6	Conv.	MF10	173.471
ELISA MSD RBD	5.3	Conv.	MF10	66767.3
ELISA MSD RBD	6.9	Conv.	MF10	53072.9
ELISA MSD RBD	-24.6	Conv.	MF11	13.11
ELISA MSD RBD	-22.7	Conv.	MF11	1596.46
ELISA MSD RBD	-21.9	Conv.	MF11	1792.48
ELISA MSD RBD	-18.9	Conv.	MF11	3047.55
ELISA MSD RBD	0	Conv.	MF11	1857.09
ELISA MSD RBD	2	Conv.	MF11	2506.66
ELISA MSD RBD	4	Conv.	MF11	2902.18
ELISA MSD RBD	4.6	Conv.	MF11	2610.9
ELISA MSD RBD	5.3	Conv.	MF11	82420.1
ELISA MSD RBD	6.9	Conv.	MF11	72320.8
ELISA MSD RBD	-24.6	Conv.	MF12	25.22
ELISA MSD RBD	-22.7	Conv.	MF12	2009.39
ELISA MSD RBD	-21.9	Conv.	MF12	3052.28
ELISA MSD RBD	-18.9	Conv.	MF12	1853.45
ELISA MSD RBD	0	Conv.	MF12	1770.02
ELISA MSD RBD	2	Conv.	MF12	2921.58
ELISA MSD RBD	4	Conv.	MF12	1866.86
ELISA MSD RBD	4.6	Conv.	MF12	2217.17
ELISA MSD RBD	5.3	Conv.	MF12	153726
ELISA MSD RBD	6.9	Conv.	MF12	84298.8
ELISA MSD RBD	-24.6	αCD40.RBD	MF13	17.47
ELISA MSD RBD	-22.7	αCD40.RBD	MF13	10269.5
ELISA MSD RBD	-21.9	αCD40.RBD	MF13	12320.5
ELISA MSD RBD	-18.9	αCD40.RBD	MF13	ND
ELISA MSD RBD	0	αCD40.RBD	MF13	8924.74
ELISA MSD RBD	2	αCD40.RBD	MF13	484467
ELISA MSD RBD	4	αCD40.RBD	MF13	541927
ELISA MSD RBD	4.6	αCD40.RBD	MF13	507754
ELISA MSD RBD	5.3	αCD40.RBD	MF13	589785
ELISA MSD RBD	6.9	αCD40.RBD	MF13	439119
ELISA MSD RBD	-24.6	αCD40.RBD	MF14	21.67
ELISA MSD RBD	-22.7	αCD40.RBD	MF14	371.31
ELISA MSD RBD	-21.9	αCD40.RBD	MF14	972.3
ELISA MSD RBD	-18.9	αCD40.RBD	MF14	3033.94
ELISA MSD RBD	0	αCD40.RBD	MF14	1156.86
ELISA MSD RBD	2	αCD40.RBD	MF14	192206
ELISA MSD RBD	4	αCD40.RBD	MF14	173152
ELISA MSD RBD	4.6	αCD40.RBD	MF14	171155
ELISA MSD RBD	5.3	αCD40.RBD	MF14	108780
ELISA MSD RBD	6.9	αCD40.RBD	MF14	128569
ELISA MSD RBD	-24.6	αCD40.RBD	MF15	40.47
ELISA MSD RBD	-22.7	αCD40.RBD	MF15	3968.93
ELISA MSD RBD	-21.9	αCD40.RBD	MF15	6873.14
ELISA MSD RBD	-18.9	αCD40.RBD	MF15	3226.85
ELISA MSD RBD	0	αCD40.RBD	MF15	3477.76
ELISA MSD RBD	2	αCD40.RBD	MF15	228906
ELISA MSD RBD	4	αCD40.RBD	MF15	99022.2
ELISA MSD RBD	4.6	αCD40.RBD	MF15	88146.9
ELISA MSD RBD	5.3	αCD40.RBD	MF15	54082.3
ELISA MSD RBD	6.9	αCD40.RBD	MF15	76111.3
ELISA MSD RBD	-24.6	αCD40.RBD	MF16	70.59
ELISA MSD RBD	-22.7	αCD40.RBD	MF16	266.26
ELISA MSD RBD	-21.9	αCD40.RBD	MF16	513.93
ELISA MSD RBD	-18.9	αCD40.RBD	MF16	531.47
ELISA MSD RBD	0	αCD40.RBD	MF16	196.68
ELISA MSD RBD	2	αCD40.RBD	MF16	20923.2
ELISA MSD RBD	4	αCD40.RBD	MF16	40180.1
ELISA MSD RBD	4.6	αCD40.RBD	MF16	15014.8
ELISA MSD RBD	5.3	αCD40.RBD	MF16	27543
ELISA MSD RBD	6.9	αCD40.RBD	MF16	19891.9
ELISA MSD RBD	-24.6	αCD40.RBD	MF17	16.32
ELISA MSD RBD	-22.7	αCD40.RBD	MF17	1628.41
ELISA MSD RBD	-21.9	αCD40.RBD	MF17	1698.08
ELISA MSD RBD	-18.9	αCD40.RBD	MF17	1292.58
ELISA MSD RBD	0	αCD40.RBD	MF17	521.041
ELISA MSD RBD	2	αCD40.RBD	MF17	133388
ELISA MSD RBD	4	αCD40.RBD	MF17	133291
ELISA MSD RBD	4.6	αCD40.RBD	MF17	103084
ELISA MSD RBD	5.3	αCD40.RBD	MF17	99427
ELISA MSD RBD	6.9	αCD40.RBD	MF17	94531.1
ELISA MSD RBD	-24.6	αCD40.RBD	MF18	54.65
ELISA MSD RBD	-22.7	αCD40.RBD	MF18	3198.7
ELISA MSD RBD	-21.9	αCD40.RBD	MF18	3357.75
ELISA MSD RBD	-18.9	αCD40.RBD	MF18	4958.46
ELISA MSD RBD	0	αCD40.RBD	MF18	3436.76
ELISA MSD RBD	2	αCD40.RBD	MF18	96682.3
ELISA MSD RBD	4	αCD40.RBD	MF18	73282.8
ELISA MSD RBD	4.6	αCD40.RBD	MF18	55707.6
ELISA MSD RBD	5.3	αCD40.RBD	MF18	80086.9
ELISA MSD RBD	6.9	αCD40.RBD	MF18	48411.4
ELISA MSD N	0	Naive	MF1	890.314
ELISA MSD N	2	Naive	MF1	289.833
ELISA MSD N	4	Naive	MF1	519.384
ELISA MSD N	4.6	Naive	MF1	189.606
ELISA MSD N	5.3	Naive	MF1	653.057
ELISA MSD N	6.9	Naive	MF1	1300.74
ELISA MSD N	0	Naive	MF2	187.819
ELISA MSD N	2	Naive	MF2	125.754
ELISA MSD N	4	Naive	MF2	34.117
ELISA MSD N	4.6	Naive	MF2	73.232
ELISA MSD N	5.3	Naive	MF2	241.266
ELISA MSD N	6.9	Naive	MF2	4657.81
ELISA MSD N	0	Naive	MF3	579.207
ELISA MSD N	2	Naive	MF3	91.113
ELISA MSD N	4	Naive	MF3	204.027
ELISA MSD N	4.6	Naive	MF3	70.038
ELISA MSD N	5.3	Naive	MF3	119.874
ELISA MSD N	6.9	Naive	MF3	1988.64
ELISA MSD N	0	Naive	MF4	970.02
ELISA MSD N	2	Naive	MF4	729.433
ELISA MSD N	4	Naive	MF4	804.007
ELISA MSD N	4.6	Naive	MF4	724.31
ELISA MSD N	5.3	Naive	MF4	948.884
ELISA MSD N	6.9	Naive	MF4	1505.56
ELISA MSD N	0	Naive	MF5	487.831
ELISA MSD N	2	Naive	MF5	65.068
ELISA MSD N	4	Naive	MF5	15.257
ELISA MSD N	4.6	Naive	MF5	96.979
ELISA MSD N	5.3	Naive	MF5	293.99
ELISA MSD N	6.9	Naive	MF5	58.501
ELISA MSD N	0	Naive	MF6	96.901
ELISA MSD N	2	Naive	MF6	151.161
ELISA MSD N	4	Naive	MF6	30.247
ELISA MSD N	4.6	Naive	MF6	118.863
ELISA MSD N	5.3	Naive	MF6	28.506
ELISA MSD N	6.9	Naive	MF6	1049.88
ELISA MSD N	-24.6	Conv.	MF7	44.88
ELISA MSD N	-22.7	Conv.	MF7	30.07
ELISA MSD N	-21.9	Conv.	MF7	103.37
ELISA MSD N	-18.9	Conv.	MF7	218.81
ELISA MSD N	0	Conv.	MF7	485.098
ELISA MSD N	2	Conv.	MF7	118.807
ELISA MSD N	4	Conv.	MF7	109.21
ELISA MSD N	4.6	Conv.	MF7	230.228
ELISA MSD N	5.3	Conv.	MF7	31959.4
ELISA MSD N	6.9	Conv.	MF7	30615.5
ELISA MSD N	-24.6	Conv.	MF8	44.69
ELISA MSD N	-22.7	Conv.	MF8	1612.71
ELISA MSD N	-21.9	Conv.	MF8	2760.42
ELISA MSD N	-18.9	Conv.	MF8	3014.56
ELISA MSD N	0	Conv.	MF8	3687.19
ELISA MSD N	2	Conv.	MF8	3717.04
ELISA MSD N	4	Conv.	MF8	3061.21
ELISA MSD N	4.6	Conv.	MF8	9677.18
ELISA MSD N	5.3	Conv.	MF8	511872
ELISA MSD N	6.9	Conv.	MF8	310877
ELISA MSD N	-24.6	Conv.	MF9	71.38
ELISA MSD N	-22.7	Conv.	MF9	255.63
ELISA MSD N	-21.9	Conv.	MF9	397.75
ELISA MSD N	-18.9	Conv.	MF9	3284.35
ELISA MSD N	0	Conv.	MF9	5531.59
ELISA MSD N	2	Conv.	MF9	5338.76
ELISA MSD N	4	Conv.	MF9	4703.4
ELISA MSD N	4.6	Conv.	MF9	20517.5
ELISA MSD N	5.3	Conv.	MF9	429172
ELISA MSD N	6.9	Conv.	MF9	425992
ELISA MSD N	-24.6	Conv.	MF10	38.03
ELISA MSD N	-22.7	Conv.	MF10	44.31
ELISA MSD N	-21.9	Conv.	MF10	984.28
ELISA MSD N	-18.9	Conv.	MF10	124.38
ELISA MSD N	0	Conv.	MF10	322.218
ELISA MSD N	2	Conv.	MF10	191.204
ELISA MSD N	4	Conv.	MF10	14.679
ELISA MSD N	4.6	Conv.	MF10	299.728
ELISA MSD N	5.3	Conv.	MF10	17082.8
ELISA MSD N	6.9	Conv.	MF10	26217.3
ELISA MSD N	-24.6	Conv.	MF11	11.39
ELISA MSD N	-22.7	Conv.	MF11	198.06
ELISA MSD N	-21.9	Conv.	MF11	861.53
ELISA MSD N	-18.9	Conv.	MF11	1948.31
ELISA MSD N	0	Conv.	MF11	1384.32
ELISA MSD N	2	Conv.	MF11	1662.8
ELISA MSD N	4	Conv.	MF11	1717
ELISA MSD N	4.6	Conv.	MF11	7101.85
ELISA MSD N	5.3	Conv.	MF11	485859
ELISA MSD N	6.9	Conv.	MF11	264566
ELISA MSD N	-24.6	Conv.	MF12	40.36
ELISA MSD N	-22.7	Conv.	MF12	201.25
ELISA MSD N	-21.9	Conv.	MF12	101.74
ELISA MSD N	-18.9	Conv.	MF12	175.87
ELISA MSD N	0	Conv.	MF12	292.87
ELISA MSD N	2	Conv.	MF12	266.11
ELISA MSD N	4	Conv.	MF12	89.15
ELISA MSD N	4.6	Conv.	MF12	141.065
ELISA MSD N	5.3	Conv.	MF12	68755.2
ELISA MSD N	6.9	Conv.	MF12	51825.9
ELISA MSD N	-24.6	αCD40.RBD	MF13	30.57
ELISA MSD N	-22.7	αCD40.RBD	MF13	2533.64
ELISA MSD N	-21.9	αCD40.RBD	MF13	4257.2
ELISA MSD N	-18.9	αCD40.RBD	MF13	36125.5
ELISA MSD N	0	αCD40.RBD	MF13	6315.26
ELISA MSD N	2	αCD40.RBD	MF13	7324.52
ELISA MSD N	4	αCD40.RBD	MF13	7425.72
ELISA MSD N	4.6	αCD40.RBD	MF13	16361.2
ELISA MSD N	5.3	αCD40.RBD	MF13	570557
ELISA MSD N	6.9	αCD40.RBD	MF13	566590
ELISA MSD N	-24.6	αCD40.RBD	MF14	40.36
ELISA MSD N	-22.7	αCD40.RBD	MF14	377.33
ELISA MSD N	-21.9	αCD40.RBD	MF14	59.47
ELISA MSD N	-18.9	αCD40.RBD	MF14	1395.32
ELISA MSD N	0	αCD40.RBD	MF14	455.977
ELISA MSD N	2	αCD40.RBD	MF14	912.971
ELISA MSD N	4	αCD40.RBD	MF14	1268
ELISA MSD N	4.6	αCD40.RBD	MF14	4231.78
ELISA MSD N	5.3	αCD40.RBD	MF14	101342
ELISA MSD N	6.9	αCD40.RBD	MF14	76600.9
ELISA MSD N	-24.6	αCD40.RBD	MF15	65.83
ELISA MSD N	-22.7	αCD40.RBD	MF15	4144.55
ELISA MSD N	-21.9	αCD40.RBD	MF15	5949.02
ELISA MSD N	-18.9	αCD40.RBD	MF15	3069.85
ELISA MSD N	0	αCD40.RBD	MF15	2112.03
ELISA MSD N	2	αCD40.RBD	MF15	3274.27
ELISA MSD N	4	αCD40.RBD	MF15	2139.01
ELISA MSD N	4.6	αCD40.RBD	MF15	34032.2
ELISA MSD N	5.3	αCD40.RBD	MF15	237182
ELISA MSD N	6.9	αCD40.RBD	MF15	228745
ELISA MSD N	-24.6	αCD40.RBD	MF16	288.72
ELISA MSD N	-22.7	αCD40.RBD	MF16	825.94
ELISA MSD N	-21.9	αCD40.RBD	MF16	1162.71
ELISA MSD N	-18.9	αCD40.RBD	MF16	824.8
ELISA MSD N	0	αCD40.RBD	MF16	504.867
ELISA MSD N	2	αCD40.RBD	MF16	392.387
ELISA MSD N	4	αCD40.RBD	MF16	1756.2
ELISA MSD N	4.6	αCD40.RBD	MF16	986.817
ELISA MSD N	5.3	αCD40.RBD	MF16	80239.8
ELISA MSD N	6.9	αCD40.RBD	MF16	40463.5
ELISA MSD N	-24.6	αCD40.RBD	MF17	37.44
ELISA MSD N	-22.7	αCD40.RBD	MF17	112.27
ELISA MSD N	-21.9	αCD40.RBD	MF17	290.58
ELISA MSD N	-18.9	αCD40.RBD	MF17	159.94
ELISA MSD N	0	αCD40.RBD	MF17	194.239
ELISA MSD N	2	αCD40.RBD	MF17	192.722
ELISA MSD N	4	αCD40.RBD	MF17	428.837
ELISA MSD N	4.6	αCD40.RBD	MF17	424.413
ELISA MSD N	5.3	αCD40.RBD	MF17	6836.85
ELISA MSD N	6.9	αCD40.RBD	MF17	8091.82
ELISA MSD N	-24.6	αCD40.RBD	MF18	225.8
ELISA MSD N	-22.7	αCD40.RBD	MF18	1349.57
ELISA MSD N	-21.9	αCD40.RBD	MF18	3371.51
ELISA MSD N	-18.9	αCD40.RBD	MF18	5527
ELISA MSD N	0	αCD40.RBD	MF18	4201.9
ELISA MSD N	2	αCD40.RBD	MF18	4323.49
ELISA MSD N	4	αCD40.RBD	MF18	4876.55
ELISA MSD N	4.6	αCD40.RBD	MF18	9180.65
ELISA MSD N	5.3	αCD40.RBD	MF18	152057
ELISA MSD N	6.9	αCD40.RBD	MF18	75436.5
