# Supplementary material for: Modelling the response to vaccine in non-human primates to define SARS-CoV-2 mechanistic correlates of protection
Source: eLife. 2022 Jul 8;11:e75427. doi: 10.7554/eLife.75427 (PMC9282856; doi:10.7554/eLife.75427)
Supplement: Figure 1—source data 6. [file elife-75427-fig1-data6.xlsx]

## Sheet: Feuil1
Figure 1 - figure supplement 2
Study [Marlin, 2021]
Fluid	Day post exposure	Group	Animal ID	sgViral load (copies/mL)				ND	Not Determined
Nasal fluid	1	Naive	MF1	<LOD				<LOD	Under the limit of detection
Nasal fluid	1	Naive	MF2	<LOD				LOD	476 cp/ml
Nasal fluid	1	Naive	MF3	1765
Nasal fluid	1	Naive	MF4	<LOD
Nasal fluid	1	Naive	MF5	<LOD
Nasal fluid	1	Naive	MF6	9301
Nasal fluid	1	Conv.	MF7	<LOD
Nasal fluid	1	Conv.	MF8	<LOD
Nasal fluid	1	Conv.	MF9	<LOD
Nasal fluid	1	Conv.	MF10	<LOD
Nasal fluid	1	Conv.	MF11	<LOD
Nasal fluid	1	Conv.	MF12	<LOD
Nasal fluid	1	αCD40.RBD	MF13	<LOD
Nasal fluid	1	αCD40.RBD	MF14	<LOD
Nasal fluid	1	αCD40.RBD	MF15	<LOD
Nasal fluid	1	αCD40.RBD	MF16	<LOD
Nasal fluid	1	αCD40.RBD	MF17	<LOD
Nasal fluid	1	αCD40.RBD	MF18	<LOD
Tracheal Fluid	1	Naive	MF1	86402
Tracheal Fluid	1	Naive	MF2	<LOD
Tracheal Fluid	1	Naive	MF3	<LOD
Tracheal Fluid	1	Naive	MF4	164835
Tracheal Fluid	1	Naive	MF5	<LOD
Tracheal Fluid	1	Naive	MF6	530934
Tracheal Fluid	1	Conv.	MF7	<LOD
Tracheal Fluid	1	Conv.	MF8	<LOD
Tracheal Fluid	1	Conv.	MF9	16277
Tracheal Fluid	1	Conv.	MF10	16033
Tracheal Fluid	1	Conv.	MF11	<LOD
Tracheal Fluid	1	Conv.	MF12	<LOD
Tracheal Fluid	1	αCD40.RBD	MF13	<LOD
Tracheal Fluid	1	αCD40.RBD	MF14	<LOD
Tracheal Fluid	1	αCD40.RBD	MF15	<LOD
Tracheal Fluid	1	αCD40.RBD	MF16	<LOD
Tracheal Fluid	1	αCD40.RBD	MF17	<LOD
Tracheal Fluid	1	αCD40.RBD	MF18	<LOD
Nasal fluid	2	Naive	MF1	293405
Nasal fluid	2	Naive	MF2	<LOD
Nasal fluid	2	Naive	MF3	539907
Nasal fluid	2	Naive	MF4	3760
Nasal fluid	2	Naive	MF5	172166
Nasal fluid	2	Naive	MF6	30423
Nasal fluid	2	Conv.	MF7	<LOD
Nasal fluid	2	Conv.	MF8	<LOD
Nasal fluid	2	Conv.	MF9	ND
Nasal fluid	2	Conv.	MF10	<LOD
Nasal fluid	2	Conv.	MF11	904
Nasal fluid	2	Conv.	MF12	2786
Nasal fluid	2	αCD40.RBD	MF13	<LOD
Nasal fluid	2	αCD40.RBD	MF14	<LOD
Nasal fluid	2	αCD40.RBD	MF15	<LOD
Nasal fluid	2	αCD40.RBD	MF16	<LOD
Nasal fluid	2	αCD40.RBD	MF17	<LOD
Nasal fluid	2	αCD40.RBD	MF18	<LOD
Tracheal Fluid	2	Naive	MF1	225427
Tracheal Fluid	2	Naive	MF2	328098
Tracheal Fluid	2	Naive	MF3	194350
Tracheal Fluid	2	Naive	MF4	37700
Tracheal Fluid	2	Naive	MF5	24518
Tracheal Fluid	2	Naive	MF6	3200765
Tracheal Fluid	2	Conv.	MF7	2103
Tracheal Fluid	2	Conv.	MF8	<LOD
Tracheal Fluid	2	Conv.	MF9	13429
Tracheal Fluid	2	Conv.	MF10	2259
Tracheal Fluid	2	Conv.	MF11	2782
Tracheal Fluid	2	Conv.	MF12	<LOD
Tracheal Fluid	2	αCD40.RBD	MF13	<LOD
Tracheal Fluid	2	αCD40.RBD	MF14	<LOD
Tracheal Fluid	2	αCD40.RBD	MF15	<LOD
Tracheal Fluid	2	αCD40.RBD	MF16	1776
Tracheal Fluid	2	αCD40.RBD	MF17	<LOD
Tracheal Fluid	2	αCD40.RBD	MF18	<LOD
Nasal fluid	3	Naive	MF1	5182
Nasal fluid	3	Naive	MF2	ND
Nasal fluid	3	Naive	MF3	932945
Nasal fluid	3	Naive	MF4	ND
Nasal fluid	3	Naive	MF5	1
Nasal fluid	3	Naive	MF6	130520
Nasal fluid	3	Conv.	MF7	<LOD
Nasal fluid	3	Conv.	MF8	<LOD
Nasal fluid	3	Conv.	MF9	<LOD
Nasal fluid	3	Conv.	MF10	ND
Nasal fluid	3	Conv.	MF11	1706
Nasal fluid	3	Conv.	MF12	ND
Nasal fluid	3	αCD40.RBD	MF13	<LOD
Nasal fluid	3	αCD40.RBD	MF14	<LOD
Nasal fluid	3	αCD40.RBD	MF15	<LOD
Nasal fluid	3	αCD40.RBD	MF16	<LOD
Nasal fluid	3	αCD40.RBD	MF17	<LOD
Nasal fluid	3	αCD40.RBD	MF18	<LOD
Tracheal Fluid	3	Naive	MF1	<LOD
Tracheal Fluid	3	Naive	MF2	19298
Tracheal Fluid	3	Naive	MF3	11234
Tracheal Fluid	3	Naive	MF4	<LOD
Tracheal Fluid	3	Naive	MF5	<LOD
Tracheal Fluid	3	Naive	MF6	113088
Tracheal Fluid	3	Conv.	MF7	<LOD
Tracheal Fluid	3	Conv.	MF8	<LOD
Tracheal Fluid	3	Conv.	MF9	<LOD
Tracheal Fluid	3	Conv.	MF10	<LOD
Tracheal Fluid	3	Conv.	MF11	<LOD
Tracheal Fluid	3	Conv.	MF12	<LOD
Tracheal Fluid	3	αCD40.RBD	MF13	<LOD
Tracheal Fluid	3	αCD40.RBD	MF14	<LOD
Tracheal Fluid	3	αCD40.RBD	MF15	<LOD
Tracheal Fluid	3	αCD40.RBD	MF16	<LOD
Tracheal Fluid	3	αCD40.RBD	MF17	<LOD
Tracheal Fluid	3	αCD40.RBD	MF18	<LOD
Nasal fluid	4	Naive	MF1	7330
Nasal fluid	4	Naive	MF2	2864
Nasal fluid	4	Naive	MF3	2775
Nasal fluid	4	Naive	MF4	<LOD
Nasal fluid	4	Naive	MF5	<LOD
Nasal fluid	4	Naive	MF6	999
Nasal fluid	4	Conv.	MF7	<LOD
Nasal fluid	4	Conv.	MF8	<LOD
Nasal fluid	4	Conv.	MF9	<LOD
Nasal fluid	4	Conv.	MF10	<LOD
Nasal fluid	4	Conv.	MF11	<LOD
Nasal fluid	4	Conv.	MF12	<LOD
Nasal fluid	4	αCD40.RBD	MF13	<LOD
Nasal fluid	4	αCD40.RBD	MF14	<LOD
Nasal fluid	4	αCD40.RBD	MF15	<LOD
Nasal fluid	4	αCD40.RBD	MF16	<LOD
Nasal fluid	4	αCD40.RBD	MF17	<LOD
Nasal fluid	4	αCD40.RBD	MF18	<LOD
Tracheal Fluid	4	Naive	MF1	<LOD
Tracheal Fluid	4	Naive	MF2	904
Tracheal Fluid	4	Naive	MF3	<LOD
Tracheal Fluid	4	Naive	MF4	<LOD
Tracheal Fluid	4	Naive	MF5	8540
Tracheal Fluid	4	Naive	MF6	<LOD
Tracheal Fluid	4	Conv.	MF7	<LOD
Tracheal Fluid	4	Conv.	MF8	<LOD
Tracheal Fluid	4	Conv.	MF9	<LOD
Tracheal Fluid	4	Conv.	MF10	<LOD
Tracheal Fluid	4	Conv.	MF11	<LOD
Tracheal Fluid	4	Conv.	MF12	<LOD
Tracheal Fluid	4	αCD40.RBD	MF13	<LOD
Tracheal Fluid	4	αCD40.RBD	MF14	<LOD
Tracheal Fluid	4	αCD40.RBD	MF15	<LOD
Tracheal Fluid	4	αCD40.RBD	MF16	<LOD
Tracheal Fluid	4	αCD40.RBD	MF17	<LOD
Tracheal Fluid	4	αCD40.RBD	MF18	<LOD
Nasal fluid	6	Naive	MF1	<LOD
Nasal fluid	6	Naive	MF3	<LOD
Nasal fluid	6	Naive	MF4	<LOD
Nasal fluid	6	Naive	MF5	<LOD
Nasal fluid	6	Naive	MF6	<LOD
Nasal fluid	6	Conv.	MF7	<LOD
Nasal fluid	6	Conv.	MF8	<LOD
Nasal fluid	6	Conv.	MF9	<LOD
Nasal fluid	6	Conv.	MF10	<LOD
Nasal fluid	6	Conv.	MF11	<LOD
Nasal fluid	6	Conv.	MF12	<LOD
Nasal fluid	6	αCD40.RBD	MF13	<LOD
Nasal fluid	6	αCD40.RBD	MF14	<LOD
Nasal fluid	6	αCD40.RBD	MF15	<LOD
Nasal fluid	6	αCD40.RBD	MF16	<LOD
Nasal fluid	6	αCD40.RBD	MF17	<LOD
Nasal fluid	6	αCD40.RBD	MF18	<LOD
Tracheal Fluid	6	Naive	MF1	<LOD
Tracheal Fluid	6	Naive	MF2	10769
Tracheal Fluid	6	Naive	MF3	<LOD
Tracheal Fluid	6	Naive	MF4	<LOD
Tracheal Fluid	6	Naive	MF5	<LOD
Tracheal Fluid	6	Naive	MF6	<LOD
Tracheal Fluid	6	Conv.	MF7	<LOD
Tracheal Fluid	6	Conv.	MF8	<LOD
Tracheal Fluid	6	Conv.	MF9	<LOD
Tracheal Fluid	6	Conv.	MF10	<LOD
Tracheal Fluid	6	Conv.	MF11	<LOD
Tracheal Fluid	6	Conv.	MF12	<LOD
Tracheal Fluid	6	αCD40.RBD	MF13	<LOD
Tracheal Fluid	6	αCD40.RBD	MF14	<LOD
Tracheal Fluid	6	αCD40.RBD	MF15	<LOD
Tracheal Fluid	6	αCD40.RBD	MF16	<LOD
Tracheal Fluid	6	αCD40.RBD	MF17	<LOD
Tracheal Fluid	6	αCD40.RBD	MF18	<LOD
