# Supplementary material for: Modelling the response to vaccine in non-human primates to define SARS-CoV-2 mechanistic correlates of protection
Source: eLife. 2022 Jul 8;11:e75427. doi: 10.7554/eLife.75427 (PMC9282856; doi:10.7554/eLife.75427)
Supplement: Figure 1—source data 7. [file elife-75427-fig1-data7.xlsx]

## Sheet: Feuil1
Figure 1 - figure supplement 4A
Study [Marlin, 2021]
Assay	Day post exposure	Stimulation	Group	Animal ID	Value (% of CD4 T cells)
ICS IL2	-35	NS	Conv.	MF7	0.0218
ICS IL2	-35	NS	Conv.	MF8	0.0105
ICS IL2	-35	NS	Conv.	MF9	0.0082
ICS IL2	-35	NS	αCD40.RBD	MF13	0.0128
ICS IL2	-35	NS	Conv.	MF10	0.0082
ICS IL2	-35	NS	αCD40.RBD	MF14	0.0044
ICS IL2	-35	NS	αCD40.RBD	MF15	0.0033
ICS IL2	-35	NS	αCD40.RBD	MF16	0.0208
ICS IL2	-35	NS	Conv.	MF11	0.0472
ICS IL2	-35	NS	αCD40.RBD	MF17	0.0176
ICS IL2	-35	NS	Conv.	MF12	0.008
ICS IL2	-35	NS	αCD40.RBD	MF18	0.0082
ICS IL2	-35	NS	Naive	MF1	0.0052
ICS IL2	-35	NS	Naive	MF2	0.0182
ICS IL2	-35	NS	Naive	MF3	0.0097
ICS IL2	-35	NS	Naive	MF4	0.0085
ICS IL2	-35	NS	Naive	MF5	0.0075
ICS IL2	-35	NS	Naive	MF6	0.0038
ICS IL2	-35	PepMix SARS-CoV-2 (S-RBD) 70	Conv.	MF7	0.0544
ICS IL2	-35	PepMix SARS-CoV-2 (S-RBD) 70	Conv.	MF8	0.0407
ICS IL2	-35	PepMix SARS-CoV-2 (S-RBD) 70	Conv.	MF9	0.0043
ICS IL2	-35	PepMix SARS-CoV-2 (S-RBD) 70	αCD40.RBD	MF13	0.0175
ICS IL2	-35	PepMix SARS-CoV-2 (S-RBD) 70	Conv.	MF10	0.0136
ICS IL2	-35	PepMix SARS-CoV-2 (S-RBD) 70	αCD40.RBD	MF14	0.0128
ICS IL2	-35	PepMix SARS-CoV-2 (S-RBD) 70	αCD40.RBD	MF15	0.0061
ICS IL2	-35	PepMix SARS-CoV-2 (S-RBD) 70	αCD40.RBD	MF16	0.0125
ICS IL2	-35	PepMix SARS-CoV-2 (S-RBD) 70	Conv.	MF11	0.0617
ICS IL2	-35	PepMix SARS-CoV-2 (S-RBD) 70	αCD40.RBD	MF17	0.0196
ICS IL2	-35	PepMix SARS-CoV-2 (S-RBD) 70	Conv.	MF12	0.001
ICS IL2	-35	PepMix SARS-CoV-2 (S-RBD) 70	αCD40.RBD	MF18	0.0044
ICS IL2	-35	PepMix SARS-CoV-2 (S-RBD) 70	Naive	MF1	0.0041
ICS IL2	-35	PepMix SARS-CoV-2 (S-RBD) 70	Naive	MF2	0.0124
ICS IL2	-35	PepMix SARS-CoV-2 (S-RBD) 70	Naive	MF3	0.0137
ICS IL2	-35	PepMix SARS-CoV-2 (S-RBD) 70	Naive	MF4	0.006
ICS IL2	-35	PepMix SARS-CoV-2 (S-RBD) 70	Naive	MF5	0.0146
ICS IL2	-35	PepMix SARS-CoV-2 (S-RBD) 70	Naive	MF6	0.0049
ICS IL2	-14	NS	Conv.	MF7	0.0285
ICS IL2	-14	NS	Conv.	MF8	0.0033
ICS IL2	-14	NS	Conv.	MF9	0.0104
ICS IL2	-14	NS	αCD40.RBD	MF13	0.0019
ICS IL2	-14	NS	Conv.	MF10	0.0021
ICS IL2	-14	NS	αCD40.RBD	MF14	0.0138
ICS IL2	-14	NS	αCD40.RBD	MF15	0.0011
ICS IL2	-14	NS	αCD40.RBD	MF16	0.0039
ICS IL2	-14	NS	Conv.	MF11	0.0039
ICS IL2	-14	NS	αCD40.RBD	MF17	0.0325
ICS IL2	-14	NS	Conv.	MF12	0.003
ICS IL2	-14	NS	αCD40.RBD	MF18	0.0185
ICS IL2	-14	NS	Naive	MF1	0.007
ICS IL2	-14	NS	Naive	MF2	0.0277
ICS IL2	-14	NS	Naive	MF3	0.0047
ICS IL2	-14	NS	Naive	MF4	ND
ICS IL2	-14	NS	Naive	MF5	0.0111
ICS IL2	-14	NS	Naive	MF6	0.0036
ICS IL2	-14	PepMix SARS-CoV-2 (S-RBD) 70	Conv.	MF7	0.0225
ICS IL2	-14	PepMix SARS-CoV-2 (S-RBD) 70	Conv.	MF8	0.0275
ICS IL2	-14	PepMix SARS-CoV-2 (S-RBD) 70	Conv.	MF9	0.0097
ICS IL2	-14	PepMix SARS-CoV-2 (S-RBD) 70	αCD40.RBD	MF13	0.0498
ICS IL2	-14	PepMix SARS-CoV-2 (S-RBD) 70	Conv.	MF10	0.0133
ICS IL2	-14	PepMix SARS-CoV-2 (S-RBD) 70	αCD40.RBD	MF14	0.0547
ICS IL2	-14	PepMix SARS-CoV-2 (S-RBD) 70	αCD40.RBD	MF15	0.0624
ICS IL2	-14	PepMix SARS-CoV-2 (S-RBD) 70	αCD40.RBD	MF16	0.0315
ICS IL2	-14	PepMix SARS-CoV-2 (S-RBD) 70	Conv.	MF11	0.027
ICS IL2	-14	PepMix SARS-CoV-2 (S-RBD) 70	αCD40.RBD	MF17	0.0844
ICS IL2	-14	PepMix SARS-CoV-2 (S-RBD) 70	Conv.	MF12	0.0038
ICS IL2	-14	PepMix SARS-CoV-2 (S-RBD) 70	αCD40.RBD	MF18	0.1025
ICS IL2	-14	PepMix SARS-CoV-2 (S-RBD) 70	Naive	MF1	0.0037
ICS IL2	-14	PepMix SARS-CoV-2 (S-RBD) 70	Naive	MF2	0.0285
ICS IL2	-14	PepMix SARS-CoV-2 (S-RBD) 70	Naive	MF3	0.0061
ICS IL2	-14	PepMix SARS-CoV-2 (S-RBD) 70	Naive	MF4	ND
ICS IL2	-14	PepMix SARS-CoV-2 (S-RBD) 70	Naive	MF5	0.005
ICS IL2	-14	PepMix SARS-CoV-2 (S-RBD) 70	Naive	MF6	0.0112
ICS IL2	9	NS	Conv.	MF7	0.0962
ICS IL2	9	NS	Conv.	MF8	0.0373
ICS IL2	9	NS	Conv.	MF9	0.0559
ICS IL2	9	NS	αCD40.RBD	MF13	0.019
ICS IL2	9	NS	Conv.	MF10	0.0199
ICS IL2	9	NS	αCD40.RBD	MF14	0.0877
ICS IL2	9	NS	αCD40.RBD	MF15	0.0232
ICS IL2	9	NS	αCD40.RBD	MF16	0.1244
ICS IL2	9	NS	Conv.	MF11	0.0199
ICS IL2	9	NS	αCD40.RBD	MF17	0.0832
ICS IL2	9	NS	Conv.	MF12	0.0429
ICS IL2	9	NS	αCD40.RBD	MF18	0.0116
ICS IL2	9	NS	Naive	MF1	0.0182
ICS IL2	9	NS	Naive	MF2	0.0334
ICS IL2	9	NS	Naive	MF3	0.0426
ICS IL2	9	NS	Naive	MF4	0.0174
ICS IL2	9	NS	Naive	MF5	0.0456
ICS IL2	9	NS	Naive	MF6	0.0031
ICS IL2	9	PepMix SARS-CoV-2 (S-RBD) 70	Conv.	MF7	0.1253
ICS IL2	9	PepMix SARS-CoV-2 (S-RBD) 70	Conv.	MF8	0.0489
ICS IL2	9	PepMix SARS-CoV-2 (S-RBD) 70	Conv.	MF9	0.0661
ICS IL2	9	PepMix SARS-CoV-2 (S-RBD) 70	αCD40.RBD	MF13	0.0438
ICS IL2	9	PepMix SARS-CoV-2 (S-RBD) 70	Conv.	MF10	0.0338
ICS IL2	9	PepMix SARS-CoV-2 (S-RBD) 70	αCD40.RBD	MF14	0.0832
ICS IL2	9	PepMix SARS-CoV-2 (S-RBD) 70	αCD40.RBD	MF15	0.0276
ICS IL2	9	PepMix SARS-CoV-2 (S-RBD) 70	αCD40.RBD	MF16	0.1433
ICS IL2	9	PepMix SARS-CoV-2 (S-RBD) 70	Conv.	MF11	0.0543
ICS IL2	9	PepMix SARS-CoV-2 (S-RBD) 70	αCD40.RBD	MF17	0.088
ICS IL2	9	PepMix SARS-CoV-2 (S-RBD) 70	Conv.	MF12	0.0593
ICS IL2	9	PepMix SARS-CoV-2 (S-RBD) 70	αCD40.RBD	MF18	0.0302
ICS IL2	9	PepMix SARS-CoV-2 (S-RBD) 70	Naive	MF1	0.1377
ICS IL2	9	PepMix SARS-CoV-2 (S-RBD) 70	Naive	MF2	0.3013
ICS IL2	9	PepMix SARS-CoV-2 (S-RBD) 70	Naive	MF3	0.0511
ICS IL2	9	PepMix SARS-CoV-2 (S-RBD) 70	Naive	MF4	0.0677
ICS IL2	9	PepMix SARS-CoV-2 (S-RBD) 70	Naive	MF5	0.1235
ICS IL2	9	PepMix SARS-CoV-2 (S-RBD) 70	Naive	MF6	0.0254
ICS IL2	20	NS	Conv.	MF7	0.0889
ICS IL2	20	NS	Conv.	MF8	0.0464
ICS IL2	20	NS	Conv.	MF9	0.0104
ICS IL2	20	NS	αCD40.RBD	MF13	0.0265
ICS IL2	20	NS	Conv.	MF10	0.0248
ICS IL2	20	NS	αCD40.RBD	MF14	0.0692
ICS IL2	20	NS	αCD40.RBD	MF15	0.018
ICS IL2	20	NS	αCD40.RBD	MF16	0.0363
ICS IL2	20	NS	Conv.	MF11	0.0769
ICS IL2	20	NS	αCD40.RBD	MF17	0.0197
ICS IL2	20	NS	Conv.	MF12	0.0206
ICS IL2	20	NS	αCD40.RBD	MF18	0.0069
ICS IL2	20	NS	Naive	MF1	0.0067
ICS IL2	20	NS	Naive	MF2	0.0604
ICS IL2	20	NS	Naive	MF3	0.0584
ICS IL2	20	NS	Naive	MF4	0.0287
ICS IL2	20	NS	Naive	MF5	0.0559
ICS IL2	20	NS	Naive	MF6	0.0086
ICS IL2	20	PepMix SARS-CoV-2 (S-RBD) 70	Conv.	MF7	0.1266
ICS IL2	20	PepMix SARS-CoV-2 (S-RBD) 70	Conv.	MF8	0.0802
ICS IL2	20	PepMix SARS-CoV-2 (S-RBD) 70	Conv.	MF9	0.0175
ICS IL2	20	PepMix SARS-CoV-2 (S-RBD) 70	αCD40.RBD	MF13	0.0717
ICS IL2	20	PepMix SARS-CoV-2 (S-RBD) 70	Conv.	MF10	0.1166
ICS IL2	20	PepMix SARS-CoV-2 (S-RBD) 70	αCD40.RBD	MF14	0.0843
ICS IL2	20	PepMix SARS-CoV-2 (S-RBD) 70	αCD40.RBD	MF15	0.0185
ICS IL2	20	PepMix SARS-CoV-2 (S-RBD) 70	αCD40.RBD	MF16	0.0736
ICS IL2	20	PepMix SARS-CoV-2 (S-RBD) 70	Conv.	MF11	0.0616
ICS IL2	20	PepMix SARS-CoV-2 (S-RBD) 70	αCD40.RBD	MF17	0.0316
ICS IL2	20	PepMix SARS-CoV-2 (S-RBD) 70	Conv.	MF12	0.0113
ICS IL2	20	PepMix SARS-CoV-2 (S-RBD) 70	αCD40.RBD	MF18	0.032
ICS IL2	20	PepMix SARS-CoV-2 (S-RBD) 70	Naive	MF1	0.0358
ICS IL2	20	PepMix SARS-CoV-2 (S-RBD) 70	Naive	MF2	0.1706
ICS IL2	20	PepMix SARS-CoV-2 (S-RBD) 70	Naive	MF3	0.1221
ICS IL2	20	PepMix SARS-CoV-2 (S-RBD) 70	Naive	MF4	0.0582
ICS IL2	20	PepMix SARS-CoV-2 (S-RBD) 70	Naive	MF5	0.0976
ICS IL2	20	PepMix SARS-CoV-2 (S-RBD) 70	Naive	MF6	0.0223
ICS IL2	-35	PepMix SARS-CoV-2 (N) 102	Conv.	MF7	0.0363
ICS IL2	-35	PepMix SARS-CoV-2 (N) 102	Conv.	MF8	0.0779
ICS IL2	-35	PepMix SARS-CoV-2 (N) 102	Conv.	MF9	0.031
ICS IL2	-35	PepMix SARS-CoV-2 (N) 102	αCD40.RBD	MF13	0.0317
ICS IL2	-35	PepMix SARS-CoV-2 (N) 102	Conv.	MF10	0.0125
ICS IL2	-35	PepMix SARS-CoV-2 (N) 102	αCD40.RBD	MF14	0.0355
ICS IL2	-35	PepMix SARS-CoV-2 (N) 102	αCD40.RBD	MF15	0.0141
ICS IL2	-35	PepMix SARS-CoV-2 (N) 102	αCD40.RBD	MF16	0.0107
ICS IL2	-35	PepMix SARS-CoV-2 (N) 102	Conv.	MF11	0.0618
ICS IL2	-35	PepMix SARS-CoV-2 (N) 102	αCD40.RBD	MF17	0.0191
ICS IL2	-35	PepMix SARS-CoV-2 (N) 102	Conv.	MF12	0.002
ICS IL2	-35	PepMix SARS-CoV-2 (N) 102	αCD40.RBD	MF18	0.0231
ICS IL2	-35	PepMix SARS-CoV-2 (N) 102	Naive	MF1	0.0014
ICS IL2	-35	PepMix SARS-CoV-2 (N) 102	Naive	MF2	0.0151
ICS IL2	-35	PepMix SARS-CoV-2 (N) 102	Naive	MF3	0.0074
ICS IL2	-35	PepMix SARS-CoV-2 (N) 102	Naive	MF4	0.007
ICS IL2	-35	PepMix SARS-CoV-2 (N) 102	Naive	MF5	0.0092
ICS IL2	-35	PepMix SARS-CoV-2 (N) 102	Naive	MF6	0.0043
ICS IL2	-14	PepMix SARS-CoV-2 (N) 102	Conv.	MF7	ND
ICS IL2	-14	PepMix SARS-CoV-2 (N) 102	Conv.	MF8	0.0662
ICS IL2	-14	PepMix SARS-CoV-2 (N) 102	Conv.	MF9	0.0235
ICS IL2	-14	PepMix SARS-CoV-2 (N) 102	αCD40.RBD	MF13	0.0198
ICS IL2	-14	PepMix SARS-CoV-2 (N) 102	Conv.	MF10	0.0055
ICS IL2	-14	PepMix SARS-CoV-2 (N) 102	αCD40.RBD	MF14	0.0416
ICS IL2	-14	PepMix SARS-CoV-2 (N) 102	αCD40.RBD	MF15	0.0181
ICS IL2	-14	PepMix SARS-CoV-2 (N) 102	αCD40.RBD	MF16	ND
ICS IL2	-14	PepMix SARS-CoV-2 (N) 102	Conv.	MF11	0.0525
ICS IL2	-14	PepMix SARS-CoV-2 (N) 102	αCD40.RBD	MF17	0.0559
ICS IL2	-14	PepMix SARS-CoV-2 (N) 102	Conv.	MF12	0.0078
ICS IL2	-14	PepMix SARS-CoV-2 (N) 102	αCD40.RBD	MF18	0.0284
ICS IL2	-14	PepMix SARS-CoV-2 (N) 102	Naive	MF1	0.0036
ICS IL2	-14	PepMix SARS-CoV-2 (N) 102	Naive	MF2	0.0301
ICS IL2	-14	PepMix SARS-CoV-2 (N) 102	Naive	MF3	0.0023
ICS IL2	-14	PepMix SARS-CoV-2 (N) 102	Naive	MF4	ND
ICS IL2	-14	PepMix SARS-CoV-2 (N) 102	Naive	MF5	0.005
ICS IL2	-14	PepMix SARS-CoV-2 (N) 102	Naive	MF6	0.0022
ICS IL2	9	PepMix SARS-CoV-2 (N) 102	Conv.	MF7	0.3073
ICS IL2	9	PepMix SARS-CoV-2 (N) 102	Conv.	MF8	0.2545
ICS IL2	9	PepMix SARS-CoV-2 (N) 102	Conv.	MF9	0.465
ICS IL2	9	PepMix SARS-CoV-2 (N) 102	αCD40.RBD	MF13	0.1515
ICS IL2	9	PepMix SARS-CoV-2 (N) 102	Conv.	MF10	0.2719
ICS IL2	9	PepMix SARS-CoV-2 (N) 102	αCD40.RBD	MF14	0.6781
ICS IL2	9	PepMix SARS-CoV-2 (N) 102	αCD40.RBD	MF15	0.1353
ICS IL2	9	PepMix SARS-CoV-2 (N) 102	αCD40.RBD	MF16	0.4408
ICS IL2	9	PepMix SARS-CoV-2 (N) 102	Conv.	MF11	0.3009
ICS IL2	9	PepMix SARS-CoV-2 (N) 102	αCD40.RBD	MF17	0.2868
ICS IL2	9	PepMix SARS-CoV-2 (N) 102	Conv.	MF12	0.2067
ICS IL2	9	PepMix SARS-CoV-2 (N) 102	αCD40.RBD	MF18	0.0657
ICS IL2	9	PepMix SARS-CoV-2 (N) 102	Naive	MF1	0.2195
ICS IL2	9	PepMix SARS-CoV-2 (N) 102	Naive	MF2	0.3091
ICS IL2	9	PepMix SARS-CoV-2 (N) 102	Naive	MF3	0.1527
ICS IL2	9	PepMix SARS-CoV-2 (N) 102	Naive	MF4	0.0884
ICS IL2	9	PepMix SARS-CoV-2 (N) 102	Naive	MF5	0.2041
ICS IL2	9	PepMix SARS-CoV-2 (N) 102	Naive	MF6	0.0827
ICS IL2	20	PepMix SARS-CoV-2 (N) 102	Conv.	MF7	0.202
ICS IL2	20	PepMix SARS-CoV-2 (N) 102	Conv.	MF8	0.1778
ICS IL2	20	PepMix SARS-CoV-2 (N) 102	Conv.	MF9	0.1712
ICS IL2	20	PepMix SARS-CoV-2 (N) 102	αCD40.RBD	MF13	0.0893
ICS IL2	20	PepMix SARS-CoV-2 (N) 102	Conv.	MF10	0.1723
ICS IL2	20	PepMix SARS-CoV-2 (N) 102	αCD40.RBD	MF14	0.2673
ICS IL2	20	PepMix SARS-CoV-2 (N) 102	αCD40.RBD	MF15	0.0681
ICS IL2	20	PepMix SARS-CoV-2 (N) 102	αCD40.RBD	MF16	0.1365
ICS IL2	20	PepMix SARS-CoV-2 (N) 102	Conv.	MF11	0.2246
ICS IL2	20	PepMix SARS-CoV-2 (N) 102	αCD40.RBD	MF17	0.1217
ICS IL2	20	PepMix SARS-CoV-2 (N) 102	Conv.	MF12	0.0442
ICS IL2	20	PepMix SARS-CoV-2 (N) 102	αCD40.RBD	MF18	0.0367
ICS IL2	20	PepMix SARS-CoV-2 (N) 102	Naive	MF1	0.1029
ICS IL2	20	PepMix SARS-CoV-2 (N) 102	Naive	MF2	0.2504
ICS IL2	20	PepMix SARS-CoV-2 (N) 102	Naive	MF3	0.1109
ICS IL2	20	PepMix SARS-CoV-2 (N) 102	Naive	MF4	0.0707
ICS IL2	20	PepMix SARS-CoV-2 (N) 102	Naive	MF5	0.1088
ICS IL2	20	PepMix SARS-CoV-2 (N) 102	Naive	MF6	0.0495
ICS IFNg	-35	NS	Conv.	MF7	0.029
ICS IFNg	-35	NS	Conv.	MF8	0.0209
ICS IFNg	-35	NS	Conv.	MF9	0.0033
ICS IFNg	-35	NS	αCD40.RBD	MF13	0.0043
ICS IFNg	-35	NS	Conv.	MF10	0.0065
ICS IFNg	-35	NS	αCD40.RBD	MF14	0.0053
ICS IFNg	-35	NS	αCD40.RBD	MF15	0.0088
ICS IFNg	-35	NS	αCD40.RBD	MF16	0.0063
ICS IFNg	-35	NS	Conv.	MF11	0.0402
ICS IFNg	-35	NS	αCD40.RBD	MF17	0.0113
ICS IFNg	-35	NS	Conv.	MF12	0.001
ICS IFNg	-35	NS	αCD40.RBD	MF18	0.0041
ICS IFNg	-35	NS	Naive	MF1	0.0022
ICS IFNg	-35	NS	Naive	MF2	0.0273
ICS IFNg	-35	NS	Naive	MF3	0.0041
ICS IFNg	-35	NS	Naive	MF4	0.0073
ICS IFNg	-35	NS	Naive	MF5	0.0047
ICS IFNg	-35	NS	Naive	MF6	0.0048
ICS IFNg	-35	PepMix SARS-CoV-2 (S-RBD) 70	Conv.	MF7	0.0466
ICS IFNg	-35	PepMix SARS-CoV-2 (S-RBD) 70	Conv.	MF8	0.0316
ICS IFNg	-35	PepMix SARS-CoV-2 (S-RBD) 70	Conv.	MF9	0.0014
ICS IFNg	-35	PepMix SARS-CoV-2 (S-RBD) 70	αCD40.RBD	MF13	0.0039
ICS IFNg	-35	PepMix SARS-CoV-2 (S-RBD) 70	Conv.	MF10	0.0095
ICS IFNg	-35	PepMix SARS-CoV-2 (S-RBD) 70	αCD40.RBD	MF14	0.0145
ICS IFNg	-35	PepMix SARS-CoV-2 (S-RBD) 70	αCD40.RBD	MF15	0.007
ICS IFNg	-35	PepMix SARS-CoV-2 (S-RBD) 70	αCD40.RBD	MF16	0.0063
ICS IFNg	-35	PepMix SARS-CoV-2 (S-RBD) 70	Conv.	MF11	0.037
ICS IFNg	-35	PepMix SARS-CoV-2 (S-RBD) 70	αCD40.RBD	MF17	0.0117
ICS IFNg	-35	PepMix SARS-CoV-2 (S-RBD) 70	Conv.	MF12	0.001
ICS IFNg	-35	PepMix SARS-CoV-2 (S-RBD) 70	αCD40.RBD	MF18	0.0029
ICS IFNg	-35	PepMix SARS-CoV-2 (S-RBD) 70	Naive	MF1	0.0014
ICS IFNg	-35	PepMix SARS-CoV-2 (S-RBD) 70	Naive	MF2	0.0207
ICS IFNg	-35	PepMix SARS-CoV-2 (S-RBD) 70	Naive	MF3	0.0087
ICS IFNg	-35	PepMix SARS-CoV-2 (S-RBD) 70	Naive	MF4	0.0024
ICS IFNg	-35	PepMix SARS-CoV-2 (S-RBD) 70	Naive	MF5	0.0064
ICS IFNg	-35	PepMix SARS-CoV-2 (S-RBD) 70	Naive	MF6	0.002
ICS IFNg	-14	NS	Conv.	MF7	0.016
ICS IFNg	-14	NS	Conv.	MF8	0.0167
ICS IFNg	-14	NS	Conv.	MF9	0.0044
ICS IFNg	-14	NS	αCD40.RBD	MF13	0.0058
ICS IFNg	-14	NS	Conv.	MF10	0.0021
ICS IFNg	-14	NS	αCD40.RBD	MF14	0.0117
ICS IFNg	-14	NS	αCD40.RBD	MF15	0.0068
ICS IFNg	-14	NS	αCD40.RBD	MF16	0
ICS IFNg	-14	NS	Conv.	MF11	0.0105
ICS IFNg	-14	NS	αCD40.RBD	MF17	0.0207
ICS IFNg	-14	NS	Conv.	MF12	0.0023
ICS IFNg	-14	NS	αCD40.RBD	MF18	0.008
ICS IFNg	-14	NS	Naive	MF1	0.0016
ICS IFNg	-14	NS	Naive	MF2	0.0116
ICS IFNg	-14	NS	Naive	MF3	0.0012
ICS IFNg	-14	NS	Naive	MF4	ND
ICS IFNg	-14	NS	Naive	MF5	0.0045
ICS IFNg	-14	NS	Naive	MF6	0.006
ICS IFNg	-14	PepMix SARS-CoV-2 (S-RBD) 70	Conv.	MF7	0.0311
ICS IFNg	-14	PepMix SARS-CoV-2 (S-RBD) 70	Conv.	MF8	0.0079
ICS IFNg	-14	PepMix SARS-CoV-2 (S-RBD) 70	Conv.	MF9	0.0113
ICS IFNg	-14	PepMix SARS-CoV-2 (S-RBD) 70	αCD40.RBD	MF13	0.0188
ICS IFNg	-14	PepMix SARS-CoV-2 (S-RBD) 70	Conv.	MF10	0.0122
ICS IFNg	-14	PepMix SARS-CoV-2 (S-RBD) 70	αCD40.RBD	MF14	0.0273
ICS IFNg	-14	PepMix SARS-CoV-2 (S-RBD) 70	αCD40.RBD	MF15	0.0149
ICS IFNg	-14	PepMix SARS-CoV-2 (S-RBD) 70	αCD40.RBD	MF16	0.0079
ICS IFNg	-14	PepMix SARS-CoV-2 (S-RBD) 70	Conv.	MF11	0.024
ICS IFNg	-14	PepMix SARS-CoV-2 (S-RBD) 70	αCD40.RBD	MF17	0.0563
ICS IFNg	-14	PepMix SARS-CoV-2 (S-RBD) 70	Conv.	MF12	0.0019
ICS IFNg	-14	PepMix SARS-CoV-2 (S-RBD) 70	αCD40.RBD	MF18	0.0667
ICS IFNg	-14	PepMix SARS-CoV-2 (S-RBD) 70	Naive	MF1	0.0018
ICS IFNg	-14	PepMix SARS-CoV-2 (S-RBD) 70	Naive	MF2	0.0362
ICS IFNg	-14	PepMix SARS-CoV-2 (S-RBD) 70	Naive	MF3	0.0024
ICS IFNg	-14	PepMix SARS-CoV-2 (S-RBD) 70	Naive	MF4	ND
ICS IFNg	-14	PepMix SARS-CoV-2 (S-RBD) 70	Naive	MF5	0.004
ICS IFNg	-14	PepMix SARS-CoV-2 (S-RBD) 70	Naive	MF6	0.0071
ICS IFNg	9	NS	Conv.	MF7	0.0962
ICS IFNg	9	NS	Conv.	MF8	0.016
ICS IFNg	9	NS	Conv.	MF9	0.0091
ICS IFNg	9	NS	αCD40.RBD	MF13	0.0054
ICS IFNg	9	NS	Conv.	MF10	0.0086
ICS IFNg	9	NS	αCD40.RBD	MF14	0.1058
ICS IFNg	9	NS	αCD40.RBD	MF15	0.0066
ICS IFNg	9	NS	αCD40.RBD	MF16	0.1576
ICS IFNg	9	NS	Conv.	MF11	0.0117
ICS IFNg	9	NS	αCD40.RBD	MF17	0.037
ICS IFNg	9	NS	Conv.	MF12	0.0151
ICS IFNg	9	NS	αCD40.RBD	MF18	0.0129
ICS IFNg	9	NS	Naive	MF1	0.0087
ICS IFNg	9	NS	Naive	MF2	0.0367
ICS IFNg	9	NS	Naive	MF3	0.0358
ICS IFNg	9	NS	Naive	MF4	0.0108
ICS IFNg	9	NS	Naive	MF5	0.0308
ICS IFNg	9	NS	Naive	MF6	0.0039
ICS IFNg	9	PepMix SARS-CoV-2 (S-RBD) 70	Conv.	MF7	0.1198
ICS IFNg	9	PepMix SARS-CoV-2 (S-RBD) 70	Conv.	MF8	0.0598
ICS IFNg	9	PepMix SARS-CoV-2 (S-RBD) 70	Conv.	MF9	0.0275
ICS IFNg	9	PepMix SARS-CoV-2 (S-RBD) 70	αCD40.RBD	MF13	0.0302
ICS IFNg	9	PepMix SARS-CoV-2 (S-RBD) 70	Conv.	MF10	0.0213
ICS IFNg	9	PepMix SARS-CoV-2 (S-RBD) 70	αCD40.RBD	MF14	0.0627
ICS IFNg	9	PepMix SARS-CoV-2 (S-RBD) 70	αCD40.RBD	MF15	0.0069
ICS IFNg	9	PepMix SARS-CoV-2 (S-RBD) 70	αCD40.RBD	MF16	0.1018
ICS IFNg	9	PepMix SARS-CoV-2 (S-RBD) 70	Conv.	MF11	0.0448
ICS IFNg	9	PepMix SARS-CoV-2 (S-RBD) 70	αCD40.RBD	MF17	0.0606
ICS IFNg	9	PepMix SARS-CoV-2 (S-RBD) 70	Conv.	MF12	0.038
ICS IFNg	9	PepMix SARS-CoV-2 (S-RBD) 70	αCD40.RBD	MF18	0.0143
ICS IFNg	9	PepMix SARS-CoV-2 (S-RBD) 70	Naive	MF1	0.1457
ICS IFNg	9	PepMix SARS-CoV-2 (S-RBD) 70	Naive	MF2	0.3848
ICS IFNg	9	PepMix SARS-CoV-2 (S-RBD) 70	Naive	MF3	0.0586
ICS IFNg	9	PepMix SARS-CoV-2 (S-RBD) 70	Naive	MF4	0.0559
ICS IFNg	9	PepMix SARS-CoV-2 (S-RBD) 70	Naive	MF5	0.2001
ICS IFNg	9	PepMix SARS-CoV-2 (S-RBD) 70	Naive	MF6	0.0231
ICS IFNg	20	NS	Conv.	MF7	0.1158
ICS IFNg	20	NS	Conv.	MF8	0.0506
ICS IFNg	20	NS	Conv.	MF9	0.0094
ICS IFNg	20	NS	αCD40.RBD	MF13	0.0258
ICS IFNg	20	NS	Conv.	MF10	0.0132
ICS IFNg	20	NS	αCD40.RBD	MF14	0.0346
ICS IFNg	20	NS	αCD40.RBD	MF15	0.0098
ICS IFNg	20	NS	αCD40.RBD	MF16	0.0169
ICS IFNg	20	NS	Conv.	MF11	0.0553
ICS IFNg	20	NS	αCD40.RBD	MF17	0.0098
ICS IFNg	20	NS	Conv.	MF12	0.0097
ICS IFNg	20	NS	αCD40.RBD	MF18	0.0039
ICS IFNg	20	NS	Naive	MF1	0.0067
ICS IFNg	20	NS	Naive	MF2	0.0533
ICS IFNg	20	NS	Naive	MF3	0.042
ICS IFNg	20	NS	Naive	MF4	0.0113
ICS IFNg	20	NS	Naive	MF5	0.0264
ICS IFNg	20	NS	Naive	MF6	0.0047
ICS IFNg	20	PepMix SARS-CoV-2 (S-RBD) 70	Conv.	MF7	0.1118
ICS IFNg	20	PepMix SARS-CoV-2 (S-RBD) 70	Conv.	MF8	0.0601
ICS IFNg	20	PepMix SARS-CoV-2 (S-RBD) 70	Conv.	MF9	0.0099
ICS IFNg	20	PepMix SARS-CoV-2 (S-RBD) 70	αCD40.RBD	MF13	0.0629
ICS IFNg	20	PepMix SARS-CoV-2 (S-RBD) 70	Conv.	MF10	0.1112
ICS IFNg	20	PepMix SARS-CoV-2 (S-RBD) 70	αCD40.RBD	MF14	0.0674
ICS IFNg	20	PepMix SARS-CoV-2 (S-RBD) 70	αCD40.RBD	MF15	0.0078
ICS IFNg	20	PepMix SARS-CoV-2 (S-RBD) 70	αCD40.RBD	MF16	0.0564
ICS IFNg	20	PepMix SARS-CoV-2 (S-RBD) 70	Conv.	MF11	0.0448
ICS IFNg	20	PepMix SARS-CoV-2 (S-RBD) 70	αCD40.RBD	MF17	0.0266
ICS IFNg	20	PepMix SARS-CoV-2 (S-RBD) 70	Conv.	MF12	0.0113
ICS IFNg	20	PepMix SARS-CoV-2 (S-RBD) 70	αCD40.RBD	MF18	0.0194
ICS IFNg	20	PepMix SARS-CoV-2 (S-RBD) 70	Naive	MF1	0.0249
ICS IFNg	20	PepMix SARS-CoV-2 (S-RBD) 70	Naive	MF2	0.2315
ICS IFNg	20	PepMix SARS-CoV-2 (S-RBD) 70	Naive	MF3	0.0807
ICS IFNg	20	PepMix SARS-CoV-2 (S-RBD) 70	Naive	MF4	0.0338
ICS IFNg	20	PepMix SARS-CoV-2 (S-RBD) 70	Naive	MF5	0.0729
ICS IFNg	20	PepMix SARS-CoV-2 (S-RBD) 70	Naive	MF6	0.0111
ICS IFNg	-35	PepMix SARS-CoV-2 (N) 102	Conv.	MF7	0.029
ICS IFNg	-35	PepMix SARS-CoV-2 (N) 102	Conv.	MF8	0.046
ICS IFNg	-35	PepMix SARS-CoV-2 (N) 102	Conv.	MF9	0.019
ICS IFNg	-35	PepMix SARS-CoV-2 (N) 102	αCD40.RBD	MF13	0.019
ICS IFNg	-35	PepMix SARS-CoV-2 (N) 102	Conv.	MF10	0.006
ICS IFNg	-35	PepMix SARS-CoV-2 (N) 102	αCD40.RBD	MF14	0.045
ICS IFNg	-35	PepMix SARS-CoV-2 (N) 102	αCD40.RBD	MF15	0.008
ICS IFNg	-35	PepMix SARS-CoV-2 (N) 102	αCD40.RBD	MF16	0.021
ICS IFNg	-35	PepMix SARS-CoV-2 (N) 102	Conv.	MF11	0.034
ICS IFNg	-35	PepMix SARS-CoV-2 (N) 102	αCD40.RBD	MF17	0.018
ICS IFNg	-35	PepMix SARS-CoV-2 (N) 102	Conv.	MF12	0.002
ICS IFNg	-35	PepMix SARS-CoV-2 (N) 102	αCD40.RBD	MF18	0.031
ICS IFNg	-35	PepMix SARS-CoV-2 (N) 102	Naive	MF1	0.001
ICS IFNg	-35	PepMix SARS-CoV-2 (N) 102	Naive	MF2	0.028
ICS IFNg	-35	PepMix SARS-CoV-2 (N) 102	Naive	MF3	0.007
ICS IFNg	-35	PepMix SARS-CoV-2 (N) 102	Naive	MF4	0.007
ICS IFNg	-35	PepMix SARS-CoV-2 (N) 102	Naive	MF5	0.005
ICS IFNg	-35	PepMix SARS-CoV-2 (N) 102	Naive	MF6	0.002
ICS IFNg	-14	PepMix SARS-CoV-2 (N) 102	Conv.	MF7	ND
ICS IFNg	-14	PepMix SARS-CoV-2 (N) 102	Conv.	MF8	0.05
ICS IFNg	-14	PepMix SARS-CoV-2 (N) 102	Conv.	MF9	0.02
ICS IFNg	-14	PepMix SARS-CoV-2 (N) 102	αCD40.RBD	MF13	0.021
ICS IFNg	-14	PepMix SARS-CoV-2 (N) 102	Conv.	MF10	0.003
ICS IFNg	-14	PepMix SARS-CoV-2 (N) 102	αCD40.RBD	MF14	0.036
ICS IFNg	-14	PepMix SARS-CoV-2 (N) 102	αCD40.RBD	MF15	0.015
ICS IFNg	-14	PepMix SARS-CoV-2 (N) 102	αCD40.RBD	MF16	ND
ICS IFNg	-14	PepMix SARS-CoV-2 (N) 102	Conv.	MF11	0.024
ICS IFNg	-14	PepMix SARS-CoV-2 (N) 102	αCD40.RBD	MF17	0.047
ICS IFNg	-14	PepMix SARS-CoV-2 (N) 102	Conv.	MF12	0.013
ICS IFNg	-14	PepMix SARS-CoV-2 (N) 102	αCD40.RBD	MF18	0.017
ICS IFNg	-14	PepMix SARS-CoV-2 (N) 102	Naive	MF1	0.002
ICS IFNg	-14	PepMix SARS-CoV-2 (N) 102	Naive	MF2	0.011
ICS IFNg	-14	PepMix SARS-CoV-2 (N) 102	Naive	MF3	0.004
ICS IFNg	-14	PepMix SARS-CoV-2 (N) 102	Naive	MF4	ND
ICS IFNg	-14	PepMix SARS-CoV-2 (N) 102	Naive	MF5	0.01
ICS IFNg	-14	PepMix SARS-CoV-2 (N) 102	Naive	MF6	0.006
ICS IFNg	9	PepMix SARS-CoV-2 (N) 102	Conv.	MF7	0.514
ICS IFNg	9	PepMix SARS-CoV-2 (N) 102	Conv.	MF8	0.498
ICS IFNg	9	PepMix SARS-CoV-2 (N) 102	Conv.	MF9	0.609
ICS IFNg	9	PepMix SARS-CoV-2 (N) 102	αCD40.RBD	MF13	0.182
ICS IFNg	9	PepMix SARS-CoV-2 (N) 102	Conv.	MF10	0.416
ICS IFNg	9	PepMix SARS-CoV-2 (N) 102	αCD40.RBD	MF14	1.261
ICS IFNg	9	PepMix SARS-CoV-2 (N) 102	αCD40.RBD	MF15	0.145
ICS IFNg	9	PepMix SARS-CoV-2 (N) 102	αCD40.RBD	MF16	0.558
ICS IFNg	9	PepMix SARS-CoV-2 (N) 102	Conv.	MF11	0.411
ICS IFNg	9	PepMix SARS-CoV-2 (N) 102	αCD40.RBD	MF17	0.449
ICS IFNg	9	PepMix SARS-CoV-2 (N) 102	Conv.	MF12	0.224
ICS IFNg	9	PepMix SARS-CoV-2 (N) 102	αCD40.RBD	MF18	0.089
ICS IFNg	9	PepMix SARS-CoV-2 (N) 102	Naive	MF1	0.347
ICS IFNg	9	PepMix SARS-CoV-2 (N) 102	Naive	MF2	0.626
ICS IFNg	9	PepMix SARS-CoV-2 (N) 102	Naive	MF3	0.328
ICS IFNg	9	PepMix SARS-CoV-2 (N) 102	Naive	MF4	0.122
ICS IFNg	9	PepMix SARS-CoV-2 (N) 102	Naive	MF5	0.4
ICS IFNg	9	PepMix SARS-CoV-2 (N) 102	Naive	MF6	0.133
ICS IFNg	20	PepMix SARS-CoV-2 (N) 102	Conv.	MF7	0.275
ICS IFNg	20	PepMix SARS-CoV-2 (N) 102	Conv.	MF8	0.197
ICS IFNg	20	PepMix SARS-CoV-2 (N) 102	Conv.	MF9	0.156
ICS IFNg	20	PepMix SARS-CoV-2 (N) 102	αCD40.RBD	MF13	0.108
ICS IFNg	20	PepMix SARS-CoV-2 (N) 102	Conv.	MF10	0.175
ICS IFNg	20	PepMix SARS-CoV-2 (N) 102	αCD40.RBD	MF14	0.338
ICS IFNg	20	PepMix SARS-CoV-2 (N) 102	αCD40.RBD	MF15	0.06
ICS IFNg	20	PepMix SARS-CoV-2 (N) 102	αCD40.RBD	MF16	0.151
ICS IFNg	20	PepMix SARS-CoV-2 (N) 102	Conv.	MF11	0.234
ICS IFNg	20	PepMix SARS-CoV-2 (N) 102	αCD40.RBD	MF17	0.186
ICS IFNg	20	PepMix SARS-CoV-2 (N) 102	Conv.	MF12	0.047
ICS IFNg	20	PepMix SARS-CoV-2 (N) 102	αCD40.RBD	MF18	0.045
ICS IFNg	20	PepMix SARS-CoV-2 (N) 102	Naive	MF1	0.109
ICS IFNg	20	PepMix SARS-CoV-2 (N) 102	Naive	MF2	0.366
ICS IFNg	20	PepMix SARS-CoV-2 (N) 102	Naive	MF3	0.104
ICS IFNg	20	PepMix SARS-CoV-2 (N) 102	Naive	MF4	0.067
ICS IFNg	20	PepMix SARS-CoV-2 (N) 102	Naive	MF5	0.13
ICS IFNg	20	PepMix SARS-CoV-2 (N) 102	Naive	MF6	0.054
ICS TNFa	-35	NS	Conv.	MF7	0.0363
ICS TNFa	-35	NS	Conv.	MF8	0.0575
ICS TNFa	-35	NS	Conv.	MF9	0.0017
ICS TNFa	-35	NS	αCD40.RBD	MF13	0.0043
ICS TNFa	-35	NS	Conv.	MF10	0.0098
ICS TNFa	-35	NS	αCD40.RBD	MF14	0.0406
ICS TNFa	-35	NS	αCD40.RBD	MF15	0.0165
ICS TNFa	-35	NS	αCD40.RBD	MF16	0.0229
ICS TNFa	-35	NS	Conv.	MF11	0.0035
ICS TNFa	-35	NS	αCD40.RBD	MF17	0.0466
ICS TNFa	-35	NS	Conv.	MF12	0.008
ICS TNFa	-35	NS	αCD40.RBD	MF18	0.0095
ICS TNFa	-35	NS	Naive	MF1	0.0007
ICS TNFa	-35	NS	Naive	MF2	0.0477
ICS TNFa	-35	NS	Naive	MF3	0.0083
ICS TNFa	-35	NS	Naive	MF4	0.0376
ICS TNFa	-35	NS	Naive	MF5	0.0367
ICS TNFa	-35	NS	Naive	MF6	0.0058
ICS TNFa	-35	PepMix SARS-CoV-2 (S-RBD) 70	Conv.	MF7	0.0078
ICS TNFa	-35	PepMix SARS-CoV-2 (S-RBD) 70	Conv.	MF8	0.0949
ICS TNFa	-35	PepMix SARS-CoV-2 (S-RBD) 70	Conv.	MF9	0.0029
ICS TNFa	-35	PepMix SARS-CoV-2 (S-RBD) 70	αCD40.RBD	MF13	0.0058
ICS TNFa	-35	PepMix SARS-CoV-2 (S-RBD) 70	Conv.	MF10	0.0082
ICS TNFa	-35	PepMix SARS-CoV-2 (S-RBD) 70	αCD40.RBD	MF14	0.0589
ICS TNFa	-35	PepMix SARS-CoV-2 (S-RBD) 70	αCD40.RBD	MF15	0.007
ICS TNFa	-35	PepMix SARS-CoV-2 (S-RBD) 70	αCD40.RBD	MF16	0.0125
ICS TNFa	-35	PepMix SARS-CoV-2 (S-RBD) 70	Conv.	MF11	0.0071
ICS TNFa	-35	PepMix SARS-CoV-2 (S-RBD) 70	αCD40.RBD	MF17	0.0548
ICS TNFa	-35	PepMix SARS-CoV-2 (S-RBD) 70	Conv.	MF12	0.0048
ICS TNFa	-35	PepMix SARS-CoV-2 (S-RBD) 70	αCD40.RBD	MF18	0.0015
ICS TNFa	-35	PepMix SARS-CoV-2 (S-RBD) 70	Naive	MF1	0.0014
ICS TNFa	-35	PepMix SARS-CoV-2 (S-RBD) 70	Naive	MF2	0.0705
ICS TNFa	-35	PepMix SARS-CoV-2 (S-RBD) 70	Naive	MF3	0.0174
ICS TNFa	-35	PepMix SARS-CoV-2 (S-RBD) 70	Naive	MF4	0.0309
ICS TNFa	-35	PepMix SARS-CoV-2 (S-RBD) 70	Naive	MF5	0.0446
ICS TNFa	-35	PepMix SARS-CoV-2 (S-RBD) 70	Naive	MF6	0.0099
ICS TNFa	-14	NS	Conv.	MF7	0.0534
ICS TNFa	-14	NS	Conv.	MF8	0.0434
ICS TNFa	-14	NS	Conv.	MF9	0.003
ICS TNFa	-14	NS	αCD40.RBD	MF13	0.0048
ICS TNFa	-14	NS	Conv.	MF10	0.0062
ICS TNFa	-14	NS	αCD40.RBD	MF14	0.0381
ICS TNFa	-14	NS	αCD40.RBD	MF15	0.0102
ICS TNFa	-14	NS	αCD40.RBD	MF16	0.0039
ICS TNFa	-14	NS	Conv.	MF11	0.0039
ICS TNFa	-14	NS	αCD40.RBD	MF17	0.0546
ICS TNFa	-14	NS	Conv.	MF12	0.0023
ICS TNFa	-14	NS	αCD40.RBD	MF18	0.0199
ICS TNFa	-14	NS	Naive	MF1	0.0062
ICS TNFa	-14	NS	Naive	MF2	0.0692
ICS TNFa	-14	NS	Naive	MF3	0.0047
ICS TNFa	-14	NS	Naive	MF4	ND
ICS TNFa	-14	NS	Naive	MF5	0.0245
ICS TNFa	-14	NS	Naive	MF6	0.0012
ICS TNFa	-14	PepMix SARS-CoV-2 (S-RBD) 70	Conv.	MF7	0.0554
ICS TNFa	-14	PepMix SARS-CoV-2 (S-RBD) 70	Conv.	MF8	0.0708
ICS TNFa	-14	PepMix SARS-CoV-2 (S-RBD) 70	Conv.	MF9	0.0032
ICS TNFa	-14	PepMix SARS-CoV-2 (S-RBD) 70	αCD40.RBD	MF13	0.0075
ICS TNFa	-14	PepMix SARS-CoV-2 (S-RBD) 70	Conv.	MF10	0.0133
ICS TNFa	-14	PepMix SARS-CoV-2 (S-RBD) 70	αCD40.RBD	MF14	0.0328
ICS TNFa	-14	PepMix SARS-CoV-2 (S-RBD) 70	αCD40.RBD	MF15	0.0149
ICS TNFa	-14	PepMix SARS-CoV-2 (S-RBD) 70	αCD40.RBD	MF16	0.0184
ICS TNFa	-14	PepMix SARS-CoV-2 (S-RBD) 70	Conv.	MF11	0.0135
ICS TNFa	-14	PepMix SARS-CoV-2 (S-RBD) 70	αCD40.RBD	MF17	0.0662
ICS TNFa	-14	PepMix SARS-CoV-2 (S-RBD) 70	Conv.	MF12	0.0029
ICS TNFa	-14	PepMix SARS-CoV-2 (S-RBD) 70	αCD40.RBD	MF18	0.0147
ICS TNFa	-14	PepMix SARS-CoV-2 (S-RBD) 70	Naive	MF1	0.0055
ICS TNFa	-14	PepMix SARS-CoV-2 (S-RBD) 70	Naive	MF2	0.0879
ICS TNFa	-14	PepMix SARS-CoV-2 (S-RBD) 70	Naive	MF3	0.0048
ICS TNFa	-14	PepMix SARS-CoV-2 (S-RBD) 70	Naive	MF4	ND
ICS TNFa	-14	PepMix SARS-CoV-2 (S-RBD) 70	Naive	MF5	0.007
ICS TNFa	-14	PepMix SARS-CoV-2 (S-RBD) 70	Naive	MF6	0.0041
ICS TNFa	9	NS	Conv.	MF7	0.0529
ICS TNFa	9	NS	Conv.	MF8	0.0639
ICS TNFa	9	NS	Conv.	MF9	0.0351
ICS TNFa	9	NS	αCD40.RBD	MF13	0.0082
ICS TNFa	9	NS	Conv.	MF10	0.0266
ICS TNFa	9	NS	αCD40.RBD	MF14	0.0862
ICS TNFa	9	NS	αCD40.RBD	MF15	0.0283
ICS TNFa	9	NS	αCD40.RBD	MF16	0.0539
ICS TNFa	9	NS	Conv.	MF11	0.0081
ICS TNFa	9	NS	αCD40.RBD	MF17	0.085
ICS TNFa	9	NS	Conv.	MF12	0.0232
ICS TNFa	9	NS	αCD40.RBD	MF18	0.0103
ICS TNFa	9	NS	Naive	MF1	0.0208
ICS TNFa	9	NS	Naive	MF2	0.1301
ICS TNFa	9	NS	Naive	MF3	0.0238
ICS TNFa	9	NS	Naive	MF4	0.0638
ICS TNFa	9	NS	Naive	MF5	0.1652
ICS TNFa	9	NS	Naive	MF6	0.0031
ICS TNFa	9	PepMix SARS-CoV-2 (S-RBD) 70	Conv.	MF7	0.049
ICS TNFa	9	PepMix SARS-CoV-2 (S-RBD) 70	Conv.	MF8	0.0761
ICS TNFa	9	PepMix SARS-CoV-2 (S-RBD) 70	Conv.	MF9	0.0179
ICS TNFa	9	PepMix SARS-CoV-2 (S-RBD) 70	αCD40.RBD	MF13	0.0076
ICS TNFa	9	PepMix SARS-CoV-2 (S-RBD) 70	Conv.	MF10	0.0222
ICS TNFa	9	PepMix SARS-CoV-2 (S-RBD) 70	αCD40.RBD	MF14	0.0817
ICS TNFa	9	PepMix SARS-CoV-2 (S-RBD) 70	αCD40.RBD	MF15	0.0284
ICS TNFa	9	PepMix SARS-CoV-2 (S-RBD) 70	αCD40.RBD	MF16	0.0641
ICS TNFa	9	PepMix SARS-CoV-2 (S-RBD) 70	Conv.	MF11	0.0153
ICS TNFa	9	PepMix SARS-CoV-2 (S-RBD) 70	αCD40.RBD	MF17	0.0664
ICS TNFa	9	PepMix SARS-CoV-2 (S-RBD) 70	Conv.	MF12	0.0067
ICS TNFa	9	PepMix SARS-CoV-2 (S-RBD) 70	αCD40.RBD	MF18	0.0175
ICS TNFa	9	PepMix SARS-CoV-2 (S-RBD) 70	Naive	MF1	0.0406
ICS TNFa	9	PepMix SARS-CoV-2 (S-RBD) 70	Naive	MF2	0.2033
ICS TNFa	9	PepMix SARS-CoV-2 (S-RBD) 70	Naive	MF3	0.0322
ICS TNFa	9	PepMix SARS-CoV-2 (S-RBD) 70	Naive	MF4	0.0726
ICS TNFa	9	PepMix SARS-CoV-2 (S-RBD) 70	Naive	MF5	0.1546
ICS TNFa	9	PepMix SARS-CoV-2 (S-RBD) 70	Naive	MF6	0.0085
ICS TNFa	20	NS	Conv.	MF7	0.0269
ICS TNFa	20	NS	Conv.	MF8	0.0885
ICS TNFa	20	NS	Conv.	MF9	0.0104
ICS TNFa	20	NS	αCD40.RBD	MF13	0.0176
ICS TNFa	20	NS	Conv.	MF10	0.0083
ICS TNFa	20	NS	αCD40.RBD	MF14	0.0631
ICS TNFa	20	NS	αCD40.RBD	MF15	0.0319
ICS TNFa	20	NS	αCD40.RBD	MF16	0.0509
ICS TNFa	20	NS	Conv.	MF11	0.0156
ICS TNFa	20	NS	αCD40.RBD	MF17	0.0213
ICS TNFa	20	NS	Conv.	MF12	0.0121
ICS TNFa	20	NS	αCD40.RBD	MF18	0.0285
ICS TNFa	20	NS	Naive	MF1	0.0218
ICS TNFa	20	NS	Naive	MF2	0.1598
ICS TNFa	20	NS	Naive	MF3	0.0047
ICS TNFa	20	NS	Naive	MF4	0.0835
ICS TNFa	20	NS	Naive	MF5	0.3544
ICS TNFa	20	NS	Naive	MF6	0.007
ICS TNFa	20	PepMix SARS-CoV-2 (S-RBD) 70	Conv.	MF7	0.0383
ICS TNFa	20	PepMix SARS-CoV-2 (S-RBD) 70	Conv.	MF8	0.0852
ICS TNFa	20	PepMix SARS-CoV-2 (S-RBD) 70	Conv.	MF9	0.0055
ICS TNFa	20	PepMix SARS-CoV-2 (S-RBD) 70	αCD40.RBD	MF13	0.0227
ICS TNFa	20	PepMix SARS-CoV-2 (S-RBD) 70	Conv.	MF10	0.0308
ICS TNFa	20	PepMix SARS-CoV-2 (S-RBD) 70	αCD40.RBD	MF14	0.0674
ICS TNFa	20	PepMix SARS-CoV-2 (S-RBD) 70	αCD40.RBD	MF15	0.0155
ICS TNFa	20	PepMix SARS-CoV-2 (S-RBD) 70	αCD40.RBD	MF16	0.0393
ICS TNFa	20	PepMix SARS-CoV-2 (S-RBD) 70	Conv.	MF11	0.0182
ICS TNFa	20	PepMix SARS-CoV-2 (S-RBD) 70	αCD40.RBD	MF17	0.0316
ICS TNFa	20	PepMix SARS-CoV-2 (S-RBD) 70	Conv.	MF12	0.0099
ICS TNFa	20	PepMix SARS-CoV-2 (S-RBD) 70	αCD40.RBD	MF18	0.0263
ICS TNFa	20	PepMix SARS-CoV-2 (S-RBD) 70	Naive	MF1	0.0217
ICS TNFa	20	PepMix SARS-CoV-2 (S-RBD) 70	Naive	MF2	0.1503
ICS TNFa	20	PepMix SARS-CoV-2 (S-RBD) 70	Naive	MF3	0.0346
ICS TNFa	20	PepMix SARS-CoV-2 (S-RBD) 70	Naive	MF4	0.0867
ICS TNFa	20	PepMix SARS-CoV-2 (S-RBD) 70	Naive	MF5	0.2794
ICS TNFa	20	PepMix SARS-CoV-2 (S-RBD) 70	Naive	MF6	0.0061
ICS TNFa	-35	PepMix SARS-CoV-2 (N) 102	Conv.	MF7	0.0218
ICS TNFa	-35	PepMix SARS-CoV-2 (N) 102	Conv.	MF8	0.1099
ICS TNFa	-35	PepMix SARS-CoV-2 (N) 102	Conv.	MF9	0.0118
ICS TNFa	-35	PepMix SARS-CoV-2 (N) 102	αCD40.RBD	MF13	0.0019
ICS TNFa	-35	PepMix SARS-CoV-2 (N) 102	Conv.	MF10	0.0069
ICS TNFa	-35	PepMix SARS-CoV-2 (N) 102	αCD40.RBD	MF14	0.057
ICS TNFa	-35	PepMix SARS-CoV-2 (N) 102	αCD40.RBD	MF15	0.0132
ICS TNFa	-35	PepMix SARS-CoV-2 (N) 102	αCD40.RBD	MF16	0.0085
ICS TNFa	-35	PepMix SARS-CoV-2 (N) 102	Conv.	MF11	0.0163
ICS TNFa	-35	PepMix SARS-CoV-2 (N) 102	αCD40.RBD	MF17	0.0513
ICS TNFa	-35	PepMix SARS-CoV-2 (N) 102	Conv.	MF12	0
ICS TNFa	-35	PepMix SARS-CoV-2 (N) 102	αCD40.RBD	MF18	0.0123
ICS TNFa	-35	PepMix SARS-CoV-2 (N) 102	Naive	MF1	0.0035
ICS TNFa	-35	PepMix SARS-CoV-2 (N) 102	Naive	MF2	0.071
ICS TNFa	-35	PepMix SARS-CoV-2 (N) 102	Naive	MF3	0.0062
ICS TNFa	-35	PepMix SARS-CoV-2 (N) 102	Naive	MF4	0.0211
ICS TNFa	-35	PepMix SARS-CoV-2 (N) 102	Naive	MF5	0.0468
ICS TNFa	-35	PepMix SARS-CoV-2 (N) 102	Naive	MF6	0.0032
ICS TNFa	-14	PepMix SARS-CoV-2 (N) 102	Conv.	MF7	ND
ICS TNFa	-14	PepMix SARS-CoV-2 (N) 102	Conv.	MF8	0.1025
ICS TNFa	-14	PepMix SARS-CoV-2 (N) 102	Conv.	MF9	0.0084
ICS TNFa	-14	PepMix SARS-CoV-2 (N) 102	αCD40.RBD	MF13	0.0114
ICS TNFa	-14	PepMix SARS-CoV-2 (N) 102	Conv.	MF10	0.0044
ICS TNFa	-14	PepMix SARS-CoV-2 (N) 102	αCD40.RBD	MF14	0.038
ICS TNFa	-14	PepMix SARS-CoV-2 (N) 102	αCD40.RBD	MF15	0.0257
ICS TNFa	-14	PepMix SARS-CoV-2 (N) 102	αCD40.RBD	MF16	ND
ICS TNFa	-14	PepMix SARS-CoV-2 (N) 102	Conv.	MF11	0.0142
ICS TNFa	-14	PepMix SARS-CoV-2 (N) 102	αCD40.RBD	MF17	0.0677
ICS TNFa	-14	PepMix SARS-CoV-2 (N) 102	Conv.	MF12	0.0052
ICS TNFa	-14	PepMix SARS-CoV-2 (N) 102	αCD40.RBD	MF18	0.0117
ICS TNFa	-14	PepMix SARS-CoV-2 (N) 102	Naive	MF1	0.0054
ICS TNFa	-14	PepMix SARS-CoV-2 (N) 102	Naive	MF2	0.0629
ICS TNFa	-14	PepMix SARS-CoV-2 (N) 102	Naive	MF3	0.0023
ICS TNFa	-14	PepMix SARS-CoV-2 (N) 102	Naive	MF4	ND
ICS TNFa	-14	PepMix SARS-CoV-2 (N) 102	Naive	MF5	0.0191
ICS TNFa	-14	PepMix SARS-CoV-2 (N) 102	Naive	MF6	0.0022
ICS TNFa	9	PepMix SARS-CoV-2 (N) 102	Conv.	MF7	0.2113
ICS TNFa	9	PepMix SARS-CoV-2 (N) 102	Conv.	MF8	0.1841
ICS TNFa	9	PepMix SARS-CoV-2 (N) 102	Conv.	MF9	0.1083
ICS TNFa	9	PepMix SARS-CoV-2 (N) 102	αCD40.RBD	MF13	0.0565
ICS TNFa	9	PepMix SARS-CoV-2 (N) 102	Conv.	MF10	0.1832
ICS TNFa	9	PepMix SARS-CoV-2 (N) 102	αCD40.RBD	MF14	0.3919
ICS TNFa	9	PepMix SARS-CoV-2 (N) 102	αCD40.RBD	MF15	0.0462
ICS TNFa	9	PepMix SARS-CoV-2 (N) 102	αCD40.RBD	MF16	0.1168
ICS TNFa	9	PepMix SARS-CoV-2 (N) 102	Conv.	MF11	0.0552
ICS TNFa	9	PepMix SARS-CoV-2 (N) 102	αCD40.RBD	MF17	0.119
ICS TNFa	9	PepMix SARS-CoV-2 (N) 102	Conv.	MF12	0.0411
ICS TNFa	9	PepMix SARS-CoV-2 (N) 102	αCD40.RBD	MF18	0.0244
ICS TNFa	9	PepMix SARS-CoV-2 (N) 102	Naive	MF1	0.0654
ICS TNFa	9	PepMix SARS-CoV-2 (N) 102	Naive	MF2	0.2337
ICS TNFa	9	PepMix SARS-CoV-2 (N) 102	Naive	MF3	0.1191
ICS TNFa	9	PepMix SARS-CoV-2 (N) 102	Naive	MF4	0.1184
ICS TNFa	9	PepMix SARS-CoV-2 (N) 102	Naive	MF5	0.2116
ICS TNFa	9	PepMix SARS-CoV-2 (N) 102	Naive	MF6	0.0296
ICS TNFa	20	PepMix SARS-CoV-2 (N) 102	Conv.	MF7	0.1374
ICS TNFa	20	PepMix SARS-CoV-2 (N) 102	Conv.	MF8	0.1778
ICS TNFa	20	PepMix SARS-CoV-2 (N) 102	Conv.	MF9	0.089
ICS TNFa	20	PepMix SARS-CoV-2 (N) 102	αCD40.RBD	MF13	0.0357
ICS TNFa	20	PepMix SARS-CoV-2 (N) 102	Conv.	MF10	0.074
ICS TNFa	20	PepMix SARS-CoV-2 (N) 102	αCD40.RBD	MF14	0.2074
ICS TNFa	20	PepMix SARS-CoV-2 (N) 102	αCD40.RBD	MF15	0.0381
ICS TNFa	20	PepMix SARS-CoV-2 (N) 102	αCD40.RBD	MF16	0.0729
ICS TNFa	20	PepMix SARS-CoV-2 (N) 102	Conv.	MF11	0.0708
ICS TNFa	20	PepMix SARS-CoV-2 (N) 102	αCD40.RBD	MF17	0.0658
ICS TNFa	20	PepMix SARS-CoV-2 (N) 102	Conv.	MF12	0.027
ICS TNFa	20	PepMix SARS-CoV-2 (N) 102	αCD40.RBD	MF18	0.0328
ICS TNFa	20	PepMix SARS-CoV-2 (N) 102	Naive	MF1	0.049
ICS TNFa	20	PepMix SARS-CoV-2 (N) 102	Naive	MF2	0.2345
ICS TNFa	20	PepMix SARS-CoV-2 (N) 102	Naive	MF3	0.0679
ICS TNFa	20	PepMix SARS-CoV-2 (N) 102	Naive	MF4	0.1266
ICS TNFa	20	PepMix SARS-CoV-2 (N) 102	Naive	MF5	0.3937
ICS TNFa	20	PepMix SARS-CoV-2 (N) 102	Naive	MF6	0.0175
ICS IL17	-35	NS	Conv.	MF7	0
ICS IL17	-35	NS	Conv.	MF8	0.00523
ICS IL17	-35	NS	Conv.	MF9	0
ICS IL17	-35	NS	αCD40.RBD	MF13	0.00214
ICS IL17	-35	NS	Conv.	MF10	0.00327
ICS IL17	-35	NS	αCD40.RBD	MF14	0.00705
ICS IL17	-35	NS	αCD40.RBD	MF15	0
ICS IL17	-35	NS	αCD40.RBD	MF16	0
ICS IL17	-35	NS	Conv.	MF11	0.00175
ICS IL17	-35	NS	αCD40.RBD	MF17	0.00756
ICS IL17	-35	NS	Conv.	MF12	0
ICS IL17	-35	NS	αCD40.RBD	MF18	0
ICS IL17	-35	NS	Naive	MF1	0
ICS IL17	-35	NS	Naive	MF2	0.00454
ICS IL17	-35	NS	Naive	MF3	0.00276
ICS IL17	-35	NS	Naive	MF4	0.00121
ICS IL17	-35	NS	Naive	MF5	0.00282
ICS IL17	-35	NS	Naive	MF6	0.00191
ICS IL17	-35	PepMix SARS-CoV-2 (S-RBD) 70	Conv.	MF7	0.00777
ICS IL17	-35	PepMix SARS-CoV-2 (S-RBD) 70	Conv.	MF8	0.00904
ICS IL17	-35	PepMix SARS-CoV-2 (S-RBD) 70	Conv.	MF9	0
ICS IL17	-35	PepMix SARS-CoV-2 (S-RBD) 70	αCD40.RBD	MF13	0
ICS IL17	-35	PepMix SARS-CoV-2 (S-RBD) 70	Conv.	MF10	0.00136
ICS IL17	-35	PepMix SARS-CoV-2 (S-RBD) 70	αCD40.RBD	MF14	0.01793
ICS IL17	-35	PepMix SARS-CoV-2 (S-RBD) 70	αCD40.RBD	MF15	0
ICS IL17	-35	PepMix SARS-CoV-2 (S-RBD) 70	αCD40.RBD	MF16	0.00418
ICS IL17	-35	PepMix SARS-CoV-2 (S-RBD) 70	Conv.	MF11	0.00176
ICS IL17	-35	PepMix SARS-CoV-2 (S-RBD) 70	αCD40.RBD	MF17	0.00391
ICS IL17	-35	PepMix SARS-CoV-2 (S-RBD) 70	Conv.	MF12	0
ICS IL17	-35	PepMix SARS-CoV-2 (S-RBD) 70	αCD40.RBD	MF18	0
ICS IL17	-35	PepMix SARS-CoV-2 (S-RBD) 70	Naive	MF1	0
ICS IL17	-35	PepMix SARS-CoV-2 (S-RBD) 70	Naive	MF2	0.00415
ICS IL17	-35	PepMix SARS-CoV-2 (S-RBD) 70	Naive	MF3	0.00124
ICS IL17	-35	PepMix SARS-CoV-2 (S-RBD) 70	Naive	MF4	0.00357
ICS IL17	-35	PepMix SARS-CoV-2 (S-RBD) 70	Naive	MF5	0.00728
ICS IL17	-35	PepMix SARS-CoV-2 (S-RBD) 70	Naive	MF6	0.00099
ICS IL17	-14	NS	Conv.	MF7	0.00178
ICS IL17	-14	NS	Conv.	MF8	0.00334
ICS IL17	-14	NS	Conv.	MF9	0
ICS IL17	-14	NS	αCD40.RBD	MF13	0.00096
ICS IL17	-14	NS	Conv.	MF10	0
ICS IL17	-14	NS	αCD40.RBD	MF14	0.00318
ICS IL17	-14	NS	αCD40.RBD	MF15	0.00113
ICS IL17	-14	NS	αCD40.RBD	MF16	0.00391
ICS IL17	-14	NS	Conv.	MF11	0
ICS IL17	-14	NS	αCD40.RBD	MF17	0.00886
ICS IL17	-14	NS	Conv.	MF12	0
ICS IL17	-14	NS	αCD40.RBD	MF18	0
ICS IL17	-14	NS	Naive	MF1	0
ICS IL17	-14	NS	Naive	MF2	0.00231
ICS IL17	-14	NS	Naive	MF3	0
ICS IL17	-14	NS	Naive	MF4	ND
ICS IL17	-14	NS	Naive	MF5	0
ICS IL17	-14	NS	Naive	MF6	0.00119
ICS IL17	-14	PepMix SARS-CoV-2 (S-RBD) 70	Conv.	MF7	0
ICS IL17	-14	PepMix SARS-CoV-2 (S-RBD) 70	Conv.	MF8	0.00393
ICS IL17	-14	PepMix SARS-CoV-2 (S-RBD) 70	Conv.	MF9	0
ICS IL17	-14	PepMix SARS-CoV-2 (S-RBD) 70	αCD40.RBD	MF13	0.00188
ICS IL17	-14	PepMix SARS-CoV-2 (S-RBD) 70	Conv.	MF10	0
ICS IL17	-14	PepMix SARS-CoV-2 (S-RBD) 70	αCD40.RBD	MF14	0.00411
ICS IL17	-14	PepMix SARS-CoV-2 (S-RBD) 70	αCD40.RBD	MF15	0
ICS IL17	-14	PepMix SARS-CoV-2 (S-RBD) 70	αCD40.RBD	MF16	0
ICS IL17	-14	PepMix SARS-CoV-2 (S-RBD) 70	Conv.	MF11	0
ICS IL17	-14	PepMix SARS-CoV-2 (S-RBD) 70	αCD40.RBD	MF17	0.00496
ICS IL17	-14	PepMix SARS-CoV-2 (S-RBD) 70	Conv.	MF12	0
ICS IL17	-14	PepMix SARS-CoV-2 (S-RBD) 70	αCD40.RBD	MF18	0.00651
ICS IL17	-14	PepMix SARS-CoV-2 (S-RBD) 70	Naive	MF1	0
ICS IL17	-14	PepMix SARS-CoV-2 (S-RBD) 70	Naive	MF2	0.01034
ICS IL17	-14	PepMix SARS-CoV-2 (S-RBD) 70	Naive	MF3	0.00242
ICS IL17	-14	PepMix SARS-CoV-2 (S-RBD) 70	Naive	MF4	ND
ICS IL17	-14	PepMix SARS-CoV-2 (S-RBD) 70	Naive	MF5	0.002
ICS IL17	-14	PepMix SARS-CoV-2 (S-RBD) 70	Naive	MF6	0
ICS IL17	9	NS	Conv.	MF7	0.00962
ICS IL17	9	NS	Conv.	MF8	0
ICS IL17	9	NS	Conv.	MF9	0.0013
ICS IL17	9	NS	αCD40.RBD	MF13	0.00136
ICS IL17	9	NS	Conv.	MF10	0.0038
ICS IL17	9	NS	αCD40.RBD	MF14	0.01359
ICS IL17	9	NS	αCD40.RBD	MF15	0.00073
ICS IL17	9	NS	αCD40.RBD	MF16	0.00415
ICS IL17	9	NS	Conv.	MF11	0.0009
ICS IL17	9	NS	αCD40.RBD	MF17	0.01295
ICS IL17	9	NS	Conv.	MF12	0.00579
ICS IL17	9	NS	αCD40.RBD	MF18	0.00129
ICS IL17	9	NS	Naive	MF1	0.00087
ICS IL17	9	NS	Naive	MF2	0.01668
ICS IL17	9	NS	Naive	MF3	0.0017
ICS IL17	9	NS	Naive	MF4	0.00747
ICS IL17	9	NS	Naive	MF5	0.00862
ICS IL17	9	NS	Naive	MF6	0.00077
ICS IL17	9	PepMix SARS-CoV-2 (S-RBD) 70	Conv.	MF7	0
ICS IL17	9	PepMix SARS-CoV-2 (S-RBD) 70	Conv.	MF8	0.0163
ICS IL17	9	PepMix SARS-CoV-2 (S-RBD) 70	Conv.	MF9	0.00276
ICS IL17	9	PepMix SARS-CoV-2 (S-RBD) 70	αCD40.RBD	MF13	0.00151
ICS IL17	9	PepMix SARS-CoV-2 (S-RBD) 70	Conv.	MF10	0.00291
ICS IL17	9	PepMix SARS-CoV-2 (S-RBD) 70	αCD40.RBD	MF14	0.02043
ICS IL17	9	PepMix SARS-CoV-2 (S-RBD) 70	αCD40.RBD	MF15	0.00077
ICS IL17	9	PepMix SARS-CoV-2 (S-RBD) 70	αCD40.RBD	MF16	0.00754
ICS IL17	9	PepMix SARS-CoV-2 (S-RBD) 70	Conv.	MF11	0.00285
ICS IL17	9	PepMix SARS-CoV-2 (S-RBD) 70	αCD40.RBD	MF17	0.00976
ICS IL17	9	PepMix SARS-CoV-2 (S-RBD) 70	Conv.	MF12	0.00448
ICS IL17	9	PepMix SARS-CoV-2 (S-RBD) 70	αCD40.RBD	MF18	0.00318
ICS IL17	9	PepMix SARS-CoV-2 (S-RBD) 70	Naive	MF1	0.0032
ICS IL17	9	PepMix SARS-CoV-2 (S-RBD) 70	Naive	MF2	0.0363
ICS IL17	9	PepMix SARS-CoV-2 (S-RBD) 70	Naive	MF3	0.00567
ICS IL17	9	PepMix SARS-CoV-2 (S-RBD) 70	Naive	MF4	0.00784
ICS IL17	9	PepMix SARS-CoV-2 (S-RBD) 70	Naive	MF5	0.0096
ICS IL17	9	PepMix SARS-CoV-2 (S-RBD) 70	Naive	MF6	0.00231
ICS IL17	20	NS	Conv.	MF7	0.00538
ICS IL17	20	NS	Conv.	MF8	0.00844
ICS IL17	20	NS	Conv.	MF9	0.00104
ICS IL17	20	NS	αCD40.RBD	MF13	0
ICS IL17	20	NS	Conv.	MF10	0
ICS IL17	20	NS	αCD40.RBD	MF14	0.00751
ICS IL17	20	NS	αCD40.RBD	MF15	0.00164
ICS IL17	20	NS	αCD40.RBD	MF16	0.0121
ICS IL17	20	NS	Conv.	MF11	0
ICS IL17	20	NS	αCD40.RBD	MF17	0
ICS IL17	20	NS	Conv.	MF12	0.00121
ICS IL17	20	NS	αCD40.RBD	MF18	0.00687
ICS IL17	20	NS	Naive	MF1	0.0038
ICS IL17	20	NS	Naive	MF2	0.04972
ICS IL17	20	NS	Naive	MF3	0
ICS IL17	20	NS	Naive	MF4	0.00522
ICS IL17	20	NS	Naive	MF5	0.01582
ICS IL17	20	NS	Naive	MF6	0.00156
ICS IL17	20	PepMix SARS-CoV-2 (S-RBD) 70	Conv.	MF7	0.00294
ICS IL17	20	PepMix SARS-CoV-2 (S-RBD) 70	Conv.	MF8	0.03006
ICS IL17	20	PepMix SARS-CoV-2 (S-RBD) 70	Conv.	MF9	0
ICS IL17	20	PepMix SARS-CoV-2 (S-RBD) 70	αCD40.RBD	MF13	0.00073
ICS IL17	20	PepMix SARS-CoV-2 (S-RBD) 70	Conv.	MF10	0.00402
ICS IL17	20	PepMix SARS-CoV-2 (S-RBD) 70	αCD40.RBD	MF14	0.00842
ICS IL17	20	PepMix SARS-CoV-2 (S-RBD) 70	αCD40.RBD	MF15	0.00194
ICS IL17	20	PepMix SARS-CoV-2 (S-RBD) 70	αCD40.RBD	MF16	0.01718
ICS IL17	20	PepMix SARS-CoV-2 (S-RBD) 70	Conv.	MF11	0.0028
ICS IL17	20	PepMix SARS-CoV-2 (S-RBD) 70	αCD40.RBD	MF17	0.00166
ICS IL17	20	PepMix SARS-CoV-2 (S-RBD) 70	Conv.	MF12	0.00282
ICS IL17	20	PepMix SARS-CoV-2 (S-RBD) 70	αCD40.RBD	MF18	0.00572
ICS IL17	20	PepMix SARS-CoV-2 (S-RBD) 70	Naive	MF1	0.00217
ICS IL17	20	PepMix SARS-CoV-2 (S-RBD) 70	Naive	MF2	0.05686
ICS IL17	20	PepMix SARS-CoV-2 (S-RBD) 70	Naive	MF3	0.0023
ICS IL17	20	PepMix SARS-CoV-2 (S-RBD) 70	Naive	MF4	0.00106
ICS IL17	20	PepMix SARS-CoV-2 (S-RBD) 70	Naive	MF5	0.03478
ICS IL17	20	PepMix SARS-CoV-2 (S-RBD) 70	Naive	MF6	0
ICS IL17	-35	PepMix SARS-CoV-2 (N) 102	Conv.	MF7	0
ICS IL17	-35	PepMix SARS-CoV-2 (N) 102	Conv.	MF8	0.01832
ICS IL17	-35	PepMix SARS-CoV-2 (N) 102	Conv.	MF9	0
ICS IL17	-35	PepMix SARS-CoV-2 (N) 102	αCD40.RBD	MF13	0
ICS IL17	-35	PepMix SARS-CoV-2 (N) 102	Conv.	MF10	0.00138
ICS IL17	-35	PepMix SARS-CoV-2 (N) 102	αCD40.RBD	MF14	0.01569
ICS IL17	-35	PepMix SARS-CoV-2 (N) 102	αCD40.RBD	MF15	0
ICS IL17	-35	PepMix SARS-CoV-2 (N) 102	αCD40.RBD	MF16	0.00639
ICS IL17	-35	PepMix SARS-CoV-2 (N) 102	Conv.	MF11	0.00163
ICS IL17	-35	PepMix SARS-CoV-2 (N) 102	αCD40.RBD	MF17	0.00238
ICS IL17	-35	PepMix SARS-CoV-2 (N) 102	Conv.	MF12	0
ICS IL17	-35	PepMix SARS-CoV-2 (N) 102	αCD40.RBD	MF18	0.00154
ICS IL17	-35	PepMix SARS-CoV-2 (N) 102	Naive	MF1	0
ICS IL17	-35	PepMix SARS-CoV-2 (N) 102	Naive	MF2	0.00646
ICS IL17	-35	PepMix SARS-CoV-2 (N) 102	Naive	MF3	0
ICS IL17	-35	PepMix SARS-CoV-2 (N) 102	Naive	MF4	0.00234
ICS IL17	-35	PepMix SARS-CoV-2 (N) 102	Naive	MF5	0.0051
ICS IL17	-35	PepMix SARS-CoV-2 (N) 102	Naive	MF6	0.00431
ICS IL17	-14	PepMix SARS-CoV-2 (N) 102	Conv.	MF7	ND
ICS IL17	-14	PepMix SARS-CoV-2 (N) 102	Conv.	MF8	0.01654
ICS IL17	-14	PepMix SARS-CoV-2 (N) 102	Conv.	MF9	0
ICS IL17	-14	PepMix SARS-CoV-2 (N) 102	αCD40.RBD	MF13	0
ICS IL17	-14	PepMix SARS-CoV-2 (N) 102	Conv.	MF10	0.00327
ICS IL17	-14	PepMix SARS-CoV-2 (N) 102	αCD40.RBD	MF14	0.00357
ICS IL17	-14	PepMix SARS-CoV-2 (N) 102	αCD40.RBD	MF15	0
ICS IL17	-14	PepMix SARS-CoV-2 (N) 102	αCD40.RBD	MF16	ND
ICS IL17	-14	PepMix SARS-CoV-2 (N) 102	Conv.	MF11	0
ICS IL17	-14	PepMix SARS-CoV-2 (N) 102	αCD40.RBD	MF17	0
ICS IL17	-14	PepMix SARS-CoV-2 (N) 102	Conv.	MF12	0
ICS IL17	-14	PepMix SARS-CoV-2 (N) 102	αCD40.RBD	MF18	0.00334
ICS IL17	-14	PepMix SARS-CoV-2 (N) 102	Naive	MF1	0
ICS IL17	-14	PepMix SARS-CoV-2 (N) 102	Naive	MF2	0.00819
ICS IL17	-14	PepMix SARS-CoV-2 (N) 102	Naive	MF3	0
ICS IL17	-14	PepMix SARS-CoV-2 (N) 102	Naive	MF4	ND
ICS IL17	-14	PepMix SARS-CoV-2 (N) 102	Naive	MF5	0.002
ICS IL17	-14	PepMix SARS-CoV-2 (N) 102	Naive	MF6	0.00112
ICS IL17	9	PepMix SARS-CoV-2 (N) 102	Conv.	MF7	0.0048
ICS IL17	9	PepMix SARS-CoV-2 (N) 102	Conv.	MF8	0.01082
ICS IL17	9	PepMix SARS-CoV-2 (N) 102	Conv.	MF9	0.01019
ICS IL17	9	PepMix SARS-CoV-2 (N) 102	αCD40.RBD	MF13	0.00689
ICS IL17	9	PepMix SARS-CoV-2 (N) 102	Conv.	MF10	0.01069
ICS IL17	9	PepMix SARS-CoV-2 (N) 102	αCD40.RBD	MF14	0.03524
ICS IL17	9	PepMix SARS-CoV-2 (N) 102	αCD40.RBD	MF15	0.01433
ICS IL17	9	PepMix SARS-CoV-2 (N) 102	αCD40.RBD	MF16	0.00754
ICS IL17	9	PepMix SARS-CoV-2 (N) 102	Conv.	MF11	0.00677
ICS IL17	9	PepMix SARS-CoV-2 (N) 102	αCD40.RBD	MF17	0.01982
ICS IL17	9	PepMix SARS-CoV-2 (N) 102	Conv.	MF12	0.01666
ICS IL17	9	PepMix SARS-CoV-2 (N) 102	αCD40.RBD	MF18	0.00853
ICS IL17	9	PepMix SARS-CoV-2 (N) 102	Naive	MF1	0.01408
ICS IL17	9	PepMix SARS-CoV-2 (N) 102	Naive	MF2	0.05277
ICS IL17	9	PepMix SARS-CoV-2 (N) 102	Naive	MF3	0.02418
ICS IL17	9	PepMix SARS-CoV-2 (N) 102	Naive	MF4	0.0103
ICS IL17	9	PepMix SARS-CoV-2 (N) 102	Naive	MF5	0.02115
ICS IL17	9	PepMix SARS-CoV-2 (N) 102	Naive	MF6	0.00759
ICS IL17	20	PepMix SARS-CoV-2 (N) 102	Conv.	MF7	0.0048
ICS IL17	20	PepMix SARS-CoV-2 (N) 102	Conv.	MF8	0.01082
ICS IL17	20	PepMix SARS-CoV-2 (N) 102	Conv.	MF9	0.01019
ICS IL17	20	PepMix SARS-CoV-2 (N) 102	αCD40.RBD	MF13	0.00689
ICS IL17	20	PepMix SARS-CoV-2 (N) 102	Conv.	MF10	0.01069
ICS IL17	20	PepMix SARS-CoV-2 (N) 102	αCD40.RBD	MF14	0.03524
ICS IL17	20	PepMix SARS-CoV-2 (N) 102	αCD40.RBD	MF15	0.01433
ICS IL17	20	PepMix SARS-CoV-2 (N) 102	αCD40.RBD	MF16	0.00754
ICS IL17	20	PepMix SARS-CoV-2 (N) 102	Conv.	MF11	0.00677
ICS IL17	20	PepMix SARS-CoV-2 (N) 102	αCD40.RBD	MF17	0.01982
ICS IL17	20	PepMix SARS-CoV-2 (N) 102	Conv.	MF12	0.01666
ICS IL17	20	PepMix SARS-CoV-2 (N) 102	αCD40.RBD	MF18	0.00853
ICS IL17	20	PepMix SARS-CoV-2 (N) 102	Naive	MF1	0.01408
ICS IL17	20	PepMix SARS-CoV-2 (N) 102	Naive	MF2	0.05277
ICS IL17	20	PepMix SARS-CoV-2 (N) 102	Naive	MF3	0.02418
ICS IL17	20	PepMix SARS-CoV-2 (N) 102	Naive	MF4	0.0103
ICS IL17	20	PepMix SARS-CoV-2 (N) 102	Naive	MF5	0.02115
ICS IL17	20	PepMix SARS-CoV-2 (N) 102	Naive	MF6	0.00759
ICS IL13	-35	NS	Conv.	MF7	0
ICS IL13	-35	NS	Conv.	MF8	0
ICS IL13	-35	NS	Conv.	MF9	0
ICS IL13	-35	NS	αCD40.RBD	MF13	0
ICS IL13	-35	NS	Conv.	MF10	0
ICS IL13	-35	NS	αCD40.RBD	MF14	0
ICS IL13	-35	NS	αCD40.RBD	MF15	0.0044
ICS IL13	-35	NS	αCD40.RBD	MF16	0
ICS IL13	-35	NS	Conv.	MF11	0
ICS IL13	-35	NS	αCD40.RBD	MF17	0
ICS IL13	-35	NS	Conv.	MF12	0
ICS IL13	-35	NS	αCD40.RBD	MF18	0
ICS IL13	-35	NS	Naive	MF1	0
ICS IL13	-35	NS	Naive	MF2	0
ICS IL13	-35	NS	Naive	MF3	0
ICS IL13	-35	NS	Naive	MF4	0
ICS IL13	-35	NS	Naive	MF5	0
ICS IL13	-35	NS	Naive	MF6	0
ICS IL13	-35	PepMix SARS-CoV-2 (S-RBD) 70	Conv.	MF7	0
ICS IL13	-35	PepMix SARS-CoV-2 (S-RBD) 70	Conv.	MF8	0
ICS IL13	-35	PepMix SARS-CoV-2 (S-RBD) 70	Conv.	MF9	0
ICS IL13	-35	PepMix SARS-CoV-2 (S-RBD) 70	αCD40.RBD	MF13	0
ICS IL13	-35	PepMix SARS-CoV-2 (S-RBD) 70	Conv.	MF10	0
ICS IL13	-35	PepMix SARS-CoV-2 (S-RBD) 70	αCD40.RBD	MF14	0.00085
ICS IL13	-35	PepMix SARS-CoV-2 (S-RBD) 70	αCD40.RBD	MF15	0.00087
ICS IL13	-35	PepMix SARS-CoV-2 (S-RBD) 70	αCD40.RBD	MF16	0
ICS IL13	-35	PepMix SARS-CoV-2 (S-RBD) 70	Conv.	MF11	0.00176
ICS IL13	-35	PepMix SARS-CoV-2 (S-RBD) 70	αCD40.RBD	MF17	0
ICS IL13	-35	PepMix SARS-CoV-2 (S-RBD) 70	Conv.	MF12	0
ICS IL13	-35	PepMix SARS-CoV-2 (S-RBD) 70	αCD40.RBD	MF18	0
ICS IL13	-35	PepMix SARS-CoV-2 (S-RBD) 70	Naive	MF1	0
ICS IL13	-35	PepMix SARS-CoV-2 (S-RBD) 70	Naive	MF2	0.00414
ICS IL13	-35	PepMix SARS-CoV-2 (S-RBD) 70	Naive	MF3	0
ICS IL13	-35	PepMix SARS-CoV-2 (S-RBD) 70	Naive	MF4	0
ICS IL13	-35	PepMix SARS-CoV-2 (S-RBD) 70	Naive	MF5	0.00091
ICS IL13	-35	PepMix SARS-CoV-2 (S-RBD) 70	Naive	MF6	0
ICS IL13	-14	NS	Conv.	MF7	0.00178
ICS IL13	-14	NS	Conv.	MF8	0
ICS IL13	-14	NS	Conv.	MF9	0
ICS IL13	-14	NS	αCD40.RBD	MF13	0
ICS IL13	-14	NS	Conv.	MF10	0
ICS IL13	-14	NS	αCD40.RBD	MF14	0
ICS IL13	-14	NS	αCD40.RBD	MF15	0.00113
ICS IL13	-14	NS	αCD40.RBD	MF16	0
ICS IL13	-14	NS	Conv.	MF11	0.00131
ICS IL13	-14	NS	αCD40.RBD	MF17	0
ICS IL13	-14	NS	Conv.	MF12	0
ICS IL13	-14	NS	αCD40.RBD	MF18	0
ICS IL13	-14	NS	Naive	MF1	0
ICS IL13	-14	NS	Naive	MF2	0
ICS IL13	-14	NS	Naive	MF3	0
ICS IL13	-14	NS	Naive	MF4	ND
ICS IL13	-14	NS	Naive	MF5	0
ICS IL13	-14	NS	Naive	MF6	0
ICS IL13	-14	PepMix SARS-CoV-2 (S-RBD) 70	Conv.	MF7	0
ICS IL13	-14	PepMix SARS-CoV-2 (S-RBD) 70	Conv.	MF8	0
ICS IL13	-14	PepMix SARS-CoV-2 (S-RBD) 70	Conv.	MF9	0
ICS IL13	-14	PepMix SARS-CoV-2 (S-RBD) 70	αCD40.RBD	MF13	0.00188
ICS IL13	-14	PepMix SARS-CoV-2 (S-RBD) 70	Conv.	MF10	0
ICS IL13	-14	PepMix SARS-CoV-2 (S-RBD) 70	αCD40.RBD	MF14	0.00137
ICS IL13	-14	PepMix SARS-CoV-2 (S-RBD) 70	αCD40.RBD	MF15	0
ICS IL13	-14	PepMix SARS-CoV-2 (S-RBD) 70	αCD40.RBD	MF16	0
ICS IL13	-14	PepMix SARS-CoV-2 (S-RBD) 70	Conv.	MF11	0
ICS IL13	-14	PepMix SARS-CoV-2 (S-RBD) 70	αCD40.RBD	MF17	0
ICS IL13	-14	PepMix SARS-CoV-2 (S-RBD) 70	Conv.	MF12	0
ICS IL13	-14	PepMix SARS-CoV-2 (S-RBD) 70	αCD40.RBD	MF18	0
ICS IL13	-14	PepMix SARS-CoV-2 (S-RBD) 70	Naive	MF1	0
ICS IL13	-14	PepMix SARS-CoV-2 (S-RBD) 70	Naive	MF2	0
ICS IL13	-14	PepMix SARS-CoV-2 (S-RBD) 70	Naive	MF3	0.00121
ICS IL13	-14	PepMix SARS-CoV-2 (S-RBD) 70	Naive	MF4	ND
ICS IL13	-14	PepMix SARS-CoV-2 (S-RBD) 70	Naive	MF5	0
ICS IL13	-14	PepMix SARS-CoV-2 (S-RBD) 70	Naive	MF6	0
ICS IL13	9	NS	Conv.	MF7	0
ICS IL13	9	NS	Conv.	MF8	0
ICS IL13	9	NS	Conv.	MF9	0.0026
ICS IL13	9	NS	αCD40.RBD	MF13	0.00136
ICS IL13	9	NS	Conv.	MF10	0.0019
ICS IL13	9	NS	αCD40.RBD	MF14	0
ICS IL13	9	NS	αCD40.RBD	MF15	0.00073
ICS IL13	9	NS	αCD40.RBD	MF16	0.00415
ICS IL13	9	NS	Conv.	MF11	0
ICS IL13	9	NS	αCD40.RBD	MF17	0
ICS IL13	9	NS	Conv.	MF12	0
ICS IL13	9	NS	αCD40.RBD	MF18	0
ICS IL13	9	NS	Naive	MF1	0
ICS IL13	9	NS	Naive	MF2	0
ICS IL13	9	NS	Naive	MF3	0
ICS IL13	9	NS	Naive	MF4	0
ICS IL13	9	NS	Naive	MF5	0.00246
ICS IL13	9	NS	Naive	MF6	0
ICS IL13	9	PepMix SARS-CoV-2 (S-RBD) 70	Conv.	MF7	0
ICS IL13	9	PepMix SARS-CoV-2 (S-RBD) 70	Conv.	MF8	0
ICS IL13	9	PepMix SARS-CoV-2 (S-RBD) 70	Conv.	MF9	0
ICS IL13	9	PepMix SARS-CoV-2 (S-RBD) 70	αCD40.RBD	MF13	0
ICS IL13	9	PepMix SARS-CoV-2 (S-RBD) 70	Conv.	MF10	0
ICS IL13	9	PepMix SARS-CoV-2 (S-RBD) 70	αCD40.RBD	MF14	0
ICS IL13	9	PepMix SARS-CoV-2 (S-RBD) 70	αCD40.RBD	MF15	0
ICS IL13	9	PepMix SARS-CoV-2 (S-RBD) 70	αCD40.RBD	MF16	0.00377
ICS IL13	9	PepMix SARS-CoV-2 (S-RBD) 70	Conv.	MF11	0
ICS IL13	9	PepMix SARS-CoV-2 (S-RBD) 70	αCD40.RBD	MF17	0.00195
ICS IL13	9	PepMix SARS-CoV-2 (S-RBD) 70	Conv.	MF12	0
ICS IL13	9	PepMix SARS-CoV-2 (S-RBD) 70	αCD40.RBD	MF18	0
ICS IL13	9	PepMix SARS-CoV-2 (S-RBD) 70	Naive	MF1	0.0008
ICS IL13	9	PepMix SARS-CoV-2 (S-RBD) 70	Naive	MF2	0.00726
ICS IL13	9	PepMix SARS-CoV-2 (S-RBD) 70	Naive	MF3	0
ICS IL13	9	PepMix SARS-CoV-2 (S-RBD) 70	Naive	MF4	0
ICS IL13	9	PepMix SARS-CoV-2 (S-RBD) 70	Naive	MF5	0.0012
ICS IL13	9	PepMix SARS-CoV-2 (S-RBD) 70	Naive	MF6	0.00077
ICS IL13	20	NS	Conv.	MF7	0
ICS IL13	20	NS	Conv.	MF8	0
ICS IL13	20	NS	Conv.	MF9	0
ICS IL13	20	NS	αCD40.RBD	MF13	0
ICS IL13	20	NS	Conv.	MF10	0
ICS IL13	20	NS	αCD40.RBD	MF14	0
ICS IL13	20	NS	αCD40.RBD	MF15	0.00082
ICS IL13	20	NS	αCD40.RBD	MF16	0.00242
ICS IL13	20	NS	Conv.	MF11	0
ICS IL13	20	NS	αCD40.RBD	MF17	0
ICS IL13	20	NS	Conv.	MF12	0
ICS IL13	20	NS	αCD40.RBD	MF18	0
ICS IL13	20	NS	Naive	MF1	0
ICS IL13	20	NS	Naive	MF2	0
ICS IL13	20	NS	Naive	MF3	0
ICS IL13	20	NS	Naive	MF4	0
ICS IL13	20	NS	Naive	MF5	0
ICS IL13	20	NS	Naive	MF6	0
ICS IL13	20	PepMix SARS-CoV-2 (S-RBD) 70	Conv.	MF7	0
ICS IL13	20	PepMix SARS-CoV-2 (S-RBD) 70	Conv.	MF8	0
ICS IL13	20	PepMix SARS-CoV-2 (S-RBD) 70	Conv.	MF9	0
ICS IL13	20	PepMix SARS-CoV-2 (S-RBD) 70	αCD40.RBD	MF13	0.00073
ICS IL13	20	PepMix SARS-CoV-2 (S-RBD) 70	Conv.	MF10	0
ICS IL13	20	PepMix SARS-CoV-2 (S-RBD) 70	αCD40.RBD	MF14	0
ICS IL13	20	PepMix SARS-CoV-2 (S-RBD) 70	αCD40.RBD	MF15	0
ICS IL13	20	PepMix SARS-CoV-2 (S-RBD) 70	αCD40.RBD	MF16	0.00245
ICS IL13	20	PepMix SARS-CoV-2 (S-RBD) 70	Conv.	MF11	0
ICS IL13	20	PepMix SARS-CoV-2 (S-RBD) 70	αCD40.RBD	MF17	0
ICS IL13	20	PepMix SARS-CoV-2 (S-RBD) 70	Conv.	MF12	0
ICS IL13	20	PepMix SARS-CoV-2 (S-RBD) 70	αCD40.RBD	MF18	0
ICS IL13	20	PepMix SARS-CoV-2 (S-RBD) 70	Naive	MF1	0
ICS IL13	20	PepMix SARS-CoV-2 (S-RBD) 70	Naive	MF2	0
ICS IL13	20	PepMix SARS-CoV-2 (S-RBD) 70	Naive	MF3	0.0023
ICS IL13	20	PepMix SARS-CoV-2 (S-RBD) 70	Naive	MF4	0
ICS IL13	20	PepMix SARS-CoV-2 (S-RBD) 70	Naive	MF5	0
ICS IL13	20	PepMix SARS-CoV-2 (S-RBD) 70	Naive	MF6	0
ICS IL13	-35	PepMix SARS-CoV-2 (N) 102	Conv.	MF7	0
ICS IL13	-35	PepMix SARS-CoV-2 (N) 102	Conv.	MF8	0
ICS IL13	-35	PepMix SARS-CoV-2 (N) 102	Conv.	MF9	0
ICS IL13	-35	PepMix SARS-CoV-2 (N) 102	αCD40.RBD	MF13	0
ICS IL13	-35	PepMix SARS-CoV-2 (N) 102	Conv.	MF10	0.00138
ICS IL13	-35	PepMix SARS-CoV-2 (N) 102	αCD40.RBD	MF14	0.00083
ICS IL13	-35	PepMix SARS-CoV-2 (N) 102	αCD40.RBD	MF15	0
ICS IL13	-35	PepMix SARS-CoV-2 (N) 102	αCD40.RBD	MF16	0
ICS IL13	-35	PepMix SARS-CoV-2 (N) 102	Conv.	MF11	0
ICS IL13	-35	PepMix SARS-CoV-2 (N) 102	αCD40.RBD	MF17	0
ICS IL13	-35	PepMix SARS-CoV-2 (N) 102	Conv.	MF12	0
ICS IL13	-35	PepMix SARS-CoV-2 (N) 102	αCD40.RBD	MF18	0
ICS IL13	-35	PepMix SARS-CoV-2 (N) 102	Naive	MF1	0
ICS IL13	-35	PepMix SARS-CoV-2 (N) 102	Naive	MF2	0
ICS IL13	-35	PepMix SARS-CoV-2 (N) 102	Naive	MF3	0
ICS IL13	-35	PepMix SARS-CoV-2 (N) 102	Naive	MF4	0.00117
ICS IL13	-35	PepMix SARS-CoV-2 (N) 102	Naive	MF5	0
ICS IL13	-35	PepMix SARS-CoV-2 (N) 102	Naive	MF6	0
ICS IL13	-14	PepMix SARS-CoV-2 (N) 102	Conv.	MF7	ND
ICS IL13	-14	PepMix SARS-CoV-2 (N) 102	Conv.	MF8	0
ICS IL13	-14	PepMix SARS-CoV-2 (N) 102	Conv.	MF9	0
ICS IL13	-14	PepMix SARS-CoV-2 (N) 102	αCD40.RBD	MF13	0
ICS IL13	-14	PepMix SARS-CoV-2 (N) 102	Conv.	MF10	0
ICS IL13	-14	PepMix SARS-CoV-2 (N) 102	αCD40.RBD	MF14	0
ICS IL13	-14	PepMix SARS-CoV-2 (N) 102	αCD40.RBD	MF15	0
ICS IL13	-14	PepMix SARS-CoV-2 (N) 102	αCD40.RBD	MF16	ND
ICS IL13	-14	PepMix SARS-CoV-2 (N) 102	Conv.	MF11	0
ICS IL13	-14	PepMix SARS-CoV-2 (N) 102	αCD40.RBD	MF17	0
ICS IL13	-14	PepMix SARS-CoV-2 (N) 102	Conv.	MF12	0.00087
ICS IL13	-14	PepMix SARS-CoV-2 (N) 102	αCD40.RBD	MF18	0
ICS IL13	-14	PepMix SARS-CoV-2 (N) 102	Naive	MF1	0
ICS IL13	-14	PepMix SARS-CoV-2 (N) 102	Naive	MF2	0
ICS IL13	-14	PepMix SARS-CoV-2 (N) 102	Naive	MF3	0
ICS IL13	-14	PepMix SARS-CoV-2 (N) 102	Naive	MF4	ND
ICS IL13	-14	PepMix SARS-CoV-2 (N) 102	Naive	MF5	0
ICS IL13	-14	PepMix SARS-CoV-2 (N) 102	Naive	MF6	0
ICS IL13	9	PepMix SARS-CoV-2 (N) 102	Conv.	MF7	0
ICS IL13	9	PepMix SARS-CoV-2 (N) 102	Conv.	MF8	0
ICS IL13	9	PepMix SARS-CoV-2 (N) 102	Conv.	MF9	0
ICS IL13	9	PepMix SARS-CoV-2 (N) 102	αCD40.RBD	MF13	0
ICS IL13	9	PepMix SARS-CoV-2 (N) 102	Conv.	MF10	0.00291
ICS IL13	9	PepMix SARS-CoV-2 (N) 102	αCD40.RBD	MF14	0.00294
ICS IL13	9	PepMix SARS-CoV-2 (N) 102	αCD40.RBD	MF15	0
ICS IL13	9	PepMix SARS-CoV-2 (N) 102	αCD40.RBD	MF16	0.00377
ICS IL13	9	PepMix SARS-CoV-2 (N) 102	Conv.	MF11	0.00113
ICS IL13	9	PepMix SARS-CoV-2 (N) 102	αCD40.RBD	MF17	0
ICS IL13	9	PepMix SARS-CoV-2 (N) 102	Conv.	MF12	0
ICS IL13	9	PepMix SARS-CoV-2 (N) 102	αCD40.RBD	MF18	0
ICS IL13	9	PepMix SARS-CoV-2 (N) 102	Naive	MF1	0.00083
ICS IL13	9	PepMix SARS-CoV-2 (N) 102	Naive	MF2	0
ICS IL13	9	PepMix SARS-CoV-2 (N) 102	Naive	MF3	0
ICS IL13	9	PepMix SARS-CoV-2 (N) 102	Naive	MF4	0.00258
ICS IL13	9	PepMix SARS-CoV-2 (N) 102	Naive	MF5	0.00372
ICS IL13	9	PepMix SARS-CoV-2 (N) 102	Naive	MF6	0
ICS IL13	20	PepMix SARS-CoV-2 (N) 102	Conv.	MF7	0.00269
ICS IL13	20	PepMix SARS-CoV-2 (N) 102	Conv.	MF8	0
ICS IL13	20	PepMix SARS-CoV-2 (N) 102	Conv.	MF9	0
ICS IL13	20	PepMix SARS-CoV-2 (N) 102	αCD40.RBD	MF13	0
ICS IL13	20	PepMix SARS-CoV-2 (N) 102	Conv.	MF10	0
ICS IL13	20	PepMix SARS-CoV-2 (N) 102	αCD40.RBD	MF14	0.00139
ICS IL13	20	PepMix SARS-CoV-2 (N) 102	αCD40.RBD	MF15	0
ICS IL13	20	PepMix SARS-CoV-2 (N) 102	αCD40.RBD	MF16	0
ICS IL13	20	PepMix SARS-CoV-2 (N) 102	Conv.	MF11	0.00136
ICS IL13	20	PepMix SARS-CoV-2 (N) 102	αCD40.RBD	MF17	0
ICS IL13	20	PepMix SARS-CoV-2 (N) 102	Conv.	MF12	0
ICS IL13	20	PepMix SARS-CoV-2 (N) 102	αCD40.RBD	MF18	0.00099
ICS IL13	20	PepMix SARS-CoV-2 (N) 102	Naive	MF1	0
ICS IL13	20	PepMix SARS-CoV-2 (N) 102	Naive	MF2	0.00397
ICS IL13	20	PepMix SARS-CoV-2 (N) 102	Naive	MF3	0
ICS IL13	20	PepMix SARS-CoV-2 (N) 102	Naive	MF4	0
ICS IL13	20	PepMix SARS-CoV-2 (N) 102	Naive	MF5	0.00112
ICS IL13	20	PepMix SARS-CoV-2 (N) 102	Naive	MF6	0
