# Supplementary material for: Modelling the response to vaccine in non-human primates to define SARS-CoV-2 mechanistic correlates of protection
Source: eLife. 2022 Jul 8;11:e75427. doi: 10.7554/eLife.75427 (PMC9282856; doi:10.7554/eLife.75427)
Supplement: Figure 1—source data 8. [file elife-75427-fig1-data8.xlsx]

## Sheet: Feuil1
Figure 1 - figure supplement 4B
Study [Marlin, 2021]
Assay	Day post exposure	Stimulation	Group	Animal ID	Value (% of CD8 T cells)
ICS IL2	-35	NS	Conv.	MF7	0
ICS IL2	-35	NS	Conv.	MF8	0.0073
ICS IL2	-35	NS	Conv.	MF9	0.0117
ICS IL2	-35	NS	αCD40.RBD	MF13	0.0137
ICS IL2	-35	NS	Conv.	MF10	0.0062
ICS IL2	-35	NS	αCD40.RBD	MF14	0.01
ICS IL2	-35	NS	αCD40.RBD	MF15	0.0086
ICS IL2	-35	NS	αCD40.RBD	MF16	0.0047
ICS IL2	-35	NS	Conv.	MF11	0.0261
ICS IL2	-35	NS	αCD40.RBD	MF17	0.0135
ICS IL2	-35	NS	Conv.	MF12	0.0106
ICS IL2	-35	NS	αCD40.RBD	MF18	0.0079
ICS IL2	-35	NS	Naive	MF1	0.0016
ICS IL2	-35	NS	Naive	MF2	0.0226
ICS IL2	-35	NS	Naive	MF3	0.0144
ICS IL2	-35	NS	Naive	MF4	0
ICS IL2	-35	NS	Naive	MF5	0.012
ICS IL2	-35	NS	Naive	MF6	0.0099
ICS IL2	-35	PepMix SARS-CoV-2 (S-RBD) 70	Conv.	MF7	0.0278
ICS IL2	-35	PepMix SARS-CoV-2 (S-RBD) 70	Conv.	MF8	0.0101
ICS IL2	-35	PepMix SARS-CoV-2 (S-RBD) 70	Conv.	MF9	0.0018
ICS IL2	-35	PepMix SARS-CoV-2 (S-RBD) 70	αCD40.RBD	MF13	0.0055
ICS IL2	-35	PepMix SARS-CoV-2 (S-RBD) 70	Conv.	MF10	0.007
ICS IL2	-35	PepMix SARS-CoV-2 (S-RBD) 70	αCD40.RBD	MF14	0.0056
ICS IL2	-35	PepMix SARS-CoV-2 (S-RBD) 70	αCD40.RBD	MF15	0.0036
ICS IL2	-35	PepMix SARS-CoV-2 (S-RBD) 70	αCD40.RBD	MF16	0.0062
ICS IL2	-35	PepMix SARS-CoV-2 (S-RBD) 70	Conv.	MF11	0.018
ICS IL2	-35	PepMix SARS-CoV-2 (S-RBD) 70	αCD40.RBD	MF17	0.0077
ICS IL2	-35	PepMix SARS-CoV-2 (S-RBD) 70	Conv.	MF12	0.0042
ICS IL2	-35	PepMix SARS-CoV-2 (S-RBD) 70	αCD40.RBD	MF18	0.003
ICS IL2	-35	PepMix SARS-CoV-2 (S-RBD) 70	Naive	MF1	0.0015
ICS IL2	-35	PepMix SARS-CoV-2 (S-RBD) 70	Naive	MF2	0.0072
ICS IL2	-35	PepMix SARS-CoV-2 (S-RBD) 70	Naive	MF3	0.0066
ICS IL2	-35	PepMix SARS-CoV-2 (S-RBD) 70	Naive	MF4	0
ICS IL2	-35	PepMix SARS-CoV-2 (S-RBD) 70	Naive	MF5	0.0074
ICS IL2	-35	PepMix SARS-CoV-2 (S-RBD) 70	Naive	MF6	0.0149
ICS IL2	-14	NS	Conv.	MF7	0.0035
ICS IL2	-14	NS	Conv.	MF8	0.011
ICS IL2	-14	NS	Conv.	MF9	0.0098
ICS IL2	-14	NS	αCD40.RBD	MF13	0.008
ICS IL2	-14	NS	Conv.	MF10	0.0054
ICS IL2	-14	NS	αCD40.RBD	MF14	0.0102
ICS IL2	-14	NS	αCD40.RBD	MF15	0.0019
ICS IL2	-14	NS	αCD40.RBD	MF16	0.0098
ICS IL2	-14	NS	Conv.	MF11	0.0092
ICS IL2	-14	NS	αCD40.RBD	MF17	0.0158
ICS IL2	-14	NS	Conv.	MF12	0.0102
ICS IL2	-14	NS	αCD40.RBD	MF18	0.0027
ICS IL2	-14	NS	Naive	MF1	0.0047
ICS IL2	-14	NS	Naive	MF2	0.0146
ICS IL2	-14	NS	Naive	MF3	0.0064
ICS IL2	-14	NS	Naive	MF4	ND
ICS IL2	-14	NS	Naive	MF5	0.0036
ICS IL2	-14	NS	Naive	MF6	0.0274
ICS IL2	-14	PepMix SARS-CoV-2 (S-RBD) 70	Conv.	MF7	0.0105
ICS IL2	-14	PepMix SARS-CoV-2 (S-RBD) 70	Conv.	MF8	0
ICS IL2	-14	PepMix SARS-CoV-2 (S-RBD) 70	Conv.	MF9	0.0024
ICS IL2	-14	PepMix SARS-CoV-2 (S-RBD) 70	αCD40.RBD	MF13	0.0069
ICS IL2	-14	PepMix SARS-CoV-2 (S-RBD) 70	Conv.	MF10	0.0095
ICS IL2	-14	PepMix SARS-CoV-2 (S-RBD) 70	αCD40.RBD	MF14	0.0216
ICS IL2	-14	PepMix SARS-CoV-2 (S-RBD) 70	αCD40.RBD	MF15	0.0025
ICS IL2	-14	PepMix SARS-CoV-2 (S-RBD) 70	αCD40.RBD	MF16	0.0035
ICS IL2	-14	PepMix SARS-CoV-2 (S-RBD) 70	Conv.	MF11	0.0075
ICS IL2	-14	PepMix SARS-CoV-2 (S-RBD) 70	αCD40.RBD	MF17	0.0081
ICS IL2	-14	PepMix SARS-CoV-2 (S-RBD) 70	Conv.	MF12	0.0077
ICS IL2	-14	PepMix SARS-CoV-2 (S-RBD) 70	αCD40.RBD	MF18	0.017
ICS IL2	-14	PepMix SARS-CoV-2 (S-RBD) 70	Naive	MF1	0.0076
ICS IL2	-14	PepMix SARS-CoV-2 (S-RBD) 70	Naive	MF2	0
ICS IL2	-14	PepMix SARS-CoV-2 (S-RBD) 70	Naive	MF3	0.0142
ICS IL2	-14	PepMix SARS-CoV-2 (S-RBD) 70	Naive	MF4	ND
ICS IL2	-14	PepMix SARS-CoV-2 (S-RBD) 70	Naive	MF5	0.0035
ICS IL2	-14	PepMix SARS-CoV-2 (S-RBD) 70	Naive	MF6	0.0177
ICS IL2	9	NS	Conv.	MF7	0.0215
ICS IL2	9	NS	Conv.	MF8	0.0101
ICS IL2	9	NS	Conv.	MF9	0.0077
ICS IL2	9	NS	αCD40.RBD	MF13	0.0144
ICS IL2	9	NS	Conv.	MF10	0.0113
ICS IL2	9	NS	αCD40.RBD	MF14	0.0139
ICS IL2	9	NS	αCD40.RBD	MF15	0.0069
ICS IL2	9	NS	αCD40.RBD	MF16	0.0054
ICS IL2	9	NS	Conv.	MF11	0.016
ICS IL2	9	NS	αCD40.RBD	MF17	0.0412
ICS IL2	9	NS	Conv.	MF12	0
ICS IL2	9	NS	αCD40.RBD	MF18	0.0134
ICS IL2	9	NS	Naive	MF1	0.0062
ICS IL2	9	NS	Naive	MF2	0.0226
ICS IL2	9	NS	Naive	MF3	0.0274
ICS IL2	9	NS	Naive	MF4	0.0072
ICS IL2	9	NS	Naive	MF5	0.0204
ICS IL2	9	NS	Naive	MF6	0.0035
ICS IL2	9	PepMix SARS-CoV-2 (S-RBD) 70	Conv.	MF7	0.0257
ICS IL2	9	PepMix SARS-CoV-2 (S-RBD) 70	Conv.	MF8	0.0208
ICS IL2	9	PepMix SARS-CoV-2 (S-RBD) 70	Conv.	MF9	0.0154
ICS IL2	9	PepMix SARS-CoV-2 (S-RBD) 70	αCD40.RBD	MF13	0.01
ICS IL2	9	PepMix SARS-CoV-2 (S-RBD) 70	Conv.	MF10	0.0134
ICS IL2	9	PepMix SARS-CoV-2 (S-RBD) 70	αCD40.RBD	MF14	0.0108
ICS IL2	9	PepMix SARS-CoV-2 (S-RBD) 70	αCD40.RBD	MF15	0
ICS IL2	9	PepMix SARS-CoV-2 (S-RBD) 70	αCD40.RBD	MF16	0.0532
ICS IL2	9	PepMix SARS-CoV-2 (S-RBD) 70	Conv.	MF11	0.0176
ICS IL2	9	PepMix SARS-CoV-2 (S-RBD) 70	αCD40.RBD	MF17	0.021
ICS IL2	9	PepMix SARS-CoV-2 (S-RBD) 70	Conv.	MF12	0.0112
ICS IL2	9	PepMix SARS-CoV-2 (S-RBD) 70	αCD40.RBD	MF18	0.0064
ICS IL2	9	PepMix SARS-CoV-2 (S-RBD) 70	Naive	MF1	0.0098
ICS IL2	9	PepMix SARS-CoV-2 (S-RBD) 70	Naive	MF2	0.0178
ICS IL2	9	PepMix SARS-CoV-2 (S-RBD) 70	Naive	MF3	0.0189
ICS IL2	9	PepMix SARS-CoV-2 (S-RBD) 70	Naive	MF4	0.0084
ICS IL2	9	PepMix SARS-CoV-2 (S-RBD) 70	Naive	MF5	0.0125
ICS IL2	9	PepMix SARS-CoV-2 (S-RBD) 70	Naive	MF6	0.022
ICS IL2	20	NS	Conv.	MF7	0.0799
ICS IL2	20	NS	Conv.	MF8	0.0258
ICS IL2	20	NS	Conv.	MF9	0.0077
ICS IL2	20	NS	αCD40.RBD	MF13	0.0177
ICS IL2	20	NS	Conv.	MF10	0.0408
ICS IL2	20	NS	αCD40.RBD	MF14	0.0396
ICS IL2	20	NS	αCD40.RBD	MF15	0.0027
ICS IL2	20	NS	αCD40.RBD	MF16	0.0229
ICS IL2	20	NS	Conv.	MF11	0.0607
ICS IL2	20	NS	αCD40.RBD	MF17	0.034
ICS IL2	20	NS	Conv.	MF12	0.022
ICS IL2	20	NS	αCD40.RBD	MF18	0.002
ICS IL2	20	NS	Naive	MF1	0.0048
ICS IL2	20	NS	Naive	MF2	0.0414
ICS IL2	20	NS	Naive	MF3	0.1694
ICS IL2	20	NS	Naive	MF4	0.0046
ICS IL2	20	NS	Naive	MF5	0
ICS IL2	20	NS	Naive	MF6	0.0169
ICS IL2	20	PepMix SARS-CoV-2 (S-RBD) 70	Conv.	MF7	0.0836
ICS IL2	20	PepMix SARS-CoV-2 (S-RBD) 70	Conv.	MF8	0.0054
ICS IL2	20	PepMix SARS-CoV-2 (S-RBD) 70	Conv.	MF9	0.0171
ICS IL2	20	PepMix SARS-CoV-2 (S-RBD) 70	αCD40.RBD	MF13	0.0415
ICS IL2	20	PepMix SARS-CoV-2 (S-RBD) 70	Conv.	MF10	0.0308
ICS IL2	20	PepMix SARS-CoV-2 (S-RBD) 70	αCD40.RBD	MF14	0.0733
ICS IL2	20	PepMix SARS-CoV-2 (S-RBD) 70	αCD40.RBD	MF15	0.0066
ICS IL2	20	PepMix SARS-CoV-2 (S-RBD) 70	αCD40.RBD	MF16	0.0107
ICS IL2	20	PepMix SARS-CoV-2 (S-RBD) 70	Conv.	MF11	0.0146
ICS IL2	20	PepMix SARS-CoV-2 (S-RBD) 70	αCD40.RBD	MF17	0.0255
ICS IL2	20	PepMix SARS-CoV-2 (S-RBD) 70	Conv.	MF12	0.0065
ICS IL2	20	PepMix SARS-CoV-2 (S-RBD) 70	αCD40.RBD	MF18	0.007
ICS IL2	20	PepMix SARS-CoV-2 (S-RBD) 70	Naive	MF1	0.0029
ICS IL2	20	PepMix SARS-CoV-2 (S-RBD) 70	Naive	MF2	0.0298
ICS IL2	20	PepMix SARS-CoV-2 (S-RBD) 70	Naive	MF3	0.036
ICS IL2	20	PepMix SARS-CoV-2 (S-RBD) 70	Naive	MF4	0.0185
ICS IL2	20	PepMix SARS-CoV-2 (S-RBD) 70	Naive	MF5	0.0042
ICS IL2	20	PepMix SARS-CoV-2 (S-RBD) 70	Naive	MF6	0.0211
ICS IL2	-35	PepMix SARS-CoV-2 (N) 102	Conv.	MF7	0.0079
ICS IL2	-35	PepMix SARS-CoV-2 (N) 102	Conv.	MF8	0.0199
ICS IL2	-35	PepMix SARS-CoV-2 (N) 102	Conv.	MF9	0.0107
ICS IL2	-35	PepMix SARS-CoV-2 (N) 102	αCD40.RBD	MF13	0.0071
ICS IL2	-35	PepMix SARS-CoV-2 (N) 102	Conv.	MF10	0.0053
ICS IL2	-35	PepMix SARS-CoV-2 (N) 102	αCD40.RBD	MF14	0.0068
ICS IL2	-35	PepMix SARS-CoV-2 (N) 102	αCD40.RBD	MF15	0.0023
ICS IL2	-35	PepMix SARS-CoV-2 (N) 102	αCD40.RBD	MF16	0.0062
ICS IL2	-35	PepMix SARS-CoV-2 (N) 102	Conv.	MF11	0.0126
ICS IL2	-35	PepMix SARS-CoV-2 (N) 102	αCD40.RBD	MF17	0.0081
ICS IL2	-35	PepMix SARS-CoV-2 (N) 102	Conv.	MF12	0.0083
ICS IL2	-35	PepMix SARS-CoV-2 (N) 102	αCD40.RBD	MF18	0.006
ICS IL2	-35	PepMix SARS-CoV-2 (N) 102	Naive	MF1	0.0044
ICS IL2	-35	PepMix SARS-CoV-2 (N) 102	Naive	MF2	0.0072
ICS IL2	-35	PepMix SARS-CoV-2 (N) 102	Naive	MF3	0.0064
ICS IL2	-35	PepMix SARS-CoV-2 (N) 102	Naive	MF4	0.007
ICS IL2	-35	PepMix SARS-CoV-2 (N) 102	Naive	MF5	0.0105
ICS IL2	-35	PepMix SARS-CoV-2 (N) 102	Naive	MF6	0.0158
ICS IL2	-14	PepMix SARS-CoV-2 (N) 102	Conv.	MF7	ND
ICS IL2	-14	PepMix SARS-CoV-2 (N) 102	Conv.	MF8	0.0071
ICS IL2	-14	PepMix SARS-CoV-2 (N) 102	Conv.	MF9	0.007
ICS IL2	-14	PepMix SARS-CoV-2 (N) 102	αCD40.RBD	MF13	0.015
ICS IL2	-14	PepMix SARS-CoV-2 (N) 102	Conv.	MF10	0.0019
ICS IL2	-14	PepMix SARS-CoV-2 (N) 102	αCD40.RBD	MF14	0.0391
ICS IL2	-14	PepMix SARS-CoV-2 (N) 102	αCD40.RBD	MF15	0.0026
ICS IL2	-14	PepMix SARS-CoV-2 (N) 102	αCD40.RBD	MF16	ND
ICS IL2	-14	PepMix SARS-CoV-2 (N) 102	Conv.	MF11	0.0202
ICS IL2	-14	PepMix SARS-CoV-2 (N) 102	αCD40.RBD	MF17	0.0211
ICS IL2	-14	PepMix SARS-CoV-2 (N) 102	Conv.	MF12	0.0053
ICS IL2	-14	PepMix SARS-CoV-2 (N) 102	αCD40.RBD	MF18	0.0103
ICS IL2	-14	PepMix SARS-CoV-2 (N) 102	Naive	MF1	0.0071
ICS IL2	-14	PepMix SARS-CoV-2 (N) 102	Naive	MF2	0.006
ICS IL2	-14	PepMix SARS-CoV-2 (N) 102	Naive	MF3	0.0149
ICS IL2	-14	PepMix SARS-CoV-2 (N) 102	Naive	MF4	ND
ICS IL2	-14	PepMix SARS-CoV-2 (N) 102	Naive	MF5	0.0043
ICS IL2	-14	PepMix SARS-CoV-2 (N) 102	Naive	MF6	0.0116
ICS IL2	9	PepMix SARS-CoV-2 (N) 102	Conv.	MF7	0.0217
ICS IL2	9	PepMix SARS-CoV-2 (N) 102	Conv.	MF8	0.0312
ICS IL2	9	PepMix SARS-CoV-2 (N) 102	Conv.	MF9	0.0153
ICS IL2	9	PepMix SARS-CoV-2 (N) 102	αCD40.RBD	MF13	0.0164
ICS IL2	9	PepMix SARS-CoV-2 (N) 102	Conv.	MF10	0.0265
ICS IL2	9	PepMix SARS-CoV-2 (N) 102	αCD40.RBD	MF14	0.0185
ICS IL2	9	PepMix SARS-CoV-2 (N) 102	αCD40.RBD	MF15	0.0025
ICS IL2	9	PepMix SARS-CoV-2 (N) 102	αCD40.RBD	MF16	0.0232
ICS IL2	9	PepMix SARS-CoV-2 (N) 102	Conv.	MF11	0.0243
ICS IL2	9	PepMix SARS-CoV-2 (N) 102	αCD40.RBD	MF17	0.0333
ICS IL2	9	PepMix SARS-CoV-2 (N) 102	Conv.	MF12	0.0142
ICS IL2	9	PepMix SARS-CoV-2 (N) 102	αCD40.RBD	MF18	0.0025
ICS IL2	9	PepMix SARS-CoV-2 (N) 102	Naive	MF1	0.0429
ICS IL2	9	PepMix SARS-CoV-2 (N) 102	Naive	MF2	0.1717
ICS IL2	9	PepMix SARS-CoV-2 (N) 102	Naive	MF3	0.0323
ICS IL2	9	PepMix SARS-CoV-2 (N) 102	Naive	MF4	0.0426
ICS IL2	9	PepMix SARS-CoV-2 (N) 102	Naive	MF5	0.0417
ICS IL2	9	PepMix SARS-CoV-2 (N) 102	Naive	MF6	0.0142
ICS IL2	20	PepMix SARS-CoV-2 (N) 102	Conv.	MF7	0.068
ICS IL2	20	PepMix SARS-CoV-2 (N) 102	Conv.	MF8	0.0629
ICS IL2	20	PepMix SARS-CoV-2 (N) 102	Conv.	MF9	0.0084
ICS IL2	20	PepMix SARS-CoV-2 (N) 102	αCD40.RBD	MF13	0.0419
ICS IL2	20	PepMix SARS-CoV-2 (N) 102	Conv.	MF10	0.0581
ICS IL2	20	PepMix SARS-CoV-2 (N) 102	αCD40.RBD	MF14	0.0337
ICS IL2	20	PepMix SARS-CoV-2 (N) 102	αCD40.RBD	MF15	0.0033
ICS IL2	20	PepMix SARS-CoV-2 (N) 102	αCD40.RBD	MF16	0.026
ICS IL2	20	PepMix SARS-CoV-2 (N) 102	Conv.	MF11	0.0361
ICS IL2	20	PepMix SARS-CoV-2 (N) 102	αCD40.RBD	MF17	0.0559
ICS IL2	20	PepMix SARS-CoV-2 (N) 102	Conv.	MF12	0.0156
ICS IL2	20	PepMix SARS-CoV-2 (N) 102	αCD40.RBD	MF18	0.0061
ICS IL2	20	PepMix SARS-CoV-2 (N) 102	Naive	MF1	0.0355
ICS IL2	20	PepMix SARS-CoV-2 (N) 102	Naive	MF2	0.113
ICS IL2	20	PepMix SARS-CoV-2 (N) 102	Naive	MF3	0.0533
ICS IL2	20	PepMix SARS-CoV-2 (N) 102	Naive	MF4	0.0237
ICS IL2	20	PepMix SARS-CoV-2 (N) 102	Naive	MF5	0.0143
ICS IL2	20	PepMix SARS-CoV-2 (N) 102	Naive	MF6	0.0265
ICS IFNg	-35	NS	Conv.	MF7	0.0157
ICS IFNg	-35	NS	Conv.	MF8	0.0256
ICS IFNg	-35	NS	Conv.	MF9	0.0136
ICS IFNg	-35	NS	αCD40.RBD	MF13	0.0157
ICS IFNg	-35	NS	Conv.	MF10	0.0144
ICS IFNg	-35	NS	αCD40.RBD	MF14	0.0043
ICS IFNg	-35	NS	αCD40.RBD	MF15	0
ICS IFNg	-35	NS	αCD40.RBD	MF16	0.0062
ICS IFNg	-35	NS	Conv.	MF11	0.0186
ICS IFNg	-35	NS	αCD40.RBD	MF17	0.0073
ICS IFNg	-35	NS	Conv.	MF12	0.008
ICS IFNg	-35	NS	αCD40.RBD	MF18	0.0053
ICS IFNg	-35	NS	Naive	MF1	0.0094
ICS IFNg	-35	NS	Naive	MF2	0.0264
ICS IFNg	-35	NS	Naive	MF3	0.0144
ICS IFNg	-35	NS	Naive	MF4	0.0054
ICS IFNg	-35	NS	Naive	MF5	0.0419
ICS IFNg	-35	NS	Naive	MF6	0.0138
ICS IFNg	-35	PepMix SARS-CoV-2 (S-RBD) 70	Conv.	MF7	0.0093
ICS IFNg	-35	PepMix SARS-CoV-2 (S-RBD) 70	Conv.	MF8	0.0168
ICS IFNg	-35	PepMix SARS-CoV-2 (S-RBD) 70	Conv.	MF9	0.009
ICS IFNg	-35	PepMix SARS-CoV-2 (S-RBD) 70	αCD40.RBD	MF13	0.0074
ICS IFNg	-35	PepMix SARS-CoV-2 (S-RBD) 70	Conv.	MF10	0.0087
ICS IFNg	-35	PepMix SARS-CoV-2 (S-RBD) 70	αCD40.RBD	MF14	0.0155
ICS IFNg	-35	PepMix SARS-CoV-2 (S-RBD) 70	αCD40.RBD	MF15	0.0036
ICS IFNg	-35	PepMix SARS-CoV-2 (S-RBD) 70	αCD40.RBD	MF16	0.0016
ICS IFNg	-35	PepMix SARS-CoV-2 (S-RBD) 70	Conv.	MF11	0.006
ICS IFNg	-35	PepMix SARS-CoV-2 (S-RBD) 70	αCD40.RBD	MF17	0.0179
ICS IFNg	-35	PepMix SARS-CoV-2 (S-RBD) 70	Conv.	MF12	0.0055
ICS IFNg	-35	PepMix SARS-CoV-2 (S-RBD) 70	αCD40.RBD	MF18	0
ICS IFNg	-35	PepMix SARS-CoV-2 (S-RBD) 70	Naive	MF1	0.003
ICS IFNg	-35	PepMix SARS-CoV-2 (S-RBD) 70	Naive	MF2	0.0036
ICS IFNg	-35	PepMix SARS-CoV-2 (S-RBD) 70	Naive	MF3	0
ICS IFNg	-35	PepMix SARS-CoV-2 (S-RBD) 70	Naive	MF4	0
ICS IFNg	-35	PepMix SARS-CoV-2 (S-RBD) 70	Naive	MF5	0.0148
ICS IFNg	-35	PepMix SARS-CoV-2 (S-RBD) 70	Naive	MF6	0.0213
ICS IFNg	-14	NS	Conv.	MF7	0.0173
ICS IFNg	-14	NS	Conv.	MF8	0.011
ICS IFNg	-14	NS	Conv.	MF9	0.0039
ICS IFNg	-14	NS	αCD40.RBD	MF13	0.0137
ICS IFNg	-14	NS	Conv.	MF10	0.0217
ICS IFNg	-14	NS	αCD40.RBD	MF14	0.0164
ICS IFNg	-14	NS	αCD40.RBD	MF15	0.0019
ICS IFNg	-14	NS	αCD40.RBD	MF16	0.0049
ICS IFNg	-14	NS	Conv.	MF11	0.0061
ICS IFNg	-14	NS	αCD40.RBD	MF17	0.0035
ICS IFNg	-14	NS	Conv.	MF12	0.0091
ICS IFNg	-14	NS	αCD40.RBD	MF18	0.0542
ICS IFNg	-14	NS	Naive	MF1	0.014
ICS IFNg	-14	NS	Naive	MF2	0.0488
ICS IFNg	-14	NS	Naive	MF3	0.0097
ICS IFNg	-14	NS	Naive	MF4	ND
ICS IFNg	-14	NS	Naive	MF5	0.1973
ICS IFNg	-14	NS	Naive	MF6	0.0174
ICS IFNg	-14	PepMix SARS-CoV-2 (S-RBD) 70	Conv.	MF7	0.014
ICS IFNg	-14	PepMix SARS-CoV-2 (S-RBD) 70	Conv.	MF8	0.0086
ICS IFNg	-14	PepMix SARS-CoV-2 (S-RBD) 70	Conv.	MF9	0.0095
ICS IFNg	-14	PepMix SARS-CoV-2 (S-RBD) 70	αCD40.RBD	MF13	0.0162
ICS IFNg	-14	PepMix SARS-CoV-2 (S-RBD) 70	Conv.	MF10	0.0076
ICS IFNg	-14	PepMix SARS-CoV-2 (S-RBD) 70	αCD40.RBD	MF14	0.0135
ICS IFNg	-14	PepMix SARS-CoV-2 (S-RBD) 70	αCD40.RBD	MF15	0
ICS IFNg	-14	PepMix SARS-CoV-2 (S-RBD) 70	αCD40.RBD	MF16	0.0035
ICS IFNg	-14	PepMix SARS-CoV-2 (S-RBD) 70	Conv.	MF11	0
ICS IFNg	-14	PepMix SARS-CoV-2 (S-RBD) 70	αCD40.RBD	MF17	0.0041
ICS IFNg	-14	PepMix SARS-CoV-2 (S-RBD) 70	Conv.	MF12	0.0031
ICS IFNg	-14	PepMix SARS-CoV-2 (S-RBD) 70	αCD40.RBD	MF18	0.0204
ICS IFNg	-14	PepMix SARS-CoV-2 (S-RBD) 70	Naive	MF1	0.0038
ICS IFNg	-14	PepMix SARS-CoV-2 (S-RBD) 70	Naive	MF2	0.0173
ICS IFNg	-14	PepMix SARS-CoV-2 (S-RBD) 70	Naive	MF3	0.0053
ICS IFNg	-14	PepMix SARS-CoV-2 (S-RBD) 70	Naive	MF4	ND
ICS IFNg	-14	PepMix SARS-CoV-2 (S-RBD) 70	Naive	MF5	0.036
ICS IFNg	-14	PepMix SARS-CoV-2 (S-RBD) 70	Naive	MF6	0.0133
ICS IFNg	9	NS	Conv.	MF7	0.0108
ICS IFNg	9	NS	Conv.	MF8	0.0503
ICS IFNg	9	NS	Conv.	MF9	0.0116
ICS IFNg	9	NS	αCD40.RBD	MF13	0.0396
ICS IFNg	9	NS	Conv.	MF10	0.0162
ICS IFNg	9	NS	αCD40.RBD	MF14	0.025
ICS IFNg	9	NS	αCD40.RBD	MF15	0.0081
ICS IFNg	9	NS	αCD40.RBD	MF16	0.0054
ICS IFNg	9	NS	Conv.	MF11	0.0107
ICS IFNg	9	NS	αCD40.RBD	MF17	0.0491
ICS IFNg	9	NS	Conv.	MF12	0.0199
ICS IFNg	9	NS	αCD40.RBD	MF18	0.0214
ICS IFNg	9	NS	Naive	MF1	0.1067
ICS IFNg	9	NS	Naive	MF2	0.1207
ICS IFNg	9	NS	Naive	MF3	0.0389
ICS IFNg	9	NS	Naive	MF4	0.0043
ICS IFNg	9	NS	Naive	MF5	0.0633
ICS IFNg	9	NS	Naive	MF6	0.0283
ICS IFNg	9	PepMix SARS-CoV-2 (S-RBD) 70	Conv.	MF7	0.0386
ICS IFNg	9	PepMix SARS-CoV-2 (S-RBD) 70	Conv.	MF8	0.026
ICS IFNg	9	PepMix SARS-CoV-2 (S-RBD) 70	Conv.	MF9	0.0154
ICS IFNg	9	PepMix SARS-CoV-2 (S-RBD) 70	αCD40.RBD	MF13	0.02
ICS IFNg	9	PepMix SARS-CoV-2 (S-RBD) 70	Conv.	MF10	0.005
ICS IFNg	9	PepMix SARS-CoV-2 (S-RBD) 70	αCD40.RBD	MF14	0.0135
ICS IFNg	9	PepMix SARS-CoV-2 (S-RBD) 70	αCD40.RBD	MF15	0
ICS IFNg	9	PepMix SARS-CoV-2 (S-RBD) 70	αCD40.RBD	MF16	0.1162
ICS IFNg	9	PepMix SARS-CoV-2 (S-RBD) 70	Conv.	MF11	0.0059
ICS IFNg	9	PepMix SARS-CoV-2 (S-RBD) 70	αCD40.RBD	MF17	0.0168
ICS IFNg	9	PepMix SARS-CoV-2 (S-RBD) 70	Conv.	MF12	0.0075
ICS IFNg	9	PepMix SARS-CoV-2 (S-RBD) 70	αCD40.RBD	MF18	0.0095
ICS IFNg	9	PepMix SARS-CoV-2 (S-RBD) 70	Naive	MF1	0.0606
ICS IFNg	9	PepMix SARS-CoV-2 (S-RBD) 70	Naive	MF2	0.1424
ICS IFNg	9	PepMix SARS-CoV-2 (S-RBD) 70	Naive	MF3	0.0297
ICS IFNg	9	PepMix SARS-CoV-2 (S-RBD) 70	Naive	MF4	0.0084
ICS IFNg	9	PepMix SARS-CoV-2 (S-RBD) 70	Naive	MF5	0.0397
ICS IFNg	9	PepMix SARS-CoV-2 (S-RBD) 70	Naive	MF6	0.0659
ICS IFNg	20	NS	Conv.	MF7	0.0615
ICS IFNg	20	NS	Conv.	MF8	0.0301
ICS IFNg	20	NS	Conv.	MF9	0.0107
ICS IFNg	20	NS	αCD40.RBD	MF13	0.055
ICS IFNg	20	NS	Conv.	MF10	0.0502
ICS IFNg	20	NS	αCD40.RBD	MF14	0.0422
ICS IFNg	20	NS	αCD40.RBD	MF15	0
ICS IFNg	20	NS	αCD40.RBD	MF16	0.0065
ICS IFNg	20	NS	Conv.	MF11	0.1229
ICS IFNg	20	NS	αCD40.RBD	MF17	0.034
ICS IFNg	20	NS	Conv.	MF12	0.0169
ICS IFNg	20	NS	αCD40.RBD	MF18	0.0141
ICS IFNg	20	NS	Naive	MF1	0.06
ICS IFNg	20	NS	Naive	MF2	0.2072
ICS IFNg	20	NS	Naive	MF3	0.2323
ICS IFNg	20	NS	Naive	MF4	0.0061
ICS IFNg	20	NS	Naive	MF5	0.0171
ICS IFNg	20	NS	Naive	MF6	0.0296
ICS IFNg	20	PepMix SARS-CoV-2 (S-RBD) 70	Conv.	MF7	0.0557
ICS IFNg	20	PepMix SARS-CoV-2 (S-RBD) 70	Conv.	MF8	0.0432
ICS IFNg	20	PepMix SARS-CoV-2 (S-RBD) 70	Conv.	MF9	0.012
ICS IFNg	20	PepMix SARS-CoV-2 (S-RBD) 70	αCD40.RBD	MF13	0.0991
ICS IFNg	20	PepMix SARS-CoV-2 (S-RBD) 70	Conv.	MF10	0.1414
ICS IFNg	20	PepMix SARS-CoV-2 (S-RBD) 70	αCD40.RBD	MF14	0.0455
ICS IFNg	20	PepMix SARS-CoV-2 (S-RBD) 70	αCD40.RBD	MF15	0.0033
ICS IFNg	20	PepMix SARS-CoV-2 (S-RBD) 70	αCD40.RBD	MF16	0.0356
ICS IFNg	20	PepMix SARS-CoV-2 (S-RBD) 70	Conv.	MF11	0.0457
ICS IFNg	20	PepMix SARS-CoV-2 (S-RBD) 70	αCD40.RBD	MF17	0.0127
ICS IFNg	20	PepMix SARS-CoV-2 (S-RBD) 70	Conv.	MF12	0.0195
ICS IFNg	20	PepMix SARS-CoV-2 (S-RBD) 70	αCD40.RBD	MF18	0
ICS IFNg	20	PepMix SARS-CoV-2 (S-RBD) 70	Naive	MF1	0.0086
ICS IFNg	20	PepMix SARS-CoV-2 (S-RBD) 70	Naive	MF2	0.4275
ICS IFNg	20	PepMix SARS-CoV-2 (S-RBD) 70	Naive	MF3	0.0771
ICS IFNg	20	PepMix SARS-CoV-2 (S-RBD) 70	Naive	MF4	0.0056
ICS IFNg	20	PepMix SARS-CoV-2 (S-RBD) 70	Naive	MF5	0.0063
ICS IFNg	20	PepMix SARS-CoV-2 (S-RBD) 70	Naive	MF6	0.0211
ICS IFNg	-35	PepMix SARS-CoV-2 (N) 102	Conv.	MF7	0.008
ICS IFNg	-35	PepMix SARS-CoV-2 (N) 102	Conv.	MF8	0.013
ICS IFNg	-35	PepMix SARS-CoV-2 (N) 102	Conv.	MF9	0.014
ICS IFNg	-35	PepMix SARS-CoV-2 (N) 102	αCD40.RBD	MF13	0.021
ICS IFNg	-35	PepMix SARS-CoV-2 (N) 102	Conv.	MF10	0.011
ICS IFNg	-35	PepMix SARS-CoV-2 (N) 102	αCD40.RBD	MF14	0.016
ICS IFNg	-35	PepMix SARS-CoV-2 (N) 102	αCD40.RBD	MF15	0.004
ICS IFNg	-35	PepMix SARS-CoV-2 (N) 102	αCD40.RBD	MF16	0.003
ICS IFNg	-35	PepMix SARS-CoV-2 (N) 102	Conv.	MF11	0.011
ICS IFNg	-35	PepMix SARS-CoV-2 (N) 102	αCD40.RBD	MF17	0.014
ICS IFNg	-35	PepMix SARS-CoV-2 (N) 102	Conv.	MF12	0.006
ICS IFNg	-35	PepMix SARS-CoV-2 (N) 102	αCD40.RBD	MF18	0.003
ICS IFNg	-35	PepMix SARS-CoV-2 (N) 102	Naive	MF1	0.009
ICS IFNg	-35	PepMix SARS-CoV-2 (N) 102	Naive	MF2	0.021
ICS IFNg	-35	PepMix SARS-CoV-2 (N) 102	Naive	MF3	0.002
ICS IFNg	-35	PepMix SARS-CoV-2 (N) 102	Naive	MF4	0.002
ICS IFNg	-35	PepMix SARS-CoV-2 (N) 102	Naive	MF5	0.027
ICS IFNg	-35	PepMix SARS-CoV-2 (N) 102	Naive	MF6	0.016
ICS IFNg	-14	PepMix SARS-CoV-2 (N) 102	Conv.	MF7	ND
ICS IFNg	-14	PepMix SARS-CoV-2 (N) 102	Conv.	MF8	0.014
ICS IFNg	-14	PepMix SARS-CoV-2 (N) 102	Conv.	MF9	0.012
ICS IFNg	-14	PepMix SARS-CoV-2 (N) 102	αCD40.RBD	MF13	0.025
ICS IFNg	-14	PepMix SARS-CoV-2 (N) 102	Conv.	MF10	0.006
ICS IFNg	-14	PepMix SARS-CoV-2 (N) 102	αCD40.RBD	MF14	0.018
ICS IFNg	-14	PepMix SARS-CoV-2 (N) 102	αCD40.RBD	MF15	0.005
ICS IFNg	-14	PepMix SARS-CoV-2 (N) 102	αCD40.RBD	MF16	ND
ICS IFNg	-14	PepMix SARS-CoV-2 (N) 102	Conv.	MF11	0.013
ICS IFNg	-14	PepMix SARS-CoV-2 (N) 102	αCD40.RBD	MF17	0.019
ICS IFNg	-14	PepMix SARS-CoV-2 (N) 102	Conv.	MF12	0.012
ICS IFNg	-14	PepMix SARS-CoV-2 (N) 102	αCD40.RBD	MF18	0.048
ICS IFNg	-14	PepMix SARS-CoV-2 (N) 102	Naive	MF1	0.021
ICS IFNg	-14	PepMix SARS-CoV-2 (N) 102	Naive	MF2	0.048
ICS IFNg	-14	PepMix SARS-CoV-2 (N) 102	Naive	MF3	0.005
ICS IFNg	-14	PepMix SARS-CoV-2 (N) 102	Naive	MF4	ND
ICS IFNg	-14	PepMix SARS-CoV-2 (N) 102	Naive	MF5	0.126
ICS IFNg	-14	PepMix SARS-CoV-2 (N) 102	Naive	MF6	0.037
ICS IFNg	9	PepMix SARS-CoV-2 (N) 102	Conv.	MF7	0.065
ICS IFNg	9	PepMix SARS-CoV-2 (N) 102	Conv.	MF8	0.421
ICS IFNg	9	PepMix SARS-CoV-2 (N) 102	Conv.	MF9	0.071
ICS IFNg	9	PepMix SARS-CoV-2 (N) 102	αCD40.RBD	MF13	0.058
ICS IFNg	9	PepMix SARS-CoV-2 (N) 102	Conv.	MF10	0.255
ICS IFNg	9	PepMix SARS-CoV-2 (N) 102	αCD40.RBD	MF14	0.058
ICS IFNg	9	PepMix SARS-CoV-2 (N) 102	αCD40.RBD	MF15	0.018
ICS IFNg	9	PepMix SARS-CoV-2 (N) 102	αCD40.RBD	MF16	0.102
ICS IFNg	9	PepMix SARS-CoV-2 (N) 102	Conv.	MF11	0.045
ICS IFNg	9	PepMix SARS-CoV-2 (N) 102	αCD40.RBD	MF17	0.11
ICS IFNg	9	PepMix SARS-CoV-2 (N) 102	Conv.	MF12	0.092
ICS IFNg	9	PepMix SARS-CoV-2 (N) 102	αCD40.RBD	MF18	0.023
ICS IFNg	9	PepMix SARS-CoV-2 (N) 102	Naive	MF1	0.84
ICS IFNg	9	PepMix SARS-CoV-2 (N) 102	Naive	MF2	1.459
ICS IFNg	9	PepMix SARS-CoV-2 (N) 102	Naive	MF3	0.658
ICS IFNg	9	PepMix SARS-CoV-2 (N) 102	Naive	MF4	0.383
ICS IFNg	9	PepMix SARS-CoV-2 (N) 102	Naive	MF5	0.72
ICS IFNg	9	PepMix SARS-CoV-2 (N) 102	Naive	MF6	0.196
ICS IFNg	20	PepMix SARS-CoV-2 (N) 102	Conv.	MF7	0.136
ICS IFNg	20	PepMix SARS-CoV-2 (N) 102	Conv.	MF8	0.097
ICS IFNg	20	PepMix SARS-CoV-2 (N) 102	Conv.	MF9	0.04
ICS IFNg	20	PepMix SARS-CoV-2 (N) 102	αCD40.RBD	MF13	0.089
ICS IFNg	20	PepMix SARS-CoV-2 (N) 102	Conv.	MF10	0.247
ICS IFNg	20	PepMix SARS-CoV-2 (N) 102	αCD40.RBD	MF14	0.051
ICS IFNg	20	PepMix SARS-CoV-2 (N) 102	αCD40.RBD	MF15	0.008
ICS IFNg	20	PepMix SARS-CoV-2 (N) 102	αCD40.RBD	MF16	0.042
ICS IFNg	20	PepMix SARS-CoV-2 (N) 102	Conv.	MF11	0.133
ICS IFNg	20	PepMix SARS-CoV-2 (N) 102	αCD40.RBD	MF17	0.091
ICS IFNg	20	PepMix SARS-CoV-2 (N) 102	Conv.	MF12	0.052
ICS IFNg	20	PepMix SARS-CoV-2 (N) 102	αCD40.RBD	MF18	0.026
ICS IFNg	20	PepMix SARS-CoV-2 (N) 102	Naive	MF1	0.327
ICS IFNg	20	PepMix SARS-CoV-2 (N) 102	Naive	MF2	0.716
ICS IFNg	20	PepMix SARS-CoV-2 (N) 102	Naive	MF3	0.591
ICS IFNg	20	PepMix SARS-CoV-2 (N) 102	Naive	MF4	0.173
ICS IFNg	20	PepMix SARS-CoV-2 (N) 102	Naive	MF5	0.055
ICS IFNg	20	PepMix SARS-CoV-2 (N) 102	Naive	MF6	0.223
ICS TNFa	-35	NS	Conv.	MF7	0.0314
ICS TNFa	-35	NS	Conv.	MF8	0.0037
ICS TNFa	-35	NS	Conv.	MF9	0
ICS TNFa	-35	NS	αCD40.RBD	MF13	0.0157
ICS TNFa	-35	NS	Conv.	MF10	0.0041
ICS TNFa	-35	NS	αCD40.RBD	MF14	0.0014
ICS TNFa	-35	NS	αCD40.RBD	MF15	0
ICS TNFa	-35	NS	αCD40.RBD	MF16	0.0031
ICS TNFa	-35	NS	Conv.	MF11	0.0075
ICS TNFa	-35	NS	αCD40.RBD	MF17	0.0037
ICS TNFa	-35	NS	Conv.	MF12	0.0013
ICS TNFa	-35	NS	αCD40.RBD	MF18	0.0026
ICS TNFa	-35	NS	Naive	MF1	0.011
ICS TNFa	-35	NS	Naive	MF2	0.0188
ICS TNFa	-35	NS	Naive	MF3	0.0024
ICS TNFa	-35	NS	Naive	MF4	0.0107
ICS TNFa	-35	NS	Naive	MF5	0.0227
ICS TNFa	-35	NS	Naive	MF6	0.0059
ICS TNFa	-35	PepMix SARS-CoV-2 (S-RBD) 70	Conv.	MF7	0
ICS TNFa	-35	PepMix SARS-CoV-2 (S-RBD) 70	Conv.	MF8	0.0034
ICS TNFa	-35	PepMix SARS-CoV-2 (S-RBD) 70	Conv.	MF9	0
ICS TNFa	-35	PepMix SARS-CoV-2 (S-RBD) 70	αCD40.RBD	MF13	0.0019
ICS TNFa	-35	PepMix SARS-CoV-2 (S-RBD) 70	Conv.	MF10	0
ICS TNFa	-35	PepMix SARS-CoV-2 (S-RBD) 70	αCD40.RBD	MF14	0.0028
ICS TNFa	-35	PepMix SARS-CoV-2 (S-RBD) 70	αCD40.RBD	MF15	0
ICS TNFa	-35	PepMix SARS-CoV-2 (S-RBD) 70	αCD40.RBD	MF16	0
ICS TNFa	-35	PepMix SARS-CoV-2 (S-RBD) 70	Conv.	MF11	0
ICS TNFa	-35	PepMix SARS-CoV-2 (S-RBD) 70	αCD40.RBD	MF17	0.0013
ICS TNFa	-35	PepMix SARS-CoV-2 (S-RBD) 70	Conv.	MF12	0.0014
ICS TNFa	-35	PepMix SARS-CoV-2 (S-RBD) 70	αCD40.RBD	MF18	0
ICS TNFa	-35	PepMix SARS-CoV-2 (S-RBD) 70	Naive	MF1	0
ICS TNFa	-35	PepMix SARS-CoV-2 (S-RBD) 70	Naive	MF2	0
ICS TNFa	-35	PepMix SARS-CoV-2 (S-RBD) 70	Naive	MF3	0
ICS TNFa	-35	PepMix SARS-CoV-2 (S-RBD) 70	Naive	MF4	0
ICS TNFa	-35	PepMix SARS-CoV-2 (S-RBD) 70	Naive	MF5	0.0012
ICS TNFa	-35	PepMix SARS-CoV-2 (S-RBD) 70	Naive	MF6	0
ICS TNFa	-14	NS	Conv.	MF7	0.0345
ICS TNFa	-14	NS	Conv.	MF8	0
ICS TNFa	-14	NS	Conv.	MF9	0.002
ICS TNFa	-14	NS	αCD40.RBD	MF13	0.0103
ICS TNFa	-14	NS	Conv.	MF10	0.0036
ICS TNFa	-14	NS	αCD40.RBD	MF14	0.0061
ICS TNFa	-14	NS	αCD40.RBD	MF15	0
ICS TNFa	-14	NS	αCD40.RBD	MF16	0.0244
ICS TNFa	-14	NS	Conv.	MF11	0.0123
ICS TNFa	-14	NS	αCD40.RBD	MF17	0.0018
ICS TNFa	-14	NS	Conv.	MF12	0.0091
ICS TNFa	-14	NS	αCD40.RBD	MF18	0.0298
ICS TNFa	-14	NS	Naive	MF1	0.0202
ICS TNFa	-14	NS	Naive	MF2	0.0244
ICS TNFa	-14	NS	Naive	MF3	0.0081
ICS TNFa	-14	NS	Naive	MF4	ND
ICS TNFa	-14	NS	Naive	MF5	0.1022
ICS TNFa	-14	NS	Naive	MF6	0.0224
ICS TNFa	-14	PepMix SARS-CoV-2 (S-RBD) 70	Conv.	MF7	0.0175
ICS TNFa	-14	PepMix SARS-CoV-2 (S-RBD) 70	Conv.	MF8	0
ICS TNFa	-14	PepMix SARS-CoV-2 (S-RBD) 70	Conv.	MF9	0
ICS TNFa	-14	PepMix SARS-CoV-2 (S-RBD) 70	αCD40.RBD	MF13	0.0035
ICS TNFa	-14	PepMix SARS-CoV-2 (S-RBD) 70	Conv.	MF10	0
ICS TNFa	-14	PepMix SARS-CoV-2 (S-RBD) 70	αCD40.RBD	MF14	0.0135
ICS TNFa	-14	PepMix SARS-CoV-2 (S-RBD) 70	αCD40.RBD	MF15	0
ICS TNFa	-14	PepMix SARS-CoV-2 (S-RBD) 70	αCD40.RBD	MF16	0.0035
ICS TNFa	-14	PepMix SARS-CoV-2 (S-RBD) 70	Conv.	MF11	0.0019
ICS TNFa	-14	PepMix SARS-CoV-2 (S-RBD) 70	αCD40.RBD	MF17	0.002
ICS TNFa	-14	PepMix SARS-CoV-2 (S-RBD) 70	Conv.	MF12	0.0031
ICS TNFa	-14	PepMix SARS-CoV-2 (S-RBD) 70	αCD40.RBD	MF18	0
ICS TNFa	-14	PepMix SARS-CoV-2 (S-RBD) 70	Naive	MF1	0.0057
ICS TNFa	-14	PepMix SARS-CoV-2 (S-RBD) 70	Naive	MF2	0.0058
ICS TNFa	-14	PepMix SARS-CoV-2 (S-RBD) 70	Naive	MF3	0
ICS TNFa	-14	PepMix SARS-CoV-2 (S-RBD) 70	Naive	MF4	ND
ICS TNFa	-14	PepMix SARS-CoV-2 (S-RBD) 70	Naive	MF5	0.0081
ICS TNFa	-14	PepMix SARS-CoV-2 (S-RBD) 70	Naive	MF6	0
ICS TNFa	9	NS	Conv.	MF7	0.043
ICS TNFa	9	NS	Conv.	MF8	0.0101
ICS TNFa	9	NS	Conv.	MF9	0.0039
ICS TNFa	9	NS	αCD40.RBD	MF13	0.0252
ICS TNFa	9	NS	Conv.	MF10	0.0065
ICS TNFa	9	NS	αCD40.RBD	MF14	0.0278
ICS TNFa	9	NS	αCD40.RBD	MF15	0.0035
ICS TNFa	9	NS	αCD40.RBD	MF16	0.0161
ICS TNFa	9	NS	Conv.	MF11	0.0064
ICS TNFa	9	NS	αCD40.RBD	MF17	0.0098
ICS TNFa	9	NS	Conv.	MF12	0.0072
ICS TNFa	9	NS	αCD40.RBD	MF18	0
ICS TNFa	9	NS	Naive	MF1	0.0739
ICS TNFa	9	NS	Naive	MF2	0.0453
ICS TNFa	9	NS	Naive	MF3	0.048
ICS TNFa	9	NS	Naive	MF4	0.01
ICS TNFa	9	NS	Naive	MF5	0.0428
ICS TNFa	9	NS	Naive	MF6	0.0195
ICS TNFa	9	PepMix SARS-CoV-2 (S-RBD) 70	Conv.	MF7	0.0129
ICS TNFa	9	PepMix SARS-CoV-2 (S-RBD) 70	Conv.	MF8	0.0156
ICS TNFa	9	PepMix SARS-CoV-2 (S-RBD) 70	Conv.	MF9	0
ICS TNFa	9	PepMix SARS-CoV-2 (S-RBD) 70	αCD40.RBD	MF13	0.01
ICS TNFa	9	PepMix SARS-CoV-2 (S-RBD) 70	Conv.	MF10	0
ICS TNFa	9	PepMix SARS-CoV-2 (S-RBD) 70	αCD40.RBD	MF14	0.0054
ICS TNFa	9	PepMix SARS-CoV-2 (S-RBD) 70	αCD40.RBD	MF15	0
ICS TNFa	9	PepMix SARS-CoV-2 (S-RBD) 70	αCD40.RBD	MF16	0.0145
ICS TNFa	9	PepMix SARS-CoV-2 (S-RBD) 70	Conv.	MF11	0.0023
ICS TNFa	9	PepMix SARS-CoV-2 (S-RBD) 70	αCD40.RBD	MF17	0.0084
ICS TNFa	9	PepMix SARS-CoV-2 (S-RBD) 70	Conv.	MF12	0.0037
ICS TNFa	9	PepMix SARS-CoV-2 (S-RBD) 70	αCD40.RBD	MF18	0
ICS TNFa	9	PepMix SARS-CoV-2 (S-RBD) 70	Naive	MF1	0.0078
ICS TNFa	9	PepMix SARS-CoV-2 (S-RBD) 70	Naive	MF2	0.0178
ICS TNFa	9	PepMix SARS-CoV-2 (S-RBD) 70	Naive	MF3	0.0027
ICS TNFa	9	PepMix SARS-CoV-2 (S-RBD) 70	Naive	MF4	0.0068
ICS TNFa	9	PepMix SARS-CoV-2 (S-RBD) 70	Naive	MF5	0.0063
ICS TNFa	9	PepMix SARS-CoV-2 (S-RBD) 70	Naive	MF6	0.0018
ICS TNFa	20	NS	Conv.	MF7	0.0492
ICS TNFa	20	NS	Conv.	MF8	0
ICS TNFa	20	NS	Conv.	MF9	0.0046
ICS TNFa	20	NS	αCD40.RBD	MF13	0.0093
ICS TNFa	20	NS	Conv.	MF10	0.0031
ICS TNFa	20	NS	αCD40.RBD	MF14	0.0106
ICS TNFa	20	NS	αCD40.RBD	MF15	0.0027
ICS TNFa	20	NS	αCD40.RBD	MF16	0.0033
ICS TNFa	20	NS	Conv.	MF11	0.024
ICS TNFa	20	NS	αCD40.RBD	MF17	0.012
ICS TNFa	20	NS	Conv.	MF12	0.0135
ICS TNFa	20	NS	αCD40.RBD	MF18	0.01
ICS TNFa	20	NS	Naive	MF1	0.0384
ICS TNFa	20	NS	Naive	MF2	0.0746
ICS TNFa	20	NS	Naive	MF3	0.0339
ICS TNFa	20	NS	Naive	MF4	0.0106
ICS TNFa	20	NS	Naive	MF5	0.0133
ICS TNFa	20	NS	Naive	MF6	0.0169
ICS TNFa	20	PepMix SARS-CoV-2 (S-RBD) 70	Conv.	MF7	0.0209
ICS TNFa	20	PepMix SARS-CoV-2 (S-RBD) 70	Conv.	MF8	0
ICS TNFa	20	PepMix SARS-CoV-2 (S-RBD) 70	Conv.	MF9	0
ICS TNFa	20	PepMix SARS-CoV-2 (S-RBD) 70	αCD40.RBD	MF13	0.003
ICS TNFa	20	PepMix SARS-CoV-2 (S-RBD) 70	Conv.	MF10	0.0026
ICS TNFa	20	PepMix SARS-CoV-2 (S-RBD) 70	αCD40.RBD	MF14	0.0051
ICS TNFa	20	PepMix SARS-CoV-2 (S-RBD) 70	αCD40.RBD	MF15	0
ICS TNFa	20	PepMix SARS-CoV-2 (S-RBD) 70	αCD40.RBD	MF16	0
ICS TNFa	20	PepMix SARS-CoV-2 (S-RBD) 70	Conv.	MF11	0
ICS TNFa	20	PepMix SARS-CoV-2 (S-RBD) 70	αCD40.RBD	MF17	0
ICS TNFa	20	PepMix SARS-CoV-2 (S-RBD) 70	Conv.	MF12	0.0043
ICS TNFa	20	PepMix SARS-CoV-2 (S-RBD) 70	αCD40.RBD	MF18	0
ICS TNFa	20	PepMix SARS-CoV-2 (S-RBD) 70	Naive	MF1	0.0058
ICS TNFa	20	PepMix SARS-CoV-2 (S-RBD) 70	Naive	MF2	0.0199
ICS TNFa	20	PepMix SARS-CoV-2 (S-RBD) 70	Naive	MF3	0.0051
ICS TNFa	20	PepMix SARS-CoV-2 (S-RBD) 70	Naive	MF4	0.0093
ICS TNFa	20	PepMix SARS-CoV-2 (S-RBD) 70	Naive	MF5	0.0042
ICS TNFa	20	PepMix SARS-CoV-2 (S-RBD) 70	Naive	MF6	0
ICS TNFa	-35	PepMix SARS-CoV-2 (N) 102	Conv.	MF7	0.0079
ICS TNFa	-35	PepMix SARS-CoV-2 (N) 102	Conv.	MF8	0.0066
ICS TNFa	-35	PepMix SARS-CoV-2 (N) 102	Conv.	MF9	0.0036
ICS TNFa	-35	PepMix SARS-CoV-2 (N) 102	αCD40.RBD	MF13	0.0106
ICS TNFa	-35	PepMix SARS-CoV-2 (N) 102	Conv.	MF10	0
ICS TNFa	-35	PepMix SARS-CoV-2 (N) 102	αCD40.RBD	MF14	0.0081
ICS TNFa	-35	PepMix SARS-CoV-2 (N) 102	αCD40.RBD	MF15	0.0012
ICS TNFa	-35	PepMix SARS-CoV-2 (N) 102	αCD40.RBD	MF16	0.0016
ICS TNFa	-35	PepMix SARS-CoV-2 (N) 102	Conv.	MF11	0.0018
ICS TNFa	-35	PepMix SARS-CoV-2 (N) 102	αCD40.RBD	MF17	0
ICS TNFa	-35	PepMix SARS-CoV-2 (N) 102	Conv.	MF12	0.0014
ICS TNFa	-35	PepMix SARS-CoV-2 (N) 102	αCD40.RBD	MF18	0.006
ICS TNFa	-35	PepMix SARS-CoV-2 (N) 102	Naive	MF1	0.0073
ICS TNFa	-35	PepMix SARS-CoV-2 (N) 102	Naive	MF2	0.0107
ICS TNFa	-35	PepMix SARS-CoV-2 (N) 102	Naive	MF3	0
ICS TNFa	-35	PepMix SARS-CoV-2 (N) 102	Naive	MF4	0.0052
ICS TNFa	-35	PepMix SARS-CoV-2 (N) 102	Naive	MF5	0.0183
ICS TNFa	-35	PepMix SARS-CoV-2 (N) 102	Naive	MF6	0
ICS TNFa	-14	PepMix SARS-CoV-2 (N) 102	Conv.	MF7	ND
ICS TNFa	-14	PepMix SARS-CoV-2 (N) 102	Conv.	MF8	0.0036
ICS TNFa	-14	PepMix SARS-CoV-2 (N) 102	Conv.	MF9	0
ICS TNFa	-14	PepMix SARS-CoV-2 (N) 102	αCD40.RBD	MF13	0.01
ICS TNFa	-14	PepMix SARS-CoV-2 (N) 102	Conv.	MF10	0
ICS TNFa	-14	PepMix SARS-CoV-2 (N) 102	αCD40.RBD	MF14	0.0092
ICS TNFa	-14	PepMix SARS-CoV-2 (N) 102	αCD40.RBD	MF15	0.0026
ICS TNFa	-14	PepMix SARS-CoV-2 (N) 102	αCD40.RBD	MF16	ND
ICS TNFa	-14	PepMix SARS-CoV-2 (N) 102	Conv.	MF11	0.0034
ICS TNFa	-14	PepMix SARS-CoV-2 (N) 102	αCD40.RBD	MF17	0.0053
ICS TNFa	-14	PepMix SARS-CoV-2 (N) 102	Conv.	MF12	0.004
ICS TNFa	-14	PepMix SARS-CoV-2 (N) 102	αCD40.RBD	MF18	0.0206
ICS TNFa	-14	PepMix SARS-CoV-2 (N) 102	Naive	MF1	0.0142
ICS TNFa	-14	PepMix SARS-CoV-2 (N) 102	Naive	MF2	0.006
ICS TNFa	-14	PepMix SARS-CoV-2 (N) 102	Naive	MF3	0.005
ICS TNFa	-14	PepMix SARS-CoV-2 (N) 102	Naive	MF4	ND
ICS TNFa	-14	PepMix SARS-CoV-2 (N) 102	Naive	MF5	0.0398
ICS TNFa	-14	PepMix SARS-CoV-2 (N) 102	Naive	MF6	0.0255
ICS TNFa	9	PepMix SARS-CoV-2 (N) 102	Conv.	MF7	0.0542
ICS TNFa	9	PepMix SARS-CoV-2 (N) 102	Conv.	MF8	0.0572
ICS TNFa	9	PepMix SARS-CoV-2 (N) 102	Conv.	MF9	0.0038
ICS TNFa	9	PepMix SARS-CoV-2 (N) 102	αCD40.RBD	MF13	0.02
ICS TNFa	9	PepMix SARS-CoV-2 (N) 102	Conv.	MF10	0.053
ICS TNFa	9	PepMix SARS-CoV-2 (N) 102	αCD40.RBD	MF14	0.0238
ICS TNFa	9	PepMix SARS-CoV-2 (N) 102	αCD40.RBD	MF15	0.0063
ICS TNFa	9	PepMix SARS-CoV-2 (N) 102	αCD40.RBD	MF16	0.0185
ICS TNFa	9	PepMix SARS-CoV-2 (N) 102	Conv.	MF11	0.0041
ICS TNFa	9	PepMix SARS-CoV-2 (N) 102	αCD40.RBD	MF17	0.0118
ICS TNFa	9	PepMix SARS-CoV-2 (N) 102	Conv.	MF12	0.0195
ICS TNFa	9	PepMix SARS-CoV-2 (N) 102	αCD40.RBD	MF18	0.0076
ICS TNFa	9	PepMix SARS-CoV-2 (N) 102	Naive	MF1	0.0974
ICS TNFa	9	PepMix SARS-CoV-2 (N) 102	Naive	MF2	0.0772
ICS TNFa	9	PepMix SARS-CoV-2 (N) 102	Naive	MF3	0.0621
ICS TNFa	9	PepMix SARS-CoV-2 (N) 102	Naive	MF4	0.0353
ICS TNFa	9	PepMix SARS-CoV-2 (N) 102	Naive	MF5	0.0501
ICS TNFa	9	PepMix SARS-CoV-2 (N) 102	Naive	MF6	0.0079
ICS TNFa	20	PepMix SARS-CoV-2 (N) 102	Conv.	MF7	0.0124
ICS TNFa	20	PepMix SARS-CoV-2 (N) 102	Conv.	MF8	0.029
ICS TNFa	20	PepMix SARS-CoV-2 (N) 102	Conv.	MF9	0.0084
ICS TNFa	20	PepMix SARS-CoV-2 (N) 102	αCD40.RBD	MF13	0.0115
ICS TNFa	20	PepMix SARS-CoV-2 (N) 102	Conv.	MF10	0.0727
ICS TNFa	20	PepMix SARS-CoV-2 (N) 102	αCD40.RBD	MF14	0.0048
ICS TNFa	20	PepMix SARS-CoV-2 (N) 102	αCD40.RBD	MF15	0.0017
ICS TNFa	20	PepMix SARS-CoV-2 (N) 102	αCD40.RBD	MF16	0.013
ICS TNFa	20	PepMix SARS-CoV-2 (N) 102	Conv.	MF11	0.0082
ICS TNFa	20	PepMix SARS-CoV-2 (N) 102	αCD40.RBD	MF17	0.0166
ICS TNFa	20	PepMix SARS-CoV-2 (N) 102	Conv.	MF12	0.0121
ICS TNFa	20	PepMix SARS-CoV-2 (N) 102	αCD40.RBD	MF18	0.0041
ICS TNFa	20	PepMix SARS-CoV-2 (N) 102	Naive	MF1	0.0609
ICS TNFa	20	PepMix SARS-CoV-2 (N) 102	Naive	MF2	0.0471
ICS TNFa	20	PepMix SARS-CoV-2 (N) 102	Naive	MF3	0.1163
ICS TNFa	20	PepMix SARS-CoV-2 (N) 102	Naive	MF4	0.0292
ICS TNFa	20	PepMix SARS-CoV-2 (N) 102	Naive	MF5	0.0204
ICS TNFa	20	PepMix SARS-CoV-2 (N) 102	Naive	MF6	0.0133
ICS IL17	-35	NS	Conv.	MF7	0
ICS IL17	-35	NS	Conv.	MF8	0
ICS IL17	-35	NS	Conv.	MF9	0.00584
ICS IL17	-35	NS	αCD40.RBD	MF13	0.00196
ICS IL17	-35	NS	Conv.	MF10	0.0041
ICS IL17	-35	NS	αCD40.RBD	MF14	0.00143
ICS IL17	-35	NS	αCD40.RBD	MF15	0.00718
ICS IL17	-35	NS	αCD40.RBD	MF16	0.0062
ICS IL17	-35	NS	Conv.	MF11	0.00931
ICS IL17	-35	NS	αCD40.RBD	MF17	0.00735
ICS IL17	-35	NS	Conv.	MF12	0.01064
ICS IL17	-35	NS	αCD40.RBD	MF18	0.00263
ICS IL17	-35	NS	Naive	MF1	0.00156
ICS IL17	-35	NS	Naive	MF2	0.01507
ICS IL17	-35	NS	Naive	MF3	0.0024
ICS IL17	-35	NS	Naive	MF4	0
ICS IL17	-35	NS	Naive	MF5	0.00717
ICS IL17	-35	NS	Naive	MF6	0.00985
ICS IL17	-35	PepMix SARS-CoV-2 (S-RBD) 70	Conv.	MF7	0.01856
ICS IL17	-35	PepMix SARS-CoV-2 (S-RBD) 70	Conv.	MF8	0.00671
ICS IL17	-35	PepMix SARS-CoV-2 (S-RBD) 70	Conv.	MF9	0.0018
ICS IL17	-35	PepMix SARS-CoV-2 (S-RBD) 70	αCD40.RBD	MF13	0
ICS IL17	-35	PepMix SARS-CoV-2 (S-RBD) 70	Conv.	MF10	0.00348
ICS IL17	-35	PepMix SARS-CoV-2 (S-RBD) 70	αCD40.RBD	MF14	0.00281
ICS IL17	-35	PepMix SARS-CoV-2 (S-RBD) 70	αCD40.RBD	MF15	0.00238
ICS IL17	-35	PepMix SARS-CoV-2 (S-RBD) 70	αCD40.RBD	MF16	0.00623
ICS IL17	-35	PepMix SARS-CoV-2 (S-RBD) 70	Conv.	MF11	0.00599
ICS IL17	-35	PepMix SARS-CoV-2 (S-RBD) 70	αCD40.RBD	MF17	0.00638
ICS IL17	-35	PepMix SARS-CoV-2 (S-RBD) 70	Conv.	MF12	0.00277
ICS IL17	-35	PepMix SARS-CoV-2 (S-RBD) 70	αCD40.RBD	MF18	0.00296
ICS IL17	-35	PepMix SARS-CoV-2 (S-RBD) 70	Naive	MF1	0
ICS IL17	-35	PepMix SARS-CoV-2 (S-RBD) 70	Naive	MF2	0.00719
ICS IL17	-35	PepMix SARS-CoV-2 (S-RBD) 70	Naive	MF3	0.00441
ICS IL17	-35	PepMix SARS-CoV-2 (S-RBD) 70	Naive	MF4	0
ICS IL17	-35	PepMix SARS-CoV-2 (S-RBD) 70	Naive	MF5	0.00739
ICS IL17	-35	PepMix SARS-CoV-2 (S-RBD) 70	Naive	MF6	0.01065
ICS IL17	-14	NS	Conv.	MF7	0.00345
ICS IL17	-14	NS	Conv.	MF8	0.00734
ICS IL17	-14	NS	Conv.	MF9	0.00585
ICS IL17	-14	NS	αCD40.RBD	MF13	0.00229
ICS IL17	-14	NS	Conv.	MF10	0
ICS IL17	-14	NS	αCD40.RBD	MF14	0.00817
ICS IL17	-14	NS	αCD40.RBD	MF15	0.00189
ICS IL17	-14	NS	αCD40.RBD	MF16	0.00978
ICS IL17	-14	NS	Conv.	MF11	0.00613
ICS IL17	-14	NS	αCD40.RBD	MF17	0.00352
ICS IL17	-14	NS	Conv.	MF12	0.00682
ICS IL17	-14	NS	αCD40.RBD	MF18	0
ICS IL17	-14	NS	Naive	MF1	0.00156
ICS IL17	-14	NS	Naive	MF2	0
ICS IL17	-14	NS	Naive	MF3	0
ICS IL17	-14	NS	Naive	MF4	ND
ICS IL17	-14	NS	Naive	MF5	0.00357
ICS IL17	-14	NS	Naive	MF6	0.00746
ICS IL17	-14	PepMix SARS-CoV-2 (S-RBD) 70	Conv.	MF7	0
ICS IL17	-14	PepMix SARS-CoV-2 (S-RBD) 70	Conv.	MF8	0
ICS IL17	-14	PepMix SARS-CoV-2 (S-RBD) 70	Conv.	MF9	0
ICS IL17	-14	PepMix SARS-CoV-2 (S-RBD) 70	αCD40.RBD	MF13	0.00231
ICS IL17	-14	PepMix SARS-CoV-2 (S-RBD) 70	Conv.	MF10	0.00568
ICS IL17	-14	PepMix SARS-CoV-2 (S-RBD) 70	αCD40.RBD	MF14	0.01079
ICS IL17	-14	PepMix SARS-CoV-2 (S-RBD) 70	αCD40.RBD	MF15	0.00252
ICS IL17	-14	PepMix SARS-CoV-2 (S-RBD) 70	αCD40.RBD	MF16	0.00349
ICS IL17	-14	PepMix SARS-CoV-2 (S-RBD) 70	Conv.	MF11	0
ICS IL17	-14	PepMix SARS-CoV-2 (S-RBD) 70	αCD40.RBD	MF17	0.00406
ICS IL17	-14	PepMix SARS-CoV-2 (S-RBD) 70	Conv.	MF12	0.00615
ICS IL17	-14	PepMix SARS-CoV-2 (S-RBD) 70	αCD40.RBD	MF18	0.01017
ICS IL17	-14	PepMix SARS-CoV-2 (S-RBD) 70	Naive	MF1	0.00569
ICS IL17	-14	PepMix SARS-CoV-2 (S-RBD) 70	Naive	MF2	0
ICS IL17	-14	PepMix SARS-CoV-2 (S-RBD) 70	Naive	MF3	0.00533
ICS IL17	-14	PepMix SARS-CoV-2 (S-RBD) 70	Naive	MF4	ND
ICS IL17	-14	PepMix SARS-CoV-2 (S-RBD) 70	Naive	MF5	0.00116
ICS IL17	-14	PepMix SARS-CoV-2 (S-RBD) 70	Naive	MF6	0.00663
ICS IL17	9	NS	Conv.	MF7	0.01076
ICS IL17	9	NS	Conv.	MF8	0.00503
ICS IL17	9	NS	Conv.	MF9	0.00771
ICS IL17	9	NS	αCD40.RBD	MF13	0.0054
ICS IL17	9	NS	Conv.	MF10	0.00971
ICS IL17	9	NS	αCD40.RBD	MF14	0.00834
ICS IL17	9	NS	αCD40.RBD	MF15	0.00575
ICS IL17	9	NS	αCD40.RBD	MF16	0
ICS IL17	9	NS	Conv.	MF11	0.00639
ICS IL17	9	NS	αCD40.RBD	MF17	0.01571
ICS IL17	9	NS	Conv.	MF12	0
ICS IL17	9	NS	αCD40.RBD	MF18	0.00803
ICS IL17	9	NS	Naive	MF1	0.0041
ICS IL17	9	NS	Naive	MF2	0.03016
ICS IL17	9	NS	Naive	MF3	0.01144
ICS IL17	9	NS	Naive	MF4	0.00573
ICS IL17	9	NS	Naive	MF5	0.01632
ICS IL17	9	NS	Naive	MF6	0.00531
ICS IL17	9	PepMix SARS-CoV-2 (S-RBD) 70	Conv.	MF7	0
ICS IL17	9	PepMix SARS-CoV-2 (S-RBD) 70	Conv.	MF8	0.01563
ICS IL17	9	PepMix SARS-CoV-2 (S-RBD) 70	Conv.	MF9	0.00219
ICS IL17	9	PepMix SARS-CoV-2 (S-RBD) 70	αCD40.RBD	MF13	0.002
ICS IL17	9	PepMix SARS-CoV-2 (S-RBD) 70	Conv.	MF10	0.01005
ICS IL17	9	PepMix SARS-CoV-2 (S-RBD) 70	αCD40.RBD	MF14	0.00808
ICS IL17	9	PepMix SARS-CoV-2 (S-RBD) 70	αCD40.RBD	MF15	0
ICS IL17	9	PepMix SARS-CoV-2 (S-RBD) 70	αCD40.RBD	MF16	0.02904
ICS IL17	9	PepMix SARS-CoV-2 (S-RBD) 70	Conv.	MF11	0.00704
ICS IL17	9	PepMix SARS-CoV-2 (S-RBD) 70	αCD40.RBD	MF17	0.0063
ICS IL17	9	PepMix SARS-CoV-2 (S-RBD) 70	Conv.	MF12	0.00934
ICS IL17	9	PepMix SARS-CoV-2 (S-RBD) 70	αCD40.RBD	MF18	0
ICS IL17	9	PepMix SARS-CoV-2 (S-RBD) 70	Naive	MF1	0.00976
ICS IL17	9	PepMix SARS-CoV-2 (S-RBD) 70	Naive	MF2	0.0178
ICS IL17	9	PepMix SARS-CoV-2 (S-RBD) 70	Naive	MF3	0.0081
ICS IL17	9	PepMix SARS-CoV-2 (S-RBD) 70	Naive	MF4	0.00844
ICS IL17	9	PepMix SARS-CoV-2 (S-RBD) 70	Naive	MF5	0.00418
ICS IL17	9	PepMix SARS-CoV-2 (S-RBD) 70	Naive	MF6	0.00915
ICS IL17	20	NS	Conv.	MF7	0.01229
ICS IL17	20	NS	Conv.	MF8	0.0129
ICS IL17	20	NS	Conv.	MF9	0.00153
ICS IL17	20	NS	αCD40.RBD	MF13	0.00559
ICS IL17	20	NS	Conv.	MF10	0.00628
ICS IL17	20	NS	αCD40.RBD	MF14	0.00792
ICS IL17	20	NS	αCD40.RBD	MF15	0.00272
ICS IL17	20	NS	αCD40.RBD	MF16	0.01962
ICS IL17	20	NS	Conv.	MF11	0.02119
ICS IL17	20	NS	αCD40.RBD	MF17	0.01201
ICS IL17	20	NS	Conv.	MF12	0.00676
ICS IL17	20	NS	αCD40.RBD	MF18	0.00603
ICS IL17	20	NS	Naive	MF1	0.0072
ICS IL17	20	NS	Naive	MF2	0.03315
ICS IL17	20	NS	Naive	MF3	0.01936
ICS IL17	20	NS	Naive	MF4	0.00152
ICS IL17	20	NS	Naive	MF5	0
ICS IL17	20	NS	Naive	MF6	0.01267
ICS IL17	20	PepMix SARS-CoV-2 (S-RBD) 70	Conv.	MF7	0.01393
ICS IL17	20	PepMix SARS-CoV-2 (S-RBD) 70	Conv.	MF8	0
ICS IL17	20	PepMix SARS-CoV-2 (S-RBD) 70	Conv.	MF9	0.00342
ICS IL17	20	PepMix SARS-CoV-2 (S-RBD) 70	αCD40.RBD	MF13	0.0101
ICS IL17	20	PepMix SARS-CoV-2 (S-RBD) 70	Conv.	MF10	0.00771
ICS IL17	20	PepMix SARS-CoV-2 (S-RBD) 70	αCD40.RBD	MF14	0.01518
ICS IL17	20	PepMix SARS-CoV-2 (S-RBD) 70	αCD40.RBD	MF15	0.00497
ICS IL17	20	PepMix SARS-CoV-2 (S-RBD) 70	αCD40.RBD	MF16	0.00356
ICS IL17	20	PepMix SARS-CoV-2 (S-RBD) 70	Conv.	MF11	0.00732
ICS IL17	20	PepMix SARS-CoV-2 (S-RBD) 70	αCD40.RBD	MF17	0.00425
ICS IL17	20	PepMix SARS-CoV-2 (S-RBD) 70	Conv.	MF12	0.00649
ICS IL17	20	PepMix SARS-CoV-2 (S-RBD) 70	αCD40.RBD	MF18	0.00464
ICS IL17	20	PepMix SARS-CoV-2 (S-RBD) 70	Naive	MF1	0.00288
ICS IL17	20	PepMix SARS-CoV-2 (S-RBD) 70	Naive	MF2	0.03976
ICS IL17	20	PepMix SARS-CoV-2 (S-RBD) 70	Naive	MF3	0.01028
ICS IL17	20	PepMix SARS-CoV-2 (S-RBD) 70	Naive	MF4	0.01108
ICS IL17	20	PepMix SARS-CoV-2 (S-RBD) 70	Naive	MF5	0.00422
ICS IL17	20	PepMix SARS-CoV-2 (S-RBD) 70	Naive	MF6	0.01509
ICS IL17	-35	PepMix SARS-CoV-2 (N) 102	Conv.	MF7	0
ICS IL17	-35	PepMix SARS-CoV-2 (N) 102	Conv.	MF8	0.00331
ICS IL17	-35	PepMix SARS-CoV-2 (N) 102	Conv.	MF9	0.00356
ICS IL17	-35	PepMix SARS-CoV-2 (N) 102	αCD40.RBD	MF13	0.00707
ICS IL17	-35	PepMix SARS-CoV-2 (N) 102	Conv.	MF10	0.00175
ICS IL17	-35	PepMix SARS-CoV-2 (N) 102	αCD40.RBD	MF14	0
ICS IL17	-35	PepMix SARS-CoV-2 (N) 102	αCD40.RBD	MF15	0.00117
ICS IL17	-35	PepMix SARS-CoV-2 (N) 102	αCD40.RBD	MF16	0.00623
ICS IL17	-35	PepMix SARS-CoV-2 (N) 102	Conv.	MF11	0.01079
ICS IL17	-35	PepMix SARS-CoV-2 (N) 102	αCD40.RBD	MF17	0.00811
ICS IL17	-35	PepMix SARS-CoV-2 (N) 102	Conv.	MF12	0.00552
ICS IL17	-35	PepMix SARS-CoV-2 (N) 102	αCD40.RBD	MF18	0.00604
ICS IL17	-35	PepMix SARS-CoV-2 (N) 102	Naive	MF1	0.00437
ICS IL17	-35	PepMix SARS-CoV-2 (N) 102	Naive	MF2	0.00716
ICS IL17	-35	PepMix SARS-CoV-2 (N) 102	Naive	MF3	0.0107
ICS IL17	-35	PepMix SARS-CoV-2 (N) 102	Naive	MF4	0.00695
ICS IL17	-35	PepMix SARS-CoV-2 (N) 102	Naive	MF5	0.00655
ICS IL17	-35	PepMix SARS-CoV-2 (N) 102	Naive	MF6	0.00678
ICS IL17	-14	PepMix SARS-CoV-2 (N) 102	Conv.	MF7	ND
ICS IL17	-14	PepMix SARS-CoV-2 (N) 102	Conv.	MF8	0.00356
ICS IL17	-14	PepMix SARS-CoV-2 (N) 102	Conv.	MF9	0
ICS IL17	-14	PepMix SARS-CoV-2 (N) 102	αCD40.RBD	MF13	0.00499
ICS IL17	-14	PepMix SARS-CoV-2 (N) 102	Conv.	MF10	0.00188
ICS IL17	-14	PepMix SARS-CoV-2 (N) 102	αCD40.RBD	MF14	0.0069
ICS IL17	-14	PepMix SARS-CoV-2 (N) 102	αCD40.RBD	MF15	0.00255
ICS IL17	-14	PepMix SARS-CoV-2 (N) 102	αCD40.RBD	MF16	ND
ICS IL17	-14	PepMix SARS-CoV-2 (N) 102	Conv.	MF11	0.00841
ICS IL17	-14	PepMix SARS-CoV-2 (N) 102	αCD40.RBD	MF17	0.00352
ICS IL17	-14	PepMix SARS-CoV-2 (N) 102	Conv.	MF12	0.00133
ICS IL17	-14	PepMix SARS-CoV-2 (N) 102	αCD40.RBD	MF18	0.00343
ICS IL17	-14	PepMix SARS-CoV-2 (N) 102	Naive	MF1	0.00177
ICS IL17	-14	PepMix SARS-CoV-2 (N) 102	Naive	MF2	0
ICS IL17	-14	PepMix SARS-CoV-2 (N) 102	Naive	MF3	0.00996
ICS IL17	-14	PepMix SARS-CoV-2 (N) 102	Naive	MF4	ND
ICS IL17	-14	PepMix SARS-CoV-2 (N) 102	Naive	MF5	0.0043
ICS IL17	-14	PepMix SARS-CoV-2 (N) 102	Naive	MF6	0.00464
ICS IL17	9	PepMix SARS-CoV-2 (N) 102	Conv.	MF7	0.02168
ICS IL17	9	PepMix SARS-CoV-2 (N) 102	Conv.	MF8	0.0156
ICS IL17	9	PepMix SARS-CoV-2 (N) 102	Conv.	MF9	0.00573
ICS IL17	9	PepMix SARS-CoV-2 (N) 102	αCD40.RBD	MF13	0.00182
ICS IL17	9	PepMix SARS-CoV-2 (N) 102	Conv.	MF10	0.01325
ICS IL17	9	PepMix SARS-CoV-2 (N) 102	αCD40.RBD	MF14	0.00528
ICS IL17	9	PepMix SARS-CoV-2 (N) 102	αCD40.RBD	MF15	0.00126
ICS IL17	9	PepMix SARS-CoV-2 (N) 102	αCD40.RBD	MF16	0.01389
ICS IL17	9	PepMix SARS-CoV-2 (N) 102	Conv.	MF11	0.0027
ICS IL17	9	PepMix SARS-CoV-2 (N) 102	αCD40.RBD	MF17	0.01568
ICS IL17	9	PepMix SARS-CoV-2 (N) 102	Conv.	MF12	0.00709
ICS IL17	9	PepMix SARS-CoV-2 (N) 102	αCD40.RBD	MF18	0
ICS IL17	9	PepMix SARS-CoV-2 (N) 102	Naive	MF1	0.03117
ICS IL17	9	PepMix SARS-CoV-2 (N) 102	Naive	MF2	0.06866
ICS IL17	9	PepMix SARS-CoV-2 (N) 102	Naive	MF3	0.03724
ICS IL17	9	PepMix SARS-CoV-2 (N) 102	Naive	MF4	0.00882
ICS IL17	9	PepMix SARS-CoV-2 (N) 102	Naive	MF5	0.02921
ICS IL17	9	PepMix SARS-CoV-2 (N) 102	Naive	MF6	0.00474
ICS IL17	20	PepMix SARS-CoV-2 (N) 102	Conv.	MF7	0.00618
ICS IL17	20	PepMix SARS-CoV-2 (N) 102	Conv.	MF8	0.00484
ICS IL17	20	PepMix SARS-CoV-2 (N) 102	Conv.	MF9	0
ICS IL17	20	PepMix SARS-CoV-2 (N) 102	αCD40.RBD	MF13	0.00629
ICS IL17	20	PepMix SARS-CoV-2 (N) 102	Conv.	MF10	0.02663
ICS IL17	20	PepMix SARS-CoV-2 (N) 102	αCD40.RBD	MF14	0.01204
ICS IL17	20	PepMix SARS-CoV-2 (N) 102	αCD40.RBD	MF15	0.00165
ICS IL17	20	PepMix SARS-CoV-2 (N) 102	αCD40.RBD	MF16	0.01951
ICS IL17	20	PepMix SARS-CoV-2 (N) 102	Conv.	MF11	0.00656
ICS IL17	20	PepMix SARS-CoV-2 (N) 102	αCD40.RBD	MF17	0.01449
ICS IL17	20	PepMix SARS-CoV-2 (N) 102	Conv.	MF12	0.0104
ICS IL17	20	PepMix SARS-CoV-2 (N) 102	αCD40.RBD	MF18	0
ICS IL17	20	PepMix SARS-CoV-2 (N) 102	Naive	MF1	0.01523
ICS IL17	20	PepMix SARS-CoV-2 (N) 102	Naive	MF2	0.04709
ICS IL17	20	PepMix SARS-CoV-2 (N) 102	Naive	MF3	0.02425
ICS IL17	20	PepMix SARS-CoV-2 (N) 102	Naive	MF4	0.01094
ICS IL17	20	PepMix SARS-CoV-2 (N) 102	Naive	MF5	0.01021
ICS IL17	20	PepMix SARS-CoV-2 (N) 102	Naive	MF6	0.01855
ICS IL13	-35	NS	Conv.	MF7	0
ICS IL13	-35	NS	Conv.	MF8	0
ICS IL13	-35	NS	Conv.	MF9	0.00584
ICS IL13	-35	NS	αCD40.RBD	MF13	0.00196
ICS IL13	-35	NS	Conv.	MF10	0.0041
ICS IL13	-35	NS	αCD40.RBD	MF14	0.00143
ICS IL13	-35	NS	αCD40.RBD	MF15	0.00718
ICS IL13	-35	NS	αCD40.RBD	MF16	0.0062
ICS IL13	-35	NS	Conv.	MF11	0.00373
ICS IL13	-35	NS	αCD40.RBD	MF17	0.00612
ICS IL13	-35	NS	Conv.	MF12	0.00798
ICS IL13	-35	NS	αCD40.RBD	MF18	0.00263
ICS IL13	-35	NS	Naive	MF1	0.00156
ICS IL13	-35	NS	Naive	MF2	0.0113
ICS IL13	-35	NS	Naive	MF3	0.0048
ICS IL13	-35	NS	Naive	MF4	0
ICS IL13	-35	NS	Naive	MF5	0.00837
ICS IL13	-35	NS	Naive	MF6	0.00394
ICS IL13	-35	PepMix SARS-CoV-2 (S-RBD) 70	Conv.	MF7	0.00928
ICS IL13	-35	PepMix SARS-CoV-2 (S-RBD) 70	Conv.	MF8	0.00671
ICS IL13	-35	PepMix SARS-CoV-2 (S-RBD) 70	Conv.	MF9	0.0018
ICS IL13	-35	PepMix SARS-CoV-2 (S-RBD) 70	αCD40.RBD	MF13	0
ICS IL13	-35	PepMix SARS-CoV-2 (S-RBD) 70	Conv.	MF10	0
ICS IL13	-35	PepMix SARS-CoV-2 (S-RBD) 70	αCD40.RBD	MF14	0.00281
ICS IL13	-35	PepMix SARS-CoV-2 (S-RBD) 70	αCD40.RBD	MF15	0.00238
ICS IL13	-35	PepMix SARS-CoV-2 (S-RBD) 70	αCD40.RBD	MF16	0.00467
ICS IL13	-35	PepMix SARS-CoV-2 (S-RBD) 70	Conv.	MF11	0.00799
ICS IL13	-35	PepMix SARS-CoV-2 (S-RBD) 70	αCD40.RBD	MF17	0.0051
ICS IL13	-35	PepMix SARS-CoV-2 (S-RBD) 70	Conv.	MF12	0.00277
ICS IL13	-35	PepMix SARS-CoV-2 (S-RBD) 70	αCD40.RBD	MF18	0.00296
ICS IL13	-35	PepMix SARS-CoV-2 (S-RBD) 70	Naive	MF1	0.00149
ICS IL13	-35	PepMix SARS-CoV-2 (S-RBD) 70	Naive	MF2	0.00719
ICS IL13	-35	PepMix SARS-CoV-2 (S-RBD) 70	Naive	MF3	0.00441
ICS IL13	-35	PepMix SARS-CoV-2 (S-RBD) 70	Naive	MF4	0
ICS IL13	-35	PepMix SARS-CoV-2 (S-RBD) 70	Naive	MF5	0.00493
ICS IL13	-35	PepMix SARS-CoV-2 (S-RBD) 70	Naive	MF6	0.00426
ICS IL13	-14	NS	Conv.	MF7	0.00345
ICS IL13	-14	NS	Conv.	MF8	0.00367
ICS IL13	-14	NS	Conv.	MF9	0.0039
ICS IL13	-14	NS	αCD40.RBD	MF13	0.00229
ICS IL13	-14	NS	Conv.	MF10	0.00181
ICS IL13	-14	NS	αCD40.RBD	MF14	0.00817
ICS IL13	-14	NS	αCD40.RBD	MF15	0.00189
ICS IL13	-14	NS	αCD40.RBD	MF16	0.00489
ICS IL13	-14	NS	Conv.	MF11	0.0046
ICS IL13	-14	NS	αCD40.RBD	MF17	0.00352
ICS IL13	-14	NS	Conv.	MF12	0.00568
ICS IL13	-14	NS	αCD40.RBD	MF18	0
ICS IL13	-14	NS	Naive	MF1	0.00156
ICS IL13	-14	NS	Naive	MF2	0.00488
ICS IL13	-14	NS	Naive	MF3	0
ICS IL13	-14	NS	Naive	MF4	ND
ICS IL13	-14	NS	Naive	MF5	0.00238
ICS IL13	-14	NS	Naive	MF6	0.00746
ICS IL13	-14	PepMix SARS-CoV-2 (S-RBD) 70	Conv.	MF7	0
ICS IL13	-14	PepMix SARS-CoV-2 (S-RBD) 70	Conv.	MF8	0
ICS IL13	-14	PepMix SARS-CoV-2 (S-RBD) 70	Conv.	MF9	0
ICS IL13	-14	PepMix SARS-CoV-2 (S-RBD) 70	αCD40.RBD	MF13	0.00231
ICS IL13	-14	PepMix SARS-CoV-2 (S-RBD) 70	Conv.	MF10	0.00568
ICS IL13	-14	PepMix SARS-CoV-2 (S-RBD) 70	αCD40.RBD	MF14	0.01079
ICS IL13	-14	PepMix SARS-CoV-2 (S-RBD) 70	αCD40.RBD	MF15	0.00252
ICS IL13	-14	PepMix SARS-CoV-2 (S-RBD) 70	αCD40.RBD	MF16	0.00349
ICS IL13	-14	PepMix SARS-CoV-2 (S-RBD) 70	Conv.	MF11	0.00187
ICS IL13	-14	PepMix SARS-CoV-2 (S-RBD) 70	αCD40.RBD	MF17	0.00406
ICS IL13	-14	PepMix SARS-CoV-2 (S-RBD) 70	Conv.	MF12	0.00461
ICS IL13	-14	PepMix SARS-CoV-2 (S-RBD) 70	αCD40.RBD	MF18	0.00678
ICS IL13	-14	PepMix SARS-CoV-2 (S-RBD) 70	Naive	MF1	0.00569
ICS IL13	-14	PepMix SARS-CoV-2 (S-RBD) 70	Naive	MF2	0
ICS IL13	-14	PepMix SARS-CoV-2 (S-RBD) 70	Naive	MF3	0.00711
ICS IL13	-14	PepMix SARS-CoV-2 (S-RBD) 70	Naive	MF4	ND
ICS IL13	-14	PepMix SARS-CoV-2 (S-RBD) 70	Naive	MF5	0.00116
ICS IL13	-14	PepMix SARS-CoV-2 (S-RBD) 70	Naive	MF6	0.00663
ICS IL13	9	NS	Conv.	MF7	0.01076
ICS IL13	9	NS	Conv.	MF8	0
ICS IL13	9	NS	Conv.	MF9	0.00385
ICS IL13	9	NS	αCD40.RBD	MF13	0.0036
ICS IL13	9	NS	Conv.	MF10	0.00647
ICS IL13	9	NS	αCD40.RBD	MF14	0
ICS IL13	9	NS	αCD40.RBD	MF15	0.0046
ICS IL13	9	NS	αCD40.RBD	MF16	0
ICS IL13	9	NS	Conv.	MF11	0.00746
ICS IL13	9	NS	αCD40.RBD	MF17	0.01375
ICS IL13	9	NS	Conv.	MF12	0
ICS IL13	9	NS	αCD40.RBD	MF18	0.00803
ICS IL13	9	NS	Naive	MF1	0.0041
ICS IL13	9	NS	Naive	MF2	0.02262
ICS IL13	9	NS	Naive	MF3	0.00915
ICS IL13	9	NS	Naive	MF4	0.0043
ICS IL13	9	NS	Naive	MF5	0.00816
ICS IL13	9	NS	Naive	MF6	0.00354
ICS IL13	9	PepMix SARS-CoV-2 (S-RBD) 70	Conv.	MF7	0
ICS IL13	9	PepMix SARS-CoV-2 (S-RBD) 70	Conv.	MF8	0.01042
ICS IL13	9	PepMix SARS-CoV-2 (S-RBD) 70	Conv.	MF9	0.00219
ICS IL13	9	PepMix SARS-CoV-2 (S-RBD) 70	αCD40.RBD	MF13	0.002
ICS IL13	9	PepMix SARS-CoV-2 (S-RBD) 70	Conv.	MF10	0.01172
ICS IL13	9	PepMix SARS-CoV-2 (S-RBD) 70	αCD40.RBD	MF14	0.00808
ICS IL13	9	PepMix SARS-CoV-2 (S-RBD) 70	αCD40.RBD	MF15	0
ICS IL13	9	PepMix SARS-CoV-2 (S-RBD) 70	αCD40.RBD	MF16	0.00968
ICS IL13	9	PepMix SARS-CoV-2 (S-RBD) 70	Conv.	MF11	0.00587
ICS IL13	9	PepMix SARS-CoV-2 (S-RBD) 70	αCD40.RBD	MF17	0.0042
ICS IL13	9	PepMix SARS-CoV-2 (S-RBD) 70	Conv.	MF12	0.00747
ICS IL13	9	PepMix SARS-CoV-2 (S-RBD) 70	αCD40.RBD	MF18	0
ICS IL13	9	PepMix SARS-CoV-2 (S-RBD) 70	Naive	MF1	0.0039
ICS IL13	9	PepMix SARS-CoV-2 (S-RBD) 70	Naive	MF2	0.0089
ICS IL13	9	PepMix SARS-CoV-2 (S-RBD) 70	Naive	MF3	0.0081
ICS IL13	9	PepMix SARS-CoV-2 (S-RBD) 70	Naive	MF4	0.00506
ICS IL13	9	PepMix SARS-CoV-2 (S-RBD) 70	Naive	MF5	0.00418
ICS IL13	9	PepMix SARS-CoV-2 (S-RBD) 70	Naive	MF6	0.00915
ICS IL13	20	NS	Conv.	MF7	0.01844
ICS IL13	20	NS	Conv.	MF8	0.0043
ICS IL13	20	NS	Conv.	MF9	0.00153
ICS IL13	20	NS	αCD40.RBD	MF13	0.00466
ICS IL13	20	NS	Conv.	MF10	0.00942
ICS IL13	20	NS	αCD40.RBD	MF14	0.00264
ICS IL13	20	NS	αCD40.RBD	MF15	0.00272
ICS IL13	20	NS	αCD40.RBD	MF16	0.00981
ICS IL13	20	NS	Conv.	MF11	0.01271
ICS IL13	20	NS	αCD40.RBD	MF17	0.01201
ICS IL13	20	NS	Conv.	MF12	0.00676
ICS IL13	20	NS	αCD40.RBD	MF18	0.00201
ICS IL13	20	NS	Naive	MF1	0.0024
ICS IL13	20	NS	Naive	MF2	0.02486
ICS IL13	20	NS	Naive	MF3	0.01452
ICS IL13	20	NS	Naive	MF4	0
ICS IL13	20	NS	Naive	MF5	0
ICS IL13	20	NS	Naive	MF6	0.00845
ICS IL13	20	PepMix SARS-CoV-2 (S-RBD) 70	Conv.	MF7	0.01393
ICS IL13	20	PepMix SARS-CoV-2 (S-RBD) 70	Conv.	MF8	0.0054
ICS IL13	20	PepMix SARS-CoV-2 (S-RBD) 70	Conv.	MF9	0.00171
ICS IL13	20	PepMix SARS-CoV-2 (S-RBD) 70	αCD40.RBD	MF13	0.00606
ICS IL13	20	PepMix SARS-CoV-2 (S-RBD) 70	Conv.	MF10	0.00514
ICS IL13	20	PepMix SARS-CoV-2 (S-RBD) 70	αCD40.RBD	MF14	0.00759
ICS IL13	20	PepMix SARS-CoV-2 (S-RBD) 70	αCD40.RBD	MF15	0.00497
ICS IL13	20	PepMix SARS-CoV-2 (S-RBD) 70	αCD40.RBD	MF16	0.00356
ICS IL13	20	PepMix SARS-CoV-2 (S-RBD) 70	Conv.	MF11	0.00183
ICS IL13	20	PepMix SARS-CoV-2 (S-RBD) 70	αCD40.RBD	MF17	0.00425
ICS IL13	20	PepMix SARS-CoV-2 (S-RBD) 70	Conv.	MF12	0.00433
ICS IL13	20	PepMix SARS-CoV-2 (S-RBD) 70	αCD40.RBD	MF18	0.00232
ICS IL13	20	PepMix SARS-CoV-2 (S-RBD) 70	Naive	MF1	0.00288
ICS IL13	20	PepMix SARS-CoV-2 (S-RBD) 70	Naive	MF2	0.03976
ICS IL13	20	PepMix SARS-CoV-2 (S-RBD) 70	Naive	MF3	0.01028
ICS IL13	20	PepMix SARS-CoV-2 (S-RBD) 70	Naive	MF4	0.00738
ICS IL13	20	PepMix SARS-CoV-2 (S-RBD) 70	Naive	MF5	0.00422
ICS IL13	20	PepMix SARS-CoV-2 (S-RBD) 70	Naive	MF6	0.00905
ICS IL13	-35	PepMix SARS-CoV-2 (N) 102	Conv.	MF7	0.00794
ICS IL13	-35	PepMix SARS-CoV-2 (N) 102	Conv.	MF8	0.00331
ICS IL13	-35	PepMix SARS-CoV-2 (N) 102	Conv.	MF9	0.00178
ICS IL13	-35	PepMix SARS-CoV-2 (N) 102	αCD40.RBD	MF13	0.0053
ICS IL13	-35	PepMix SARS-CoV-2 (N) 102	Conv.	MF10	0.00175
ICS IL13	-35	PepMix SARS-CoV-2 (N) 102	αCD40.RBD	MF14	0
ICS IL13	-35	PepMix SARS-CoV-2 (N) 102	αCD40.RBD	MF15	0.00117
ICS IL13	-35	PepMix SARS-CoV-2 (N) 102	αCD40.RBD	MF16	0.00623
ICS IL13	-35	PepMix SARS-CoV-2 (N) 102	Conv.	MF11	0.01079
ICS IL13	-35	PepMix SARS-CoV-2 (N) 102	αCD40.RBD	MF17	0.00579
ICS IL13	-35	PepMix SARS-CoV-2 (N) 102	Conv.	MF12	0.0069
ICS IL13	-35	PepMix SARS-CoV-2 (N) 102	αCD40.RBD	MF18	0.00604
ICS IL13	-35	PepMix SARS-CoV-2 (N) 102	Naive	MF1	0.00437
ICS IL13	-35	PepMix SARS-CoV-2 (N) 102	Naive	MF2	0.00716
ICS IL13	-35	PepMix SARS-CoV-2 (N) 102	Naive	MF3	0.00428
ICS IL13	-35	PepMix SARS-CoV-2 (N) 102	Naive	MF4	0.00695
ICS IL13	-35	PepMix SARS-CoV-2 (N) 102	Naive	MF5	0.00393
ICS IL13	-35	PepMix SARS-CoV-2 (N) 102	Naive	MF6	0.00678
ICS IL13	-14	PepMix SARS-CoV-2 (N) 102	Conv.	MF7	ND
ICS IL13	-14	PepMix SARS-CoV-2 (N) 102	Conv.	MF8	0.00356
ICS IL13	-14	PepMix SARS-CoV-2 (N) 102	Conv.	MF9	0
ICS IL13	-14	PepMix SARS-CoV-2 (N) 102	αCD40.RBD	MF13	0.00374
ICS IL13	-14	PepMix SARS-CoV-2 (N) 102	Conv.	MF10	0.00188
ICS IL13	-14	PepMix SARS-CoV-2 (N) 102	αCD40.RBD	MF14	0.0069
ICS IL13	-14	PepMix SARS-CoV-2 (N) 102	αCD40.RBD	MF15	0.00255
ICS IL13	-14	PepMix SARS-CoV-2 (N) 102	αCD40.RBD	MF16	ND
ICS IL13	-14	PepMix SARS-CoV-2 (N) 102	Conv.	MF11	0.00841
ICS IL13	-14	PepMix SARS-CoV-2 (N) 102	αCD40.RBD	MF17	0.00352
ICS IL13	-14	PepMix SARS-CoV-2 (N) 102	Conv.	MF12	0.00133
ICS IL13	-14	PepMix SARS-CoV-2 (N) 102	αCD40.RBD	MF18	0.00343
ICS IL13	-14	PepMix SARS-CoV-2 (N) 102	Naive	MF1	0.00177
ICS IL13	-14	PepMix SARS-CoV-2 (N) 102	Naive	MF2	0
ICS IL13	-14	PepMix SARS-CoV-2 (N) 102	Naive	MF3	0.0083
ICS IL13	-14	PepMix SARS-CoV-2 (N) 102	Naive	MF4	ND
ICS IL13	-14	PepMix SARS-CoV-2 (N) 102	Naive	MF5	0.00215
ICS IL13	-14	PepMix SARS-CoV-2 (N) 102	Naive	MF6	0.00464
ICS IL13	9	PepMix SARS-CoV-2 (N) 102	Conv.	MF7	0.01084
ICS IL13	9	PepMix SARS-CoV-2 (N) 102	Conv.	MF8	0.0104
ICS IL13	9	PepMix SARS-CoV-2 (N) 102	Conv.	MF9	0.00573
ICS IL13	9	PepMix SARS-CoV-2 (N) 102	αCD40.RBD	MF13	0.00182
ICS IL13	9	PepMix SARS-CoV-2 (N) 102	Conv.	MF10	0.00331
ICS IL13	9	PepMix SARS-CoV-2 (N) 102	αCD40.RBD	MF14	0.00264
ICS IL13	9	PepMix SARS-CoV-2 (N) 102	αCD40.RBD	MF15	0.00126
ICS IL13	9	PepMix SARS-CoV-2 (N) 102	αCD40.RBD	MF16	0.00926
ICS IL13	9	PepMix SARS-CoV-2 (N) 102	Conv.	MF11	0.00405
ICS IL13	9	PepMix SARS-CoV-2 (N) 102	αCD40.RBD	MF17	0.00784
ICS IL13	9	PepMix SARS-CoV-2 (N) 102	Conv.	MF12	0.00709
ICS IL13	9	PepMix SARS-CoV-2 (N) 102	αCD40.RBD	MF18	0
ICS IL13	9	PepMix SARS-CoV-2 (N) 102	Naive	MF1	0.00195
ICS IL13	9	PepMix SARS-CoV-2 (N) 102	Naive	MF2	0.03433
ICS IL13	9	PepMix SARS-CoV-2 (N) 102	Naive	MF3	0.00993
ICS IL13	9	PepMix SARS-CoV-2 (N) 102	Naive	MF4	0.00147
ICS IL13	9	PepMix SARS-CoV-2 (N) 102	Naive	MF5	0.01043
ICS IL13	9	PepMix SARS-CoV-2 (N) 102	Naive	MF6	0.00158
ICS IL13	20	PepMix SARS-CoV-2 (N) 102	Conv.	MF7	0.00618
ICS IL13	20	PepMix SARS-CoV-2 (N) 102	Conv.	MF8	0.00484
ICS IL13	20	PepMix SARS-CoV-2 (N) 102	Conv.	MF9	0
ICS IL13	20	PepMix SARS-CoV-2 (N) 102	αCD40.RBD	MF13	0.00419
ICS IL13	20	PepMix SARS-CoV-2 (N) 102	Conv.	MF10	0.01453
ICS IL13	20	PepMix SARS-CoV-2 (N) 102	αCD40.RBD	MF14	0.00722
ICS IL13	20	PepMix SARS-CoV-2 (N) 102	αCD40.RBD	MF15	0.0033
ICS IL13	20	PepMix SARS-CoV-2 (N) 102	αCD40.RBD	MF16	0.01301
ICS IL13	20	PepMix SARS-CoV-2 (N) 102	Conv.	MF11	0.00492
ICS IL13	20	PepMix SARS-CoV-2 (N) 102	αCD40.RBD	MF17	0.01242
ICS IL13	20	PepMix SARS-CoV-2 (N) 102	Conv.	MF12	0.00694
ICS IL13	20	PepMix SARS-CoV-2 (N) 102	αCD40.RBD	MF18	0
ICS IL13	20	PepMix SARS-CoV-2 (N) 102	Naive	MF1	0.00761
ICS IL13	20	PepMix SARS-CoV-2 (N) 102	Naive	MF2	0.02825
ICS IL13	20	PepMix SARS-CoV-2 (N) 102	Naive	MF3	0.0097
ICS IL13	20	PepMix SARS-CoV-2 (N) 102	Naive	MF4	0.00547
ICS IL13	20	PepMix SARS-CoV-2 (N) 102	Naive	MF5	0.00817
ICS IL13	20	PepMix SARS-CoV-2 (N) 102	Naive	MF6	0.00795
