# Supplementary material for: Modelling the response to vaccine in non-human primates to define SARS-CoV-2 mechanistic correlates of protection
Source: eLife. 2022 Jul 8;11:e75427. doi: 10.7554/eLife.75427 (PMC9282856; doi:10.7554/eLife.75427)
Supplement: Figure 1—source data 9. [file elife-75427-fig1-data9.xlsx]

## Sheet: Feuil1
Figure 1 - figure supplement 4C
Study [Marlin, 2021]
Assay	Day post exposure	Stimulation	Group	Animal ID	Value (SFC by million)
IFNg ELISPOT	-35	PepMix SARS-CoV-2 (S-RBD) 70	Naive	MF6	0
IFNg ELISPOT	-35	PepMix SARS-CoV-2 (N) 102	Naive	MF6	12.5
IFNg ELISPOT	-35	NS	Naive	MF6	7.5
IFNg ELISPOT	-35	PepMix SARS-CoV-2 (S-RBD) 70	Naive	MF5	10
IFNg ELISPOT	-35	PepMix SARS-CoV-2 (N) 102	Naive	MF5	15
IFNg ELISPOT	-35	NS	Naive	MF5	7.5
IFNg ELISPOT	-35	PepMix SARS-CoV-2 (S-RBD) 70	Naive	MF4	2.5
IFNg ELISPOT	-35	PepMix SARS-CoV-2 (N) 102	Naive	MF4	10
IFNg ELISPOT	-35	NS	Naive	MF4	2.5
IFNg ELISPOT	-35	PepMix SARS-CoV-2 (S-RBD) 70	Naive	MF3	0
IFNg ELISPOT	-35	PepMix SARS-CoV-2 (N) 102	Naive	MF3	2.5
IFNg ELISPOT	-35	NS	Naive	MF3	5
IFNg ELISPOT	-35	PepMix SARS-CoV-2 (S-RBD) 70	Naive	MF2	0
IFNg ELISPOT	-35	PepMix SARS-CoV-2 (N) 102	Naive	MF2	7.5
IFNg ELISPOT	-35	NS	Naive	MF2	17.5
IFNg ELISPOT	-35	PepMix SARS-CoV-2 (S-RBD) 70	Naive	MF1	2.5
IFNg ELISPOT	-35	PepMix SARS-CoV-2 (N) 102	Naive	MF1	2.5
IFNg ELISPOT	-35	NS	Naive	MF1	2.5
IFNg ELISPOT	-35	PepMix SARS-CoV-2 (S-RBD) 70	Conv.	MF12	0
IFNg ELISPOT	-35	PepMix SARS-CoV-2 (N) 102	Conv.	MF12	2.5
IFNg ELISPOT	-35	NS	Conv.	MF12	5
IFNg ELISPOT	-35	PepMix SARS-CoV-2 (S-RBD) 70	Conv.	MF11	5
IFNg ELISPOT	-35	PepMix SARS-CoV-2 (N) 102	Conv.	MF11	65
IFNg ELISPOT	-35	NS	Conv.	MF11	5
IFNg ELISPOT	-35	PepMix SARS-CoV-2 (S-RBD) 70	Conv.	MF10	2.5
IFNg ELISPOT	-35	PepMix SARS-CoV-2 (N) 102	Conv.	MF10	2.5
IFNg ELISPOT	-35	NS	Conv.	MF10	7.5
IFNg ELISPOT	-35	PepMix SARS-CoV-2 (S-RBD) 70	Conv.	MF9	2.5
IFNg ELISPOT	-35	PepMix SARS-CoV-2 (N) 102	Conv.	MF9	15
IFNg ELISPOT	-35	NS	Conv.	MF9	0
IFNg ELISPOT	-35	PepMix SARS-CoV-2 (S-RBD) 70	Conv.	MF8	2.5
IFNg ELISPOT	-35	PepMix SARS-CoV-2 (N) 102	Conv.	MF8	32.5
IFNg ELISPOT	-35	NS	Conv.	MF8	0
IFNg ELISPOT	-35	PepMix SARS-CoV-2 (S-RBD) 70	Conv.	MF7	0
IFNg ELISPOT	-35	PepMix SARS-CoV-2 (N) 102	Conv.	MF7	2.5
IFNg ELISPOT	-35	NS	Conv.	MF7	2.5
IFNg ELISPOT	-35	PepMix SARS-CoV-2 (S-RBD) 70	αCD40.RBD	MF18	0
IFNg ELISPOT	-35	PepMix SARS-CoV-2 (N) 102	αCD40.RBD	MF18	12.5
IFNg ELISPOT	-35	NS	αCD40.RBD	MF18	0
IFNg ELISPOT	-35	PepMix SARS-CoV-2 (S-RBD) 70	αCD40.RBD	MF17	2.5
IFNg ELISPOT	-35	PepMix SARS-CoV-2 (N) 102	αCD40.RBD	MF17	37.5
IFNg ELISPOT	-35	NS	αCD40.RBD	MF17	5
IFNg ELISPOT	-35	PepMix SARS-CoV-2 (S-RBD) 70	αCD40.RBD	MF16	0
IFNg ELISPOT	-35	PepMix SARS-CoV-2 (N) 102	αCD40.RBD	MF16	40
IFNg ELISPOT	-35	NS	αCD40.RBD	MF16	27.5
IFNg ELISPOT	-35	PepMix SARS-CoV-2 (S-RBD) 70	αCD40.RBD	MF15	0
IFNg ELISPOT	-35	PepMix SARS-CoV-2 (N) 102	αCD40.RBD	MF15	10
IFNg ELISPOT	-35	NS	αCD40.RBD	MF15	2.5
IFNg ELISPOT	-35	PepMix SARS-CoV-2 (S-RBD) 70	αCD40.RBD	MF14	0
IFNg ELISPOT	-35	PepMix SARS-CoV-2 (N) 102	αCD40.RBD	MF14	57.5
IFNg ELISPOT	-35	NS	αCD40.RBD	MF14	7.5
IFNg ELISPOT	-35	PepMix SARS-CoV-2 (S-RBD) 70	αCD40.RBD	MF13	0
IFNg ELISPOT	-35	PepMix SARS-CoV-2 (N) 102	αCD40.RBD	MF13	25
IFNg ELISPOT	-35	NS	αCD40.RBD	MF13	0
IFNg ELISPOT	-14	PepMix SARS-CoV-2 (S-RBD) 70	Naive	MF6	7.5
IFNg ELISPOT	-14	PepMix SARS-CoV-2 (N) 102	Naive	MF6	12.5
IFNg ELISPOT	-14	NS	Naive	MF6	2.5
IFNg ELISPOT	-14	PepMix SARS-CoV-2 (S-RBD) 70	Naive	MF5	15
IFNg ELISPOT	-14	PepMix SARS-CoV-2 (N) 102	Naive	MF5	27.5
IFNg ELISPOT	-14	NS	Naive	MF5	35
IFNg ELISPOT	-14	PepMix SARS-CoV-2 (S-RBD) 70	Naive	MF4	12.5
IFNg ELISPOT	-14	PepMix SARS-CoV-2 (N) 102	Naive	MF4	15
IFNg ELISPOT	-14	NS	Naive	MF4	5
IFNg ELISPOT	-14	PepMix SARS-CoV-2 (S-RBD) 70	Naive	MF3	0
IFNg ELISPOT	-14	PepMix SARS-CoV-2 (N) 102	Naive	MF3	7.5
IFNg ELISPOT	-14	NS	Naive	MF3	0
IFNg ELISPOT	-14	PepMix SARS-CoV-2 (S-RBD) 70	Naive	MF2	0
IFNg ELISPOT	-14	PepMix SARS-CoV-2 (N) 102	Naive	MF2	2.5
IFNg ELISPOT	-14	NS	Naive	MF2	0
IFNg ELISPOT	-14	PepMix SARS-CoV-2 (S-RBD) 70	Naive	MF1	0
IFNg ELISPOT	-14	PepMix SARS-CoV-2 (N) 102	Naive	MF1	0
IFNg ELISPOT	-14	NS	Naive	MF1	0
IFNg ELISPOT	-14	PepMix SARS-CoV-2 (S-RBD) 70	Conv.	MF12	0
IFNg ELISPOT	-14	PepMix SARS-CoV-2 (N) 102	Conv.	MF12	22.5
IFNg ELISPOT	-14	NS	Conv.	MF12	2.5
IFNg ELISPOT	-14	PepMix SARS-CoV-2 (S-RBD) 70	Conv.	MF11	5
IFNg ELISPOT	-14	PepMix SARS-CoV-2 (N) 102	Conv.	MF11	27.5
IFNg ELISPOT	-14	NS	Conv.	MF11	10
IFNg ELISPOT	-14	PepMix SARS-CoV-2 (S-RBD) 70	Conv.	MF10	2.5
IFNg ELISPOT	-14	PepMix SARS-CoV-2 (N) 102	Conv.	MF10	10
IFNg ELISPOT	-14	NS	Conv.	MF10	7.5
IFNg ELISPOT	-14	PepMix SARS-CoV-2 (S-RBD) 70	Conv.	MF9	2.5
IFNg ELISPOT	-14	PepMix SARS-CoV-2 (N) 102	Conv.	MF9	27.5
IFNg ELISPOT	-14	NS	Conv.	MF9	0
IFNg ELISPOT	-14	PepMix SARS-CoV-2 (S-RBD) 70	Conv.	MF8	0
IFNg ELISPOT	-14	PepMix SARS-CoV-2 (N) 102	Conv.	MF8	10
IFNg ELISPOT	-14	NS	Conv.	MF8	2.5
IFNg ELISPOT	-14	PepMix SARS-CoV-2 (S-RBD) 70	Conv.	MF7	5
IFNg ELISPOT	-14	PepMix SARS-CoV-2 (N) 102	Conv.	MF7	35
IFNg ELISPOT	-14	NS	Conv.	MF7	45
IFNg ELISPOT	-14	PepMix SARS-CoV-2 (S-RBD) 70	αCD40.RBD	MF18	12.5
IFNg ELISPOT	-14	PepMix SARS-CoV-2 (N) 102	αCD40.RBD	MF18	27.5
IFNg ELISPOT	-14	NS	αCD40.RBD	MF18	0
IFNg ELISPOT	-14	PepMix SARS-CoV-2 (S-RBD) 70	αCD40.RBD	MF17	7.5
IFNg ELISPOT	-14	PepMix SARS-CoV-2 (N) 102	αCD40.RBD	MF17	40
IFNg ELISPOT	-14	NS	αCD40.RBD	MF17	2.5
IFNg ELISPOT	-14	PepMix SARS-CoV-2 (S-RBD) 70	αCD40.RBD	MF16	55
IFNg ELISPOT	-14	PepMix SARS-CoV-2 (N) 102	αCD40.RBD	MF16	50
IFNg ELISPOT	-14	NS	αCD40.RBD	MF16	80
IFNg ELISPOT	-14	PepMix SARS-CoV-2 (S-RBD) 70	αCD40.RBD	MF15	15
IFNg ELISPOT	-14	PepMix SARS-CoV-2 (N) 102	αCD40.RBD	MF15	10
IFNg ELISPOT	-14	NS	αCD40.RBD	MF15	5
IFNg ELISPOT	-14	PepMix SARS-CoV-2 (S-RBD) 70	αCD40.RBD	MF14	15
IFNg ELISPOT	-14	PepMix SARS-CoV-2 (N) 102	αCD40.RBD	MF14	50
IFNg ELISPOT	-14	NS	αCD40.RBD	MF14	10
IFNg ELISPOT	-14	PepMix SARS-CoV-2 (S-RBD) 70	αCD40.RBD	MF13	37.5
IFNg ELISPOT	-14	PepMix SARS-CoV-2 (N) 102	αCD40.RBD	MF13	100
IFNg ELISPOT	-14	NS	αCD40.RBD	MF13	2.5
IFNg ELISPOT	0	PepMix SARS-CoV-2 (S-RBD) 70	Naive	MF6	0
IFNg ELISPOT	0	PepMix SARS-CoV-2 (N) 102	Naive	MF6	2.5
IFNg ELISPOT	0	NS	Naive	MF6	2.5
IFNg ELISPOT	0	PepMix SARS-CoV-2 (S-RBD) 70	Naive	MF5	5
IFNg ELISPOT	0	PepMix SARS-CoV-2 (N) 102	Naive	MF5	0
IFNg ELISPOT	0	NS	Naive	MF5	2.5
IFNg ELISPOT	0	PepMix SARS-CoV-2 (S-RBD) 70	Naive	MF4	0
IFNg ELISPOT	0	PepMix SARS-CoV-2 (N) 102	Naive	MF4	5
IFNg ELISPOT	0	NS	Naive	MF4	10
IFNg ELISPOT	0	PepMix SARS-CoV-2 (S-RBD) 70	Naive	MF3	2.5
IFNg ELISPOT	0	PepMix SARS-CoV-2 (N) 102	Naive	MF3	2.5
IFNg ELISPOT	0	NS	Naive	MF3	0
IFNg ELISPOT	0	PepMix SARS-CoV-2 (S-RBD) 70	Naive	MF2	0
IFNg ELISPOT	0	PepMix SARS-CoV-2 (N) 102	Naive	MF2	2.5
IFNg ELISPOT	0	NS	Naive	MF2	0
IFNg ELISPOT	0	PepMix SARS-CoV-2 (S-RBD) 70	Naive	MF1	0
IFNg ELISPOT	0	PepMix SARS-CoV-2 (N) 102	Naive	MF1	0
IFNg ELISPOT	0	NS	Naive	MF1	2.5
IFNg ELISPOT	0	PepMix SARS-CoV-2 (S-RBD) 70	Conv.	MF12	0
IFNg ELISPOT	0	PepMix SARS-CoV-2 (N) 102	Conv.	MF12	0
IFNg ELISPOT	0	NS	Conv.	MF12	0
IFNg ELISPOT	0	PepMix SARS-CoV-2 (S-RBD) 70	Conv.	MF11	0
IFNg ELISPOT	0	PepMix SARS-CoV-2 (N) 102	Conv.	MF11	27.5
IFNg ELISPOT	0	NS	Conv.	MF11	0
IFNg ELISPOT	0	PepMix SARS-CoV-2 (S-RBD) 70	Conv.	MF10	0
IFNg ELISPOT	0	PepMix SARS-CoV-2 (N) 102	Conv.	MF10	2.5
IFNg ELISPOT	0	NS	Conv.	MF10	5
IFNg ELISPOT	0	PepMix SARS-CoV-2 (S-RBD) 70	Conv.	MF9	0
IFNg ELISPOT	0	PepMix SARS-CoV-2 (N) 102	Conv.	MF9	20
IFNg ELISPOT	0	NS	Conv.	MF9	0
IFNg ELISPOT	0	PepMix SARS-CoV-2 (S-RBD) 70	Conv.	MF8	0
IFNg ELISPOT	0	PepMix SARS-CoV-2 (N) 102	Conv.	MF8	17.5
IFNg ELISPOT	0	NS	Conv.	MF8	5
IFNg ELISPOT	0	PepMix SARS-CoV-2 (S-RBD) 70	Conv.	MF7	0
IFNg ELISPOT	0	PepMix SARS-CoV-2 (N) 102	Conv.	MF7	5
IFNg ELISPOT	0	NS	Conv.	MF7	0
IFNg ELISPOT	0	PepMix SARS-CoV-2 (S-RBD) 70	αCD40.RBD	MF18	2.5
IFNg ELISPOT	0	PepMix SARS-CoV-2 (N) 102	αCD40.RBD	MF18	15
IFNg ELISPOT	0	NS	αCD40.RBD	MF18	0
IFNg ELISPOT	0	PepMix SARS-CoV-2 (S-RBD) 70	αCD40.RBD	MF17	2.5
IFNg ELISPOT	0	PepMix SARS-CoV-2 (N) 102	αCD40.RBD	MF17	5
IFNg ELISPOT	0	NS	αCD40.RBD	MF17	2.5
IFNg ELISPOT	0	PepMix SARS-CoV-2 (S-RBD) 70	αCD40.RBD	MF16	5
IFNg ELISPOT	0	PepMix SARS-CoV-2 (N) 102	αCD40.RBD	MF16	12.5
IFNg ELISPOT	0	NS	αCD40.RBD	MF16	0
IFNg ELISPOT	0	PepMix SARS-CoV-2 (S-RBD) 70	αCD40.RBD	MF15	0
IFNg ELISPOT	0	PepMix SARS-CoV-2 (N) 102	αCD40.RBD	MF15	0
IFNg ELISPOT	0	NS	αCD40.RBD	MF15	5
IFNg ELISPOT	0	PepMix SARS-CoV-2 (S-RBD) 70	αCD40.RBD	MF14	10
IFNg ELISPOT	0	PepMix SARS-CoV-2 (N) 102	αCD40.RBD	MF14	17.5
IFNg ELISPOT	0	NS	αCD40.RBD	MF14	0
IFNg ELISPOT	0	PepMix SARS-CoV-2 (S-RBD) 70	αCD40.RBD	MF13	0
IFNg ELISPOT	0	PepMix SARS-CoV-2 (N) 102	αCD40.RBD	MF13	22.5
IFNg ELISPOT	0	NS	αCD40.RBD	MF13	0
IFNg ELISPOT	9	PepMix SARS-CoV-2 (S-RBD) 70	Naive	MF6	142.5
IFNg ELISPOT	9	PepMix SARS-CoV-2 (N) 102	Naive	MF6	597.5
IFNg ELISPOT	9	NS	Naive	MF6	0
IFNg ELISPOT	9	PepMix SARS-CoV-2 (S-RBD) 70	Naive	MF5	142.5
IFNg ELISPOT	9	PepMix SARS-CoV-2 (N) 102	Naive	MF5	1000
IFNg ELISPOT	9	NS	Naive	MF5	0
IFNg ELISPOT	9	PepMix SARS-CoV-2 (S-RBD) 70	Naive	MF4	20
IFNg ELISPOT	9	PepMix SARS-CoV-2 (N) 102	Naive	MF4	282.5
IFNg ELISPOT	9	NS	Naive	MF4	10
IFNg ELISPOT	9	PepMix SARS-CoV-2 (S-RBD) 70	Naive	MF3	12.5
IFNg ELISPOT	9	PepMix SARS-CoV-2 (N) 102	Naive	MF3	225
IFNg ELISPOT	9	NS	Naive	MF3	0
IFNg ELISPOT	9	PepMix SARS-CoV-2 (S-RBD) 70	Naive	MF2	17.5
IFNg ELISPOT	9	PepMix SARS-CoV-2 (N) 102	Naive	MF2	385
IFNg ELISPOT	9	NS	Naive	MF2	7.5
IFNg ELISPOT	9	PepMix SARS-CoV-2 (S-RBD) 70	Naive	MF1	142.5
IFNg ELISPOT	9	PepMix SARS-CoV-2 (N) 102	Naive	MF1	1275
IFNg ELISPOT	9	NS	Naive	MF1	0
IFNg ELISPOT	9	PepMix SARS-CoV-2 (S-RBD) 70	Conv.	MF12	15
IFNg ELISPOT	9	PepMix SARS-CoV-2 (N) 102	Conv.	MF12	320
IFNg ELISPOT	9	NS	Conv.	MF12	10
IFNg ELISPOT	9	PepMix SARS-CoV-2 (S-RBD) 70	Conv.	MF11	5
IFNg ELISPOT	9	PepMix SARS-CoV-2 (N) 102	Conv.	MF11	450
IFNg ELISPOT	9	NS	Conv.	MF11	0
IFNg ELISPOT	9	PepMix SARS-CoV-2 (S-RBD) 70	Conv.	MF10	5
IFNg ELISPOT	9	PepMix SARS-CoV-2 (N) 102	Conv.	MF10	600
IFNg ELISPOT	9	NS	Conv.	MF10	2.5
IFNg ELISPOT	9	PepMix SARS-CoV-2 (S-RBD) 70	Conv.	MF9	45
IFNg ELISPOT	9	PepMix SARS-CoV-2 (N) 102	Conv.	MF9	640
IFNg ELISPOT	9	NS	Conv.	MF9	0
IFNg ELISPOT	9	PepMix SARS-CoV-2 (S-RBD) 70	Conv.	MF8	5
IFNg ELISPOT	9	PepMix SARS-CoV-2 (N) 102	Conv.	MF8	212.5
IFNg ELISPOT	9	NS	Conv.	MF8	10
IFNg ELISPOT	9	PepMix SARS-CoV-2 (S-RBD) 70	Conv.	MF7	5
IFNg ELISPOT	9	PepMix SARS-CoV-2 (N) 102	Conv.	MF7	152.5
IFNg ELISPOT	9	NS	Conv.	MF7	2.5
IFNg ELISPOT	9	PepMix SARS-CoV-2 (S-RBD) 70	αCD40.RBD	MF18	2.5
IFNg ELISPOT	9	PepMix SARS-CoV-2 (N) 102	αCD40.RBD	MF18	35
IFNg ELISPOT	9	NS	αCD40.RBD	MF18	0
IFNg ELISPOT	9	PepMix SARS-CoV-2 (S-RBD) 70	αCD40.RBD	MF17	5
IFNg ELISPOT	9	PepMix SARS-CoV-2 (N) 102	αCD40.RBD	MF17	295
IFNg ELISPOT	9	NS	αCD40.RBD	MF17	7.5
IFNg ELISPOT	9	PepMix SARS-CoV-2 (S-RBD) 70	αCD40.RBD	MF16	12.5
IFNg ELISPOT	9	PepMix SARS-CoV-2 (N) 102	αCD40.RBD	MF16	250
IFNg ELISPOT	9	NS	αCD40.RBD	MF16	7.5
IFNg ELISPOT	9	PepMix SARS-CoV-2 (S-RBD) 70	αCD40.RBD	MF15	0
IFNg ELISPOT	9	PepMix SARS-CoV-2 (N) 102	αCD40.RBD	MF15	132.5
IFNg ELISPOT	9	NS	αCD40.RBD	MF15	2.5
IFNg ELISPOT	9	PepMix SARS-CoV-2 (S-RBD) 70	αCD40.RBD	MF14	2.5
IFNg ELISPOT	9	PepMix SARS-CoV-2 (N) 102	αCD40.RBD	MF14	647.5
IFNg ELISPOT	9	NS	αCD40.RBD	MF14	0
IFNg ELISPOT	9	PepMix SARS-CoV-2 (S-RBD) 70	αCD40.RBD	MF13	0
IFNg ELISPOT	9	PepMix SARS-CoV-2 (N) 102	αCD40.RBD	MF13	175
IFNg ELISPOT	9	NS	αCD40.RBD	MF13	0
