# Supplementary material for: Modelling the response to vaccine in non-human primates to define SARS-CoV-2 mechanistic correlates of protection
Source: eLife. 2022 Jul 8;11:e75427. doi: 10.7554/eLife.75427 (PMC9282856; doi:10.7554/eLife.75427)
Supplement: Figure 1—source data 10. [file elife-75427-fig1-data10.xlsx]

## Sheet: Feuil1
Figure 1 - figure supplement 5
Study [Marlin, 2021]
Assay	Day post exposure	Group	Animal ID	Value (pg/mL)
CCL2	0	Naive	MF1	173
CCL2	0	Naive	MF2	152
CCL2	0	Naive	MF3	243
CCL2	0	Naive	MF4	69
CCL2	0	Naive	MF5	62
CCL2	0	Naive	MF6	122
CCL2	0	Conv.	MF7	213
CCL2	0	Conv.	MF8	64
CCL2	0	Conv.	MF9	131
CCL2	0	Conv.	MF10	246
CCL2	0	Conv.	MF11	198
CCL2	0	Conv.	MF12	114
CCL2	0	αCD40.RBD	MF13	144
CCL2	0	αCD40.RBD	MF14	175
CCL2	0	αCD40.RBD	MF15	233
CCL2	0	αCD40.RBD	MF16	95
CCL2	0	αCD40.RBD	MF17	203
CCL2	0	αCD40.RBD	MF18	175
CCL2	2	Naive	MF1	208
CCL2	2	Naive	MF2	150
CCL2	2	Naive	MF3	267
CCL2	2	Naive	MF4	518
CCL2	2	Naive	MF5	211
CCL2	2	Naive	MF6	140
CCL2	2	Conv.	MF7	161
CCL2	2	Conv.	MF8	64
CCL2	2	Conv.	MF9	98
CCL2	2	Conv.	MF10	112
CCL2	2	Conv.	MF11	102
CCL2	2	Conv.	MF12	83
CCL2	2	αCD40.RBD	MF13	63
CCL2	2	αCD40.RBD	MF14	78
CCL2	2	αCD40.RBD	MF15	72
CCL2	2	αCD40.RBD	MF16	64
CCL2	2	αCD40.RBD	MF17	89
CCL2	2	αCD40.RBD	MF18	133
CCL2	4	Naive	MF1	171
CCL2	4	Naive	MF2	191
CCL2	4	Naive	MF3	259
CCL2	4	Naive	MF4	161
CCL2	4	Naive	MF5	248
CCL2	4	Naive	MF6	197
CCL2	4	Conv.	MF7	275
CCL2	4	Conv.	MF8	112
CCL2	4	Conv.	MF9	180
CCL2	4	Conv.	MF10	218
CCL2	4	Conv.	MF11	159
CCL2	4	Conv.	MF12	139
CCL2	4	αCD40.RBD	MF13	200
CCL2	4	αCD40.RBD	MF14	141
CCL2	4	αCD40.RBD	MF15	155
CCL2	4	αCD40.RBD	MF16	95
CCL2	4	αCD40.RBD	MF17	196
CCL2	4	αCD40.RBD	MF18	158
CCL2	6	Naive	MF1	70
CCL2	6	Naive	MF2	63
CCL2	6	Naive	MF3	108
CCL2	6	Naive	MF4	56
CCL2	6	Naive	MF5	75
CCL2	6	Naive	MF6	129
CCL2	6	Conv.	MF7	203
CCL2	6	Conv.	MF8	181
CCL2	6	Conv.	MF9	104
CCL2	6	Conv.	MF10	112
CCL2	6	Conv.	MF11	282
CCL2	6	Conv.	MF12	40
CCL2	6	αCD40.RBD	MF13	85
CCL2	6	αCD40.RBD	MF14	76
CCL2	6	αCD40.RBD	MF15	92
CCL2	6	αCD40.RBD	MF16	48
CCL2	6	αCD40.RBD	MF17	101
CCL2	6	αCD40.RBD	MF18	72
IL-1RA	0	Naive	MF1	29
IL-1RA	0	Naive	MF2	52
IL-1RA	0	Naive	MF3	42
IL-1RA	0	Naive	MF4	31
IL-1RA	0	Naive	MF5	8
IL-1RA	0	Naive	MF6	14
IL-1RA	0	Conv.	MF7	23
IL-1RA	0	Conv.	MF8	11
IL-1RA	0	Conv.	MF9	10
IL-1RA	0	Conv.	MF10	21
IL-1RA	0	Conv.	MF11	8
IL-1RA	0	Conv.	MF12	52
IL-1RA	0	αCD40.RBD	MF13	14
IL-1RA	0	αCD40.RBD	MF14	30
IL-1RA	0	αCD40.RBD	MF15	26
IL-1RA	0	αCD40.RBD	MF16	37
IL-1RA	0	αCD40.RBD	MF17	72
IL-1RA	0	αCD40.RBD	MF18	31
IL-1RA	2	Naive	MF1	169
IL-1RA	2	Naive	MF2	87
IL-1RA	2	Naive	MF3	227
IL-1RA	2	Naive	MF4	155
IL-1RA	2	Naive	MF5	79
IL-1RA	2	Naive	MF6	154
IL-1RA	2	Conv.	MF7	4
IL-1RA	2	Conv.	MF8	15
IL-1RA	2	Conv.	MF9	12
IL-1RA	2	Conv.	MF10	9
IL-1RA	2	Conv.	MF11	0
IL-1RA	2	Conv.	MF12	25
IL-1RA	2	αCD40.RBD	MF13	0
IL-1RA	2	αCD40.RBD	MF14	4
IL-1RA	2	αCD40.RBD	MF15	6
IL-1RA	2	αCD40.RBD	MF16	18
IL-1RA	2	αCD40.RBD	MF17	8
IL-1RA	2	αCD40.RBD	MF18	14
IL-1RA	4	Naive	MF1	15
IL-1RA	4	Naive	MF2	25
IL-1RA	4	Naive	MF3	28
IL-1RA	4	Naive	MF4	30
IL-1RA	4	Naive	MF5	28
IL-1RA	4	Naive	MF6	31
IL-1RA	4	Conv.	MF7	21
IL-1RA	4	Conv.	MF8	23
IL-1RA	4	Conv.	MF9	15
IL-1RA	4	Conv.	MF10	12
IL-1RA	4	Conv.	MF11	0
IL-1RA	4	Conv.	MF12	32
IL-1RA	4	αCD40.RBD	MF13	0
IL-1RA	4	αCD40.RBD	MF14	7
IL-1RA	4	αCD40.RBD	MF15	23
IL-1RA	4	αCD40.RBD	MF16	15
IL-1RA	4	αCD40.RBD	MF17	0
IL-1RA	4	αCD40.RBD	MF18	21
IL-1RA	6	Naive	MF1	0
IL-1RA	6	Naive	MF2	0
IL-1RA	6	Naive	MF3	13
IL-1RA	6	Naive	MF4	0
IL-1RA	6	Naive	MF5	0
IL-1RA	6	Naive	MF6	11
IL-1RA	6	Conv.	MF7	0
IL-1RA	6	Conv.	MF8	18
IL-1RA	6	Conv.	MF9	0
IL-1RA	6	Conv.	MF10	0
IL-1RA	6	Conv.	MF11	8
IL-1RA	6	Conv.	MF12	0
IL-1RA	6	αCD40.RBD	MF13	0
IL-1RA	6	αCD40.RBD	MF14	0
IL-1RA	6	αCD40.RBD	MF15	0
IL-1RA	6	αCD40.RBD	MF16	0
IL-1RA	6	αCD40.RBD	MF17	0
IL-1RA	6	αCD40.RBD	MF18	0
IL-2	0	Naive	MF1	3
IL-2	0	Naive	MF2	4
IL-2	0	Naive	MF3	12
IL-2	0	Naive	MF4	0
IL-2	0	Naive	MF5	0
IL-2	0	Naive	MF6	3
IL-2	0	Conv.	MF7	9
IL-2	0	Conv.	MF8	0
IL-2	0	Conv.	MF9	0
IL-2	0	Conv.	MF10	6
IL-2	0	Conv.	MF11	6
IL-2	0	Conv.	MF12	2
IL-2	0	αCD40.RBD	MF13	3
IL-2	0	αCD40.RBD	MF14	2
IL-2	0	αCD40.RBD	MF15	3
IL-2	0	αCD40.RBD	MF16	2
IL-2	0	αCD40.RBD	MF17	5
IL-2	0	αCD40.RBD	MF18	4
IL-2	2	Naive	MF1	0
IL-2	2	Naive	MF2	0
IL-2	2	Naive	MF3	4
IL-2	2	Naive	MF4	2
IL-2	2	Naive	MF5	0
IL-2	2	Naive	MF6	0
IL-2	2	Conv.	MF7	0
IL-2	2	Conv.	MF8	0
IL-2	2	Conv.	MF9	0
IL-2	2	Conv.	MF10	0
IL-2	2	Conv.	MF11	0
IL-2	2	Conv.	MF12	0
IL-2	2	αCD40.RBD	MF13	0
IL-2	2	αCD40.RBD	MF14	0
IL-2	2	αCD40.RBD	MF15	0
IL-2	2	αCD40.RBD	MF16	0
IL-2	2	αCD40.RBD	MF17	0
IL-2	2	αCD40.RBD	MF18	0
IL-2	4	Naive	MF1	7
IL-2	4	Naive	MF2	0
IL-2	4	Naive	MF3	26
IL-2	4	Naive	MF4	0
IL-2	4	Naive	MF5	4
IL-2	4	Naive	MF6	0
IL-2	4	Conv.	MF7	15
IL-2	4	Conv.	MF8	12
IL-2	4	Conv.	MF9	10
IL-2	4	Conv.	MF10	0
IL-2	4	Conv.	MF11	0
IL-2	4	Conv.	MF12	0
IL-2	4	αCD40.RBD	MF13	6
IL-2	4	αCD40.RBD	MF14	0
IL-2	4	αCD40.RBD	MF15	0
IL-2	4	αCD40.RBD	MF16	0
IL-2	4	αCD40.RBD	MF17	0
IL-2	4	αCD40.RBD	MF18	0
IL-2	6	Naive	MF1	0
IL-2	6	Naive	MF2	0
IL-2	6	Naive	MF3	0
IL-2	6	Naive	MF4	0
IL-2	6	Naive	MF5	0
IL-2	6	Naive	MF6	0
IL-2	6	Conv.	MF7	0
IL-2	6	Conv.	MF8	0
IL-2	6	Conv.	MF9	0
IL-2	6	Conv.	MF10	0
IL-2	6	Conv.	MF11	0
IL-2	6	Conv.	MF12	0
IL-2	6	αCD40.RBD	MF13	0
IL-2	6	αCD40.RBD	MF14	0
IL-2	6	αCD40.RBD	MF15	0
IL-2	6	αCD40.RBD	MF16	0
IL-2	6	αCD40.RBD	MF17	0
IL-2	6	αCD40.RBD	MF18	0
IL-8	0	Naive	MF1	35
IL-8	0	Naive	MF2	32
IL-8	0	Naive	MF3	96
IL-8	0	Naive	MF4	21
IL-8	0	Naive	MF5	18
IL-8	0	Naive	MF6	123
IL-8	0	Conv.	MF7	51
IL-8	0	Conv.	MF8	15
IL-8	0	Conv.	MF9	17
IL-8	0	Conv.	MF10	26
IL-8	0	Conv.	MF11	117
IL-8	0	Conv.	MF12	28
IL-8	0	αCD40.RBD	MF13	51
IL-8	0	αCD40.RBD	MF14	30
IL-8	0	αCD40.RBD	MF15	61
IL-8	0	αCD40.RBD	MF16	137
IL-8	0	αCD40.RBD	MF17	425
IL-8	0	αCD40.RBD	MF18	36
IL-8	2	Naive	MF1	63
IL-8	2	Naive	MF2	18
IL-8	2	Naive	MF3	45
IL-8	2	Naive	MF4	459
IL-8	2	Naive	MF5	44
IL-8	2	Naive	MF6	95
IL-8	2	Conv.	MF7	22
IL-8	2	Conv.	MF8	12
IL-8	2	Conv.	MF9	7
IL-8	2	Conv.	MF10	12
IL-8	2	Conv.	MF11	13
IL-8	2	Conv.	MF12	11
IL-8	2	αCD40.RBD	MF13	11
IL-8	2	αCD40.RBD	MF14	7
IL-8	2	αCD40.RBD	MF15	22
IL-8	2	αCD40.RBD	MF16	13
IL-8	2	αCD40.RBD	MF17	109
IL-8	2	αCD40.RBD	MF18	53
IL-8	4	Naive	MF1	26
IL-8	4	Naive	MF2	40
IL-8	4	Naive	MF3	439
IL-8	4	Naive	MF4	74
IL-8	4	Naive	MF5	66
IL-8	4	Naive	MF6	47
IL-8	4	Conv.	MF7	54
IL-8	4	Conv.	MF8	33
IL-8	4	Conv.	MF9	21
IL-8	4	Conv.	MF10	26
IL-8	4	Conv.	MF11	46
IL-8	4	Conv.	MF12	45
IL-8	4	αCD40.RBD	MF13	61
IL-8	4	αCD40.RBD	MF14	35
IL-8	4	αCD40.RBD	MF15	27
IL-8	4	αCD40.RBD	MF16	30
IL-8	4	αCD40.RBD	MF17	77
IL-8	4	αCD40.RBD	MF18	117
IL-8	6	Naive	MF1	12
IL-8	6	Naive	MF2	16
IL-8	6	Naive	MF3	81
IL-8	6	Naive	MF4	18
IL-8	6	Naive	MF5	38
IL-8	6	Naive	MF6	20
IL-8	6	Conv.	MF7	36
IL-8	6	Conv.	MF8	39
IL-8	6	Conv.	MF9	9
IL-8	6	Conv.	MF10	12
IL-8	6	Conv.	MF11	39
IL-8	6	Conv.	MF12	7
IL-8	6	αCD40.RBD	MF13	31
IL-8	6	αCD40.RBD	MF14	11
IL-8	6	αCD40.RBD	MF15	13
IL-8	6	αCD40.RBD	MF16	15
IL-8	6	αCD40.RBD	MF17	40
IL-8	6	αCD40.RBD	MF18	41
sCD40L	0	Naive	MF1	275
sCD40L	0	Naive	MF2	545
sCD40L	0	Naive	MF3	129
sCD40L	0	Naive	MF4	125
sCD40L	0	Naive	MF5	0
sCD40L	0	Naive	MF6	302
sCD40L	0	Conv.	MF7	313
sCD40L	0	Conv.	MF8	22
sCD40L	0	Conv.	MF9	56
sCD40L	0	Conv.	MF10	360
sCD40L	0	Conv.	MF11	538
sCD40L	0	Conv.	MF12	60
sCD40L	0	αCD40.RBD	MF13	250
sCD40L	0	αCD40.RBD	MF14	527
sCD40L	0	αCD40.RBD	MF15	302
sCD40L	0	αCD40.RBD	MF16	35
sCD40L	0	αCD40.RBD	MF17	1903
sCD40L	0	αCD40.RBD	MF18	334
sCD40L	2	Naive	MF1	46
sCD40L	2	Naive	MF2	20
sCD40L	2	Naive	MF3	0
sCD40L	2	Naive	MF4	1375
sCD40L	2	Naive	MF5	137
sCD40L	2	Naive	MF6	0
sCD40L	2	Conv.	MF7	97
sCD40L	2	Conv.	MF8	40
sCD40L	2	Conv.	MF9	0
sCD40L	2	Conv.	MF10	0
sCD40L	2	Conv.	MF11	9
sCD40L	2	Conv.	MF12	0
sCD40L	2	αCD40.RBD	MF13	0
sCD40L	2	αCD40.RBD	MF14	0
sCD40L	2	αCD40.RBD	MF15	0
sCD40L	2	αCD40.RBD	MF16	0
sCD40L	2	αCD40.RBD	MF17	0
sCD40L	2	αCD40.RBD	MF18	56
sCD40L	4	Naive	MF1	31
sCD40L	4	Naive	MF2	72
sCD40L	4	Naive	MF3	168
sCD40L	4	Naive	MF4	184
sCD40L	4	Naive	MF5	86
sCD40L	4	Naive	MF6	24
sCD40L	4	Conv.	MF7	194
sCD40L	4	Conv.	MF8	123
sCD40L	4	Conv.	MF9	82
sCD40L	4	Conv.	MF10	61
sCD40L	4	Conv.	MF11	54
sCD40L	4	Conv.	MF12	86
sCD40L	4	αCD40.RBD	MF13	155
sCD40L	4	αCD40.RBD	MF14	2
sCD40L	4	αCD40.RBD	MF15	27
sCD40L	4	αCD40.RBD	MF16	24
sCD40L	4	αCD40.RBD	MF17	175
sCD40L	4	αCD40.RBD	MF18	47
sCD40L	6	Naive	MF1	0
sCD40L	6	Naive	MF2	0
sCD40L	6	Naive	MF3	0
sCD40L	6	Naive	MF4	0
sCD40L	6	Naive	MF5	0
sCD40L	6	Naive	MF6	15
sCD40L	6	Conv.	MF7	103
sCD40L	6	Conv.	MF8	315
sCD40L	6	Conv.	MF9	0
sCD40L	6	Conv.	MF10	0
sCD40L	6	Conv.	MF11	572
sCD40L	6	Conv.	MF12	0
sCD40L	6	αCD40.RBD	MF13	0
sCD40L	6	αCD40.RBD	MF14	0
sCD40L	6	αCD40.RBD	MF15	0
sCD40L	6	αCD40.RBD	MF16	0
sCD40L	6	αCD40.RBD	MF17	109
sCD40L	6	αCD40.RBD	MF18	15
IL-10	0	Naive	MF1	4
IL-10	0	Naive	MF2	28
IL-10	0	Naive	MF3	84
IL-10	0	Naive	MF4	20
IL-10	0	Naive	MF5	0
IL-10	0	Naive	MF6	1
IL-10	0	Conv.	MF7	50
IL-10	0	Conv.	MF8	0
IL-10	0	Conv.	MF9	0
IL-10	0	Conv.	MF10	121
IL-10	0	Conv.	MF11	28
IL-10	0	Conv.	MF12	18
IL-10	0	αCD40.RBD	MF13	10
IL-10	0	αCD40.RBD	MF14	79
IL-10	0	αCD40.RBD	MF15	44
IL-10	0	αCD40.RBD	MF16	14
IL-10	0	αCD40.RBD	MF17	11
IL-10	0	αCD40.RBD	MF18	31
IL-10	2	Naive	MF1	0
IL-10	2	Naive	MF2	0
IL-10	2	Naive	MF3	40
IL-10	2	Naive	MF4	13
IL-10	2	Naive	MF5	0
IL-10	2	Naive	MF6	0
IL-10	2	Conv.	MF7	0
IL-10	2	Conv.	MF8	0
IL-10	2	Conv.	MF9	0
IL-10	2	Conv.	MF10	35
IL-10	2	Conv.	MF11	0
IL-10	2	Conv.	MF12	1
IL-10	2	αCD40.RBD	MF13	0
IL-10	2	αCD40.RBD	MF14	0
IL-10	2	αCD40.RBD	MF15	0
IL-10	2	αCD40.RBD	MF16	0
IL-10	2	αCD40.RBD	MF17	0
IL-10	2	αCD40.RBD	MF18	3
IL-10	4	Naive	MF1	0
IL-10	4	Naive	MF2	0
IL-10	4	Naive	MF3	102
IL-10	4	Naive	MF4	26
IL-10	4	Naive	MF5	16
IL-10	4	Naive	MF6	0
IL-10	4	Conv.	MF7	55
IL-10	4	Conv.	MF8	33
IL-10	4	Conv.	MF9	0
IL-10	4	Conv.	MF10	120
IL-10	4	Conv.	MF11	0
IL-10	4	Conv.	MF12	33
IL-10	4	αCD40.RBD	MF13	22
IL-10	4	αCD40.RBD	MF14	16
IL-10	4	αCD40.RBD	MF15	1
IL-10	4	αCD40.RBD	MF16	0
IL-10	4	αCD40.RBD	MF17	0
IL-10	4	αCD40.RBD	MF18	26
IL-10	6	Naive	MF1	0
IL-10	6	Naive	MF2	0
IL-10	6	Naive	MF3	0
IL-10	6	Naive	MF4	0
IL-10	6	Naive	MF5	0
IL-10	6	Naive	MF6	0
IL-10	6	Conv.	MF7	0
IL-10	6	Conv.	MF8	0
IL-10	6	Conv.	MF9	0
IL-10	6	Conv.	MF10	43
IL-10	6	Conv.	MF11	54
IL-10	6	Conv.	MF12	0
IL-10	6	αCD40.RBD	MF13	0
IL-10	6	αCD40.RBD	MF14	0
IL-10	6	αCD40.RBD	MF15	0
IL-10	6	αCD40.RBD	MF16	0
IL-10	6	αCD40.RBD	MF17	0
IL-10	6	αCD40.RBD	MF18	0
VEGF	0	Naive	MF1	49
VEGF	0	Naive	MF2	12
VEGF	0	Naive	MF3	34
VEGF	0	Naive	MF4	0
VEGF	0	Naive	MF5	0
VEGF	0	Naive	MF6	0
VEGF	0	Conv.	MF7	33
VEGF	0	Conv.	MF8	0
VEGF	0	Conv.	MF9	0
VEGF	0	Conv.	MF10	59
VEGF	0	Conv.	MF11	22
VEGF	0	Conv.	MF12	15
VEGF	0	αCD40.RBD	MF13	4
VEGF	0	αCD40.RBD	MF14	0
VEGF	0	αCD40.RBD	MF15	0
VEGF	0	αCD40.RBD	MF16	16
VEGF	0	αCD40.RBD	MF17	17
VEGF	0	αCD40.RBD	MF18	24
VEGF	2	Naive	MF1	0
VEGF	2	Naive	MF2	0
VEGF	2	Naive	MF3	0
VEGF	2	Naive	MF4	8
VEGF	2	Naive	MF5	0
VEGF	2	Naive	MF6	0
VEGF	2	Conv.	MF7	0
VEGF	2	Conv.	MF8	0
VEGF	2	Conv.	MF9	0
VEGF	2	Conv.	MF10	0
VEGF	2	Conv.	MF11	0
VEGF	2	Conv.	MF12	0
VEGF	2	αCD40.RBD	MF13	0
VEGF	2	αCD40.RBD	MF14	0
VEGF	2	αCD40.RBD	MF15	0
VEGF	2	αCD40.RBD	MF16	0
VEGF	2	αCD40.RBD	MF17	0
VEGF	2	αCD40.RBD	MF18	0
VEGF	4	Naive	MF1	21
VEGF	4	Naive	MF2	0
VEGF	4	Naive	MF3	50
VEGF	4	Naive	MF4	0
VEGF	4	Naive	MF5	16
VEGF	4	Naive	MF6	0
VEGF	4	Conv.	MF7	50
VEGF	4	Conv.	MF8	50
VEGF	4	Conv.	MF9	45
VEGF	4	Conv.	MF10	21
VEGF	4	Conv.	MF11	0
VEGF	4	Conv.	MF12	0
VEGF	4	αCD40.RBD	MF13	26
VEGF	4	αCD40.RBD	MF14	0
VEGF	4	αCD40.RBD	MF15	0
VEGF	4	αCD40.RBD	MF16	0
VEGF	4	αCD40.RBD	MF17	0
VEGF	4	αCD40.RBD	MF18	0
VEGF	6	Naive	MF1	0
VEGF	6	Naive	MF2	0
VEGF	6	Naive	MF3	0
VEGF	6	Naive	MF4	0
VEGF	6	Naive	MF5	0
VEGF	6	Naive	MF6	0
VEGF	6	Conv.	MF7	0
VEGF	6	Conv.	MF8	0
VEGF	6	Conv.	MF9	0
VEGF	6	Conv.	MF10	0
VEGF	6	Conv.	MF11	0
VEGF	6	Conv.	MF12	0
VEGF	6	αCD40.RBD	MF13	0
VEGF	6	αCD40.RBD	MF14	0
VEGF	6	αCD40.RBD	MF15	0
VEGF	6	αCD40.RBD	MF16	0
VEGF	6	αCD40.RBD	MF17	0
VEGF	6	αCD40.RBD	MF18	0
IFNg	0	Naive	MF1	3
IFNg	0	Naive	MF2	1
IFNg	0	Naive	MF3	5
IFNg	0	Naive	MF4	0
IFNg	0	Naive	MF5	0
IFNg	0	Naive	MF6	2
IFNg	0	Conv.	MF7	8
IFNg	0	Conv.	MF8	0
IFNg	0	Conv.	MF9	0
IFNg	0	Conv.	MF10	14
IFNg	0	Conv.	MF11	3
IFNg	0	Conv.	MF12	28
IFNg	0	αCD40.RBD	MF13	3
IFNg	0	αCD40.RBD	MF14	0
IFNg	0	αCD40.RBD	MF15	3
IFNg	0	αCD40.RBD	MF16	1
IFNg	0	αCD40.RBD	MF17	2
IFNg	0	αCD40.RBD	MF18	7
IFNg	2	Naive	MF1	0
IFNg	2	Naive	MF2	0
IFNg	2	Naive	MF3	0
IFNg	2	Naive	MF4	2
IFNg	2	Naive	MF5	0
IFNg	2	Naive	MF6	0
IFNg	2	Conv.	MF7	0
IFNg	2	Conv.	MF8	0
IFNg	2	Conv.	MF9	0
IFNg	2	Conv.	MF10	3
IFNg	2	Conv.	MF11	0
IFNg	2	Conv.	MF12	6
IFNg	2	αCD40.RBD	MF13	0
IFNg	2	αCD40.RBD	MF14	0
IFNg	2	αCD40.RBD	MF15	0
IFNg	2	αCD40.RBD	MF16	0
IFNg	2	αCD40.RBD	MF17	0
IFNg	2	αCD40.RBD	MF18	3
IFNg	4	Naive	MF1	2
IFNg	4	Naive	MF2	3
IFNg	4	Naive	MF3	9
IFNg	4	Naive	MF4	4
IFNg	4	Naive	MF5	3
IFNg	4	Naive	MF6	3
IFNg	4	Conv.	MF7	15
IFNg	4	Conv.	MF8	4
IFNg	4	Conv.	MF9	4
IFNg	4	Conv.	MF10	12
IFNg	4	Conv.	MF11	3
IFNg	4	Conv.	MF12	5
IFNg	4	αCD40.RBD	MF13	8
IFNg	4	αCD40.RBD	MF14	2
IFNg	4	αCD40.RBD	MF15	2
IFNg	4	αCD40.RBD	MF16	2
IFNg	4	αCD40.RBD	MF17	3
IFNg	4	αCD40.RBD	MF18	6
IFNg	6	Naive	MF1	0
IFNg	6	Naive	MF2	0
IFNg	6	Naive	MF3	0
IFNg	6	Naive	MF4	0
IFNg	6	Naive	MF5	0
IFNg	6	Naive	MF6	0
IFNg	6	Conv.	MF7	6
IFNg	6	Conv.	MF8	2
IFNg	6	Conv.	MF9	0
IFNg	6	Conv.	MF10	1
IFNg	6	Conv.	MF11	6
IFNg	6	Conv.	MF12	0
IFNg	6	αCD40.RBD	MF13	0
IFNg	6	αCD40.RBD	MF14	0
IFNg	6	αCD40.RBD	MF15	0
IFNg	6	αCD40.RBD	MF16	0
IFNg	6	αCD40.RBD	MF17	0
IFNg	6	αCD40.RBD	MF18	0
TNFa	0	Naive	MF1	42
TNFa	0	Naive	MF2	12
TNFa	0	Naive	MF3	34
TNFa	0	Naive	MF4	0
TNFa	0	Naive	MF5	0
TNFa	0	Naive	MF6	0
TNFa	0	Conv.	MF7	32
TNFa	0	Conv.	MF8	0
TNFa	0	Conv.	MF9	0
TNFa	0	Conv.	MF10	21
TNFa	0	Conv.	MF11	17
TNFa	0	Conv.	MF12	0
TNFa	0	αCD40.RBD	MF13	10
TNFa	0	αCD40.RBD	MF14	0
TNFa	0	αCD40.RBD	MF15	19
TNFa	0	αCD40.RBD	MF16	0
TNFa	0	αCD40.RBD	MF17	0
TNFa	0	αCD40.RBD	MF18	30
TNFa	2	Naive	MF1	0
TNFa	2	Naive	MF2	0
TNFa	2	Naive	MF3	0
TNFa	2	Naive	MF4	0
TNFa	2	Naive	MF5	0
TNFa	2	Naive	MF6	0
TNFa	2	Conv.	MF7	0
TNFa	2	Conv.	MF8	0
TNFa	2	Conv.	MF9	0
TNFa	2	Conv.	MF10	0
TNFa	2	Conv.	MF11	0
TNFa	2	Conv.	MF12	0
TNFa	2	αCD40.RBD	MF13	0
TNFa	2	αCD40.RBD	MF14	0
TNFa	2	αCD40.RBD	MF15	0
TNFa	2	αCD40.RBD	MF16	0
TNFa	2	αCD40.RBD	MF17	0
TNFa	2	αCD40.RBD	MF18	4
TNFa	4	Naive	MF1	44
TNFa	4	Naive	MF2	14
TNFa	4	Naive	MF3	36
TNFa	4	Naive	MF4	14
TNFa	4	Naive	MF5	23
TNFa	4	Naive	MF6	5
TNFa	4	Conv.	MF7	58
TNFa	4	Conv.	MF8	49
TNFa	4	Conv.	MF9	15
TNFa	4	Conv.	MF10	42
TNFa	4	Conv.	MF11	19
TNFa	4	Conv.	MF12	35
TNFa	4	αCD40.RBD	MF13	37
TNFa	4	αCD40.RBD	MF14	14
TNFa	4	αCD40.RBD	MF15	0
TNFa	4	αCD40.RBD	MF16	5
TNFa	4	αCD40.RBD	MF17	8
TNFa	4	αCD40.RBD	MF18	19
TNFa	6	Naive	MF1	0
TNFa	6	Naive	MF2	0
TNFa	6	Naive	MF3	0
TNFa	6	Naive	MF4	0
TNFa	6	Naive	MF5	0
TNFa	6	Naive	MF6	15
TNFa	6	Conv.	MF7	3
TNFa	6	Conv.	MF8	3
TNFa	6	Conv.	MF9	0
TNFa	6	Conv.	MF10	0
TNFa	6	Conv.	MF11	35
TNFa	6	Conv.	MF12	0
TNFa	6	αCD40.RBD	MF13	0
TNFa	6	αCD40.RBD	MF14	0
TNFa	6	αCD40.RBD	MF15	0
TNFa	6	αCD40.RBD	MF16	0
TNFa	6	αCD40.RBD	MF17	0
TNFa	6	αCD40.RBD	MF18	0
IL-12 (p40)	0	Naive	MF1	9
IL-12 (p40)	0	Naive	MF2	2
IL-12 (p40)	0	Naive	MF3	47
IL-12 (p40)	0	Naive	MF4	4
IL-12 (p40)	0	Naive	MF5	0
IL-12 (p40)	0	Naive	MF6	0
IL-12 (p40)	0	Conv.	MF7	35
IL-12 (p40)	0	Conv.	MF8	0
IL-12 (p40)	0	Conv.	MF9	0
IL-12 (p40)	0	Conv.	MF10	18
IL-12 (p40)	0	Conv.	MF11	6
IL-12 (p40)	0	Conv.	MF12	31
IL-12 (p40)	0	αCD40.RBD	MF13	0
IL-12 (p40)	0	αCD40.RBD	MF14	1
IL-12 (p40)	0	αCD40.RBD	MF15	7
IL-12 (p40)	0	αCD40.RBD	MF16	3
IL-12 (p40)	0	αCD40.RBD	MF17	16
IL-12 (p40)	0	αCD40.RBD	MF18	7
IL-12 (p40)	2	Naive	MF1	0
IL-12 (p40)	2	Naive	MF2	0
IL-12 (p40)	2	Naive	MF3	17
IL-12 (p40)	2	Naive	MF4	10
IL-12 (p40)	2	Naive	MF5	0
IL-12 (p40)	2	Naive	MF6	0
IL-12 (p40)	2	Conv.	MF7	3
IL-12 (p40)	2	Conv.	MF8	0
IL-12 (p40)	2	Conv.	MF9	0
IL-12 (p40)	2	Conv.	MF10	0
IL-12 (p40)	2	Conv.	MF11	0
IL-12 (p40)	2	Conv.	MF12	13
IL-12 (p40)	2	αCD40.RBD	MF13	0
IL-12 (p40)	2	αCD40.RBD	MF14	0
IL-12 (p40)	2	αCD40.RBD	MF15	0
IL-12 (p40)	2	αCD40.RBD	MF16	0
IL-12 (p40)	2	αCD40.RBD	MF17	0
IL-12 (p40)	2	αCD40.RBD	MF18	0
IL-12 (p40)	4	Naive	MF1	1
IL-12 (p40)	4	Naive	MF2	0
IL-12 (p40)	4	Naive	MF3	19
IL-12 (p40)	4	Naive	MF4	10
IL-12 (p40)	4	Naive	MF5	5
IL-12 (p40)	4	Naive	MF6	0
IL-12 (p40)	4	Conv.	MF7	22
IL-12 (p40)	4	Conv.	MF8	16
IL-12 (p40)	4	Conv.	MF9	8
IL-12 (p40)	4	Conv.	MF10	10
IL-12 (p40)	4	Conv.	MF11	0
IL-12 (p40)	4	Conv.	MF12	22
IL-12 (p40)	4	αCD40.RBD	MF13	7
IL-12 (p40)	4	αCD40.RBD	MF14	1
IL-12 (p40)	4	αCD40.RBD	MF15	0
IL-12 (p40)	4	αCD40.RBD	MF16	0
IL-12 (p40)	4	αCD40.RBD	MF17	7
IL-12 (p40)	4	αCD40.RBD	MF18	6
IL-12 (p40)	6	Naive	MF1	0
IL-12 (p40)	6	Naive	MF2	0
IL-12 (p40)	6	Naive	MF3	0
IL-12 (p40)	6	Naive	MF4	0
IL-12 (p40)	6	Naive	MF5	0
IL-12 (p40)	6	Naive	MF6	0
IL-12 (p40)	6	Conv.	MF7	1
IL-12 (p40)	6	Conv.	MF8	0
IL-12 (p40)	6	Conv.	MF9	0
IL-12 (p40)	6	Conv.	MF10	0
IL-12 (p40)	6	Conv.	MF11	41
IL-12 (p40)	6	Conv.	MF12	0
IL-12 (p40)	6	αCD40.RBD	MF13	0
IL-12 (p40)	6	αCD40.RBD	MF14	0
IL-12 (p40)	6	αCD40.RBD	MF15	0
IL-12 (p40)	6	αCD40.RBD	MF16	0
IL-12 (p40)	6	αCD40.RBD	MF17	0
IL-12 (p40)	6	αCD40.RBD	MF18	0
IL-13	0	Naive	MF1	8
IL-13	0	Naive	MF2	8
IL-13	0	Naive	MF3	24
IL-13	0	Naive	MF4	5
IL-13	0	Naive	MF5	0
IL-13	0	Naive	MF6	2
IL-13	0	Conv.	MF7	14
IL-13	0	Conv.	MF8	0
IL-13	0	Conv.	MF9	0
IL-13	0	Conv.	MF10	17
IL-13	0	Conv.	MF11	9
IL-13	0	Conv.	MF12	9
IL-13	0	αCD40.RBD	MF13	5
IL-13	0	αCD40.RBD	MF14	5
IL-13	0	αCD40.RBD	MF15	9
IL-13	0	αCD40.RBD	MF16	8
IL-13	0	αCD40.RBD	MF17	5
IL-13	0	αCD40.RBD	MF18	9
IL-13	2	Naive	MF1	4
IL-13	2	Naive	MF2	0
IL-13	2	Naive	MF3	14
IL-13	2	Naive	MF4	5
IL-13	2	Naive	MF5	0
IL-13	2	Naive	MF6	0
IL-13	2	Conv.	MF7	3
IL-13	2	Conv.	MF8	0
IL-13	2	Conv.	MF9	0
IL-13	2	Conv.	MF10	6
IL-13	2	Conv.	MF11	0
IL-13	2	Conv.	MF12	0
IL-13	2	αCD40.RBD	MF13	0
IL-13	2	αCD40.RBD	MF14	0
IL-13	2	αCD40.RBD	MF15	0
IL-13	2	αCD40.RBD	MF16	0
IL-13	2	αCD40.RBD	MF17	0
IL-13	2	αCD40.RBD	MF18	5
IL-13	4	Naive	MF1	0
IL-13	4	Naive	MF2	0
IL-13	4	Naive	MF3	26
IL-13	4	Naive	MF4	6
IL-13	4	Naive	MF5	0
IL-13	4	Naive	MF6	0
IL-13	4	Conv.	MF7	18
IL-13	4	Conv.	MF8	0
IL-13	4	Conv.	MF9	0
IL-13	4	Conv.	MF10	19
IL-13	4	Conv.	MF11	0
IL-13	4	Conv.	MF12	0
IL-13	4	αCD40.RBD	MF13	0
IL-13	4	αCD40.RBD	MF14	0
IL-13	4	αCD40.RBD	MF15	0
IL-13	4	αCD40.RBD	MF16	0
IL-13	4	αCD40.RBD	MF17	0
IL-13	4	αCD40.RBD	MF18	8
IL-13	6	Naive	MF1	0
IL-13	6	Naive	MF2	0
IL-13	6	Naive	MF3	0
IL-13	6	Naive	MF4	0
IL-13	6	Naive	MF5	0
IL-13	6	Naive	MF6	0
IL-13	6	Conv.	MF7	0
IL-13	6	Conv.	MF8	0
IL-13	6	Conv.	MF9	0
IL-13	6	Conv.	MF10	0
IL-13	6	Conv.	MF11	27
IL-13	6	Conv.	MF12	0
IL-13	6	αCD40.RBD	MF13	0
IL-13	6	αCD40.RBD	MF14	0
IL-13	6	αCD40.RBD	MF15	0
IL-13	6	αCD40.RBD	MF16	0
IL-13	6	αCD40.RBD	MF17	0
IL-13	6	αCD40.RBD	MF18	0
G-CSF	0	Naive	MF1	27
G-CSF	0	Naive	MF2	37
G-CSF	0	Naive	MF3	28
G-CSF	0	Naive	MF4	0
G-CSF	0	Naive	MF5	0
G-CSF	0	Naive	MF6	0
G-CSF	0	Conv.	MF7	42
G-CSF	0	Conv.	MF8	0
G-CSF	0	Conv.	MF9	0
G-CSF	0	Conv.	MF10	36
G-CSF	0	Conv.	MF11	8
G-CSF	0	Conv.	MF12	8
G-CSF	0	αCD40.RBD	MF13	6
G-CSF	0	αCD40.RBD	MF14	3
G-CSF	0	αCD40.RBD	MF15	10
G-CSF	0	αCD40.RBD	MF16	1
G-CSF	0	αCD40.RBD	MF17	19
G-CSF	0	αCD40.RBD	MF18	21
G-CSF	2	Naive	MF1	0
G-CSF	2	Naive	MF2	0
G-CSF	2	Naive	MF3	0
G-CSF	2	Naive	MF4	0
G-CSF	2	Naive	MF5	0
G-CSF	2	Naive	MF6	0
G-CSF	2	Conv.	MF7	0
G-CSF	2	Conv.	MF8	0
G-CSF	2	Conv.	MF9	0
G-CSF	2	Conv.	MF10	0
G-CSF	2	Conv.	MF11	0
G-CSF	2	Conv.	MF12	0
G-CSF	2	αCD40.RBD	MF13	0
G-CSF	2	αCD40.RBD	MF14	0
G-CSF	2	αCD40.RBD	MF15	0
G-CSF	2	αCD40.RBD	MF16	0
G-CSF	2	αCD40.RBD	MF17	0
G-CSF	2	αCD40.RBD	MF18	4
G-CSF	4	Naive	MF1	0
G-CSF	4	Naive	MF2	14
G-CSF	4	Naive	MF3	43
G-CSF	4	Naive	MF4	23
G-CSF	4	Naive	MF5	0
G-CSF	4	Naive	MF6	0
G-CSF	4	Conv.	MF7	81
G-CSF	4	Conv.	MF8	61
G-CSF	4	Conv.	MF9	23
G-CSF	4	Conv.	MF10	0
G-CSF	4	Conv.	MF11	0
G-CSF	4	Conv.	MF12	23
G-CSF	4	αCD40.RBD	MF13	14
G-CSF	4	αCD40.RBD	MF14	0
G-CSF	4	αCD40.RBD	MF15	0
G-CSF	4	αCD40.RBD	MF16	0
G-CSF	4	αCD40.RBD	MF17	0
G-CSF	4	αCD40.RBD	MF18	23
G-CSF	6	Naive	MF1	0
G-CSF	6	Naive	MF2	0
G-CSF	6	Naive	MF3	0
G-CSF	6	Naive	MF4	0
G-CSF	6	Naive	MF5	0
G-CSF	6	Naive	MF6	0
G-CSF	6	Conv.	MF7	0
G-CSF	6	Conv.	MF8	0
G-CSF	6	Conv.	MF9	0
G-CSF	6	Conv.	MF10	0
G-CSF	6	Conv.	MF11	9
G-CSF	6	Conv.	MF12	0
G-CSF	6	αCD40.RBD	MF13	0
G-CSF	6	αCD40.RBD	MF14	0
G-CSF	6	αCD40.RBD	MF15	0
G-CSF	6	αCD40.RBD	MF16	0
G-CSF	6	αCD40.RBD	MF17	0
G-CSF	6	αCD40.RBD	MF18	0
