# Supplementary material for: Modelling the response to vaccine in non-human primates to define SARS-CoV-2 mechanistic correlates of protection
Source: eLife. 2022 Jul 8;11:e75427. doi: 10.7554/eLife.75427 (PMC9282856; doi:10.7554/eLife.75427)
Supplement: Figure 1—source data 11. [file elife-75427-fig1-data11.xlsx]

## Sheet: Feuil1
Figure 1 - figure supplement 3E
Study [Marlin, 2021]
Assay	Day post exposure	Group	Animal ID	ED50
D614G	-35	Conv.	MF7	130.7
D614G	-35	Conv.	MF8	272.5
D614G	-35	Conv.	MF9	130.8
D614G	-35	αCD40.RBD	MF13	409
D614G	-35	Conv.	MF10	43.54
D614G	-35	αCD40.RBD	MF14	265.5
D614G	-35	αCD40.RBD	MF15	311.4
D614G	-35	αCD40.RBD	MF16	59.11
D614G	-35	Conv.	MF11	150
D614G	-35	αCD40.RBD	MF17	82.17
D614G	-35	Conv.	MF12	200.1
D614G	-35	αCD40.RBD	MF18	265.9
D614G	-35	Naive	MF1	25
D614G	-35	Naive	MF2	25
D614G	-35	Naive	MF3	25
D614G	-35	Naive	MF4	25
D614G	-35	Naive	MF5	25
D614G	-35	Naive	MF6	25
B117	-35	Conv.	MF7	240.4
B117	-35	Conv.	MF8	734.8
B117	-35	Conv.	MF9	182.5
B117	-35	αCD40.RBD	MF13	728
B117	-35	Conv.	MF10	69.44
B117	-35	αCD40.RBD	MF14	381.1
B117	-35	αCD40.RBD	MF15	391
B117	-35	αCD40.RBD	MF16	45.87
B117	-35	Conv.	MF11	386.5
B117	-35	αCD40.RBD	MF17	232.3
B117	-35	Conv.	MF12	288
B117	-35	αCD40.RBD	MF18	574.2
B117	-35	Naive	MF1	25
B117	-35	Naive	MF2	25
B117	-35	Naive	MF3	25
B117	-35	Naive	MF4	25
B117	-35	Naive	MF5	25
B117	-35	Naive	MF6	25
B1351	-35	Conv.	MF7	37.17
B1351	-35	Conv.	MF8	113.2
B1351	-35	Conv.	MF9	35.85
B1351	-35	αCD40.RBD	MF13	93.81
B1351	-35	Conv.	MF10	25
B1351	-35	αCD40.RBD	MF14	48.41
B1351	-35	αCD40.RBD	MF15	46.14
B1351	-35	αCD40.RBD	MF16	25
B1351	-35	Conv.	MF11	55.37
B1351	-35	αCD40.RBD	MF17	25
B1351	-35	Conv.	MF12	25
B1351	-35	αCD40.RBD	MF18	84.34
B1351	-35	Naive	MF1	25
B1351	-35	Naive	MF2	25
B1351	-35	Naive	MF3	25
B1351	-35	Naive	MF4	25
B1351	-35	Naive	MF5	25
B1351	-35	Naive	MF6	25
D614G	0	Conv.	MF7	159.7
D614G	0	Conv.	MF8	325.3
D614G	0	Conv.	MF9	140.3
D614G	0	αCD40.RBD	MF13	62074
D614G	0	Conv.	MF10	30.81
D614G	0	αCD40.RBD	MF14	27939
D614G	0	αCD40.RBD	MF15	10027
D614G	0	αCD40.RBD	MF16	1026
D614G	0	Conv.	MF11	172.5
D614G	0	αCD40.RBD	MF17	8918
D614G	0	Conv.	MF12	151
D614G	0	αCD40.RBD	MF18	2854
D614G	0	Naive	MF1	25
D614G	0	Naive	MF2	25
D614G	0	Naive	MF3	25
D614G	0	Naive	MF4	25
D614G	0	Naive	MF5	25
D614G	0	Naive	MF6	25
B117	0	Conv.	MF7	121.6
B117	0	Conv.	MF8	264.2
B117	0	Conv.	MF9	140.6
B117	0	αCD40.RBD	MF13	150612
B117	0	Conv.	MF10	46.95
B117	0	αCD40.RBD	MF14	28961
B117	0	αCD40.RBD	MF15	80169
B117	0	αCD40.RBD	MF16	2282
B117	0	Conv.	MF11	222.7
B117	0	αCD40.RBD	MF17	27887
B117	0	Conv.	MF12	183.5
B117	0	αCD40.RBD	MF18	10598
B117	0	Naive	MF1	25
B117	0	Naive	MF2	25
B117	0	Naive	MF3	25
B117	0	Naive	MF4	25
B117	0	Naive	MF5	25
B117	0	Naive	MF6	25
B1351	0	Conv.	MF7	80.35
B1351	0	Conv.	MF8	368.6
B1351	0	Conv.	MF9	129.1
B1351	0	αCD40.RBD	MF13	7215
B1351	0	Conv.	MF10	81.11
B1351	0	αCD40.RBD	MF14	2891
B1351	0	αCD40.RBD	MF15	558.2
B1351	0	αCD40.RBD	MF16	99.67
B1351	0	Conv.	MF11	45.47
B1351	0	αCD40.RBD	MF17	699.3
B1351	0	Conv.	MF12	31.15
B1351	0	αCD40.RBD	MF18	606.4
B1351	0	Naive	MF1	25
B1351	0	Naive	MF2	25
B1351	0	Naive	MF3	25
B1351	0	Naive	MF4	25
B1351	0	Naive	MF5	25
B1351	0	Naive	MF6	25
D614G	20	Conv.	MF7	10462
D614G	20	Conv.	MF8	7064
D614G	20	Conv.	MF9	12693
D614G	20	αCD40.RBD	MF13	54999
D614G	20	Conv.	MF10	15158
D614G	20	αCD40.RBD	MF14	12265
D614G	20	αCD40.RBD	MF15	10962
D614G	20	αCD40.RBD	MF16	2566
D614G	20	Conv.	MF11	3843
D614G	20	αCD40.RBD	MF17	15188
D614G	20	Conv.	MF12	13370
D614G	20	αCD40.RBD	MF18	4057
D614G	20	Naive	MF1	156.1
D614G	20	Naive	MF2	330.5
D614G	20	Naive	MF3	682
D614G	20	Naive	MF4	121.8
D614G	20	Naive	MF5	201.6
D614G	20	Naive	MF6	206.7
B117	20	Conv.	MF7	14435
B117	20	Conv.	MF8	23954
B117	20	Conv.	MF9	28087
B117	20	αCD40.RBD	MF13	160674
B117	20	Conv.	MF10	24362
B117	20	αCD40.RBD	MF14	22455
B117	20	αCD40.RBD	MF15	12955
B117	20	αCD40.RBD	MF16	3059
B117	20	Conv.	MF11	4052
B117	20	αCD40.RBD	MF17	20395
B117	20	Conv.	MF12	27403
B117	20	αCD40.RBD	MF18	6674
B117	20	Naive	MF1	176.1
B117	20	Naive	MF2	266.3
B117	20	Naive	MF3	940.5
B117	20	Naive	MF4	187.3
B117	20	Naive	MF5	180.7
B117	20	Naive	MF6	155.7
B1351	20	Conv.	MF7	737.8
B1351	20	Conv.	MF8	3098
B1351	20	Conv.	MF9	737.5
B1351	20	αCD40.RBD	MF13	1995
B1351	20	Conv.	MF10	389.5
B1351	20	αCD40.RBD	MF14	805.6
B1351	20	αCD40.RBD	MF15	618.3
B1351	20	αCD40.RBD	MF16	345.9
B1351	20	Conv.	MF11	1152
B1351	20	αCD40.RBD	MF17	900.3
B1351	20	Conv.	MF12	1655
B1351	20	αCD40.RBD	MF18	771.2
B1351	20	Naive	MF1	25
B1351	20	Naive	MF2	25
B1351	20	Naive	MF3	85.03
B1351	20	Naive	MF4	25
B1351	20	Naive	MF5	37.28
B1351	20	Naive	MF6	25
