# Supplementary material for: Modelling the response to vaccine in non-human primates to define SARS-CoV-2 mechanistic correlates of protection
Source: eLife. 2022 Jul 8;11:e75427. doi: 10.7554/eLife.75427 (PMC9282856; doi:10.7554/eLife.75427)
Supplement: Figure 2—source data 1. [file elife-75427-fig2-data1.xlsx]

## Sheet: Feuil1
Figure 2 - figure supplement 2C
	Volume (cm3)		Weight (kg)
Anonym	Trachea	Naso
MF1	3.11274	5.66607	5.91
MF2	2.21585	4.04168	3.5
MF3	3.07546	5.77132	5.13
MF4	2.57901	5.65105	6.48
