# Supplementary material for: Modelling the response to vaccine in non-human primates to define SARS-CoV-2 mechanistic correlates of protection
Source: eLife. 2022 Jul 8;11:e75427. doi: 10.7554/eLife.75427 (PMC9282856; doi:10.7554/eLife.75427)
Supplement: Figure 2—source data 2. [file elife-75427-fig2-data2.xlsx]

## Sheet: Feuil1
Figure S9D
Study [Marlin, 2021]
Group	Animal ID	Weight
Naive	MF1	5.37
Naive	MF2	3.47
Naive	MF3	6.23
Naive	MF4	3.2
Naive	MF5	3.03
Naive	MF6	3.12
Conv.	MF7	3.39
Conv.	MF8	3.21
Conv.	MF9	4.85
Conv.	MF10	4.12
Conv.	MF11	5.15
Conv.	MF12	4.74
αCD40.RBD	MF13	4.19
αCD40.RBD	MF14	3.46
αCD40.RBD	MF15	3.82
αCD40.RBD	MF16	4.1
αCD40.RBD	MF17	4.78
αCD40.RBD	MF18	3.22
