# Supplementary material for: Modelling the response to vaccine in non-human primates to define SARS-CoV-2 mechanistic correlates of protection
Source: eLife. 2022 Jul 8;11:e75427. doi: 10.7554/eLife.75427 (PMC9282856; doi:10.7554/eLife.75427)
Supplement: Figure 2—source data 3. [file elife-75427-fig2-data3.xlsx]

## Sheet: Feuil1
Figure 2- figure supplement 2E
Fluid	Days post infection (dpi)	Animal ID	Group	Unit	Value			N.D	Not Determined
Tracheal fluid	0	MF5	IN + per OS	viral load (copies / mL)	<LOD			<LOD	Under the limit of detection (181)
Tracheal fluid	1	MF5	IN + per OS	viral load (copies / mL)	1447505
Tracheal fluid	2	MF5	IN + per OS	viral load (copies / mL)	1.96962e+06
Tracheal fluid	3	MF5	IN + per OS	viral load (copies / mL)	1.59944e+07
Tracheal fluid	4	MF5	IN + per OS	viral load (copies / mL)	3.64677e+06
Tracheal fluid	5	MF5	IN + per OS	viral load (copies / mL)	278605
Tracheal fluid	7	MF5	IN + per OS	viral load (copies / mL)	143681
Tracheal fluid	9	MF5	IN + per OS	viral load (copies / mL)	2096.56
Tracheal fluid	11	MF5	IN + per OS	viral load (copies / mL)	<LOD
Tracheal fluid	13	MF5	IN + per OS	viral load (copies / mL)	<LOD
Tracheal fluid	17	MF5	IN + per OS	viral load (copies / mL)	<LOD
Tracheal fluid	19	MF5	IN + per OS	viral load (copies / mL)	<LOD
Nasal fluid	0	MF5	IN + per OS	viral load (copies / mL)	<LOD
Nasal fluid	1	MF5	IN + per OS	viral load (copies / mL)	248003134
Nasal fluid	2	MF5	IN + per OS	viral load (copies / mL)	1.74082e+07
Nasal fluid	3	MF5	IN + per OS	viral load (copies / mL)	152679565
Nasal fluid	4	MF5	IN + per OS	viral load (copies / mL)	6.8568e+06
Nasal fluid	5	MF5	IN + per OS	viral load (copies / mL)	2.93951e+06
Nasal fluid	7	MF5	IN + per OS	viral load (copies / mL)	2.65951e+06
Nasal fluid	9	MF5	IN + per OS	viral load (copies / mL)	8319.45
Nasal fluid	11	MF5	IN + per OS	viral load (copies / mL)	<LOD
Nasal fluid	13	MF5	IN + per OS	viral load (copies / mL)	<LOD
Nasal fluid	17	MF5	IN + per OS	viral load (copies / mL)	<LOD
Nasal fluid	19	MF5	IN + per OS	viral load (copies / mL)	730.078
Nasal fluid	0	MF6	IN + per OS	viral load (copies / mL)	<LOD
Nasal fluid	1	MF6	IN + per OS	viral load (copies / mL)	327503
Nasal fluid	2	MF6	IN + per OS	viral load (copies / mL)	3.50904e+06
Nasal fluid	3	MF6	IN + per OS	viral load (copies / mL)	1.09676e+07
Nasal fluid	4	MF6	IN + per OS	viral load (copies / mL)	1.79527e+07
Nasal fluid	5	MF6	IN + per OS	viral load (copies / mL)	44576
Nasal fluid	7	MF6	IN + per OS	viral load (copies / mL)	29186.2
Nasal fluid	9	MF6	IN + per OS	viral load (copies / mL)	76416.3
Nasal fluid	11	MF6	IN + per OS	viral load (copies / mL)	<LOD
Nasal fluid	13	MF6	IN + per OS	viral load (copies / mL)	<LOD
Nasal fluid	17	MF6	IN + per OS	viral load (copies / mL)	<LOD
Nasal fluid	19	MF6	IN + per OS	viral load (copies / mL)	<LOD
Tracheal fluid	0	MF6	IN + per OS	viral load (copies / mL)	<LOD
Tracheal fluid	1	MF6	IN + per OS	viral load (copies / mL)	47044.6
Tracheal fluid	2	MF6	IN + per OS	viral load (copies / mL)	2.12727e+06
Tracheal fluid	3	MF6	IN + per OS	viral load (copies / mL)	7.69631e+06
Tracheal fluid	4	MF6	IN + per OS	viral load (copies / mL)	182417
Tracheal fluid	5	MF6	IN + per OS	viral load (copies / mL)	7527
Tracheal fluid	7	MF6	IN + per OS	viral load (copies / mL)	15642.6
Tracheal fluid	9	MF6	IN + per OS	viral load (copies / mL)	3539.19
Tracheal fluid	11	MF6	IN + per OS	viral load (copies / mL)	<LOD
Tracheal fluid	13	MF6	IN + per OS	viral load (copies / mL)	<LOD
Tracheal fluid	17	MF6	IN + per OS	viral load (copies / mL)	<LOD
Tracheal fluid	19	MF6	IN + per OS	viral load (copies / mL)	<LOD
