# Supplementary material for: Modelling the response to vaccine in non-human primates to define SARS-CoV-2 mechanistic correlates of protection
Source: eLife. 2022 Jul 8;11:e75427. doi: 10.7554/eLife.75427 (PMC9282856; doi:10.7554/eLife.75427)
Supplement: Figure 4—source data 1. [file elife-75427-fig4-data1.xlsx]

## Sheet: Feuil1
Figure 4A / Figure 1 - figure supplement 1D and 3C
Study [Marlin, 2021]
Assay	Week post immunisation	Group	Animal ID	Value (Titers)
ELISA RBD	-1	Naive	MF1	0.742802
ELISA RBD	2	Naive	MF1	0.914709
ELISA RBD	4	Naive	MF1	0.880744
ELISA RBD	5.28571	Naive	MF1	0.990549
ELISA RBD	6.85714	Naive	MF1	1.87713
ELISA RBD	-1	Naive	MF2	0.620332
ELISA RBD	2	Naive	MF2	0.915424
ELISA RBD	4	Naive	MF2	0.844057
ELISA RBD	5.28571	Naive	MF2	0.686344
ELISA RBD	6.85714	Naive	MF2	1.88406
ELISA RBD	-1	Naive	MF3	1.2347
ELISA RBD	2	Naive	MF3	1.27352
ELISA RBD	4	Naive	MF3	1.2204
ELISA RBD	5.28571	Naive	MF3	1.44309
ELISA RBD	6.85714	Naive	MF3	2.69572
ELISA RBD	-1	Naive	MF4	1.03091
ELISA RBD	2	Naive	MF4	1.08118
ELISA RBD	4	Naive	MF4	1.03758
ELISA RBD	5.28571	Naive	MF4	0.927015
ELISA RBD	6.85714	Naive	MF4	1.48241
ELISA RBD	-1	Naive	MF5	0.728158
ELISA RBD	2	Naive	MF5	0.997402
ELISA RBD	4	Naive	MF5	0.881074
ELISA RBD	5.28571	Naive	MF5	0.574629
ELISA RBD	6.85714	Naive	MF5	1.8884
ELISA RBD	-1	Naive	MF6	0.815025
ELISA RBD	2	Naive	MF6	0.997834
ELISA RBD	4	Naive	MF6	0.904134
ELISA RBD	5.28571	Naive	MF6	1.15833
ELISA RBD	6.85714	Naive	MF6	2.08555
ELISA RBD	-1	Conv.	MF7	2.54431
ELISA RBD	2	Conv.	MF7	2.28175
ELISA RBD	4	Conv.	MF7	2.50543
ELISA RBD	5.28571	Conv.	MF7	3.84466
ELISA RBD	6.85714	Conv.	MF7	3.97062
ELISA RBD	-1	Conv.	MF8	2.55999
ELISA RBD	2	Conv.	MF8	2.38679
ELISA RBD	4	Conv.	MF8	2.4734
ELISA RBD	5.28571	Conv.	MF8	3.82449
ELISA RBD	6.85714	Conv.	MF8	3.92849
ELISA RBD	-1	Conv.	MF9	2.16424
ELISA RBD	2	Conv.	MF9	2.04211
ELISA RBD	4	Conv.	MF9	2.11708
ELISA RBD	5.28571	Conv.	MF9	3.9201
ELISA RBD	6.85714	Conv.	MF9	3.98506
ELISA RBD	-1	Conv.	MF10	1.72745
ELISA RBD	2	Conv.	MF10	1.80134
ELISA RBD	4	Conv.	MF10	1.72285
ELISA RBD	5.28571	Conv.	MF10	3.59636
ELISA RBD	6.85714	Conv.	MF10	3.61368
ELISA RBD	-1	Conv.	MF11	2.2988
ELISA RBD	2	Conv.	MF11	2.22026
ELISA RBD	4	Conv.	MF11	2.40793
ELISA RBD	5.28571	Conv.	MF11	3.5743
ELISA RBD	6.85714	Conv.	MF11	3.67223
ELISA RBD	-1	Conv.	MF12	2.29488
ELISA RBD	2	Conv.	MF12	2.1762
ELISA RBD	4	Conv.	MF12	2.31301
ELISA RBD	5.28571	Conv.	MF12	4.02854
ELISA RBD	6.85714	Conv.	MF12	3.9307
ELISA RBD	-1	αCD40.RBD	MF13	2.89087
ELISA RBD	2	αCD40.RBD	MF13	4.53985
ELISA RBD	4	αCD40.RBD	MF13	4.69508
ELISA RBD	5.28571	αCD40.RBD	MF13	4.36937
ELISA RBD	6.85714	αCD40.RBD	MF13	4.43902
ELISA RBD	-1	αCD40.RBD	MF14	2.41146
ELISA RBD	2	αCD40.RBD	MF14	4.20789
ELISA RBD	4	αCD40.RBD	MF14	4.1528
ELISA RBD	5.28571	αCD40.RBD	MF14	3.85574
ELISA RBD	6.85714	αCD40.RBD	MF14	3.95234
ELISA RBD	-1	αCD40.RBD	MF15	2.59344
ELISA RBD	2	αCD40.RBD	MF15	4.01291
ELISA RBD	4	αCD40.RBD	MF15	3.97102
ELISA RBD	5.28571	αCD40.RBD	MF15	3.58653
ELISA RBD	6.85714	αCD40.RBD	MF15	3.79833
ELISA RBD	-1	αCD40.RBD	MF16	1.65408
ELISA RBD	2	αCD40.RBD	MF16	3.07248
ELISA RBD	4	αCD40.RBD	MF16	3.26576
ELISA RBD	5.28571	αCD40.RBD	MF16	2.99097
ELISA RBD	6.85714	αCD40.RBD	MF16	3.30698
ELISA RBD	-1	αCD40.RBD	MF17	1.99571
ELISA RBD	2	αCD40.RBD	MF17	3.88739
ELISA RBD	4	αCD40.RBD	MF17	4.04499
ELISA RBD	5.28571	αCD40.RBD	MF17	3.78781
ELISA RBD	6.85714	αCD40.RBD	MF17	3.92518
ELISA RBD	-1	αCD40.RBD	MF18	2.54217
ELISA RBD	2	αCD40.RBD	MF18	3.86678
ELISA RBD	4	αCD40.RBD	MF18	3.94006
ELISA RBD	5.28571	αCD40.RBD	MF18	3.51727
ELISA RBD	6.85714	αCD40.RBD	MF18	3.75845
ELISA N	-1	Naive	MF1	1.13059
ELISA N	2	Naive	MF1	0.950782
ELISA N	4	Naive	MF1	1.05056
ELISA N	5.28571	Naive	MF1	0.747632
ELISA N	6.85714	Naive	MF1	1.45618
ELISA N	-1	Naive	MF2	0.934047
ELISA N	2	Naive	MF2	0.718058
ELISA N	4	Naive	MF2	0.88773
ELISA N	5.28571	Naive	MF2	0.861697
ELISA N	6.85714	Naive	MF2	1.65208
ELISA N	-1	Naive	MF3	1.4725
ELISA N	2	Naive	MF3	1.37603
ELISA N	4	Naive	MF3	1.55502
ELISA N	5.28571	Naive	MF3	1.27148
ELISA N	6.85714	Naive	MF3	1.74861
ELISA N	-1	Naive	MF4	1.35942
ELISA N	2	Naive	MF4	1.08959
ELISA N	4	Naive	MF4	1.25594
ELISA N	5.28571	Naive	MF4	0.912574
ELISA N	6.85714	Naive	MF4	1.2926
ELISA N	-1	Naive	MF5	0.860121
ELISA N	2	Naive	MF5	0.640354
ELISA N	4	Naive	MF5	0.893469
ELISA N	5.28571	Naive	MF5	0.608359
ELISA N	6.85714	Naive	MF5	0.978811
ELISA N	-1	Naive	MF6	0.831208
ELISA N	2	Naive	MF6	0.7716
ELISA N	4	Naive	MF6	0.840734
ELISA N	5.28571	Naive	MF6	0.438899
ELISA N	6.85714	Naive	MF6	1.84164
ELISA N	-1	Conv.	MF7	1.33612
ELISA N	2	Conv.	MF7	1.31319
ELISA N	4	Conv.	MF7	1.09496
ELISA N	5.28571	Conv.	MF7	2.37182
ELISA N	6.85714	Conv.	MF7	2.69122
ELISA N	-1	Conv.	MF8	1.90194
ELISA N	2	Conv.	MF8	1.90413
ELISA N	4	Conv.	MF8	1.65267
ELISA N	5.28571	Conv.	MF8	3.73921
ELISA N	6.85714	Conv.	MF8	3.81502
ELISA N	-1	Conv.	MF9	1.95983
ELISA N	2	Conv.	MF9	1.97757
ELISA N	4	Conv.	MF9	1.69144
ELISA N	5.28571	Conv.	MF9	3.58889
ELISA N	6.85714	Conv.	MF9	3.88207
ELISA N	-1	Conv.	MF10	1.22554
ELISA N	2	Conv.	MF10	1.71851
ELISA N	4	Conv.	MF10	1.60328
ELISA N	5.28571	Conv.	MF10	1.70863
ELISA N	6.85714	Conv.	MF10	2.3495
ELISA N	-1	Conv.	MF11	1.4045
ELISA N	2	Conv.	MF11	1.59346
ELISA N	4	Conv.	MF11	1.42159
ELISA N	5.28571	Conv.	MF11	3.54622
ELISA N	6.85714	Conv.	MF11	3.70908
ELISA N	-1	Conv.	MF12	0.529547
ELISA N	2	Conv.	MF12	0.83654
ELISA N	4	Conv.	MF12	0.484391
ELISA N	5.28571	Conv.	MF12	2.56767
ELISA N	6.85714	Conv.	MF12	2.89894
ELISA N	-1	αCD40.RBD	MF13	2.02291
ELISA N	2	αCD40.RBD	MF13	1.97062
ELISA N	4	αCD40.RBD	MF13	1.94539
ELISA N	5.28571	αCD40.RBD	MF13	3.59551
ELISA N	6.85714	αCD40.RBD	MF13	3.92592
ELISA N	-1	αCD40.RBD	MF14	1.76523
ELISA N	2	αCD40.RBD	MF14	1.64111
ELISA N	4	αCD40.RBD	MF14	1.5373
ELISA N	5.28571	αCD40.RBD	MF14	2.81389
ELISA N	6.85714	αCD40.RBD	MF14	2.94731
ELISA N	-1	αCD40.RBD	MF15	1.8059
ELISA N	2	αCD40.RBD	MF15	1.79317
ELISA N	4	αCD40.RBD	MF15	1.66555
ELISA N	5.28571	αCD40.RBD	MF15	3.31578
ELISA N	6.85714	αCD40.RBD	MF15	3.59602
ELISA N	-1	αCD40.RBD	MF16	1.16311
ELISA N	2	αCD40.RBD	MF16	1.13549
ELISA N	4	αCD40.RBD	MF16	0.715569
ELISA N	5.28571	αCD40.RBD	MF16	2.49147
ELISA N	6.85714	αCD40.RBD	MF16	2.54806
ELISA N	-1	αCD40.RBD	MF17	1.11639
ELISA N	2	αCD40.RBD	MF17	1.22163
ELISA N	4	αCD40.RBD	MF17	0.994819
ELISA N	5.28571	αCD40.RBD	MF17	1.25908
ELISA N	6.85714	αCD40.RBD	MF17	1.99611
ELISA N	-1	αCD40.RBD	MF18	1.83876
ELISA N	2	αCD40.RBD	MF18	1.92665
ELISA N	4	αCD40.RBD	MF18	1.77859
ELISA N	5.28571	αCD40.RBD	MF18	3.03016
ELISA N	6.85714	αCD40.RBD	MF18	2.98422
