# Supplementary material for: Modelling the response to vaccine in non-human primates to define SARS-CoV-2 mechanistic correlates of protection
Source: eLife. 2022 Jul 8;11:e75427. doi: 10.7554/eLife.75427 (PMC9282856; doi:10.7554/eLife.75427)
Supplement: Figure 4—source data 2. [file elife-75427-fig4-data2.xlsx]

## Sheet: Feuil1
Figure 4A / Figure 1 - figure supplement 3B
Study [Marlin, 2021]
Protein	Day post exposure	Group	Animal ID	Value ECL
RBD	-35	Naive	MF1	349851
RBD	-35	Naive	MF2	334167
RBD	-35	Naive	MF3	367047
RBD	-35	Naive	MF4	368243
RBD	-35	Naive	MF5	283824
RBD	-35	Naive	MF6	337553
RBD	-35	Conv.	MF7	142919
RBD	-35	Conv.	MF8	95316
RBD	-35	Conv.	MF9	199799
RBD	-35	Conv.	MF10	327333
RBD	-35	Conv.	MF11	116664
RBD	-35	Conv.	MF12	165494
RBD	-35	αCD40.RBD	MF13	6009
RBD	-35	αCD40.RBD	MF14	90874
RBD	-35	αCD40.RBD	MF15	14266
RBD	-35	αCD40.RBD	MF16	340729
RBD	-35	αCD40.RBD	MF17	257693
RBD	-35	αCD40.RBD	MF18	85418
RBD	-14	Naive	MF1	340926
RBD	-14	Naive	MF2	337649
RBD	-14	Naive	MF3	392356
RBD	-14	Naive	MF4	366608
RBD	-14	Naive	MF5	287438
RBD	-14	Naive	MF6	322366
RBD	-14	Conv.	MF7	201029
RBD	-14	Conv.	MF8	91567
RBD	-14	Conv.	MF9	261946
RBD	-14	Conv.	MF10	327204
RBD	-14	Conv.	MF11	139821
RBD	-14	Conv.	MF12	239708
RBD	-14	αCD40.RBD	MF13	50
RBD	-14	αCD40.RBD	MF14	61
RBD	-14	αCD40.RBD	MF15	59
RBD	-14	αCD40.RBD	MF16	473
RBD	-14	αCD40.RBD	MF17	60
RBD	-14	αCD40.RBD	MF18	71
RBD	0	Naive	MF1	289992
RBD	0	Naive	MF2	286374
RBD	0	Naive	MF3	333491
RBD	0	Naive	MF4	289881
RBD	0	Naive	MF5	261461
RBD	0	Naive	MF6	305316
RBD	0	Conv.	MF7	157148
RBD	0	Conv.	MF8	103732
RBD	0	Conv.	MF9	228140
RBD	0	Conv.	MF10	266463
RBD	0	Conv.	MF11	117014
RBD	0	Conv.	MF12	179402
RBD	0	αCD40.RBD	MF13	68
RBD	0	αCD40.RBD	MF14	66
RBD	0	αCD40.RBD	MF15	53
RBD	0	αCD40.RBD	MF16	408
RBD	0	αCD40.RBD	MF17	76
RBD	0	αCD40.RBD	MF18	86
RBD	4	Naive	MF1	325770
RBD	4	Naive	MF2	314267
RBD	4	Naive	MF3	383700
RBD	4	Naive	MF4	337957
RBD	4	Naive	MF5	255622
RBD	4	Naive	MF6	296034
RBD	4	Conv.	MF7	133818
RBD	4	Conv.	MF8	83576
RBD	4	Conv.	MF9	103849
RBD	4	Conv.	MF10	305064
RBD	4	Conv.	MF11	131123
RBD	4	Conv.	MF12	144253
RBD	4	αCD40.RBD	MF13	60
RBD	4	αCD40.RBD	MF14	68
RBD	4	αCD40.RBD	MF15	97
RBD	4	αCD40.RBD	MF16	698
RBD	4	αCD40.RBD	MF17	77
RBD	4	αCD40.RBD	MF18	75
RBD	9	Naive	MF1	89308
RBD	9	Naive	MF2	198007
RBD	9	Naive	MF3	182087
RBD	9	Naive	MF4	243742
RBD	9	Naive	MF5	181989
RBD	9	Naive	MF6	246987
RBD	9	Conv.	MF7	53
RBD	9	Conv.	MF8	68
RBD	9	Conv.	MF9	81
RBD	9	Conv.	MF10	76
RBD	9	Conv.	MF11	86
RBD	9	Conv.	MF12	63
RBD	9	αCD40.RBD	MF13	58
RBD	9	αCD40.RBD	MF14	75
RBD	9	αCD40.RBD	MF15	82
RBD	9	αCD40.RBD	MF16	462
RBD	9	αCD40.RBD	MF17	70
RBD	9	αCD40.RBD	MF18	82
RBD	20	Naive	MF1	120922
RBD	20	Naive	MF2	98550
RBD	20	Naive	MF3	3360
RBD	20	Naive	MF4	202612
RBD	20	Naive	MF5	82656
RBD	20	Naive	MF6	85208
RBD	20	Conv.	MF7	43
RBD	20	Conv.	MF8	51
RBD	20	Conv.	MF9	53
RBD	20	Conv.	MF10	87
RBD	20	Conv.	MF11	58
RBD	20	Conv.	MF12	56
RBD	20	αCD40.RBD	MF13	48
RBD	20	αCD40.RBD	MF14	63
RBD	20	αCD40.RBD	MF15	85
RBD	20	αCD40.RBD	MF16	152
RBD	20	αCD40.RBD	MF17	71
RBD	20	αCD40.RBD	MF18	84
Spike	-35	Naive	MF1	940112
Spike	-35	Naive	MF2	916684
Spike	-35	Naive	MF3	985196
Spike	-35	Naive	MF4	960124
Spike	-35	Naive	MF5	851257
Spike	-35	Naive	MF6	891948
Spike	-35	Conv.	MF7	346897
Spike	-35	Conv.	MF8	282232
Spike	-35	Conv.	MF9	569520
Spike	-35	Conv.	MF10	786234
Spike	-35	Conv.	MF11	387290
Spike	-35	Conv.	MF12	498647
Spike	-35	αCD40.RBD	MF13	32225
Spike	-35	αCD40.RBD	MF14	274315
Spike	-35	αCD40.RBD	MF15	98684
Spike	-35	αCD40.RBD	MF16	847318
Spike	-35	αCD40.RBD	MF17	655496
Spike	-35	αCD40.RBD	MF18	296722
Spike	-14	Naive	MF1	946872
Spike	-14	Naive	MF2	889994
Spike	-14	Naive	MF3	1005262
Spike	-14	Naive	MF4	955666
Spike	-14	Naive	MF5	893507
Spike	-14	Naive	MF6	874559
Spike	-14	Conv.	MF7	449191
Spike	-14	Conv.	MF8	267589
Spike	-14	Conv.	MF9	636881
Spike	-14	Conv.	MF10	855044
Spike	-14	Conv.	MF11	429212
Spike	-14	Conv.	MF12	598258
Spike	-14	αCD40.RBD	MF13	41
Spike	-14	αCD40.RBD	MF14	60
Spike	-14	αCD40.RBD	MF15	74
Spike	-14	αCD40.RBD	MF16	3929
Spike	-14	αCD40.RBD	MF17	74
Spike	-14	αCD40.RBD	MF18	82
Spike	0	Naive	MF1	839585
Spike	0	Naive	MF2	828375
Spike	0	Naive	MF3	912573
Spike	0	Naive	MF4	861477
Spike	0	Naive	MF5	759858
Spike	0	Naive	MF6	814326
Spike	0	Conv.	MF7	428044
Spike	0	Conv.	MF8	386751
Spike	0	Conv.	MF9	641488
Spike	0	Conv.	MF10	809745
Spike	0	Conv.	MF11	429195
Spike	0	Conv.	MF12	527439
Spike	0	αCD40.RBD	MF13	62
Spike	0	αCD40.RBD	MF14	72
Spike	0	αCD40.RBD	MF15	68
Spike	0	αCD40.RBD	MF16	3997
Spike	0	αCD40.RBD	MF17	103
Spike	0	αCD40.RBD	MF18	101
Spike	4	Naive	MF1	883185
Spike	4	Naive	MF2	859202
Spike	4	Naive	MF3	939978
Spike	4	Naive	MF4	920808
Spike	4	Naive	MF5	867757
Spike	4	Naive	MF6	869621
Spike	4	Conv.	MF7	386417
Spike	4	Conv.	MF8	333566
Spike	4	Conv.	MF9	404603
Spike	4	Conv.	MF10	788916
Spike	4	Conv.	MF11	478579
Spike	4	Conv.	MF12	458934
Spike	4	αCD40.RBD	MF13	52
Spike	4	αCD40.RBD	MF14	85
Spike	4	αCD40.RBD	MF15	162
Spike	4	αCD40.RBD	MF16	9669
Spike	4	αCD40.RBD	MF17	81
Spike	4	αCD40.RBD	MF18	133
Spike	9	Naive	MF1	358545
Spike	9	Naive	MF2	588059
Spike	9	Naive	MF3	641896
Spike	9	Naive	MF4	749935
Spike	9	Naive	MF5	633187
Spike	9	Naive	MF6	654037
Spike	9	Conv.	MF7	65
Spike	9	Conv.	MF8	104
Spike	9	Conv.	MF9	153
Spike	9	Conv.	MF10	114
Spike	9	Conv.	MF11	199
Spike	9	Conv.	MF12	80
Spike	9	αCD40.RBD	MF13	74
Spike	9	αCD40.RBD	MF14	124
Spike	9	αCD40.RBD	MF15	153
Spike	9	αCD40.RBD	MF16	2377
Spike	9	αCD40.RBD	MF17	109
Spike	9	αCD40.RBD	MF18	178
Spike	20	Naive	MF1	385545
Spike	20	Naive	MF2	254904
Spike	20	Naive	MF3	10504
Spike	20	Naive	MF4	641349
Spike	20	Naive	MF5	321457
Spike	20	Naive	MF6	265946
Spike	20	Conv.	MF7	47
Spike	20	Conv.	MF8	58
Spike	20	Conv.	MF9	116
Spike	20	Conv.	MF10	161
Spike	20	Conv.	MF11	138
Spike	20	Conv.	MF12	94
Spike	20	αCD40.RBD	MF13	37
Spike	20	αCD40.RBD	MF14	90
Spike	20	αCD40.RBD	MF15	165
Spike	20	αCD40.RBD	MF16	550
Spike	20	αCD40.RBD	MF17	93
Spike	20	αCD40.RBD	MF18	180
