# Supplementary material for: Modelling the response to vaccine in non-human primates to define SARS-CoV-2 mechanistic correlates of protection
Source: eLife. 2022 Jul 8;11:e75427. doi: 10.7554/eLife.75427 (PMC9282856; doi:10.7554/eLife.75427)
Supplement: Figure 5—source data 1. [file elife-75427-fig5-data1.xlsx]

## Sheet: Feuil1
Figure 5B
Study [Brouwer 2021]
Sample Type	GROUP Name	Day post exposure	Animal	Value	unit
IgG spike	Naive	0	MF1	112.445	AU/mL
IgG spike	Naive	0	MF2	77.3268	AU/mL
IgG spike	Naive	0	MF3	254.52	AU/mL
IgG spike	Naive	0	MF4	331.441	AU/mL
IgG spike	Vaccinated	0	MF5	359588	AU/mL
IgG spike	Vaccinated	0	MF6	165221	AU/mL
IgG spike	Vaccinated	0	MF7	363414	AU/mL
IgG spike	Vaccinated	0	MF8	249712	AU/mL
IgG spike	Vaccinated	0	MF9	342264	AU/mL
IgG spike	Vaccinated	0	MF10	364794	AU/mL
IgG RBD	Naive	0	MF1	25.1343	AU/mL
IgG RBD	Naive	0	MF2	22.5646	AU/mL
IgG RBD	Naive	0	MF3	33.7709	AU/mL
IgG RBD	Naive	0	MF4	35.8685	AU/mL
IgG RBD	Vaccinated	0	MF5	239200	AU/mL
IgG RBD	Vaccinated	0	MF6	86639.7	AU/mL
IgG RBD	Vaccinated	0	MF7	261184	AU/mL
IgG RBD	Vaccinated	0	MF8	122326	AU/mL
IgG RBD	Vaccinated	0	MF9	207748	AU/mL
IgG RBD	Vaccinated	0	MF10	209109	AU/mL
IgG N	Naive	0	MF1	20.2392	AU/mL
IgG N	Naive	0	MF2	218.915	AU/mL
IgG N	Naive	0	MF3	1443.05	AU/mL
IgG N	Naive	0	MF4	173.968	AU/mL
IgG N	Vaccinated	0	MF5	930.948	AU/mL
IgG N	Vaccinated	0	MF6	1017.92	AU/mL
IgG N	Vaccinated	0	MF7	2349.27	AU/mL
IgG N	Vaccinated	0	MF8	1225.55	AU/mL
IgG N	Vaccinated	0	MF9	1465.8	AU/mL
IgG N	Vaccinated	0	MF10	451.469	AU/mL
ACE2 spike	Naive	0	MF1	1.12348e-06	1/ECL
ACE2 spike	Naive	0	MF2	1.11134e-06	1/ECL
ACE2 spike	Naive	0	MF3	1.08007e-06	1/ECL
ACE2 spike	Naive	0	MF4	1.04274e-06	1/ECL
ACE2 spike	Vaccinated	0	MF5	0.0147059	1/ECL
ACE2 spike	Vaccinated	0	MF6	0.008	1/ECL
ACE2 spike	Vaccinated	0	MF7	0.2	1/ECL
ACE2 spike	Vaccinated	0	MF8	0.0277778	1/ECL
ACE2 spike	Vaccinated	0	MF9	0.0344828	1/ECL
ACE2 spike	Vaccinated	0	MF10	0.0144928	1/ECL
ACE2 RBD	Naive	0	MF1	4.13568e-06	1/ECL
ACE2 RBD	Naive	0	MF2	4.04107e-06	1/ECL
ACE2 RBD	Naive	0	MF3	3.44239e-06	1/ECL
ACE2 RBD	Naive	0	MF4	3.34762e-06	1/ECL
ACE2 RBD	Vaccinated	0	MF5	0.0833333	1/ECL
ACE2 RBD	Vaccinated	0	MF6	0.00961538	1/ECL
ACE2 RBD	Vaccinated	0	MF7	0.00555556	1/ECL
ACE2 RBD	Vaccinated	0	MF8	1	1/ECL
ACE2 RBD	Vaccinated	0	MF9	0.00289017	1/ECL
ACE2 RBD	Vaccinated	0	MF10	0.02	1/ECL
