# Supplementary material for: Modelling the response to vaccine in non-human primates to define SARS-CoV-2 mechanistic correlates of protection
Source: eLife. 2022 Jul 8;11:e75427. doi: 10.7554/eLife.75427 (PMC9282856; doi:10.7554/eLife.75427)
Supplement: Figure 5—source data 2. [file elife-75427-fig5-data2.xlsx]

## Sheet: Feuil1
Figure 5B-C
Study [Brouwer 2021]
Test	Fluid	Group	Day post exposure	Animal	Copies/mL		Inoculum	Dose (pfu/animal)	Copies/mL
gRNA	Nasal fluid	Naive	-7	MF1	1			1000000	2.98328e+09
gRNA	Nasal fluid	Naive	-7	MF2	1
gRNA	Nasal fluid	Naive	-7	MF3	1
gRNA	Nasal fluid	Naive	-7	MF4	1
gRNA	Nasal fluid	Naive	1	MF1	43 175 949
gRNA	Nasal fluid	Naive	1	MF2	4 613 500
gRNA	Nasal fluid	Naive	1	MF3	28 494 771
gRNA	Nasal fluid	Naive	1	MF4	9 085 377
gRNA	Nasal fluid	Naive	2	MF1	470 293 007
gRNA	Nasal fluid	Naive	2	MF2	6 034 551
gRNA	Nasal fluid	Naive	2	MF3	46 237 662
gRNA	Nasal fluid	Naive	2	MF4	34 832 343
gRNA	Nasal fluid	Naive	3	MF1	38 514 561
gRNA	Nasal fluid	Naive	3	MF2	22 039 922
gRNA	Nasal fluid	Naive	3	MF3	2 256 420
gRNA	Nasal fluid	Naive	3	MF4	39 054 964
gRNA	Nasal fluid	Naive	4	MF1	82 893
gRNA	Nasal fluid	Naive	4	MF2	112 979
gRNA	Nasal fluid	Naive	4	MF3	16 313
gRNA	Nasal fluid	Naive	4	MF4	1 949 518
gRNA	Nasal fluid	Naive	5	MF1	73 239
gRNA	Nasal fluid	Naive	5	MF2	99 061
gRNA	Nasal fluid	Naive	5	MF3	71 019
gRNA	Nasal fluid	Naive	5	MF4	1 801 291
gRNA	Nasal fluid	Naive	6	MF1	36 983
gRNA	Nasal fluid	Naive	6	MF2	20 993
gRNA	Nasal fluid	Naive	6	MF3	16 126
gRNA	Nasal fluid	Naive	6	MF4	102 563
gRNA	Nasal fluid	Naive	10	MF1	213
gRNA	Nasal fluid	Naive	10	MF2	761
gRNA	Nasal fluid	Naive	10	MF3	1
gRNA	Nasal fluid	Naive	10	MF4	3 392
gRNA	Nasal fluid	Naive	14	MF1	1
gRNA	Nasal fluid	Naive	14	MF2	1
gRNA	Nasal fluid	Naive	14	MF3	38 291
gRNA	Nasal fluid	Naive	14	MF4	7 923
gRNA	Nasal fluid	Naive	21	MF1	1
gRNA	Nasal fluid	Naive	21	MF2	1
gRNA	Nasal fluid	Vaccinated	1	MF5	40 032
gRNA	Nasal fluid	Vaccinated	1	MF6	156 455
gRNA	Nasal fluid	Vaccinated	1	MF7	182 735
gRNA	Nasal fluid	Vaccinated	1	MF8	1
gRNA	Nasal fluid	Vaccinated	1	MF9	11 060
gRNA	Nasal fluid	Vaccinated	1	MF10	536 531
gRNA	Nasal fluid	Vaccinated	2	MF5	159 005
gRNA	Nasal fluid	Vaccinated	2	MF6	32 218
gRNA	Nasal fluid	Vaccinated	2	MF7	118 082
gRNA	Nasal fluid	Vaccinated	2	MF8	451
gRNA	Nasal fluid	Vaccinated	2	MF9	6 553
gRNA	Nasal fluid	Vaccinated	2	MF10	10 396
gRNA	Nasal fluid	Vaccinated	3	MF5	2 005
gRNA	Nasal fluid	Vaccinated	3	MF6	5 015
gRNA	Nasal fluid	Vaccinated	3	MF7	5 920
gRNA	Nasal fluid	Vaccinated	3	MF8	1
gRNA	Nasal fluid	Vaccinated	3	MF9	1
gRNA	Nasal fluid	Vaccinated	3	MF10	90 148
gRNA	Nasal fluid	Vaccinated	4	MF5	1
gRNA	Nasal fluid	Vaccinated	4	MF6	1 009
gRNA	Nasal fluid	Vaccinated	4	MF7	7 285
gRNA	Nasal fluid	Vaccinated	4	MF8	73
gRNA	Nasal fluid	Vaccinated	4	MF9	1
gRNA	Nasal fluid	Vaccinated	4	MF10	607
gRNA	Nasal fluid	Vaccinated	5	MF5	1
gRNA	Nasal fluid	Vaccinated	5	MF6	97 584
gRNA	Nasal fluid	Vaccinated	5	MF7	454
gRNA	Nasal fluid	Vaccinated	5	MF8	1
gRNA	Nasal fluid	Vaccinated	5	MF9	1
gRNA	Nasal fluid	Vaccinated	5	MF10	271
gRNA	Nasal fluid	Vaccinated	6	MF5	1
gRNA	Nasal fluid	Vaccinated	6	MF6	1
gRNA	Nasal fluid	Vaccinated	6	MF7	966
gRNA	Nasal fluid	Vaccinated	6	MF8	1
gRNA	Nasal fluid	Vaccinated	6	MF9	1
gRNA	Nasal fluid	Vaccinated	6	MF10	1
gRNA	Nasal fluid	Vaccinated	10	MF5	1
gRNA	Nasal fluid	Vaccinated	10	MF6	1
gRNA	Nasal fluid	Vaccinated	10	MF7	1
gRNA	Nasal fluid	Vaccinated	10	MF8	1
gRNA	Nasal fluid	Vaccinated	10	MF9	1
gRNA	Nasal fluid	Vaccinated	10	MF10	1
gRNA	Nasal fluid	Vaccinated	14	MF5	1
gRNA	Nasal fluid	Vaccinated	14	MF6	1
gRNA	Nasal fluid	Vaccinated	14	MF7	1
gRNA	Nasal fluid	Vaccinated	14	MF8	1
gRNA	Nasal fluid	Vaccinated	14	MF9	1
gRNA	Nasal fluid	Vaccinated	14	MF10	1
gRNA	Nasal fluid	Vaccinated	21	MF5	1
gRNA	Nasal fluid	Vaccinated	21	MF6	1
gRNA	Nasal fluid	Vaccinated	21	MF7	1
gRNA	Nasal fluid	Vaccinated	21	MF8	1
gRNA	Nasal fluid	Vaccinated	21	MF9	1
gRNA	Nasal fluid	Vaccinated	21	MF10	1
gRNA	Tracheal Fluid	Naive	-7	MF1	1
gRNA	Tracheal Fluid	Naive	-7	MF2	1
gRNA	Tracheal Fluid	Naive	-7	MF3	1
gRNA	Tracheal Fluid	Naive	-7	MF4	1
gRNA	Tracheal Fluid	Naive	1	MF1	1 877 891
gRNA	Tracheal Fluid	Naive	1	MF2	576 932
gRNA	Tracheal Fluid	Naive	1	MF3	36 829 718
gRNA	Tracheal Fluid	Naive	1	MF4	3 136 486
gRNA	Tracheal Fluid	Naive	2	MF1	4 749 831
gRNA	Tracheal Fluid	Naive	2	MF2	3 693 658
gRNA	Tracheal Fluid	Naive	2	MF3	2 756 830
gRNA	Tracheal Fluid	Naive	2	MF4	2 348 469
gRNA	Tracheal Fluid	Naive	3	MF1	482 449
gRNA	Tracheal Fluid	Naive	3	MF2	211 283
gRNA	Tracheal Fluid	Naive	3	MF3	663 028
gRNA	Tracheal Fluid	Naive	3	MF4	6 818 651
gRNA	Tracheal Fluid	Naive	4	MF1	221 868
gRNA	Tracheal Fluid	Naive	4	MF2	327 830
gRNA	Tracheal Fluid	Naive	4	MF3	82 046
gRNA	Tracheal Fluid	Naive	4	MF4	101 658
gRNA	Tracheal Fluid	Naive	5	MF1	1
gRNA	Tracheal Fluid	Naive	5	MF2	3 508
gRNA	Tracheal Fluid	Naive	5	MF3	7 779
gRNA	Tracheal Fluid	Naive	5	MF4	270 703
gRNA	Tracheal Fluid	Naive	6	MF1	8 082
gRNA	Tracheal Fluid	Naive	6	MF2	2 028
gRNA	Tracheal Fluid	Naive	6	MF3	7 873
gRNA	Tracheal Fluid	Naive	6	MF4	8 867
gRNA	Tracheal Fluid	Naive	10	MF1	505
gRNA	Tracheal Fluid	Naive	10	MF2	1
gRNA	Tracheal Fluid	Naive	10	MF3	1
gRNA	Tracheal Fluid	Naive	10	MF4	1
gRNA	Tracheal Fluid	Naive	14	MF1	1
gRNA	Tracheal Fluid	Naive	14	MF2	1
gRNA	Tracheal Fluid	Naive	14	MF3	1
gRNA	Tracheal Fluid	Naive	14	MF4	1
gRNA	Tracheal Fluid	Naive	21	MF1	1
gRNA	Tracheal Fluid	Naive	21	MF2	1
gRNA	Tracheal Fluid	Vaccinated	1	MF5	3 400
gRNA	Tracheal Fluid	Vaccinated	1	MF6	9 263
gRNA	Tracheal Fluid	Vaccinated	1	MF7	406
gRNA	Tracheal Fluid	Vaccinated	1	MF8	120 322
gRNA	Tracheal Fluid	Vaccinated	1	MF9	1 686
gRNA	Tracheal Fluid	Vaccinated	1	MF10	88 804
gRNA	Tracheal Fluid	Vaccinated	2	MF5	665
gRNA	Tracheal Fluid	Vaccinated	2	MF6	107 652
gRNA	Tracheal Fluid	Vaccinated	2	MF7	4 369
gRNA	Tracheal Fluid	Vaccinated	2	MF8	939
gRNA	Tracheal Fluid	Vaccinated	2	MF9	1
gRNA	Tracheal Fluid	Vaccinated	2	MF10	71 944
gRNA	Tracheal Fluid	Vaccinated	3	MF5	162
gRNA	Tracheal Fluid	Vaccinated	3	MF6	13 973
gRNA	Tracheal Fluid	Vaccinated	3	MF7	3 127
gRNA	Tracheal Fluid	Vaccinated	3	MF8	1
gRNA	Tracheal Fluid	Vaccinated	3	MF9	1
gRNA	Tracheal Fluid	Vaccinated	3	MF10	140
gRNA	Tracheal Fluid	Vaccinated	4	MF5	1
gRNA	Tracheal Fluid	Vaccinated	4	MF6	1 177
gRNA	Tracheal Fluid	Vaccinated	4	MF7	1
gRNA	Tracheal Fluid	Vaccinated	4	MF8	1
gRNA	Tracheal Fluid	Vaccinated	4	MF9	1
gRNA	Tracheal Fluid	Vaccinated	4	MF10	1
gRNA	Tracheal Fluid	Vaccinated	5	MF5	1
gRNA	Tracheal Fluid	Vaccinated	5	MF6	424
gRNA	Tracheal Fluid	Vaccinated	5	MF7	1
gRNA	Tracheal Fluid	Vaccinated	5	MF8	1
gRNA	Tracheal Fluid	Vaccinated	5	MF9	1
gRNA	Tracheal Fluid	Vaccinated	5	MF10	1
gRNA	Tracheal Fluid	Vaccinated	6	MF5	1
gRNA	Tracheal Fluid	Vaccinated	6	MF6	1
gRNA	Tracheal Fluid	Vaccinated	6	MF7	1
gRNA	Tracheal Fluid	Vaccinated	6	MF8	1
gRNA	Tracheal Fluid	Vaccinated	6	MF9	1
gRNA	Tracheal Fluid	Vaccinated	6	MF10	1
gRNA	Tracheal Fluid	Vaccinated	10	MF5	1
gRNA	Tracheal Fluid	Vaccinated	10	MF6	1
gRNA	Tracheal Fluid	Vaccinated	10	MF7	1
gRNA	Tracheal Fluid	Vaccinated	10	MF8	1
gRNA	Tracheal Fluid	Vaccinated	10	MF9	1
gRNA	Tracheal Fluid	Vaccinated	10	MF10	1
gRNA	Tracheal Fluid	Vaccinated	14	MF5	1
gRNA	Tracheal Fluid	Vaccinated	14	MF6	1
gRNA	Tracheal Fluid	Vaccinated	14	MF7	1
gRNA	Tracheal Fluid	Vaccinated	14	MF8	1
gRNA	Tracheal Fluid	Vaccinated	14	MF9	1
gRNA	Tracheal Fluid	Vaccinated	14	MF10	1
gRNA	Tracheal Fluid	Vaccinated	21	MF5	1
gRNA	Tracheal Fluid	Vaccinated	21	MF6	1
gRNA	Tracheal Fluid	Vaccinated	21	MF7	1
gRNA	Tracheal Fluid	Vaccinated	21	MF8	1
gRNA	Tracheal Fluid	Vaccinated	21	MF9	1
gRNA	Tracheal Fluid	Vaccinated	21	MF10	1
sgRNA	Nasal fluid	Naive	2	MF1	7.51367e+06
sgRNA	Nasal fluid	Naive	5	MF1	0
sgRNA	Nasal fluid	Naive	6	MF1	0
sgRNA	Nasal fluid	Naive	2	MF2	83578.3
sgRNA	Nasal fluid	Naive	5	MF2	1569.39
sgRNA	Nasal fluid	Naive	6	MF2	1430.12
sgRNA	Nasal fluid	Naive	2	MF3	1.54874e+06
sgRNA	Nasal fluid	Naive	5	MF3	713.753
sgRNA	Nasal fluid	Naive	6	MF3	900.623
sgRNA	Nasal fluid	Naive	2	MF4	1.85475e+06
sgRNA	Nasal fluid	Naive	5	MF4	12090
sgRNA	Nasal fluid	Naive	6	MF4	0
sgRNA	Nasal fluid	Vaccinated	2	MF5	172.252
sgRNA	Nasal fluid	Vaccinated	5	MF5	0
sgRNA	Nasal fluid	Vaccinated	6	MF5	0
sgRNA	Nasal fluid	Vaccinated	2	MF6	0
sgRNA	Nasal fluid	Vaccinated	5	MF6	273.499
sgRNA	Nasal fluid	Vaccinated	6	MF6	0
sgRNA	Nasal fluid	Vaccinated	2	MF7	0
sgRNA	Nasal fluid	Vaccinated	5	MF7	0
sgRNA	Nasal fluid	Vaccinated	6	MF7	0
sgRNA	Nasal fluid	Vaccinated	2	MF8	0
sgRNA	Nasal fluid	Vaccinated	5	MF8	0
sgRNA	Nasal fluid	Vaccinated	6	MF8	0
sgRNA	Nasal fluid	Vaccinated	2	MF9	0
sgRNA	Nasal fluid	Vaccinated	5	MF9	0
sgRNA	Nasal fluid	Vaccinated	6	MF9	0
sgRNA	Nasal fluid	Vaccinated	2	MF10	0
sgRNA	Nasal fluid	Vaccinated	5	MF10	0
sgRNA	Nasal fluid	Vaccinated	6	MF10	0
sgRNA	Tracheal fluid	Naive	2	MF1	47029
sgRNA	Tracheal fluid	Naive	5	MF1	0
sgRNA	Tracheal fluid	Naive	6	MF1	0
sgRNA	Tracheal fluid	Naive	2	MF2	45355.1
sgRNA	Tracheal fluid	Naive	5	MF2	0
sgRNA	Tracheal fluid	Naive	6	MF2	0
sgRNA	Tracheal fluid	Naive	2	MF3	91227.1
sgRNA	Tracheal fluid	Naive	5	MF3	0
sgRNA	Tracheal fluid	Naive	6	MF3	0
sgRNA	Tracheal fluid	Naive	2	MF4	54094.4
sgRNA	Tracheal fluid	Naive	5	MF4	760.662
sgRNA	Tracheal fluid	Naive	6	MF4	0
sgRNA	Tracheal fluid	Vaccinated	2	MF5	0
sgRNA	Tracheal fluid	Vaccinated	5	MF5	0
sgRNA	Tracheal fluid	Vaccinated	6	MF5	0
sgRNA	Tracheal fluid	Vaccinated	2	MF6	467.468
sgRNA	Tracheal fluid	Vaccinated	5	MF6	0
sgRNA	Tracheal fluid	Vaccinated	6	MF6	0
sgRNA	Tracheal fluid	Vaccinated	2	MF7	0
sgRNA	Tracheal fluid	Vaccinated	5	MF7	0
sgRNA	Tracheal fluid	Vaccinated	6	MF7	0
sgRNA	Tracheal fluid	Vaccinated	2	MF8	0
sgRNA	Tracheal fluid	Vaccinated	5	MF8	0
sgRNA	Tracheal fluid	Vaccinated	6	MF8	0
sgRNA	Tracheal fluid	Vaccinated	2	MF9	0
sgRNA	Tracheal fluid	Vaccinated	5	MF9	0
sgRNA	Tracheal fluid	Vaccinated	6	MF9	0
sgRNA	Tracheal fluid	Vaccinated	2	MF10	621.093
sgRNA	Tracheal fluid	Vaccinated	5	MF10	0
sgRNA	Tracheal fluid	Vaccinated	6	MF10	0
