# Supplementary figures and images for: Modelling the response to vaccine in non-human primates to define SARS-CoV-2 mechanistic correlates of protection
Source: eLife journal article supplement (doi:10.7554/elife.75427), 2022-06-23

**Figure 1 – figure supplement 1**


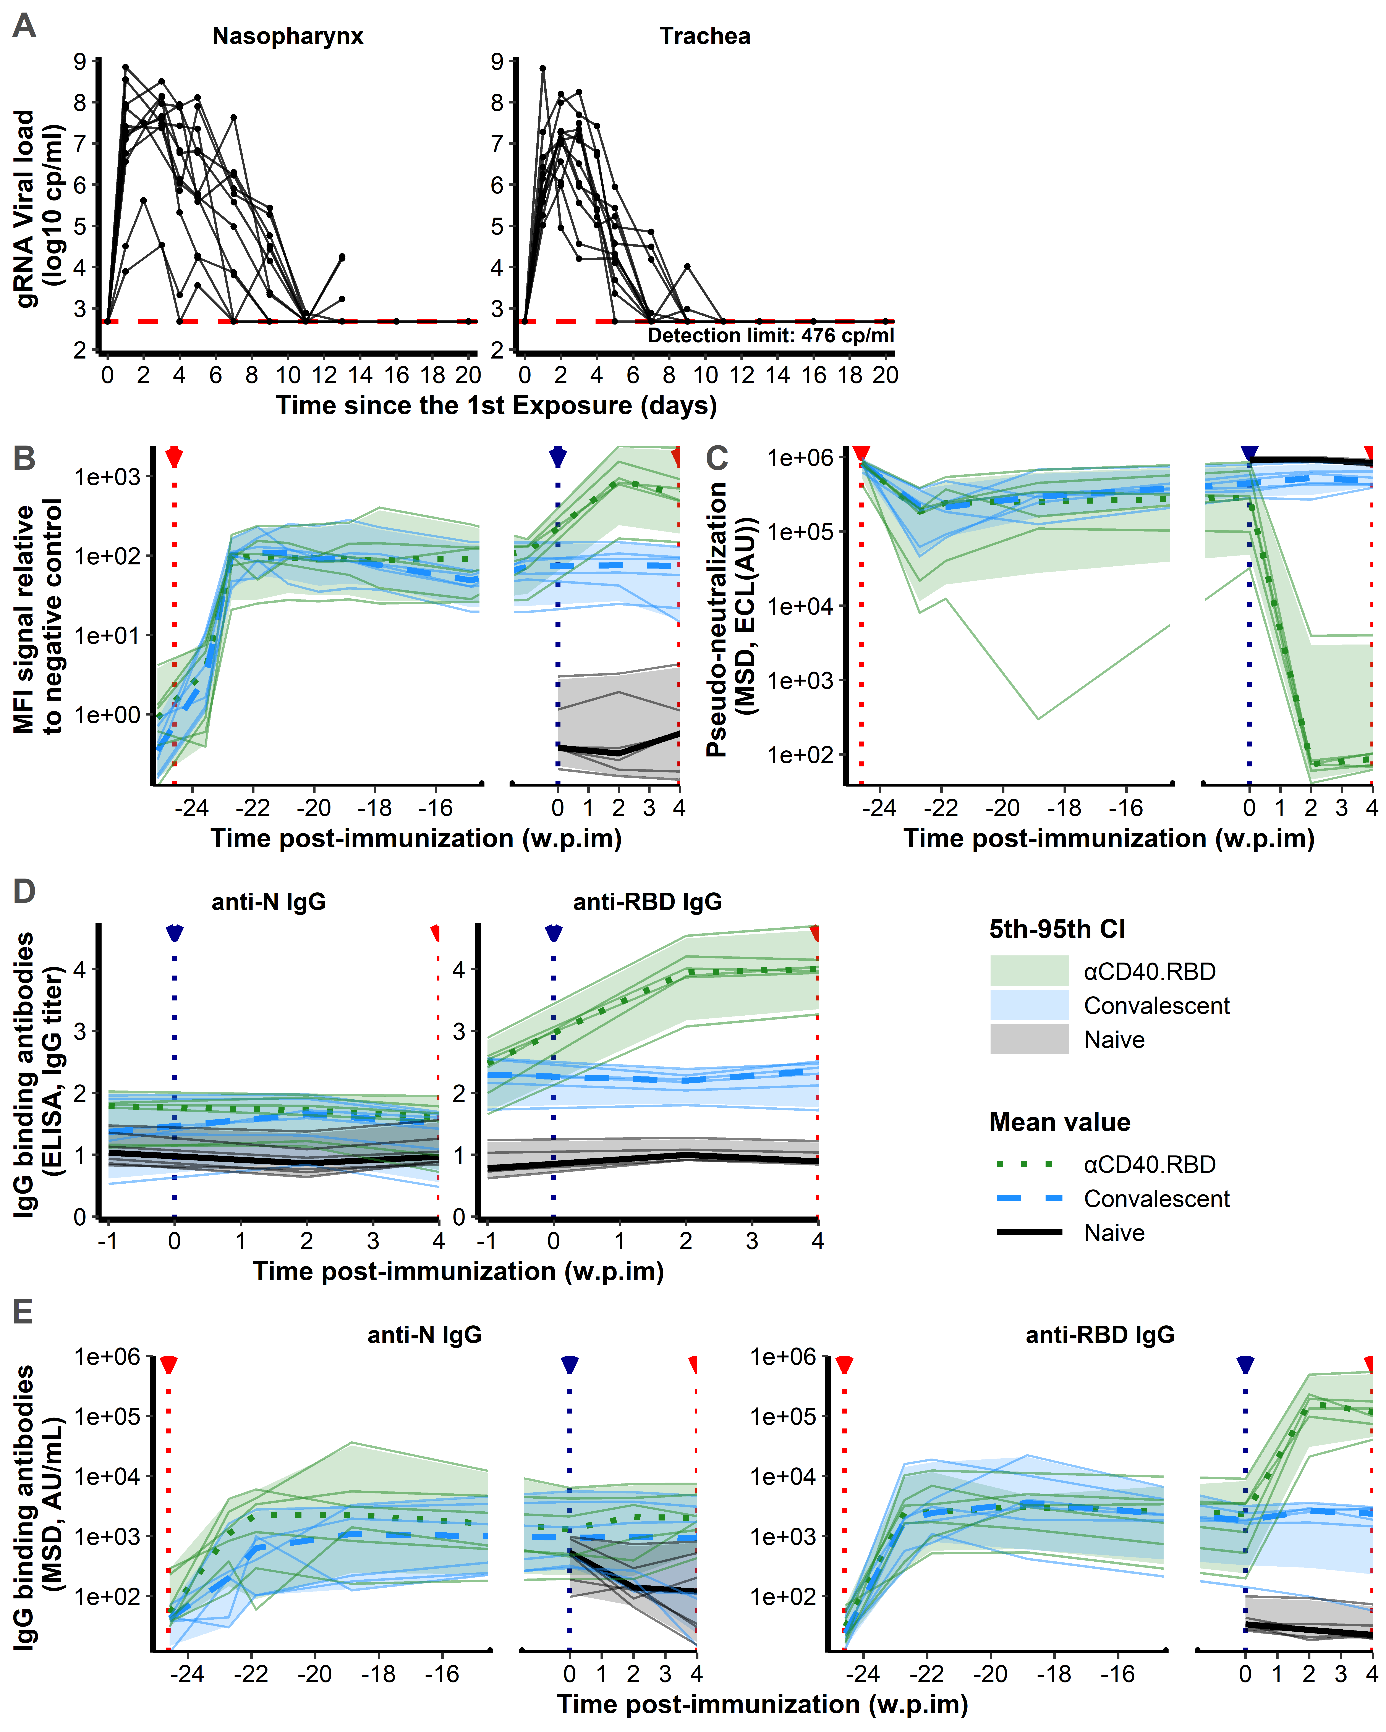

Supplement: supp [file elife_poa_e75427_Figure_1_figure_supplement_1.docx]

**Figure 1 – figure supplement 2**


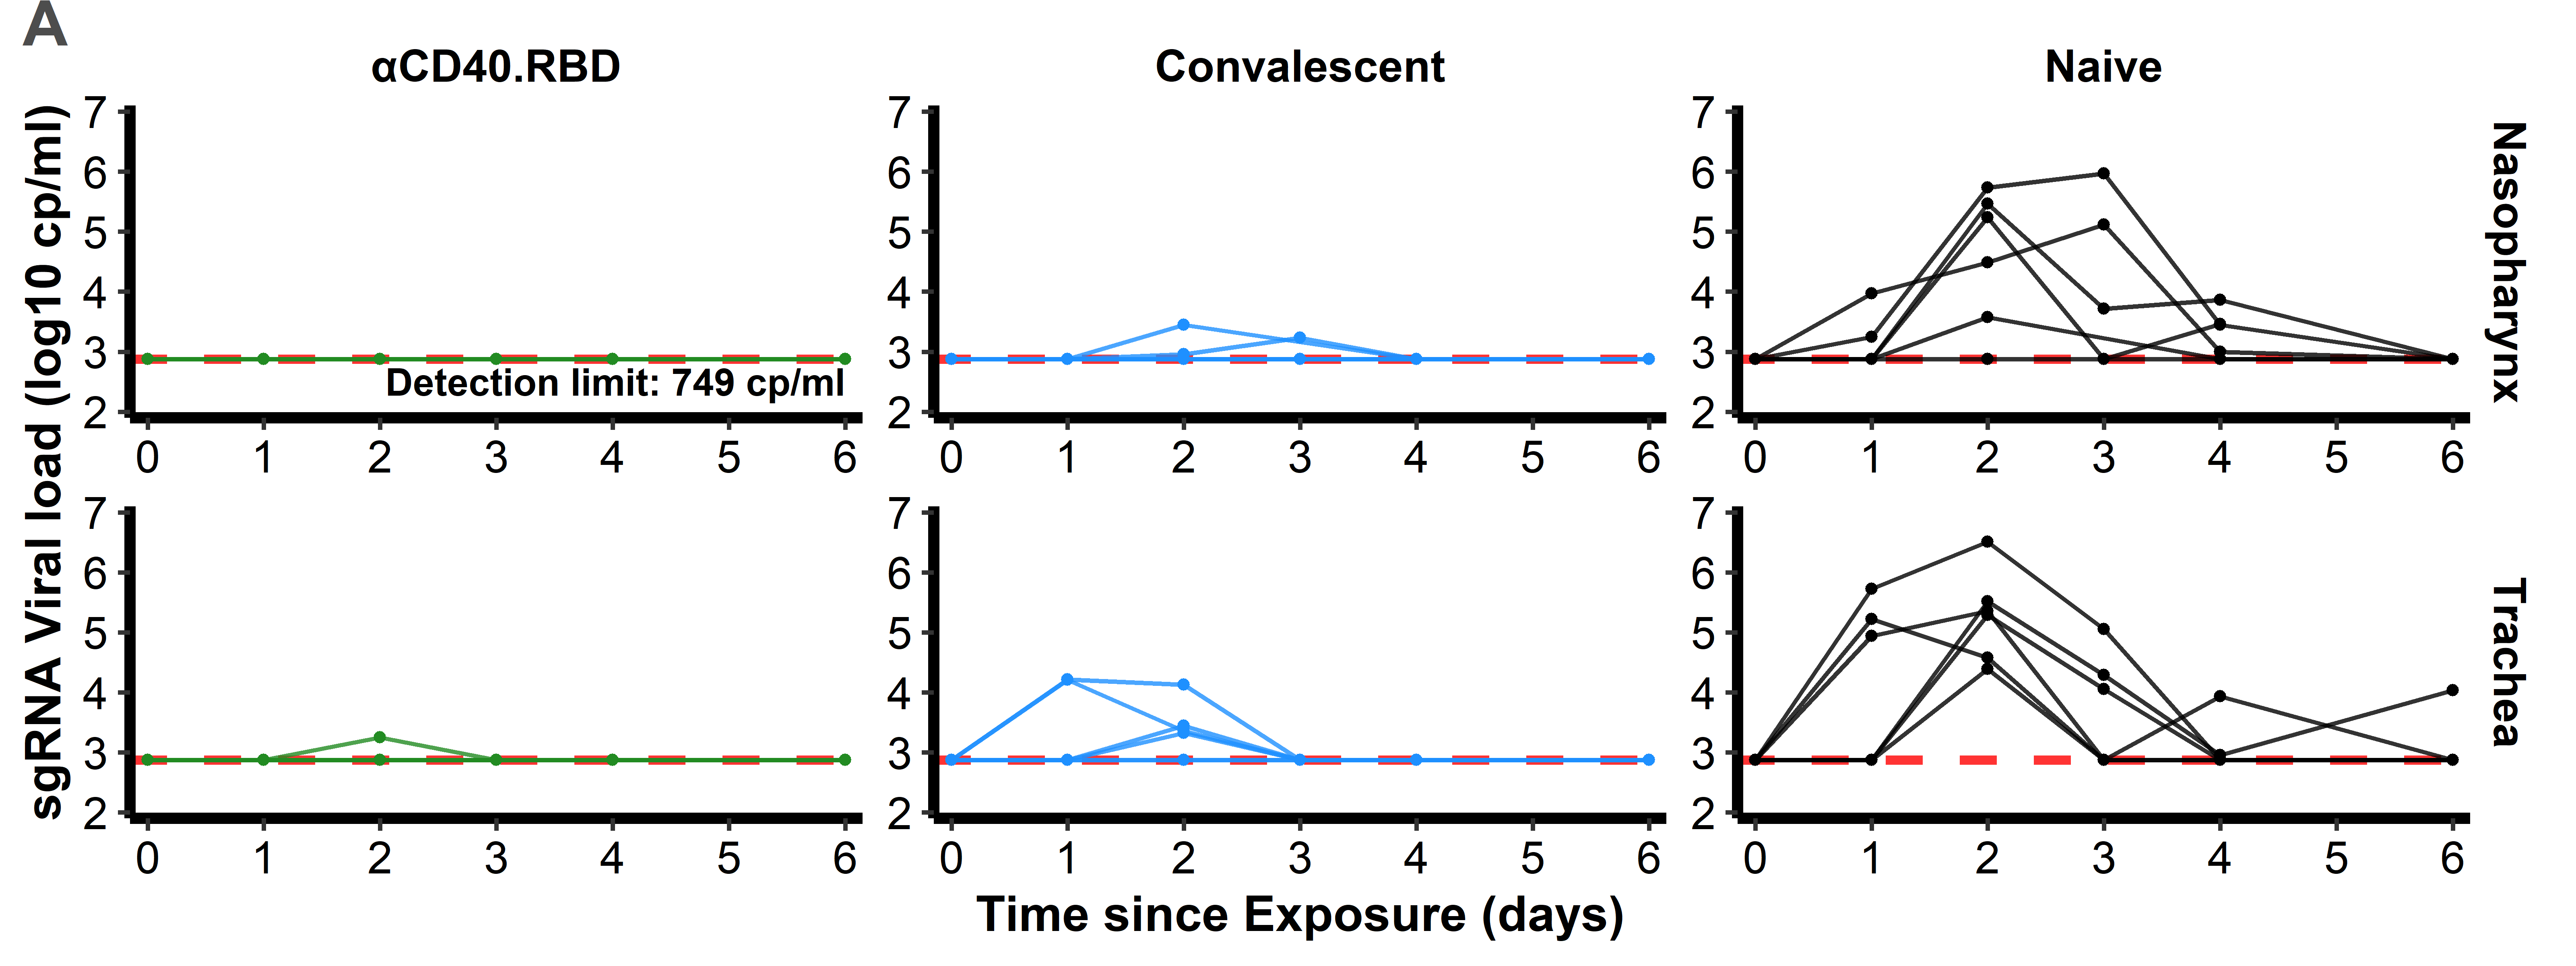

Supplement: supp [file elife_poa_e75427_Figure_1_figure_supplement_2.docx]

**Figure 1 – figure supplement 3**

**
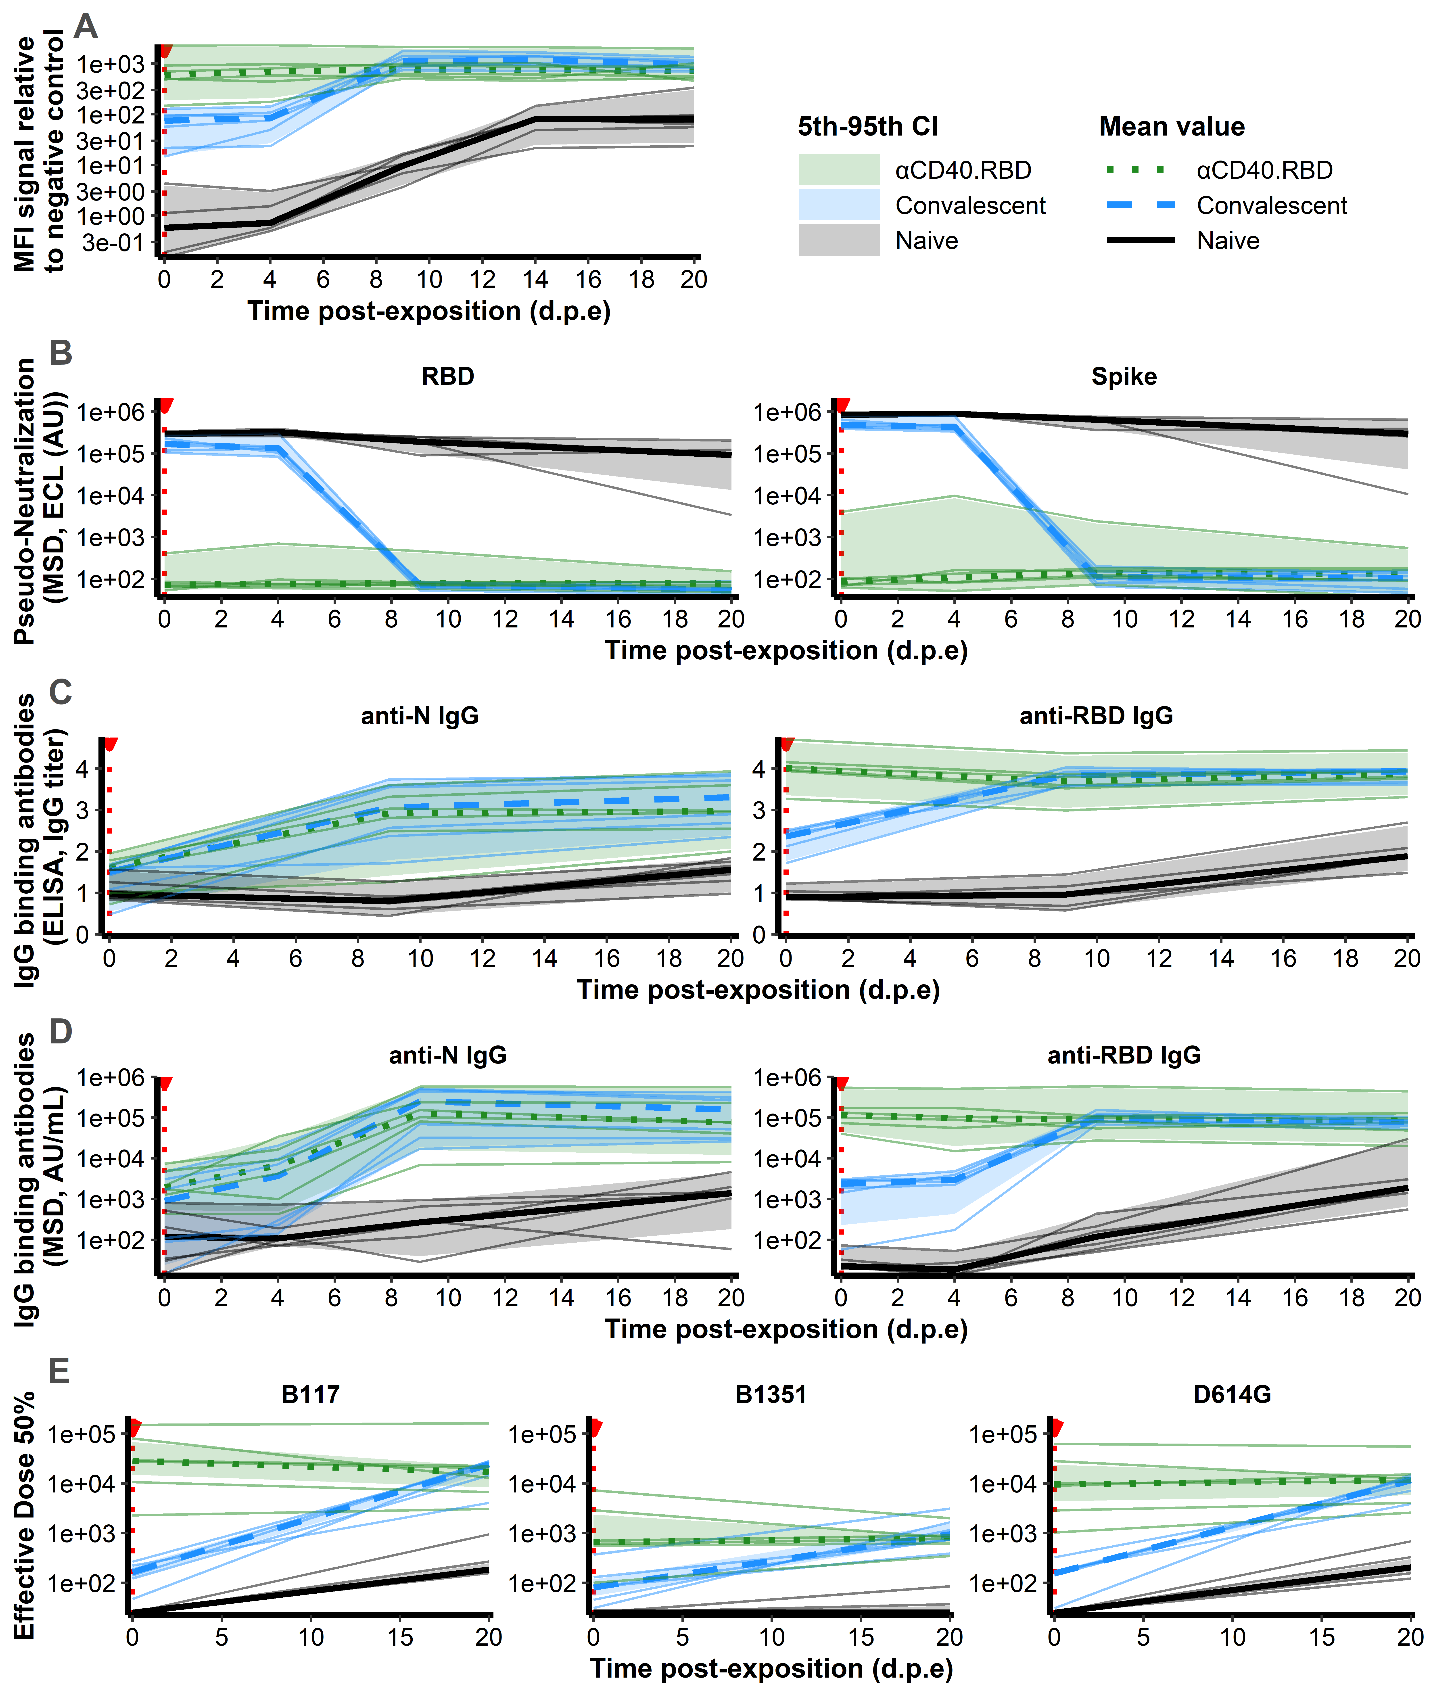
**

Supplement: supp [file elife_poa_e75427_Figure_1_figure_supplement_3.docx]

**Figure 1 – figure supplement 4**


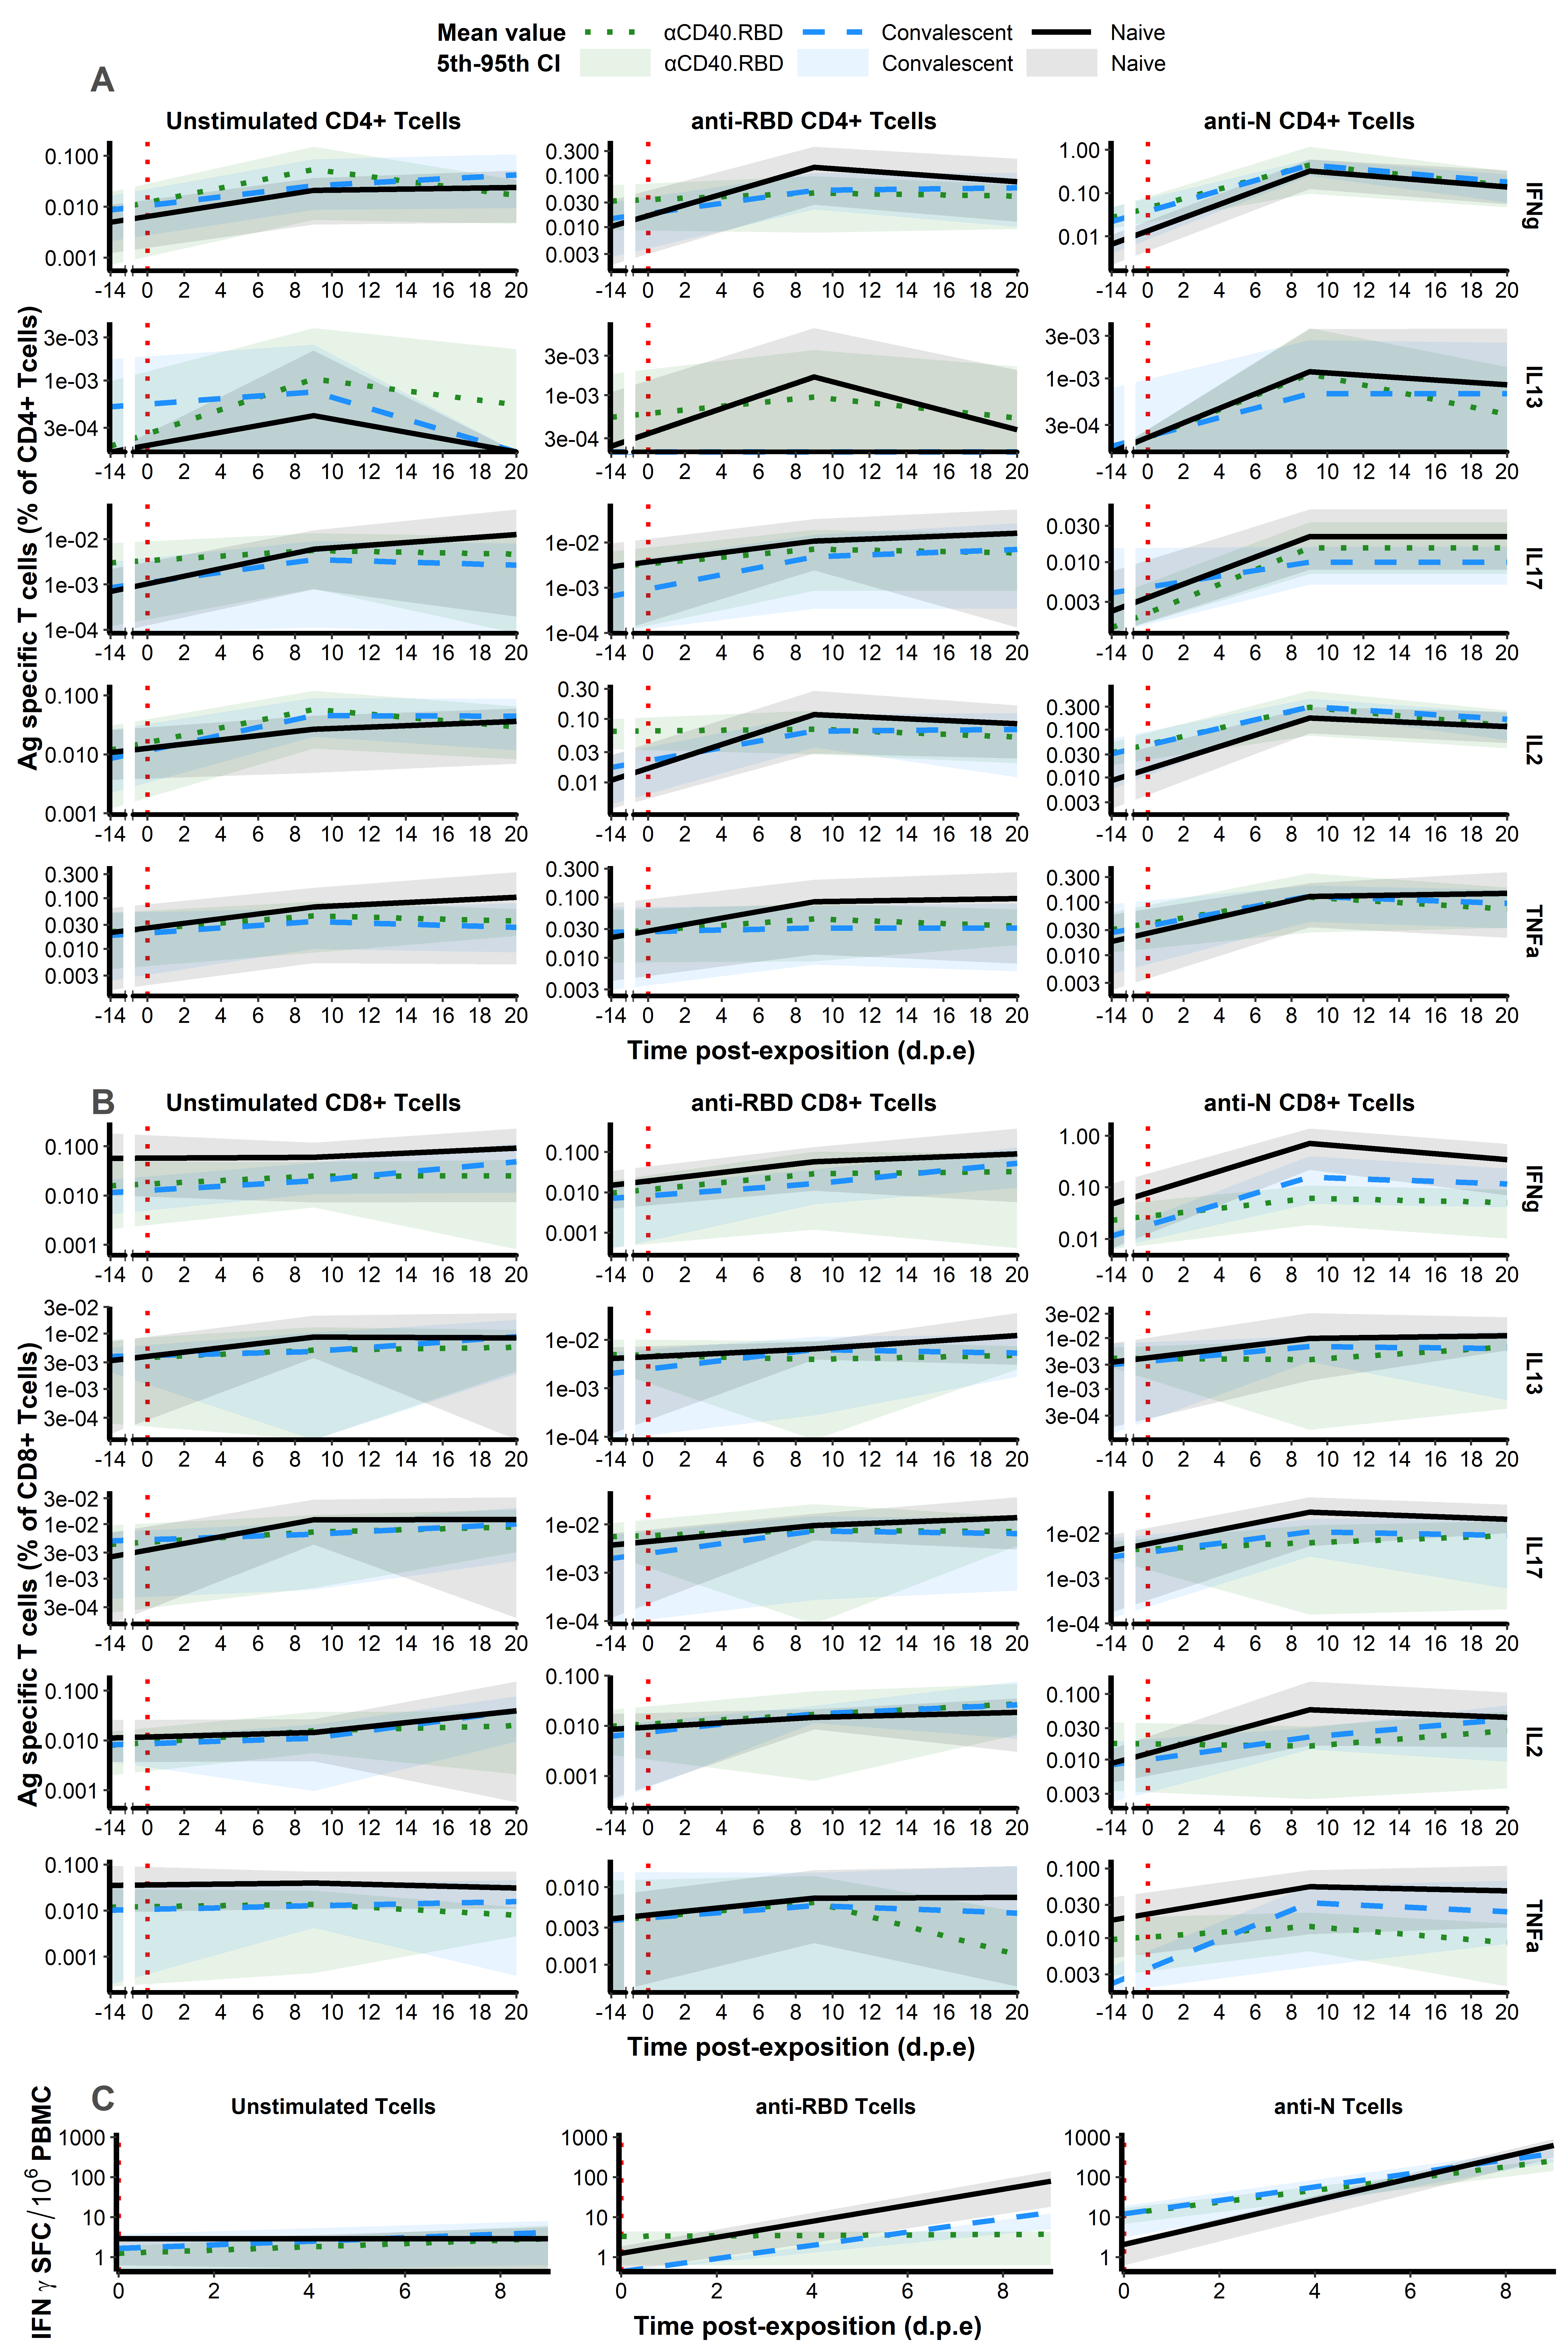

Supplement: supp [file elife_poa_e75427_Figure_1_figure_supplement_4.docx]

**Figure 1 – figure supplement 5**


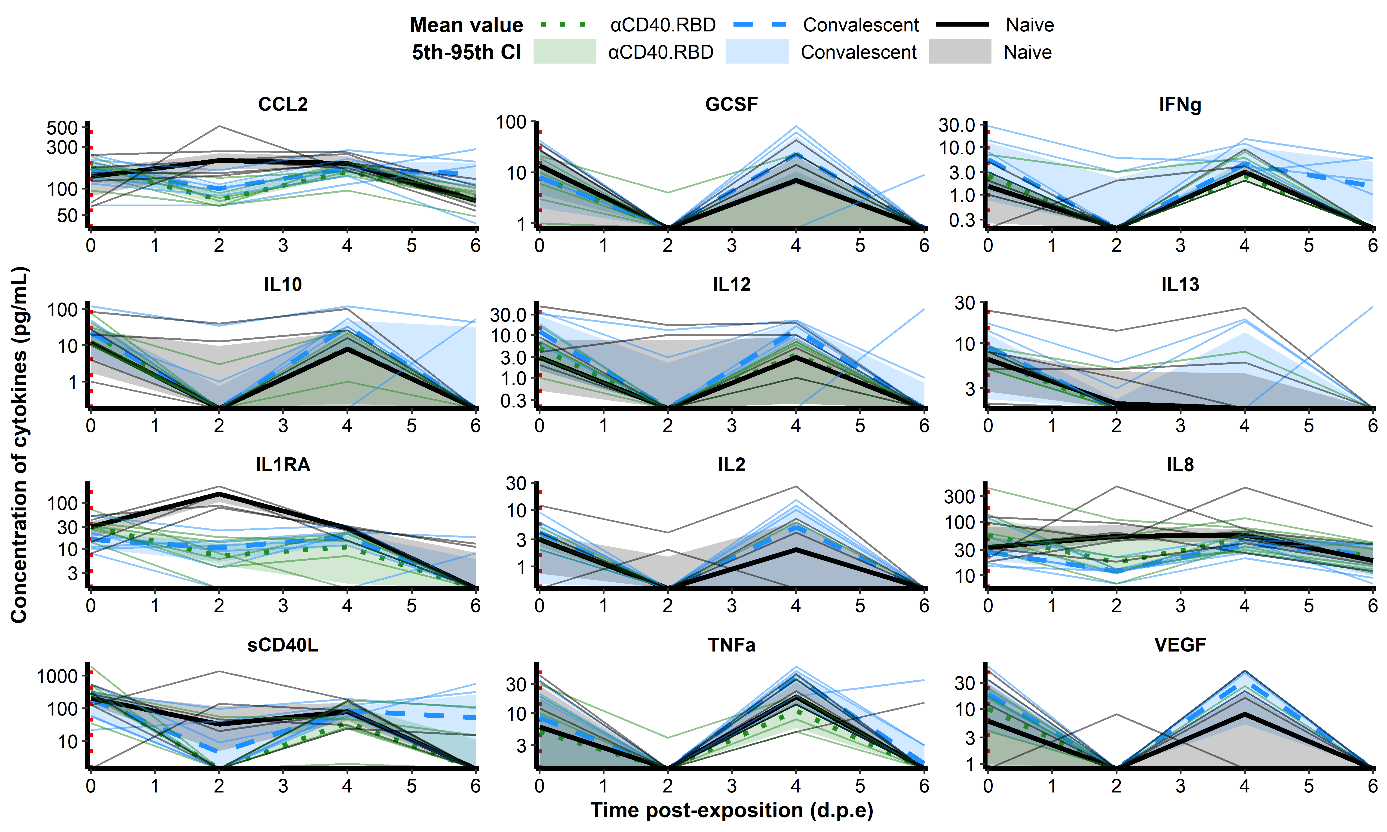

Supplement: supp [file elife_poa_e75427_Figure_1_figure_supplement_5.docx]

**Figure 2 – figure supplement 1**


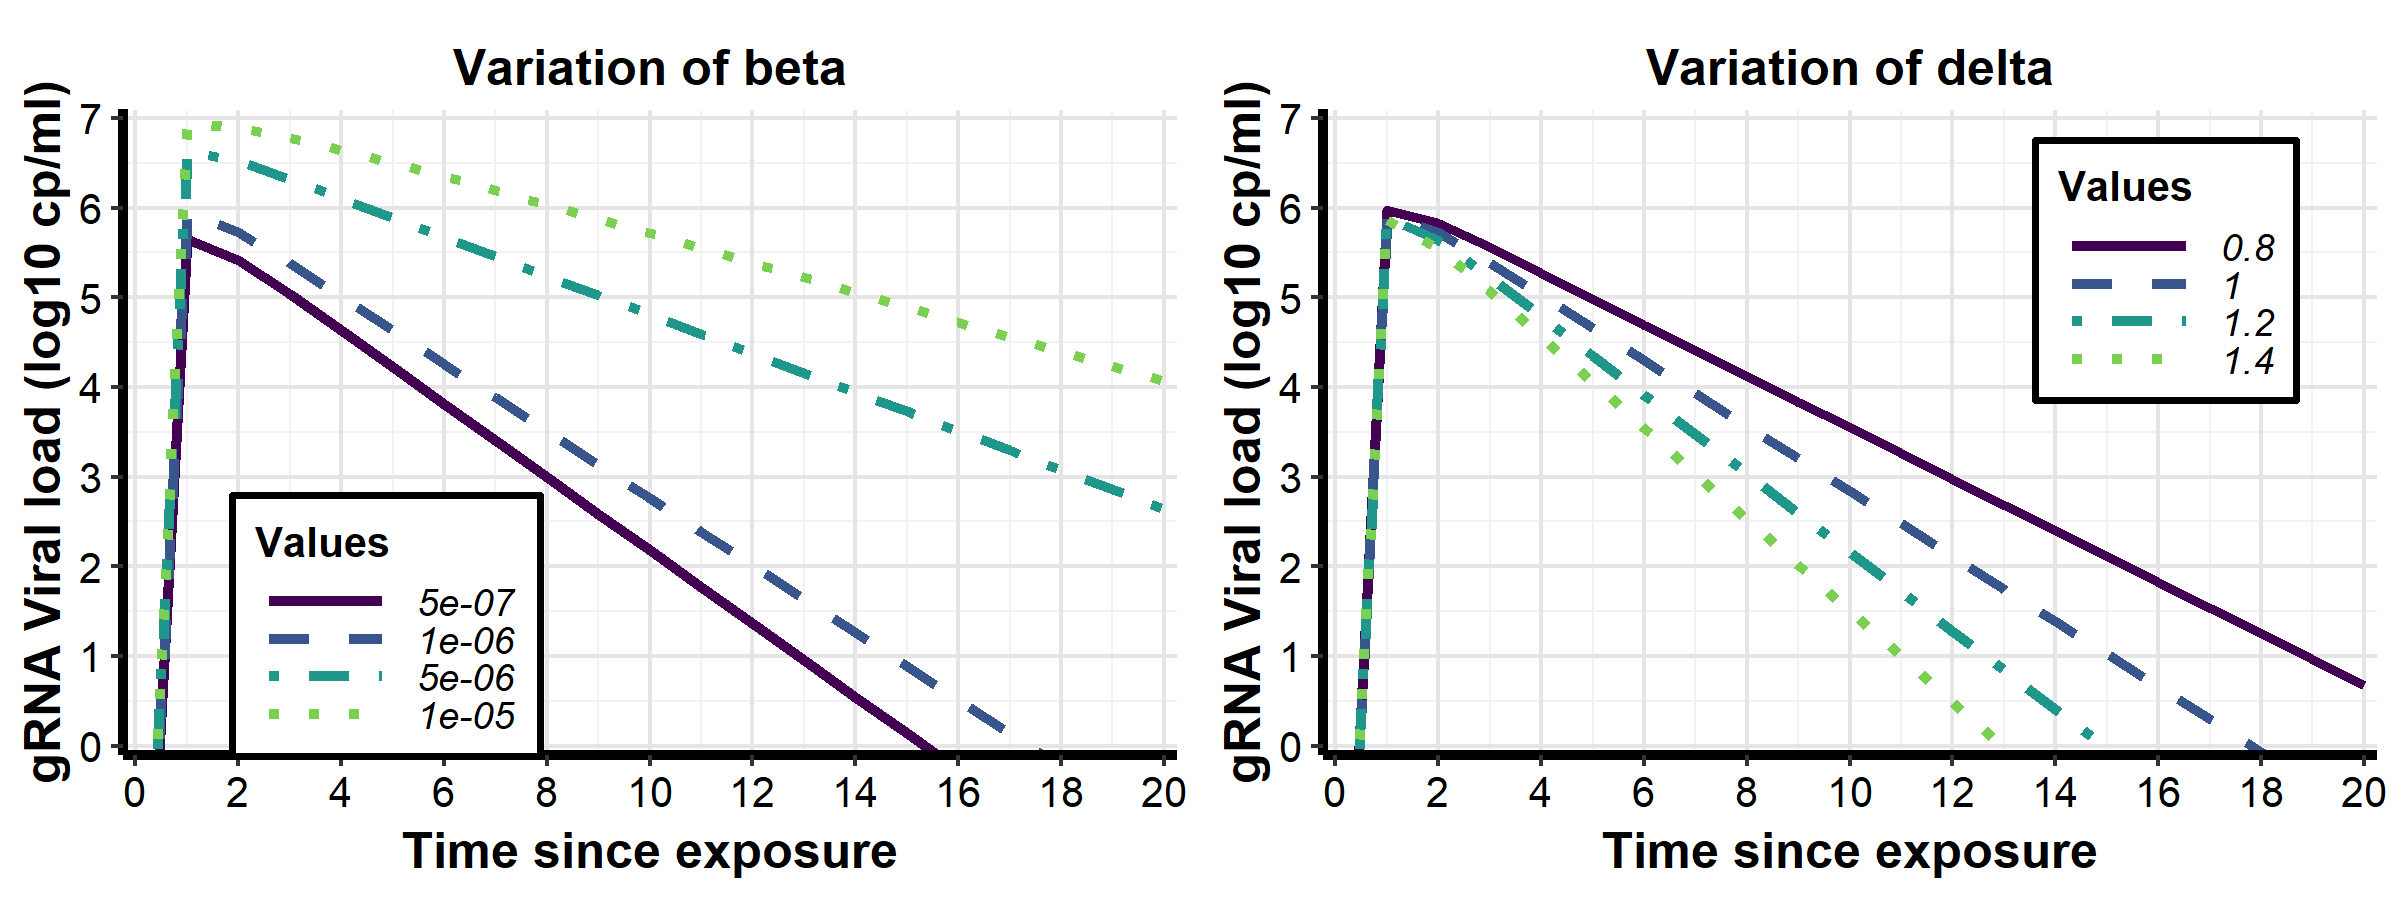

Supplement: supp [file elife_poa_e75427_Figure_2_figure_supplement_1.docx]

**Figure 2 – figure supplement 2**


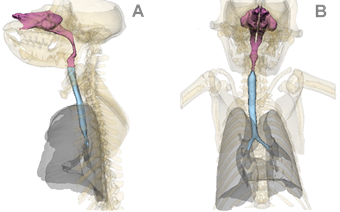

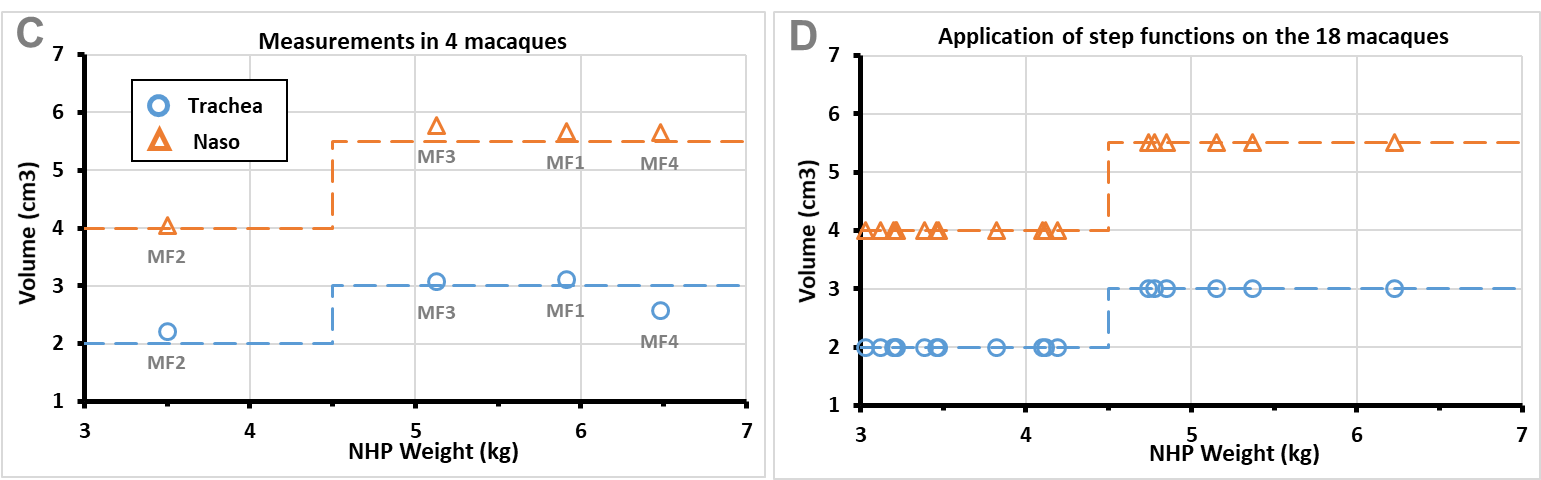

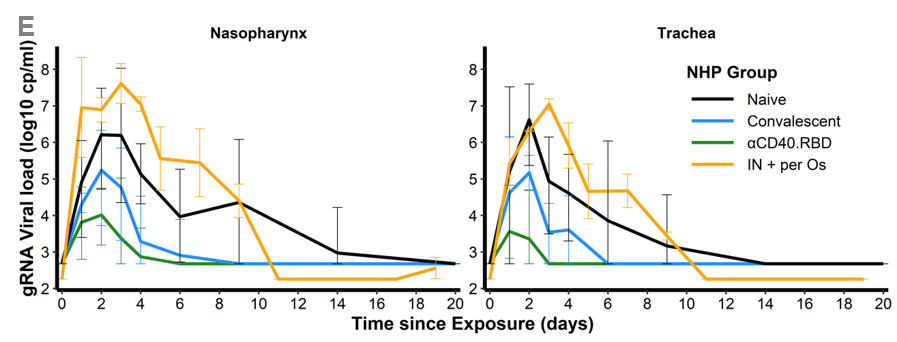

Supplement: supp [file elife_poa_e75427_Figure_2_figure_supplement_2.docx]

**Figure 4 – figure supplement 1**


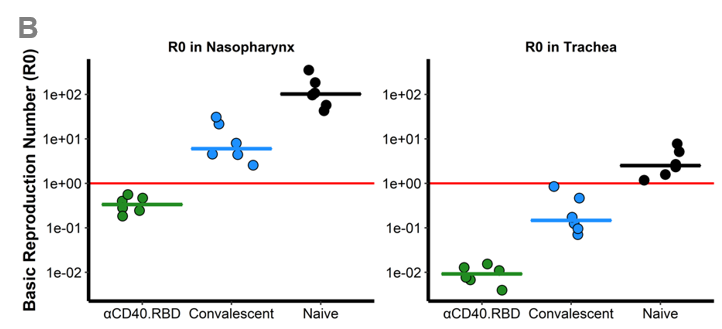

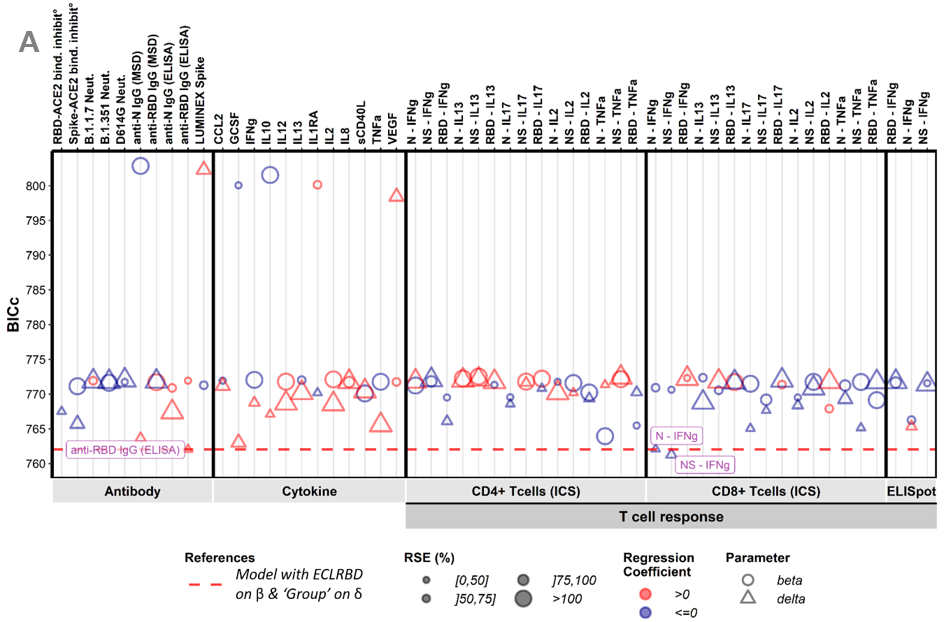

Supplement: supp [file elife_poa_e75427_Figure_4_figure_supplement_1.docx]

**Figure 4 – figure supplement 2**


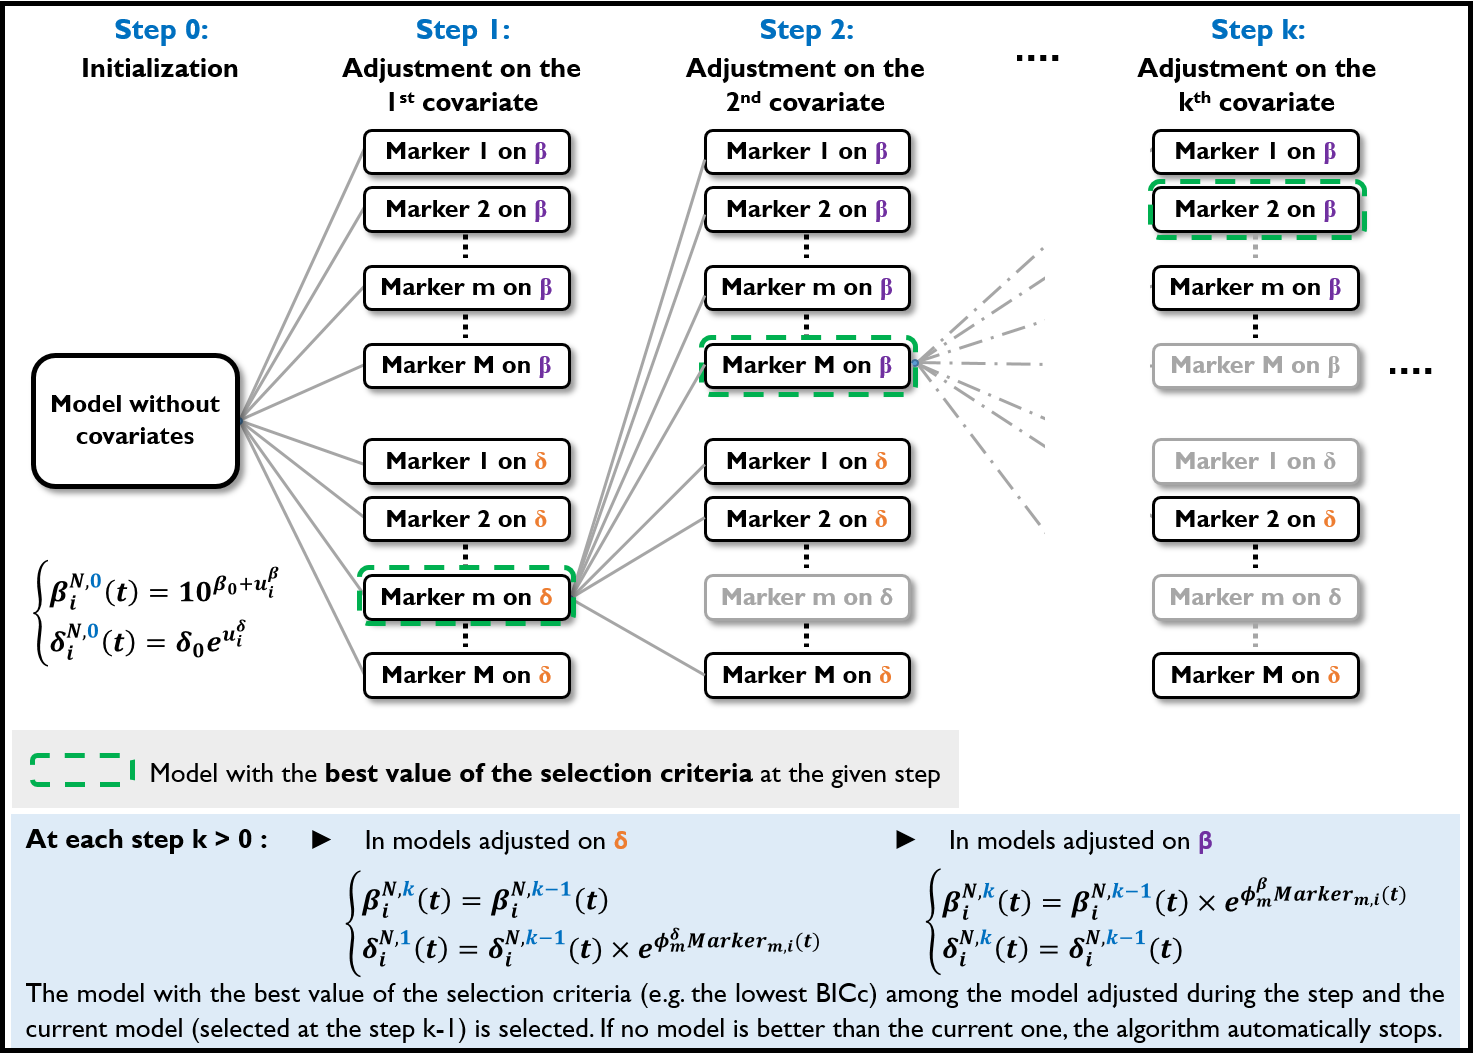

Supplement: supp [file elife_poa_e75427_Figure_4_figure_supplement_2.docx]
